# Supplementary material for: The interplay between inflammatory cytokines and cardiometabolic disease: bi-directional mendelian randomisation study
Source: BMJ Med. 2023 Feb 14;2(1):e000157. doi: 10.1136/bmjmed-2022-000157 (PMC9978757; doi:10.1136/bmjmed-2022-000157)
Supplement: Supplementary data [file bmjmed-2022-000157supp002.xlsx]

## Sheet: ST4 - genome-wide instruments
exposure	rsid	CHR	POS	EA	NEA	EAF	BETA	SE	P	N	R2	F
activePAI	rs11132382	4	187143802	G	T	0.560606	-0.113775	0.0198421	9.80823e-09	5199	0.00637728091591222	33.3554459690157
bNGF	rs28637706	19	34285368	G	T	0.712121	0.1554	0.0261	2.608e-09	3531	0.00990138170177502	35.2914097442355
CTACK	rs2070074	9	34649442	G	A	0.126263	-0.4402	0.0372	2.316e-32	3631	0.0427549992467161	162.087963002402
CTACK	rs135564	22	46535934	G	A	0.747475	0.1673	0.0267	3.46e-10	3631	0.0105662998088159	38.7545946724713
Eotaxin	rs12075	1	159175354	G	A	0.454545	-0.169	0.0155	1.175e-27	8153	0.014162476978418	117.096729588125
Eotaxin	rs2228467	3	42906116	C	T	0.0909091	0.4154	0.0291	2.767e-46	8153	0.0285218471950652	239.307055764183
Eotaxin	rs112347425	3	46460888	C	T	0.893939	-0.1594	0.0276	7.571e-09	8153	0.00481803812308794	39.4619579591487
FGFBasic	rs13412535	2	224874874	G	A	0.782828	0.1654	0.0261	2.498e-10	7565	0.0093018897553322	71.0107261658179
GROa	rs12075	1	159175354	G	A	0.454545	-0.3724	0.0236	3.459e-56	3505	0.0687678034146733	258.682653203913
GROa	rs508977	4	74762383	G	T	0.191919	0.3838	0.0279	4.566e-43	3505	0.0456891211256849	167.711586283146
HGF	rs3748034	4	3446091	G	T	0.853535	-0.1529	0.0233	5.086e-11	8292	0.005845210515167	48.7417006720297
HGF	rs5745687	7	81359051	C	T	0.9646465	0.3008	0.0404	9.673e-14	8292	0.00617143654427769	51.4789077647007
IFNg	rs144329757	1	22923859	C	A	0.989899	-0.3775	0.0674	2.118e-08	7701	0.00284983137983749	22.0035582240639
IFNg	rs77999880	1	22930183	G	A	0.010101	0.3745	0.0674	2.741e-08	7701	0.0028047160281044	21.6542427019584
IL10	rs282258	2	224914800	C	T	0.641414	-0.0993	0.0162	8.122e-10	7681	0.00453586643154987	34.9896266006217
IL10	rs6921438	6	43925607	G	A	0.515152	0.2875	0.0165	9.718e-68	7681	0.04129017204312	330.722833826399
IL12p70	rs6921438	6	43925607	G	A	0.515152	0.3785	0.016	2.39e-124	8270	0.0715653438159179	637.311693104972
IL12p70	rs9472183	6	43940202	G	A	0.570707	0.1007	0.0157	1.288e-10	8270	0.00496885064917203	41.2876091307866
IL12p70	rs2375980	9	2692622	G	C	0.459596	-0.0952	0.0158	1.855e-09	8270	0.00450192947862813	37.3902813390719
IL12p70	rs10761731	10	65027610	T	A	0.343434	0.0965	0.0161	2.046e-09	8270	0.00419958426382568	34.8685963016408
IL13	rs6921438	6	43925607	G	A	0.515152	0.4141	0.0242	8.578e-66	3557	0.08566066772506	333.053236378787
IL16	rs4253283	4	187165211	C	T	0.712121	-0.1506	0.026	7.215e-09	3483	0.00929915994981482	32.6742185700232
IL16	rs1801020	5	176836532	G	A	0.69697	-0.1678	0.0271	5.628e-10	3483	0.0118936079698953	41.8999914150379
IL16	rs1255143	10	130052200	C	T	0.378788	-0.1387	0.0241	8.529e-09	3483	0.009053551291287	31.803345262539
IL16	rs4778636	15	81591639	G	A	0.959596	0.7286	0.063	6.208e-31	3483	0.04116433661212	149.444854022731
IL17	rs1530455	3	122854899	T	C	0.393939	0.0736	0.0134	3.962e-08	12831	0.00258660993031354	33.2696744663454
IL17	rs62532933	9	13490256	C	G	0.0808081	-0.121	0.0221	4.372e-08	12831	0.00217501281683209	27.9640616195721
IL18	rs385076	2	32489851	C	T	0.671717	0.2471	0.0247	1.506e-23	3636	0.0269283795335666	100.565805400916
IL18	rs115267715	5	68535015	C	T	0.9747475	-0.4424	0.0794	2.536e-08	3636	0.00963511143889913	35.3546408736594
IL18	rs17229943	5	68682536	C	A	0.0959596	0.3076	0.0463	2.967e-11	3636	0.0164164378058909	60.653041876308
IL18	rs12420140	11	112071294	G	A	0.742424	0.2479	0.0261	1.835e-21	3636	0.0235039279130589	87.4691424549337
IL1a	rs3002096	13	20089106	G	T	0.969697	-0.175117	0.0267929	6.32113e-11	5014	0.00180222201543268	9.04904512969998
IL1b	rs2451078	13	20098289	C	G	0.969697	-0.2051	0.025	2.325e-16	8376	0.00247219653985977	20.7534805074864
IL2ra	rs12722497	10	6095928	C	A	0.863636	-0.6285	0.0482	6.941e-39	3677	0.0930402843452179	376.999153398807
IL4	rs2497180	13	20087058	A	G	0.969697	-0.1959	0.0252	7.616e-15	13183	0.0022553842613753	29.7954200706763
IL5	rs9472168	6	43928985	G	A	0.464646	-0.1567	0.0252	5.476e-10	3364	0.0122160624249104	41.5783252898124
IL7	rs6921438	6	43925607	G	A	0.515152	0.3206	0.0246	6.915e-39	3409	0.0513449848951771	184.400399252134
IP10	rs113831257	4	76159521	A	G	0.0353535	0.2177	0.0374	5.855e-09	8757	0.00323256645686359	28.3929012700995
IP10	rs10774624	12	111833788	A	G	0.651515	-0.1191	0.0156	2.265e-14	8757	0.00644112944304894	56.7576717847451
MCP1	rs12075	1	159175354	A	G	0.545455	0.1489	0.0122	3.522e-34	13365	0.0109939865974115	148.545752917892
MCP1	rs1896564	3	42924955	T	C	0.434343	0.0714	0.0126	1.517e-08	13365	0.00250502700341413	33.5587414000307
MCP1	rs1500003	3	46033819	A	G	0.378788	0.0953	0.0128	1.037e-13	13365	0.00427417052915837	57.3609110968793
MCP1	rs12495098	3	46342502	T	G	0.888889	-0.2808	0.0238	4.735e-32	13365	0.015575026371838	211.421980326036
MCSF	rs56367447	8	3871527	C	T	0.9747475	0.4878	0.0876	2.569e-08	840	0.0117141315645385	9.93279633414524
MIF	rs2330634	22	24250795	G	C	0.626263	-0.1549	0.0248	4.498e-10	3494	0.0112319634211831	39.6675608593513
MIG	rs55876513	4	76883698	G	T	0.292929	-0.1638	0.0254	1.048e-10	3685	0.0111143273744688	41.3941356956734
MIG	rs191555775	6	161005389	T	A	0.136364	-0.2279	0.0412	3.278e-08	3685	0.0122334546203023	45.6138280622309
MIP1b	rs79068918	3	45344715	G	C	0.9090909	-0.2674	0.0271	4.738e-23	8243	0.0118186390802063	98.5622766344464
MIP1b	rs113010081	3	46457412	C	T	0.156566	0.5799	0.0235	6.36e-134	8243	0.0888146836916115	803.263392421541
MIP1b	rs141102180	17	34436204	G	T	0.959596	-0.3296	0.0391	3.439e-17	8243	0.00842397740157862	70.0117753800554
MIP1b	rs113877493	17	34812273	C	T	0.858586	0.6069	0.0217	1.3e-172	8243	0.0894417895688774	809.492220698475
MIP1b	rs1564708	17	34825482	C	T	0.676768	0.1696	0.0187	1.162e-19	8243	0.0125844968521807	105.030595760552
MIP1b	rs117453826	17	35132809	G	A	0.0151515	0.5906	0.059	1.351e-23	8243	0.0104097892912142	86.6894929037872
MIP1b	rs3760440	17	35228301	G	A	0.338384	-0.1242	0.0162	1.596e-14	8243	0.00690699285132614	57.3164121366703
PDGFbb	rs13412535	2	224874874	G	A	0.782828	-0.3318	0.0214	2.003e-54	8293	0.0374328540501945	322.425084043276
PDGFbb	rs55680718	2	225166877	C	T	0.853535	0.1359	0.0245	2.858e-08	8293	0.00461768282849952	38.4628174226377
PDGFbb	rs2324229	6	83918131	C	T	0.393939	-0.0884	0.0161	3.888e-08	8293	0.0037314690337442	31.0534848759778
PDGFbb	rs4965869	15	101990320	C	T	0.772727	-0.1843	0.0181	1.903e-24	8293	0.0119303888247358	100.109195371599
RANTES	rs74472919	13	82200650	C	T	0.969697	-0.3546	0.0599	3.301e-09	3421	0.00738973961804208	25.4536153438145
SCF	rs1557570	1	169507844	G	T	0.727273	-0.1173	0.0169	3.965e-12	8290	0.00545822733240539	45.4860613945229
SCF	rs4841899	9	137424412	C	T	0.242424	0.1002	0.0178	1.65e-08	8290	0.00368779914518626	30.6776121873044
SCGFb	rs4656185	1	169476326	G	A	0.732323	-0.2105	0.0254	1.152e-16	3682	0.0173719242307359	65.0588790871465
SCGFb	rs17876031	5	176831119	G	A	0.60101	0.1497	0.0253	3.473e-09	3682	0.0107477438025744	39.9814071140014
SCGFb	rs117716477	12	104240958	C	A	0.979798	-0.824	0.0839	9.595e-23	3682	0.0268791378419667	101.647422334651
SCGFb	rs116924815	19	51230733	C	T	0.9646465	-0.6044	0.0736	2.166e-16	3682	0.0249160684529337	94.0340917743554
SeSelectin	rs13065271	3	98434493	T	C	0.459596	-0.107776	0.0197504	4.84604e-08	5199	0.00576990832785004	30.1602353730858
SeSelectin	rs74336249	9	135625608	T	C	0.0151515	-0.396099	0.071965	3.71156e-08	5199	0.00468233568219564	24.4485749753567
SeSelectin	rs35163606	9	136003423	T	C	0.186869	-0.225178	0.0233243	4.71669e-22	5199	0.0154091857597411	81.3348420837828
SeSelectin	rs635634	9	136155000	T	C	0.176768	-0.891371	0.0239653	8.44044e-303	5199	0.231245286202369	1563.28375075183
SeSelectin	rs118167234	9	136504635	C	A	0.040404	-0.525514	0.0600455	2.09744e-18	5199	0.021414669088956	113.727471422133
SeSelectin	rs12115818	9	136745163	A	G	0.0505051	-0.404696	0.0473929	1.35198e-17	5199	0.0157078118680693	82.9362452152412
SeSelectin	rs35166255	11	126301756	A	G	0.030303	0.330287	0.0474323	3.32315e-12	5199	0.00641113075120903	33.5336350327919
sICAM	rs2519093	9	136141870	T	C	0.176768	-0.349716	0.0239865	3.78263e-48	5199	0.0355948274683231	191.813901067395
sICAM	rs76925168	19	9000666	A	G	0.010101	-0.467969	0.074545	3.43679e-10	5199	0.004379448481515	22.860108425565
sICAM	rs117960796	19	10383403	A	G	0.0151515	-0.955795	0.0802119	9.78365e-33	5199	0.0272636854292024	145.660618456588
sICAM	rs76195573	19	10406649	A	G	0.0555556	0.316451	0.0402319	3.67157e-15	5199	0.0105086560717577	55.1934950619289
sICAM	rs78341426	19	11656300	A	G	0.020202	-0.3997	0.0682959	4.84293e-09	5199	0.00632454384360418	33.0778567102272
sVCAM	rs8176741	9	136131461	A	G	0.156566	0.249779	0.0285539	2.17906e-18	5199	0.0164774651223404	87.0680469476532
sVCAM	rs117238625	12	104448391	A	G	0.020202	0.494177	0.06596	6.77972e-14	5199	0.00966776239603155	50.7338439206381
sVCAM	rs34931250	17	66879927	T	C	0.0707071	-0.325844	0.041951	8.0208e-15	5199	0.0139529197666261	73.5394135643032
TNFb	rs147378920	1	22701995	G	A	0.010101	1.4926	0.1664	2.995e-19	1559	0.0445525049235968	72.6028908166148
TRAIL	rs79287178	3	172294500	G	A	0.9646465	0.4304	0.042	1.068e-24	8186	0.0126349965985875	104.72805072756
TRAIL	rs57396456	18	27945877	C	T	0.010101	0.5641	0.0515	7.014e-28	8186	0.00636352056193146	52.4125808145644
TRAIL	rs74778900	18	28086266	C	T	0.989899	-0.5791	0.053	9.024e-28	8186	0.00670644523015798	55.2561199053894
TRAIL	rs141050423	18	28858513	G	A	0.979798	-0.6562	0.0478	6.39e-43	8186	0.0170464270066922	141.927312190276
TRAIL	rs62093514	18	29230977	C	T	0.979798	-1.0459	0.0548	4.302e-81	8186	0.0433053184976436	370.453325849122
TRAIL	rs28521641	18	29572759	T	A	0.0606061	0.7005	0.0445	6.094e-56	8186	0.0558740752973344	484.335214476178
TRAIL	rs138987090	18	30366247	G	A	0.010101	0.7263	0.0748	2.753e-22	8186	0.0105491469138589	87.2546807895925
VEGF	rs9381249	6	43734798	T	C	0.9494949	-0.2415	0.0395	9.721e-10	12155	0.00559360941420912	68.3615228687719
VEGF	rs13201415	6	43931712	A	T	0.439394	0.4523	0.0189	1.45e-126	12155	0.100784799227	1362.11850506176
VEGF	rs4507572	6	44135095	T	C	0.525253	0.0731	0.013	1.876e-08	12155	0.00266498961008873	32.4741620358302
VEGF	rs6475938	9	2687795	A	T	0.510101	0.1259	0.017	1.303e-13	12155	0.00792217047733938	97.0469603755078
VEGF	rs7896518	10	65104500	A	G	0.656566	-0.0728	0.0133	4.408e-08	12155	0.00239009097315835	29.1163663612046
BMI	rs79113395	1	1590521	A	G	0.266	-0.02	0.0022	2.033e-20	484680	0.0001561952	75.7162036531729
BMI	rs10909880	1	2727804	T	C	0.4522	-0.0135	0.0016	2.205e-16	775594	9.029217582e-05	70.0362129506389
BMI	rs11121210	1	8708529	T	C	0.3445	-0.0111	0.0017	2.365e-10	718632	5.5646502795e-05	39.991471689112
BMI	rs10779751	1	11284336	A	G	0.2787	0.0131	0.0018	2.657e-13	806531	6.89962501182e-05	55.6513163437236
BMI	rs61740466	1	19934900	A	G	0.2346	-0.0142	0.0022	2.24e-10	484680	7.24141021152e-05	35.1000639246042
BMI	rs4655141	1	23312025	T	C	0.8362	-0.0173	0.0022	6.198e-15	718666	8.19872392248e-05	58.9261084792041
BMI	rs2228552	1	32165495	T	G	0.5663	0.0124	0.0019	1.795e-11	588348	7.55282374112e-05	44.4400928498132
BMI	rs4653017	1	33776728	T	C	0.6679	0.0118	0.0018	1.11e-10	716691	6.17695346232e-05	44.2722806777408
BMI	rs7512146	1	34283008	T	G	0.5272	-0.0097	0.0017	1.286e-08	716980	4.69057769088e-05	33.6319876510274
BMI	rs11577094	1	38026600	T	C	0.0791	0.0186	0.003	3.275e-10	791496	5.04016600248e-05	39.8946222548567
BMI	rs112646560	1	39560250	T	C	0.2119	0.018	0.0023	1.29e-14	484680	0.00010821495672	52.4550852179128
BMI	rs2984618	1	47690438	T	G	0.4408	0.0165	0.0016	3.803e-24	806433	0.00013421672352	108.251055666966
BMI	rs657452	1	49589847	A	G	0.4042	0.0188	0.0016	3.172e-30	798331	0.0001702325098368	135.924688146315
BMI	rs587271	1	54743111	T	C	0.69	0.012	0.0018	6.208e-11	789324	6.16032e-05	48.6277566558188
BMI	rs79906980	1	57887985	T	C	0.1555	0.0158	0.0026	1.691e-09	484680	6.556532478e-05	31.7801541598499
BMI	rs12140153	1	62579891	T	G	0.0911	-0.0353	0.0034	1.443e-25	484680	0.0002063544728222	100.036116078515
BMI	rs2503185	1	66461401	A	G	0.5097	0.013	0.0017	1.327e-14	717297	8.446819758e-05	60.593734026644
BMI	rs3101336	1	72751185	T	C	0.3825	-0.0254	0.0016	4.804e-54	801552	0.0003047655195	244.359274436443
BMI	rs6656785	1	75005776	A	G	0.6125	-0.0178	0.0016	3.056e-27	806090	0.0001503999875	121.253861703184
BMI	rs34517439	1	78450517	A	C	0.1168	0.0391	0.003	3.403e-39	484680	0.0003154172301312	152.92402713859
BMI	rs6696828	1	80812020	C	G	0.2976	0.012	0.0018	6.415e-11	718664	6.020186112e-05	43.2673946939078
BMI	rs321237	1	96478125	A	G	0.7498	0.0126	0.002	1.488e-10	718362	5.95667392992e-05	42.792911877199
BMI	rs11165643	1	96924097	T	C	0.5796	0.0185	0.0016	4.493e-30	805410	0.00016678789848	134.354716479792
BMI	rs12072739	1	98315893	A	G	0.7762	-0.0169	0.0023	1.502e-13	484680	9.92286597432e-05	48.0987211186466
BMI	rs17024393	1	110154688	T	C	0.9689	-0.0644	0.0049	7.105e-39	782554	0.0002499430558688	195.642337699983
BMI	rs197374	1	112289983	T	C	0.4027	0.0141	0.0017	3.155e-16	718653	9.56406161502e-05	68.7387986580145
BMI	rs17544384	1	115295160	T	C	0.7952	-0.0131	0.0023	2.276e-08	484680	5.58957658112e-05	27.0929623637202
BMI	rs7534091	1	118864616	A	G	0.7182	-0.012	0.0018	6.65e-11	803017	5.828796288e-05	46.8088369038311
BMI	rs74887628	1	147032779	A	G	0.0339	0.0305	0.0054	1.758e-08	484680	6.0932844795e-05	29.5346089772959
BMI	rs4970991	1	151004003	T	C	0.2151	0.0116	0.0021	1.811e-08	718232	4.54360651488e-05	32.6350278790755
BMI	rs61813324	1	156049877	T	C	0.1312	0.0289	0.0028	3.196e-24	484680	0.0001904054295552	92.3028977588522
BMI	rs1750307	1	156488420	A	T	0.3655	0.0129	0.0018	2.778e-13	718639	7.7184202995e-05	55.4717056271054
BMI	rs10733051	1	167280354	A	G	0.512	0.0093	0.0016	6.958e-09	794799	4.322009088e-05	34.3526832972454
BMI	rs61828641	1	174321997	A	G	0.1092	0.0223	0.003	2.492e-13	484680	9.67481275488e-05	46.8962260861602
BMI	rs543874	1	177889480	A	G	0.7786	-0.0479	0.002	3.06e-125	806688	0.0007910301527928	638.618116021706
BMI	rs10920678	1	190239907	A	G	0.425	0.0149	0.0016	7.148e-20	805921	0.0001085073875	87.4576550282765
BMI	rs2400414	1	194965200	T	C	0.3461	-0.0126	0.0018	5.521e-13	718698	7.18594721208e-05	51.648826632748
BMI	rs2820295	1	201800868	A	G	0.3266	0.0235	0.0018	5.556e-39	718545	0.00024291537998	174.587555879445
BMI	rs10920336	1	202115945	A	G	0.5327	-0.0101	0.0017	4.197e-09	704432	5.07868434542e-05	35.7775931654654
BMI	rs1006317	1	209552636	T	G	0.1268	0.016	0.0026	3.749e-10	717508	5.668954112e-05	40.677391873526
BMI	rs6661316	1	210095527	T	C	0.5893	0.012	0.0016	1.721e-13	806610	6.970334688e-05	56.2271964439609
BMI	rs10864728	1	230304914	A	G	0.3978	0.011	0.0019	1.196e-08	484680	5.797234872e-05	28.0995510298833
BMI	rs946824	1	243684019	T	C	0.1355	0.0197	0.0025	4.823e-15	717750	9.0921531155e-05	65.2646811081756
BMI	rs6710091	2	239597	C	G	0.6655	0.0103	0.0018	5.778e-09	718687	4.7233336755e-05	33.947494079187
BMI	rs77165542	2	430975	T	C	0.0341	-0.0939	0.0053	1.505e-70	484680	0.0005808282420798	281.678277413455
BMI	rs13021737	2	632348	A	G	0.1567	-0.0578	0.0021	2.89e-161	802967	0.0008829513385848	709.60556877356
BMI	rs10929925	2	6155557	A	C	0.4105	-0.0142	0.0016	3.045e-18	801209	9.758962638e-05	78.1971230110593
BMI	rs11902450	2	12845368	T	C	0.1052	0.0167	0.0027	1.061e-09	718624	5.25054824288e-05	37.7335760135615
BMI	rs10182181	2	25150296	A	G	0.5052	-0.0327	0.0016	2.45e-91	806439	0.0005345871727968	431.341465483276
BMI	rs935166	2	26949366	A	G	0.4948	-0.0152	0.0019	8.691e-16	484680	0.0001155075053568	55.9904139943675
BMI	rs10168563	2	35552173	A	G	0.7031	0.0126	0.0018	9.334e-12	718585	6.62824238328e-05	47.6325801679119
BMI	rs3770890	2	36657992	T	G	0.9725	-0.0297	0.0053	2.103e-08	771730	4.7180788875e-05	36.4124538052214
BMI	rs10185199	2	40282202	A	G	0.286	-0.0143	0.002	3.178e-13	706553	8.351535192e-05	59.0127838878421
BMI	rs10169594	2	41637688	T	C	0.6475	-0.012	0.0018	1.338e-11	718035	6.57342e-05	47.2024276424191
BMI	rs7561278	2	48954905	T	C	0.7668	0.0169	0.0021	4.89e-16	717019	0.0001021442808672	73.2466675627412
BMI	rs930295	2	50233352	A	C	0.1548	0.0208	0.0023	2.03e-19	716913	0.0001132106047488	81.1711172923437
BMI	rs805412	2	54120820	A	G	0.4337	-0.0098	0.0017	1.144e-08	718626	4.71756758648e-05	33.9031722977331
BMI	rs4671328	2	58935282	T	G	0.4496	0.0214	0.0017	3.422e-36	718386	0.0002266534166528	162.861101093708
BMI	rs6545714	2	59307725	A	G	0.6112	-0.0194	0.0016	4.013e-32	806783	0.0001788722860032	144.336579587892
BMI	rs2861685	2	67837553	T	C	0.5864	0.0165	0.0019	7.823e-18	484680	0.00013206032928	64.0151901418609
BMI	rs17020497	2	81826131	A	G	0.1341	0.014	0.0025	2.037e-08	718660	4.551793848e-05	32.7133196750323
BMI	rs12714199	2	86812549	T	C	0.6146	-0.0141	0.0017	3.219e-16	718671	9.41829929208e-05	67.6927728473443
BMI	rs4303732	2	100830040	T	C	0.6137	0.0169	0.0017	1.264e-22	718627	0.0001354204449182	97.3296976603024
BMI	rs264941	2	104297420	A	C	0.4679	-0.0124	0.0017	1.836e-13	718689	7.65631283168e-05	55.0291382035855
BMI	rs10197031	2	105454590	T	C	0.7262	-0.0161	0.0019	5.047e-18	718456	0.0001030792941752	74.065365822981
BMI	rs13033310	2	133523605	A	G	0.2519	0.0146	0.0022	3.395e-11	484680	8.03384649848e-05	38.9414150254104
BMI	rs4988235	2	136608646	A	G	0.7206	0.0124	0.0017	7.094e-13	796039	6.19147360128e-05	49.2894724560966
BMI	rs17814208	2	144037998	A	G	0.7575	-0.0129	0.002	7.239e-11	718642	6.1136953875e-05	43.9381467771829
BMI	rs1451077	2	147901207	A	G	0.5776	-0.0169	0.0019	1.426e-18	484680	0.0001393652502528	67.5566858164516
BMI	rs2119753	2	151224579	A	G	0.6229	0.01	0.0017	1e-08	718468	4.6979118e-05	33.7544847489101
BMI	rs11695013	2	157057487	T	C	0.632	-0.0104	0.0017	2.427e-09	718650	5.031084032e-05	36.1576038937232
BMI	rs3764835	2	159519368	A	G	0.1505	-0.013	0.0024	3.841e-08	718616	4.32132155e-05	31.0549636281526
BMI	rs12692596	2	161265910	T	C	0.3618	0.012	0.0017	1.032e-12	806739	6.649941888e-05	53.6511094565957
BMI	rs62176243	2	166190881	A	T	0.7571	0.0148	0.0022	2.411e-11	484680	8.05627323872e-05	39.0501299931356
BMI	rs56133507	2	172818467	T	G	0.8065	-0.0131	0.0024	4.305e-08	484680	5.3562140955e-05	25.9617819224103
BMI	rs34234296	2	175166636	A	G	0.3876	-0.0145	0.002	2.011e-13	484680	9.981250392e-05	48.3817538789365
BMI	rs7588437	2	181575281	A	G	0.3664	-0.0165	0.0017	2.321e-22	806379	0.00012640624128	101.943971978962
BMI	rs6716898	2	198944271	A	G	0.4873	0.0127	0.0019	2.33e-11	484680	8.05929710718e-05	39.0647883804978
BMI	rs7593917	2	203931012	A	G	0.4535	-0.0115	0.0016	9.671e-13	799252	6.5553084875e-05	52.3967378541475
BMI	rs4482463	2	205375909	A	C	0.917	-0.031	0.0031	4.848e-23	663850	0.000146285342	97.1254397441858
BMI	rs11692326	2	208263279	T	C	0.2302	0.0147	0.0019	1.685e-14	801583	7.65857361528e-05	61.3943729043421
BMI	rs73985439	2	212299249	A	C	0.6914	-0.0131	0.0021	1.839e-10	484680	7.32314922488e-05	35.4962926466437
BMI	rs7599312	2	213413231	A	G	0.2737	-0.0182	0.0018	1.521e-23	806704	0.0001316932796088	106.251224619211
BMI	rs12987009	2	219658170	A	T	0.5851	-0.0109	0.0017	1.834e-10	717653	5.76841535838e-05	41.3994785974494
BMI	rs6725931	2	220205146	T	C	0.8483	0.0187	0.0024	2.297e-15	718689	9.00011909918e-05	64.6885079930866
BMI	rs4973618	2	229002620	A	G	0.6623	-0.0148	0.0018	1.252e-16	706944	9.79804076768e-05	69.2732527854014
BMI	rs6720868	2	230663576	T	C	0.3083	0.0154	0.0018	1.824e-17	718504	0.0001011492664952	72.6833021380319
BMI	rs7568228	2	236848488	C	G	0.5401	-0.0104	0.0017	1.004e-09	712598	5.37321552768e-05	38.2913763998091
BMI	rs59302296	3	9507314	A	T	0.0991	0.0217	0.0032	9.124e-12	484680	8.40813555582e-05	40.7558100529934
BMI	rs6783054	3	11672805	A	C	0.5028	0.0099	0.0017	6.22e-09	718613	4.90034632032e-05	35.2161534093925
BMI	rs10510419	3	12426936	T	G	0.1467	-0.0168	0.0023	2.233e-13	800535	7.06611040128e-05	56.5705429156958
BMI	rs2600226	3	12928762	T	C	0.6712	-0.0116	0.0018	1.423e-10	718538	5.93922435072e-05	42.6779998228473
BMI	rs1048637	3	13358171	T	G	0.5474	-0.0094	0.0017	2.944e-08	718169	4.37829525728e-05	31.4448484486583
BMI	rs4858193	3	20441050	T	C	0.7199	0.0133	0.0019	2.444e-12	718071	7.13376107822e-05	51.2289813898987
BMI	rs6804842	3	25106437	A	G	0.4301	-0.0141	0.0016	7.57e-18	806143	9.74622247038e-05	78.5759534721797
BMI	rs11921432	3	35117776	T	C	0.8906	-0.0189	0.0027	5.382e-12	706646	6.96071122488e-05	49.1908722625082
BMI	rs1799923	3	42306294	A	G	0.1117	-0.0224	0.0026	1.124e-17	718667	9.95723753472e-05	71.5663071560938
BMI	rs28350	3	42418446	A	G	0.1717	0.0172	0.0022	1.074e-14	717783	8.41482030048e-05	60.4050642785998
BMI	rs4017425	3	44028764	T	C	0.4676	-0.0118	0.0017	2.911e-12	718438	6.93276628352e-05	49.8109420528659
BMI	rs11919665	3	48085349	A	T	0.3249	0.0117	0.002	7.297e-09	484680	6.00509024622e-05	29.1070992111499
BMI	rs11713193	3	49924424	A	G	0.5156	0.0246	0.0017	3.02e-48	718286	0.0003022854565248	217.19246097668
BMI	rs2365389	3	61236462	T	C	0.3999	-0.0168	0.0016	6.494e-25	801448	0.0001354639047552	108.581713513334
BMI	rs6445258	3	62112198	T	C	0.207	0.0131	0.0023	2.477e-08	484680	5.633990622e-05	27.308251611232
BMI	rs925018	3	62713143	C	G	0.6665	-0.013	0.0017	4.328e-14	806677	7.51298795e-05	60.6099491638397
BMI	rs11915371	3	70539559	A	C	0.8019	-0.0154	0.0021	2.288e-13	718311	7.53487629048e-05	54.1277729941179
BMI	rs12636480	3	82719412	T	G	0.3507	0.0128	0.0018	6.96e-13	718231	7.46158522368e-05	53.5952679927818
BMI	rs9827823	3	84221774	T	C	0.8552	0.0182	0.0023	3.39e-15	718678	8.20368593408e-05	58.9627590431788
BMI	rs9818122	3	85861064	T	C	0.7933	-0.0228	0.002	3.966e-30	806655	0.0001704816423648	137.542976811076
BMI	rs34184235	3	86192846	T	C	0.4353	-0.0115	0.0019	2.143e-09	484680	6.5017779195e-05	31.514736202834
BMI	rs11128021	3	88139016	A	G	0.1615	-0.0181	0.0024	1.634e-14	718699	8.8728418155e-05	63.7745065538292
BMI	rs1492014	3	94071481	T	C	0.5674	-0.0171	0.0017	1.442e-23	718371	0.0001435483030968	103.135455867024
BMI	rs1436344	3	104606144	C	G	0.5703	0.0147	0.0017	1.07e-17	718660	0.0001059091275438	76.1205036385008
BMI	rs7640424	3	107820063	T	C	0.3106	-0.0135	0.0018	1.226e-14	805792	7.804952478e-05	62.8964356093859
BMI	rs17681451	3	114399296	A	G	0.0762	-0.0225	0.0031	7.37e-13	718679	7.12734795e-05	51.2262615005204
BMI	rs6808814	3	116852469	T	C	0.7335	0.0118	0.0019	1.305e-09	718249	5.443664382e-05	39.1010846456014
BMI	rs7631156	3	131751628	A	G	0.3091	0.0215	0.0018	3.329e-32	718695	0.000197433622155	141.922182417982
BMI	rs687339	3	135932359	T	C	0.7697	0.0188	0.0019	4.317e-22	806723	0.0001253028989408	101.097147702103
BMI	rs16851483	3	141275436	T	G	0.0717	0.0352	0.0034	4.869e-25	718609	0.0001649387993088	118.545728545028
BMI	rs355777	3	154034950	C	G	0.3984	0.0151	0.0017	2.129e-18	718342	0.0001092977061888	78.5214964831147
BMI	rs9826775	3	156295341	A	G	0.8513	0.0155	0.0024	6.614e-11	715852	6.0825682955e-05	43.5447137802915
BMI	rs2047648	3	157033438	A	T	0.7465	-0.0133	0.002	7.947e-12	718280	6.6948531195e-05	48.0908767032414
BMI	rs3732927	3	170586057	T	C	0.2907	0.0099	0.0017	1.13e-08	806737	4.04180518302e-05	32.6079749940598
BMI	rs12635553	3	171113714	A	T	0.486	0.0099	0.0017	4.102e-09	714859	4.896658008e-05	35.0058166513729
BMI	rs39654	3	173095123	A	G	0.4513	-0.0163	0.0017	1.745e-21	717812	0.0001315847313678	94.4652662097983
BMI	rs6443750	3	181329682	T	C	0.1994	-0.0152	0.0021	7.252e-13	792002	7.37662848512e-05	58.4272075601863
BMI	rs865809	3	183997735	A	G	0.2246	0.0124	0.002	6.502e-10	718234	5.35560963968e-05	38.4677624104583
BMI	rs9816226	3	185834499	A	T	0.1755	-0.0315	0.0021	1.447e-50	794122	0.000287156653875	228.102343080795
BMI	rs7616009	3	194881756	A	G	0.1595	-0.0157	0.0024	4.331e-11	718569	6.6088775555e-05	47.4923518956147
BMI	rs6803161	3	196205694	T	C	0.3945	0.0107	0.0019	2.705e-08	484680	5.4696395355e-05	26.5115895962567
BMI	rs2051559	4	3298800	T	C	0.8588	-0.0167	0.0025	3.775e-11	718374	6.76378307168e-05	48.5924104129187
BMI	rs12642970	4	16601492	C	G	0.44	-0.0109	0.0019	1.709e-08	484680	5.8549568e-05	28.379349117735
BMI	rs994596	4	18459828	T	C	0.3247	0.013	0.0018	1.055e-12	718470	7.411322958e-05	53.2519305024343
BMI	rs34811474	4	25408838	A	G	0.2224	-0.0293	0.0023	8.504e-38	484680	0.0002969314993152	143.958911160423
BMI	rs73213484	4	28489339	A	T	0.8565	0.0208	0.0027	2.043e-14	484680	0.00010634961792	51.5508025223815
BMI	rs337637	4	38604470	A	G	0.359	-0.0137	0.0017	6.237e-16	806528	8.638207022e-05	69.6754042719202
BMI	rs10938397	4	45182527	A	G	0.57	-0.0322	0.0016	2.42e-86	805635	0.000508258968	409.678419897653
BMI	rs2271046	4	52752812	A	T	0.6948	-0.0115	0.0018	3.031e-10	718692	5.608800792e-05	40.3121514402941
BMI	rs1492767	4	55221467	T	C	0.4681	0.0095	0.0016	3.546e-09	806046	4.4941321395e-05	36.2263105207754
BMI	rs2192158	4	55505360	A	G	0.4492	0.0137	0.0017	7.417e-16	718510	9.28762793568e-05	66.7385481561381
BMI	rs1346841	4	65651730	A	G	0.4116	-0.0126	0.0017	3.183e-13	718293	7.68987209088e-05	55.2399070184957
BMI	rs10002111	4	67815504	A	G	0.2227	0.0125	0.0021	1.257e-09	718668	5.4095221875e-05	38.8784998650951
BMI	rs10033843	4	77028783	A	G	0.215	0.014	0.0021	1.073e-11	714618	6.61598e-05	47.2819798031274
BMI	rs72649373	4	80609966	T	C	0.8619	-0.0167	0.0028	3.203e-09	484680	6.63916553742e-05	32.1807112741491
BMI	rs4148155	4	89054667	A	G	0.8867	0.0192	0.0026	1.339e-13	806326	7.40694417408e-05	59.7283925909041
BMI	rs4286488	4	94440026	A	G	0.7608	0.0121	0.002	1.704e-09	718676	5.32883674752e-05	38.2990050983295
BMI	rs7678054	4	95093855	A	G	0.4788	-0.0099	0.0017	4.574e-09	717910	4.89169007712e-05	35.1195523385075
BMI	rs3796432	4	96030402	T	G	0.3672	-0.0113	0.0018	2.214e-10	718567	5.93411591808e-05	42.6430105324275
BMI	rs13107325	4	103188709	T	C	0.082	0.0468	0.0032	3.805e-47	806141	0.00032974501248	265.907996451223
BMI	rs326893	4	112691776	T	C	0.5812	0.0121	0.0017	1.893e-12	718672	7.12743088992e-05	51.2263586999018
BMI	rs7696649	4	120322177	A	G	0.278	0.0116	0.0019	4.725e-10	718653	5.401668992e-05	38.8212452228634
BMI	rs4864201	4	130731284	T	C	0.3471	0.0137	0.0017	4.298e-16	806465	8.50692124542e-05	68.6110089679501
BMI	rs1296328	4	137083193	A	C	0.4464	0.0166	0.0017	3.486e-22	717741	0.0001361966542848	97.7669659833846
BMI	rs17367750	4	140782542	T	C	0.3117	-0.0122	0.0018	1.969e-11	718303	6.38651929848e-05	45.8773619527496
BMI	rs9992189	4	144060728	C	G	0.6083	-0.0097	0.0017	2.043e-08	718697	4.48378574798e-05	32.2261889347114
BMI	rs3914628	4	147438019	T	C	0.8593	0.0165	0.0023	6.914e-13	806780	6.5831961195e-05	53.1152746716808
BMI	rs750090	4	152931436	T	C	0.6258	0.0113	0.0018	2.496e-10	718676	5.98034480568e-05	42.9817536858466
BMI	rs13110266	4	162129844	A	G	0.4037	-0.0124	0.0016	3.956e-14	806749	7.40281548512e-05	59.7264132779119
BMI	rs7685628	4	165310133	A	T	0.4014	0.0101	0.0017	6.145e-09	718680	4.90215257208e-05	35.2324192089176
BMI	rs1522569	4	171632637	T	G	0.8183	0.0141	0.0022	1.599e-10	718485	5.91201734382e-05	42.4793509589945
BMI	rs1437842	4	173597016	A	G	0.4907	-0.0106	0.0017	8.494e-10	705988	5.61605639672e-05	39.6507987241658
BMI	rs6850421	4	180187034	A	G	0.4564	0.0113	0.0019	3.657e-09	484680	6.33595328352e-05	30.7109174848838
BMI	rs35408866	4	187743245	A	G	0.1339	0.0159	0.0028	1.502e-08	484680	5.86371508398e-05	28.4218035683156
BMI	rs698147	5	3513485	A	G	0.447	0.0116	0.0017	9.672e-12	716805	6.652404192e-05	47.6878052059343
BMI	rs6890310	5	27193573	A	G	0.2923	-0.0119	0.0019	3.287e-10	718622	5.85870902862e-05	42.1043215911596
BMI	rs7730004	5	43191033	T	C	0.6614	0.0139	0.0018	1.461e-14	718548	8.65387744568e-05	62.187471858437
BMI	rs116374395	5	50723410	A	G	0.0348	0.0321	0.0052	7.047e-10	484680	6.92208005472e-05	33.552121672338
BMI	rs150215901	5	50935903	A	T	0.0414	-0.0275	0.0049	1.54e-08	484680	6.00251355e-05	29.0946090317184
BMI	rs4865796	5	53272664	A	G	0.7044	-0.0096	0.0018	4.211e-08	800901	3.83792283648e-05	30.7390653597491
BMI	rs13186194	5	60795485	T	C	0.6169	0.01	0.0017	2.197e-09	806614	4.7266878e-05	38.1278331809754
BMI	rs4700608	5	63026280	T	C	0.5236	-0.0155	0.0017	4.324e-20	718693	0.00011985738072	86.1507466098732
BMI	rs10050620	5	63927239	T	C	0.3308	-0.013	0.002	1.198e-10	484680	7.482351968e-05	36.2680275729379
BMI	rs1159692	5	63977815	A	C	0.4752	0.0135	0.0017	5.543e-15	717639	9.090081792e-05	65.2397206136197
BMI	rs2112347	5	75015242	T	G	0.6298	0.0276	0.0017	1.173e-61	806699	0.0003552116740992	286.650013291904
BMI	rs10942267	5	80841914	A	G	0.6927	0.0148	0.0018	6.532e-16	718640	9.32526483168e-05	67.0211465805004
BMI	rs2962334	5	86879056	T	G	0.0272	0.0396	0.0059	1.777e-11	715204	8.29875290112e-05	59.3577726787505
BMI	rs1501673	5	87963600	A	G	0.1355	0.0289	0.0025	2.725e-31	718652	0.000195672581195	140.647621358897
BMI	rs12652212	5	88808594	A	G	0.5611	-0.0131	0.0016	1.633e-15	806515	8.45236876638e-05	68.1752153294012
BMI	rs7713317	5	95716722	A	G	0.7198	-0.0166	0.0018	1.959e-20	802425	0.0001111542685152	89.2026568608453
BMI	rs6882366	5	95864693	T	C	0.3959	-0.0131	0.0017	4.387e-14	718668	8.20855900718e-05	58.9969654752637
BMI	rs11739877	5	105876806	T	C	0.6231	0.0116	0.0018	4.006e-11	718632	6.32018604768e-05	45.4216237255681
BMI	rs6888194	5	106910657	T	C	0.8443	-0.0127	0.0023	3.583e-08	718692	4.24055635758e-05	30.477746912326
BMI	rs40067	5	107439012	A	G	0.1701	-0.0252	0.0023	9.728e-29	714059	0.0001792921005792	128.047737411097
BMI	rs459552	5	112176756	A	T	0.7747	-0.0133	0.0019	8.356e-12	797086	6.17487293598e-05	49.2219635867349
BMI	rs6893539	5	122705737	A	C	0.6981	-0.0122	0.0019	6.165e-11	718648	6.27379621752e-05	45.0892143707845
BMI	rs6864049	5	124330522	A	G	0.489	-0.0121	0.0016	1.475e-13	806604	7.316956878e-05	59.0230392074125
BMI	rs6886072	5	136598460	T	C	0.4665	-0.01	0.0017	4.125e-09	718327	4.977555e-05	35.7568017682243
BMI	rs13174863	5	139080745	A	G	0.8542	-0.0197	0.0023	1.939e-17	793550	9.66672889848e-05	76.7175499168781
BMI	rs17405603	5	144608340	A	T	0.7062	-0.0125	0.0019	4.427e-11	716852	6.48379875e-05	46.4821251468242
BMI	rs2910026	5	152529936	T	C	0.7222	-0.0132	0.0021	5.688e-10	484680	6.99145527168e-05	33.8884148750415
BMI	rs7715256	5	153537893	T	G	0.5644	-0.0158	0.0016	3.978e-22	806764	0.0001227493060992	99.0416329789259
BMI	rs7734385	5	158460212	A	G	0.4449	-0.0101	0.0016	6.084e-10	805693	5.03855932398e-05	40.5972645202245
BMI	rs4921301	5	159984492	T	C	0.2127	-0.0129	0.0024	4.033e-08	484680	5.57336078622e-05	27.0143591991376
BMI	rs2861089	5	164557954	A	T	0.3806	0.0105	0.0017	1.549e-09	718566	5.198147262e-05	37.3539566053902
BMI	rs7727781	5	165185571	T	C	0.5164	0.0093	0.0017	4.272e-08	718539	4.31984752992e-05	31.0410437718239
BMI	rs2053682	5	170599327	A	C	0.6784	0.017	0.0018	2.591e-20	717007	0.00012610424832	90.4287800200125
BMI	rs6556301	5	176527577	T	G	0.3707	-0.0113	0.0017	8.137e-11	767716	5.95754320238e-05	45.7396181782332
BMI	rs2228213	6	12124855	A	G	0.3374	-0.0144	0.0017	5.498e-17	806782	9.27153174528e-05	74.8077996434619
BMI	rs11757278	6	13180454	T	C	0.6961	0.0133	0.0019	6.916e-13	718346	7.48403158062e-05	53.765115615721
BMI	rs3806114	6	20482335	A	G	0.6916	-0.012	0.0018	1.459e-11	804965	6.142735872e-05	49.4497885272258
BMI	rs2066295	6	26168903	A	G	0.7577	0.0142	0.002	2.285e-12	718598	7.40384615288e-05	53.2076817156453
BMI	rs3115667	6	31643399	T	C	0.2821	-0.0179	0.0019	5.924e-21	717285	0.0001297786036638	93.1000685686813
BMI	rs2281819	6	33771673	A	T	0.2293	-0.0154	0.002	2.088e-14	717097	8.38225466232e-05	60.1137679598811
BMI	rs2744974	6	34579431	T	C	0.3239	0.0261	0.0017	1.275e-51	804150	0.0002983547072718	239.992944167808
BMI	rs2436728	6	40365601	A	G	0.4073	0.0189	0.0017	1.969e-29	718640	0.0001724657817582	123.961843647422
BMI	rs1358980	6	43764551	T	C	0.4735	-0.0129	0.0017	5.151e-15	797930	8.2971277155e-05	66.2105988156798
BMI	rs2206277	6	50798526	T	C	0.1557	0.0408	0.0021	1.822e-83	806768	0.0004376588588928	353.242886832272
BMI	rs1327259	6	51177811	A	G	0.6096	0.0157	0.0017	1.465e-19	718295	0.0001173232453632	84.282354160986
BMI	rs6915002	6	54028069	T	C	0.4113	0.0099	0.0017	8.71e-09	718487	4.74627754062e-05	34.1029108065199
BMI	rs9370410	6	55171842	A	G	0.7293	0.0105	0.0019	2.584e-08	717054	4.3531442955e-05	31.2156670968002
BMI	rs2622274	6	64240516	T	G	0.4553	-0.0107	0.0017	3.23e-10	718675	5.67874773518e-05	40.8139444317952
BMI	rs1293037	6	70248345	T	C	0.7544	0.0129	0.0022	5.726e-09	484680	6.16651026048e-05	29.889561743181
BMI	rs6921533	6	73742334	T	C	0.2933	0.0104	0.0018	1.374e-08	717993	4.48377517952e-05	32.1945457802403
BMI	rs9294260	6	83433228	A	G	0.4689	0.014	0.0016	8.161e-18	806412	9.762085368e-05	78.7301183174493
BMI	rs6909685	6	97753952	T	C	0.3295	-0.0149	0.0018	2.782e-16	717696	9.8097227595e-05	70.4106987559069
BMI	rs9320823	6	98429337	T	C	0.4118	-0.0165	0.0017	2.073e-21	718696	0.00013188920382	94.8004826103843
BMI	rs57989773	6	100629078	T	C	0.7576	-0.0142	0.0023	5.63e-10	484680	7.40592425472e-05	35.8975441042175
BMI	rs156201	6	104847441	C	G	0.7459	0.0124	0.0019	1.646e-10	718454	5.82852465888e-05	41.8775928280411
BMI	rs768023	6	108876002	A	G	0.6033	0.0161	0.0016	1.127e-22	806650	0.0001240729972062	100.095654218213
BMI	rs2357760	6	120213880	A	G	0.6735	0.0143	0.0017	2.106e-16	806795	8.9933781795e-05	72.5644716130896
BMI	rs2875762	6	124925032	C	G	0.252	0.0129	0.002	1.066e-10	717481	6.273523872e-05	45.0140403081514
BMI	rs1268065	6	126042783	A	G	0.5	-0.01	0.0016	7.119e-10	786277	5e-05	39.3157157857893
BMI	rs9375702	6	130384187	T	C	0.6785	-0.0106	0.0018	5.522e-09	718509	4.901991518e-05	35.2228788187684
BMI	rs2246012	6	131898208	T	C	0.8512	-0.0161	0.0022	1.154e-13	806786	6.56623306752e-05	52.9787965027153
BMI	rs6922607	6	142703483	A	G	0.808	-0.013	0.0022	1.851e-09	706729	5.2435968e-05	37.0598576262446
BMI	rs765875	6	143185683	T	C	0.4689	-0.0132	0.0017	1.077e-14	718653	8.67829466592e-05	62.3720642311039
BMI	rs7760482	6	147354276	A	G	0.6159	-0.0102	0.0018	6.248e-09	718645	4.92249008952e-05	35.3768718770413
BMI	rs12527426	6	153392002	A	G	0.3	0.015	0.0019	5.544e-16	717888	9.45e-05	67.8466385073389
BMI	rs9478496	6	154333183	T	C	0.8453	-0.0157	0.0023	8.169e-12	718366	6.44659642718e-05	46.3130135712255
BMI	rs13191362	6	163033350	A	G	0.8572	0.0235	0.0025	4.079e-21	806582	0.00013519981272	109.064210404519
BMI	rs9458814	6	163771305	T	C	0.7708	-0.0112	0.002	2.328e-08	718448	4.43223072768e-05	31.844595799748
BMI	rs6950388	7	1270699	A	G	0.7782	0.0135	0.0022	1.588e-09	484680	6.291443502e-05	30.4951611224564
BMI	rs4721089	7	1872921	T	C	0.783	0.0167	0.0023	5.596e-13	484680	9.477295758e-05	45.9387212824426
BMI	rs6463489	7	5542513	T	C	0.0959	0.0167	0.0026	2.504e-10	805923	4.83613053182e-05	38.9772765353201
BMI	rs4307239	7	24354300	A	G	0.5361	-0.0115	0.0017	1.473e-11	717563	6.5780300955e-05	47.2044836587122
BMI	rs213518	7	26941065	T	C	0.8498	-0.0153	0.0024	2.492e-10	718433	5.97584764728e-05	42.9349077355039
BMI	rs215669	7	32378979	A	G	0.6024	-0.0149	0.0017	8.938e-18	718120	0.0001063491128448	76.3793350924088
BMI	rs2108719	7	39481056	A	G	0.727	0.0107	0.0019	2.279e-08	718577	4.544588958e-05	32.6577642660973
BMI	rs217433	7	44553496	T	C	0.8031	-0.0115	0.0021	3.002e-08	805664	4.1825488155e-05	33.6986158989937
BMI	rs2289379	7	44804225	T	C	0.3917	-0.0137	0.0018	7.019e-15	715836	8.94422092718e-05	64.0315015508314
BMI	rs10499694	7	50614173	A	G	0.4935	0.013	0.0016	1.285e-15	806696	8.44857195e-05	68.1598815429662
BMI	rs11772246	7	71603692	T	C	0.8234	0.0145	0.0022	3.689e-11	718345	6.114593102e-05	43.9264374496141
BMI	rs17207196	7	75101065	T	C	0.42	-0.022	0.0017	1.576e-36	694986	0.0002358048	163.919216061159
BMI	rs17149254	7	76634463	T	C	0.2051	0.0238	0.0023	2.993e-25	654047	0.0001846979465912	120.823084253804
BMI	rs6973656	7	77422583	A	G	0.5836	-0.0101	0.0017	6.31e-09	718650	4.95791123808e-05	35.6316965421243
BMI	rs1965529	7	77825707	A	G	0.773	0.0161	0.0022	7.659e-14	663213	9.096767582e-05	60.3362518968608
BMI	rs274628	7	86265855	A	C	0.3366	-0.0102	0.0018	1.357e-08	718131	4.64643555552e-05	33.3689516573345
BMI	rs2283006	7	93085722	A	G	0.4881	0.0132	0.0017	8.055e-15	717331	8.70706517472e-05	62.4637423059204
BMI	rs13240600	7	99064466	A	G	0.8343	0.018	0.0022	7.904e-16	718601	8.958179448e-05	64.3791551317773
BMI	rs1721447	7	109214139	T	G	0.5096	-0.01	0.0017	3.793e-09	718656	4.9981568e-05	35.92124916983
BMI	rs2396625	7	113028634	A	T	0.4183	-0.0176	0.0017	2.805e-24	718567	0.0001507447721472	108.336248321021
BMI	rs13245051	7	113362799	A	G	0.4557	0.015	0.0017	1.121e-18	714046	0.0001116168795	79.7082598929376
BMI	rs10261050	7	114337652	T	C	0.4754	0.0113	0.0017	4.533e-11	718350	6.36904542392e-05	45.7548245673812
BMI	rs2283093	7	126721231	T	C	0.1949	0.0121	0.0021	1.095e-08	718467	4.59475545518e-05	33.0132266580918
BMI	rs7802342	7	137435925	T	G	0.7048	-0.0124	0.0019	6.233e-11	712979	6.39816763392e-05	45.6203825198427
BMI	rs11525873	7	138817193	T	C	0.8995	0.0232	0.0032	2.977e-13	484680	9.731352288e-05	47.1703139518587
BMI	rs11773362	7	147668180	T	C	0.3396	-0.0105	0.0018	6.389e-09	718218	4.945194072e-05	35.5189315362523
BMI	rs2907948	7	150638484	A	G	0.244	-0.0145	0.0019	1.945e-14	806659	7.7567112e-05	62.5749076194517
BMI	rs56211164	7	158016764	A	G	0.2395	-0.0128	0.0022	8.9e-09	484680	5.968355328e-05	28.9290318240561
BMI	rs1700082	8	4121727	C	G	0.659	0.0094	0.0017	3.377e-08	803933	3.971234168e-05	31.9272504650235
BMI	rs4240673	8	10787612	T	C	0.4545	0.0175	0.0016	1.584e-26	806735	0.000151856971875	122.526637015706
BMI	rs13263601	8	14095900	A	C	0.6585	-0.0145	0.0018	4.867e-16	714980	9.4561093875e-05	67.6154955717839
BMI	rs10110189	8	15393380	T	C	0.1057	-0.0156	0.0028	2.198e-08	710200	4.60084296672e-05	32.676598131753
BMI	rs10101364	8	20634888	T	C	0.6801	0.012	0.0018	5.607e-11	711583	6.265842912e-05	44.5893415497357
BMI	rs73225274	8	21088909	A	G	0.8649	-0.0156	0.0028	2.326e-08	484680	5.68722536928e-05	27.5662979328083
BMI	rs13249650	8	25664336	A	T	0.4443	0.011	0.0019	1.02e-08	484680	5.974919742e-05	28.9608518947881
BMI	rs1421334	8	30865733	A	C	0.4546	0.0135	0.0017	3.111e-15	717941	9.037370718e-05	64.8886731890521
BMI	rs2466103	8	32412304	T	G	0.6928	-0.0121	0.0018	8.004e-12	802631	6.23203418112e-05	50.0232310924418
BMI	rs6468266	8	34380276	A	T	0.4176	-0.0113	0.0017	7.708e-11	718278	6.21110310912e-05	44.615634091099
BMI	rs12681792	8	62054463	A	C	0.2024	0.015	0.0021	2.883e-12	717806	7.2645408e-05	52.1489528259868
BMI	rs12334877	8	67194171	A	G	0.1913	-0.0144	0.0021	2.173e-11	717934	6.41589714432e-05	46.0647341521225
BMI	rs1808629	8	73435964	A	G	0.674	-0.0202	0.002	2.191e-23	484680	0.00017931236192	86.9243435600138
BMI	rs17405819	8	76806584	T	C	0.6845	0.0211	0.0018	6.04e-33	806765	0.000192294880595	155.166232425601
BMI	rs2196618	8	85089437	A	G	0.2634	-0.0137	0.0019	1.492e-12	718304	7.28313927672e-05	52.3187455345704
BMI	rs12386885	8	87766769	T	C	0.1564	0.0151	0.0026	9.902e-09	484680	6.01668410208e-05	29.163298835844
BMI	rs2120710	8	93210803	A	G	0.6529	0.0101	0.0018	1.977e-08	717132	4.62353367918e-05	33.1582801577541
BMI	rs12680842	8	95582606	A	G	0.6839	0.0142	0.0017	3.411e-16	800300	8.71813889912e-05	69.7771745178737
BMI	rs1383592	8	106430676	A	G	0.212	0.0122	0.0021	4.92e-09	718467	4.972923008e-05	35.7304881390927
BMI	rs3808477	8	116670347	T	C	0.274	-0.0182	0.0019	8.726e-22	718439	0.00013178317152	94.6903849965615
BMI	rs72673947	8	118884379	A	G	0.8902	-0.0223	0.0031	4.106e-13	484680	9.72141877368e-05	47.1221590263109
BMI	rs6470144	8	124152245	T	G	0.6503	0.0098	0.0018	3.055e-08	718448	4.36808955128e-05	31.3837355272615
BMI	rs7842934	8	132838921	T	C	0.9211	-0.0178	0.0031	1.548e-08	718652	4.60525609272e-05	33.0971971210192
BMI	rs305256	8	137568252	T	C	0.2263	-0.0115	0.0021	2.792e-08	714665	4.6310857995e-05	33.0981895128351
BMI	rs16906838	8	138213836	T	C	0.0486	-0.0247	0.004	4.305e-10	706788	5.64187316472e-05	39.8782195445649
BMI	rs11782074	8	142617096	T	G	0.3675	0.0124	0.0018	4.238e-12	717837	7.1481102e-05	51.3153049287158
BMI	rs10099330	8	143383694	A	G	0.538	-0.0119	0.0017	3.218e-12	714811	7.039603032e-05	50.3232585946467
BMI	rs10975933	9	6954557	C	G	0.6634	0.0114	0.0018	2.065e-10	718391	5.80402503648e-05	41.6978975757333
BMI	rs1948080	9	11852043	T	G	0.6303	0.0136	0.0018	1.134e-14	718672	8.61994649472e-05	61.9543099019689
BMI	rs10961649	9	14670949	T	C	0.3238	0.0104	0.0018	1.513e-08	717449	4.73640340992e-05	33.98279373457
BMI	rs4740619	9	15634326	T	C	0.5436	0.0189	0.0016	3.147e-31	806567	0.0001772469161568	142.986502846691
BMI	rs10962550	9	16720329	C	G	0.1756	0.0186	0.0022	5.675e-17	718060	0.0001001655497088	71.9318793890421
BMI	rs10811868	9	23199959	A	G	0.32	-0.01	0.0018	3.177e-08	718501	4.352e-05	31.2704373694343
BMI	rs10968114	9	27800007	A	C	0.5331	0.0113	0.0017	3.302e-11	718364	6.35652031182e-05	45.6657291937481
BMI	rs1412235	9	28410996	C	G	0.3151	0.0237	0.0017	2.277e-42	804074	0.0002424388733262	194.98558183792
BMI	rs10121187	9	29737191	C	G	0.509	0.0102	0.0017	2.016e-09	718682	5.200314552e-05	37.3755642692212
BMI	rs2275003	9	34124860	A	G	0.5007	0.0111	0.0016	9.438e-12	806747	6.16048792542e-05	49.7024902298388
BMI	rs13296413	9	37258105	T	C	0.3811	-0.0148	0.0017	2.49e-17	718610	0.0001033267710432	74.2591172406168
BMI	rs2134858	9	73837155	T	C	0.5119	-0.0117	0.0017	5.869e-12	718696	6.84062300142e-05	49.1665103694428
BMI	rs7861160	9	80799579	T	C	0.5941	0.0095	0.0017	3.678e-08	714958	4.3526706795e-05	31.121034779482
BMI	rs1999433	9	81371441	T	C	0.4403	-0.0107	0.0017	2.899e-10	718517	5.64288946718e-05	40.5472952941638
BMI	rs2777768	9	84186734	A	G	0.7228	0.0119	0.0019	6.377e-10	718589	5.67460045152e-05	40.7792552063641
BMI	rs7357754	9	92207308	A	G	0.4985	-0.012	0.0017	1.814e-12	718167	7.1999352e-05	51.7111377974926
BMI	rs10992867	9	96461013	A	G	0.2687	0.0162	0.0019	3.195e-17	718610	0.0001031390827128	74.1242150536272
BMI	rs7025938	9	103088321	C	G	0.6798	-0.0162	0.0018	1.47e-19	717817	0.0001142516583648	82.0209251758509
BMI	rs7024334	9	109072075	T	G	0.2254	0.0135	0.002	4.708e-12	799813	6.363981918e-05	50.9030668801469
BMI	rs1928295	9	120378483	T	C	0.5712	0.0134	0.0016	2.225e-16	806659	8.79594627072e-05	70.9593578559929
BMI	rs1877875	9	120664469	T	C	0.4341	-0.0109	0.0017	2.505e-10	718589	5.83730614878e-05	41.9485718018949
BMI	rs13298487	9	126112104	T	C	0.6076	0.0115	0.002	1.425e-08	484680	6.306268248e-05	30.567022457473
BMI	rs10733682	9	129460914	A	G	0.4594	0.0148	0.0016	1.755e-19	805407	0.0001087978864512	87.6358963375275
BMI	rs2267958	9	131015279	A	G	0.5088	-0.013	0.0018	2.013e-13	710694	8.447382528e-05	60.0399436396026
BMI	rs4740383	9	133783566	A	G	0.4185	0.0131	0.0018	7.028e-14	694837	8.3525246955e-05	58.0411128662631
BMI	rs10858334	9	137989785	C	G	0.8484	-0.0148	0.0025	4.914e-09	707975	5.63447281152e-05	39.8927939465312
BMI	rs7907470	10	10268989	A	G	0.9161	-0.0177	0.0031	7.355e-09	714852	4.81594337982e-05	34.4284293043051
BMI	rs7893571	10	16750129	T	G	0.6736	0.0125	0.0018	5.832e-12	718186	6.87072e-05	49.3478022741204
BMI	rs76638898	10	21099584	A	G	0.0234	-0.0376	0.0065	8.148e-09	484680	6.46157311488e-05	31.3198470965577
BMI	rs7084454	10	21821274	A	G	0.3086	0.0198	0.0018	4.505e-27	706792	0.0001672960446432	118.262956318187
BMI	rs10829164	10	27318370	T	C	0.1468	0.0151	0.0024	2.365e-10	718703	5.71163955552e-05	41.0519553416374
BMI	rs4097319	10	33860515	T	G	0.5641	0.0107	0.0017	4.323e-10	718651	5.63041646862e-05	40.4652100074213
BMI	rs12765914	10	34013507	T	C	0.0801	0.0226	0.0031	1.96e-13	718619	7.52696694648e-05	54.094135709501
BMI	rs1624134	10	34834482	C	G	0.3925	0.01	0.0017	6.505e-09	717695	4.768875e-05	34.2275143211236
BMI	rs12259464	10	53680099	A	G	0.4811	0.0109	0.0017	1.478e-10	716686	5.93201197598e-05	42.5163027821053
BMI	rs7070670	10	61842645	T	C	0.3228	-0.0126	0.0021	7.143e-10	484680	6.94099228032e-05	33.6437977778159
BMI	rs10761785	10	65318766	T	G	0.5136	-0.0133	0.0016	3.467e-16	806365	8.83795648512e-05	71.2723100678579
BMI	rs12098284	10	76047464	T	C	0.1212	0.0184	0.0026	9.868e-13	714745	7.21204303872e-05	51.5512906775092
BMI	rs11001259	10	76807650	A	T	0.1767	-0.0138	0.0024	1.224e-08	684694	5.54093216568e-05	37.9404215168573
BMI	rs7899106	10	87410904	A	G	0.9496	-0.0327	0.0037	1.719e-18	806450	0.0001023520966272	82.5500927958866
BMI	rs10788494	10	88110925	C	G	0.4835	0.0132	0.0017	5.507e-15	718328	8.702512632e-05	62.5178515128655
BMI	rs147568678	10	93061851	T	C	0.7684	0.0134	0.0023	3.422e-09	484680	6.39095123328e-05	30.9775143762739
BMI	rs2439823	10	99778226	A	G	0.4514	-0.0165	0.0017	6.513e-22	718034	0.00013483891278	96.8317109038699
BMI	rs17094222	10	102395440	T	C	0.7912	-0.0173	0.002	4.043e-18	806450	9.88869483648e-05	79.7550684702339
BMI	rs11594179	10	104392580	T	C	0.2328	-0.0109	0.0019	2.158e-08	806767	4.24399204992e-05	34.2404956254493
BMI	rs79780963	10	104952499	T	C	0.0804	0.0244	0.0035	2.632e-12	484680	8.80368834048e-05	42.6732973989793
BMI	rs7903146	10	114758349	T	C	0.2787	-0.0178	0.0018	1.665e-23	806810	0.0001273863521208	102.789421951377
BMI	rs2257791	10	118643670	A	G	0.756	-0.0139	0.002	1.631e-12	718675	7.128057888e-05	51.2310792464116
BMI	rs845084	10	125220036	A	G	0.2666	0.0136	0.0019	3.219e-12	718056	7.23284008448e-05	51.9394542378778
BMI	rs17636031	10	126594078	T	C	0.7244	-0.0154	0.0018	3.87e-17	798189	9.46954456448e-05	75.5918318750925
BMI	rs4880341	10	133992689	T	C	0.5725	-0.013	0.0017	3.059e-14	716038	8.27233875e-05	59.2378238454066
BMI	rs11246136	11	371265	A	C	0.1021	-0.0167	0.003	2.034e-08	655523	5.11348105902e-05	33.5216562964439
BMI	rs12421848	11	891338	A	G	0.3962	-0.0141	0.0019	3.993e-13	484680	9.51208671672e-05	46.1073774305882
BMI	rs4256980	11	8673939	C	G	0.3305	-0.0187	0.0017	8.633e-29	804708	0.000154751637755	124.548845549104
BMI	rs900144	11	13294268	T	C	0.5784	0.0148	0.0017	1.526e-18	718416	0.0001068273149952	76.7544381455027
BMI	rs2074314	11	17411821	T	C	0.6356	0.0105	0.0017	1.369e-09	747074	5.107058712e-05	38.1553542772574
BMI	rs6265	11	27679916	T	C	0.1836	-0.0413	0.0021	7.399e-89	806782	0.0005113352960352	412.746141805886
BMI	rs570463	11	28739318	A	C	0.3266	-0.0121	0.0018	4.33e-11	718580	6.44006170808e-05	46.2798470713969
BMI	rs11030618	11	29243293	T	C	0.5786	0.011	0.0017	1.673e-10	718309	5.900493368e-05	42.386157889315
BMI	rs2065418	11	30422068	T	G	0.646	0.0139	0.0018	6.073e-15	718408	8.836807128e-05	63.4897630838894
BMI	rs2862996	11	43653833	T	G	0.7012	-0.0216	0.0017	3.604e-35	806675	0.0001955059587072	157.740217380639
BMI	rs10742752	11	45438374	T	C	0.3761	-0.0123	0.0017	1.203e-13	806700	7.10000308782e-05	57.2796497662843
BMI	rs118081010	11	46174948	T	C	0.0165	0.0518	0.0075	5.277e-12	484680	8.708589582e-05	42.2122939096757
BMI	rs7124681	11	47529947	A	C	0.4162	0.0257	0.0016	3.956e-55	806656	0.0003209684972088	258.9936509504
BMI	rs6591407	11	56914157	A	C	0.1984	-0.0124	0.0021	3.583e-09	806782	4.89071935488e-05	39.4592754537228
BMI	rs562664	11	63823619	T	C	0.1873	-0.0138	0.0022	4.15e-10	696578	5.79770622648e-05	40.3877716885192
BMI	rs7102454	11	65594820	T	C	0.6437	-0.0168	0.0018	3.839e-21	718609	0.0001294636629888	93.0455404858887
BMI	rs592483	11	69445173	T	C	0.5933	-0.0137	0.0017	1.525e-16	802791	9.05773583918e-05	72.7210938505751
BMI	rs12282785	11	76476030	A	C	0.2204	-0.0157	0.0023	1.434e-11	484680	8.47057166432e-05	41.0584752187606
BMI	rs349088	11	84814393	A	C	0.4777	-0.013	0.0017	3.501e-14	718429	8.433191598e-05	60.5914351935853
BMI	rs10741329	11	89997796	A	G	0.6944	0.0115	0.0018	3.914e-10	718412	5.612918528e-05	40.3260314642965
BMI	rs3019466	11	92476178	T	C	0.1677	-0.0128	0.0024	4.905e-08	718585	4.57364963328e-05	32.8669719644551
BMI	rs2605603	11	93221105	A	G	0.4812	-0.0103	0.0016	2.041e-10	806679	5.29700071008e-05	42.7319499297433
BMI	rs2513999	11	103019633	A	G	0.1593	-0.0154	0.0026	3.066e-09	484680	6.35225992632e-05	30.7899622241209
BMI	rs12286929	11	115022404	A	G	0.5007	-0.0177	0.0016	1.925e-27	806583	0.0001566446929758	126.366427735389
BMI	rs76942203	11	116973247	A	G	0.0587	0.0263	0.0041	9.078e-11	484680	7.64377073678e-05	37.0505071874368
BMI	rs3825061	11	118944675	T	C	0.3863	0.014	0.0017	6.149e-16	718354	9.293234552e-05	66.764340835774
BMI	rs11218510	11	121922587	A	G	0.3949	-0.014	0.002	6.788e-13	484680	9.366996408e-05	45.4040238436488
BMI	rs35483388	11	122545146	T	C	0.3794	0.0125	0.002	2.607e-10	484680	7.35798875e-05	35.6651769534329
BMI	rs7944782	11	130795698	T	G	0.5016	-0.0144	0.0017	3.61e-17	718230	0.0001036789383168	74.4728377741525
BMI	rs2007518	11	132639606	A	G	0.5618	-0.013	0.0017	1.964e-14	718682	8.320909688e-05	59.8056901231818
BMI	rs1941213	11	133125329	A	C	0.7114	0.0108	0.0019	1.585e-08	718648	4.78947261312e-05	34.4210019397434
BMI	rs329651	11	133767622	T	G	0.806	0.016	0.0021	2.13e-14	799668	8.0058368e-05	64.0250806485558
BMI	rs12364470	11	134601012	T	G	0.8535	-0.0187	0.0022	2.18e-17	799515	8.7448901595e-05	69.9226483197154
BMI	rs11611246	12	939480	T	G	0.199	0.0223	0.002	2.037e-28	793063	0.00015853505742	125.74790662416
BMI	rs765125	12	2156207	T	C	0.5855	-0.0098	0.0017	1.268e-08	718461	4.661584718e-05	33.4931362600171
BMI	rs10772983	12	17141582	T	C	0.5394	-0.01	0.0016	6.209e-10	804927	4.9689528e-05	39.9983308235794
BMI	rs11044430	12	19287416	A	T	0.844	0.0161	0.0023	3.765e-12	718664	6.825725088e-05	49.0572409443252
BMI	rs11046972	12	23705969	T	C	0.0714	0.0176	0.0032	3.717e-08	703495	4.10754398208e-05	28.8974713622
BMI	rs10842240	12	24060075	C	G	0.1256	0.0195	0.0025	1.211e-14	718478	8.352163872e-05	60.0133053105953
BMI	rs11170468	12	39430048	A	C	0.7826	0.013	0.0019	1.124e-11	806636	5.750638712e-05	46.3892747477459
BMI	rs1350430	12	41819215	T	C	0.5328	-0.0125	0.0017	2.075e-13	718510	7.77888e-05	55.8962232105281
BMI	rs1126930	12	49399132	C	G	0.0339	0.0341	0.0053	1.004e-10	484680	7.61658922398e-05	36.9187442680993
BMI	rs7138803	12	50247468	A	G	0.387	0.0297	0.0017	3.095e-71	806772	0.00041851818558	337.789287540106
BMI	rs2271189	12	56494991	A	G	0.396	-0.0141	0.0018	9.264e-16	706022	9.510434208e-05	67.1519540377298
BMI	rs7975187	12	60964108	A	G	0.7712	-0.0137	0.0021	3.86e-11	718606	6.62360112128e-05	47.6006154764634
BMI	rs650198	12	69674595	T	C	0.7294	-0.0137	0.0019	6.425e-13	714521	7.40908677432e-05	52.9432553407329
BMI	rs11115176	12	82465797	T	C	0.7839	0.0131	0.0019	6.793e-12	805743	5.81417391438e-05	46.8499069745348
BMI	rs10506971	12	89757937	A	G	0.5521	-0.0142	0.0017	4.686e-17	717231	9.97253327352e-05	71.5330343279847
BMI	rs11105839	12	91237920	A	T	0.3729	-0.0113	0.0017	1.248e-11	801313	5.97194867742e-05	47.8567396464514
BMI	rs2712665	12	99594947	T	C	0.6968	-0.0108	0.0019	5.399e-09	717879	4.92850096128e-05	35.3823186637235
BMI	rs6539064	12	103706754	C	G	0.7468	0.0194	0.0019	1.135e-23	718487	0.0001423316441472	102.27770869954
BMI	rs1860561	12	110783241	A	G	0.2087	0.0159	0.0019	1.706e-16	806805	8.35002660222e-05	67.3738908653192
BMI	rs11066188	12	112610714	A	G	0.3762	-0.0114	0.0016	3.053e-12	805492	6.09963517152e-05	49.1349483956703
BMI	rs2707183	12	116957607	T	G	0.5321	-0.0093	0.0017	4.894e-08	718328	4.30667596782e-05	30.9373055821073
BMI	rs11615578	12	121714935	T	C	0.2575	0.0117	0.002	3.036e-09	704912	5.2345024875e-05	36.900463040292
BMI	rs12369179	12	122963550	T	C	0.085	-0.034	0.0031	2.324e-28	703003	0.0001798158	126.433421942713
BMI	rs11060853	12	123424071	A	G	0.591	-0.0107	0.0019	3.098e-08	484680	5.534881662e-05	26.827838630869
BMI	rs11614340	12	133426483	T	C	0.7066	-0.0117	0.0018	1.87e-10	718698	5.67590949432e-05	40.7948499780612
BMI	rs9512648	13	27933910	A	G	0.4741	0.0095	0.0017	4.113e-08	705792	4.5003918795e-05	31.7647453843449
BMI	rs7323	13	28009031	C	G	0.268	-0.0166	0.0019	2.179e-18	718060	0.00010811651712	77.6423244678555
BMI	rs4771218	13	28655311	A	G	0.6244	-0.0141	0.0018	3.18e-15	717363	9.32516873568e-05	66.9013623588879
BMI	rs9595908	13	33184288	T	C	0.6427	0.0154	0.0017	3.734e-20	806589	0.0001089212842872	87.8640621958569
BMI	rs9603697	13	40783323	T	C	0.3184	0.0134	0.0018	1.689e-13	718556	7.79367395328e-05	56.0061208727063
BMI	rs12429545	13	54102206	A	G	0.1218	0.0313	0.0024	1.419e-37	797614	0.0002095846114488	167.202244124268
BMI	rs962796	13	54385284	T	C	0.1937	0.014	0.0021	1.88e-11	718667	6.122268152e-05	44.0012922916752
BMI	rs9569777	13	58484786	T	G	0.1865	-0.0201	0.0021	3.43e-21	806752	0.000122590976355	98.9123959415883
BMI	rs9527895	13	59367767	T	C	0.819	-0.0158	0.0023	3.693e-12	718497	7.401276792e-05	53.1817398144469
BMI	rs8181823	13	65477940	A	C	0.2344	-0.0125	0.002	4.363e-10	718253	5.60802e-05	40.2819187482598
BMI	rs9599161	13	67434016	T	C	0.57	0.0098	0.0016	2.324e-09	806768	4.7078808e-05	37.9833698267033
BMI	rs1441264	13	79580919	A	G	0.5846	0.0174	0.0017	7.603e-25	794966	0.0001470461964768	116.913624239744
BMI	rs9531786	13	85983968	C	G	0.3715	-0.0111	0.0018	4.111e-10	714692	5.7536051355e-05	41.1228065868166
BMI	rs77432547	13	86494817	A	G	0.7229	-0.017	0.0021	1.44e-15	484680	0.00011578241102	56.1236855439792
BMI	rs1927790	13	96922191	T	C	0.606	-0.014	0.0016	1.571e-17	806731	9.3595488e-05	75.5132621393724
BMI	rs9168	13	99101583	A	C	0.2752	-0.0139	0.0019	1.075e-13	718514	7.70772498432e-05	55.3851978780718
BMI	rs9888533	13	107854612	T	C	0.5302	0.0125	0.0019	1.378e-10	484680	7.78399875e-05	37.7302663849888
BMI	rs9522183	13	111977280	T	G	0.5492	-0.0135	0.0019	2.1e-12	484680	9.024267672e-05	43.7425875154802
BMI	rs12868881	13	112218924	A	T	0.4066	0.0138	0.0017	1.401e-15	718650	9.18973704672e-05	66.0479311227073
BMI	rs10132280	14	25928179	A	C	0.311	-0.0214	0.0018	2.283e-33	806477	0.00019626242168	158.311807183036
BMI	rs4981693	14	29680331	A	G	0.7743	0.0202	0.002	7.894e-24	718593	0.0001426177409208	102.49844316243
BMI	rs225882	14	30480123	T	C	0.7513	0.0113	0.0018	8.564e-10	806807	4.77173214078e-05	38.5004106348887
BMI	rs1958898	14	40886886	C	G	0.2098	-0.0146	0.0021	4.225e-12	718191	7.06770178272e-05	50.7630445369026
BMI	rs61983990	14	41475003	A	G	0.0802	0.0198	0.0035	1.912e-08	484680	5.78399820768e-05	28.0353883993818
BMI	rs4900714	14	47302219	T	G	0.4776	0.015	0.0017	1.001e-18	718662	0.000112274208	80.6960424055298
BMI	rs217669	14	62360075	T	C	0.7224	-0.0172	0.0021	6.271e-16	484680	0.0001186544658432	57.5160337302102
BMI	rs4430672	14	63094407	T	C	0.1958	0.0124	0.0021	5.003e-09	718676	4.84228249472e-05	34.8019105029241
BMI	rs3902951	14	69789755	T	G	0.7691	-0.0134	0.0019	2.883e-12	794335	6.37743934328e-05	50.6613361546401
BMI	rs17182027	14	73348130	A	G	0.5647	-0.011	0.0017	1.46e-10	717831	5.948696622e-05	42.7040098067252
BMI	rs7144011	14	79940383	T	G	0.2334	0.0263	0.002	2.374e-40	806721	0.0002475204918072	199.728920630875
BMI	rs4517716	14	83013876	C	G	0.7924	-0.0117	0.002	4.27e-09	806706	4.50374232672e-05	36.3335058668258
BMI	rs12888545	14	88308044	A	G	0.7464	-0.0133	0.002	1.764e-11	718431	6.69659690112e-05	48.1135161189769
BMI	rs1951455	14	91512339	T	C	0.2813	-0.0148	0.0019	6.048e-15	718607	8.85667694048e-05	63.6501606172343
BMI	rs942066	14	94031914	A	G	0.373	-0.0202	0.002	2.356e-24	484680	0.00019085744568	92.5220635820153
BMI	rs7161194	14	101529005	A	G	0.3437	0.019	0.0019	2.23e-24	773952	0.00016286176382	126.067393666582
BMI	rs10145749	14	102782109	T	C	0.1549	0.0161	0.0026	8.325e-10	484680	6.78642833358e-05	32.8945574841982
BMI	rs4906263	14	103249127	C	G	0.6562	-0.0176	0.0018	8.106e-23	718534	0.0001397646784512	100.43943182179
BMI	rs2273175	14	104160141	T	C	0.6791	-0.0121	0.0018	3.69e-11	718683	6.38122684958e-05	45.8635915946511
BMI	rs12594043	15	27034988	C	G	0.5205	0.0102	0.0017	1.312e-09	718508	5.193255438e-05	37.3157898216404
BMI	rs7172627	15	31877690	A	G	0.523	-0.0114	0.0017	1.813e-11	718111	6.484250232e-05	46.5670040195791
BMI	rs11636611	15	36391965	T	C	0.4981	0.0104	0.0017	8.853e-10	718657	5.40792190848e-05	38.8664030561129
BMI	rs9944219	15	46500612	A	G	0.6044	-0.0119	0.0017	8.137e-13	806243	6.77180832608e-05	54.6007926272919
BMI	rs12912198	15	47103953	T	C	0.2731	-0.01	0.0018	3.44e-08	799783	3.9703278e-05	31.7551881671817
BMI	rs6493498	15	51754451	T	C	0.4465	0.0137	0.0016	4.838e-17	805967	9.2770568595e-05	74.7767684009914
BMI	rs10518694	15	53072673	A	C	0.1394	0.0144	0.0024	3.431e-09	718281	4.97529796608e-05	35.7382985646214
BMI	rs12439632	15	59103963	C	G	0.1682	0.0145	0.0023	3.675e-10	718615	5.883163358e-05	42.2796640835298
BMI	rs339991	15	60913637	A	G	0.4201	-0.0125	0.0017	3.514e-13	717095	7.6129996875e-05	54.5964442762165
BMI	rs1559673	15	62156514	A	C	0.9688	0.0359	0.0049	2.212e-13	791967	7.79125855872e-05	61.7088487405259
BMI	rs2241423	15	68086838	A	G	0.2285	-0.0298	0.0019	3.602e-54	806797	0.00031310114702	252.687556673833
BMI	rs7171864	15	73227249	A	G	0.6935	0.0132	0.0017	2.6e-14	806698	7.407212472e-05	59.7581131335342
BMI	rs2470893	15	75019449	T	C	0.3049	0.0107	0.0017	9.43e-10	803692	4.85291029902e-05	39.0042476233438
BMI	rs56151256	15	78024806	A	C	0.7555	0.0166	0.0022	6.187e-14	484680	0.00010180274862	49.3465762127378
BMI	rs12914623	15	80993570	C	G	0.2722	-0.0159	0.0019	1.999e-16	718054	0.0001001669422392	71.9322784451222
BMI	rs72757415	15	92572762	T	G	0.2123	-0.0159	0.0023	1.337e-11	484680	8.45541803502e-05	40.9850164782492
BMI	rs11633626	15	95271378	A	C	0.6313	-0.0157	0.0018	7.272e-19	718669	0.0001147461776238	82.473754782479
BMI	rs6496248	15	98262923	A	T	0.6352	0.0104	0.0018	2.929e-09	717972	5.01258780672e-05	35.9906807403819
BMI	rs12591120	15	99236869	T	C	0.7397	0.012	0.0022	3.835e-08	484680	5.545264608e-05	26.8781680623031
BMI	rs2715423	15	99511873	A	G	0.2805	-0.0115	0.0019	1.901e-09	706401	5.3381323875e-05	37.710526841823
BMI	rs214249	16	348687	T	G	0.6071	0.0138	0.0017	2.715e-15	718521	9.08511502392e-05	65.2842087641784
BMI	rs12448257	16	3599655	A	G	0.2185	0.0161	0.002	9.035e-16	797946	8.8524232755e-05	70.6436340549595
BMI	rs879620	16	4015729	T	C	0.5966	0.0226	0.0017	8.449e-39	718515	0.0002458476248288	176.688152821322
BMI	rs2058527	16	6704749	T	G	0.2715	-0.0115	0.0019	1.795e-09	718465	5.2314859875e-05	37.5882575948011
BMI	rs9926784	16	19941968	T	C	0.8007	0.0237	0.0021	1.084e-30	800954	0.0001792684299438	143.611152446168
BMI	rs194809	16	23804956	A	G	0.1871	0.0126	0.0022	4.861e-09	718688	4.82927566968e-05	34.7090043328978
BMI	rs2342892	16	24540806	T	G	0.4855	0.0126	0.0017	1.328e-13	714485	7.931324142e-05	56.672457545793
BMI	rs7498665	16	28883241	A	G	0.6179	-0.0285	0.0017	1.139e-66	804216	0.000383543783955	308.569630633333
BMI	rs3814883	16	29994922	T	C	0.4795	0.0227	0.0017	1.471e-40	717877	0.000257211898755	184.693497183844
BMI	rs2193101	16	49035172	C	G	0.1947	0.0142	0.0021	3.327e-11	718146	6.32310414648e-05	45.4118644811833
BMI	rs16952482	16	53771583	T	C	0.8876	-0.0151	0.0027	3.056e-08	805406	4.54954007648e-05	36.6438448839816
BMI	rs9937053	16	53799507	A	G	0.4372	0.0721	0.0016	0	805790	0.0025582016054112	2066.65507555319
BMI	rs8057911	16	54143352	T	C	0.234	0.0125	0.0023	3.658e-08	484680	5.601375e-05	27.1501531043885
BMI	rs889398	16	69556715	T	C	0.4151	-0.0195	0.0016	3.234e-32	806620	0.000184643308395	148.964121359158
BMI	rs35949039	16	70572605	T	G	0.1056	-0.0215	0.0031	6.297e-12	484680	8.731776768e-05	42.3246967016408
BMI	rs12926250	16	72213316	T	G	0.1051	0.018	0.0028	1.784e-10	718628	6.094698552e-05	43.8007579404555
BMI	rs756717	16	72996162	A	G	0.394	-0.0134	0.0017	2.383e-15	804190	8.574492768e-05	68.9609549532191
BMI	rs4390583	16	81694835	A	C	0.5714	-0.01	0.0018	1.63e-08	702884	4.8980408e-05	34.4291334888614
BMI	rs12922346	16	82438337	C	G	0.2641	0.0133	0.002	1.482e-11	716945	6.87575639982e-05	49.2986438602217
BMI	rs7206608	16	82872628	C	G	0.6751	-0.013	0.0018	1.202e-12	717196	7.413691662e-05	53.1744939713901
BMI	rs3923783	17	1843189	A	C	0.1784	-0.0222	0.0022	4.121e-23	714524	0.0001444745083392	103.245130937072
BMI	rs11078883	17	2138828	C	G	0.654	-0.0126	0.0018	1.299e-12	718501	7.184969568e-05	51.6276439268891
BMI	rs7774	17	4801163	A	C	0.3197	0.0128	0.0021	4.223e-10	484680	7.12677490688e-05	34.5443719828021
BMI	rs1075901	17	15943910	T	C	0.4516	-0.0118	0.0016	4.431e-13	806810	6.89676438912e-05	55.6474847084801
BMI	rs4986044	17	21261560	T	C	0.455	-0.0177	0.0016	1.269e-27	802591	0.0001553761755	124.722588237128
BMI	rs8065172	17	31456969	A	G	0.2383	-0.0124	0.002	5.291e-10	718308	5.58189115872e-05	40.0972972940478
BMI	rs12150665	17	34914787	T	C	0.5931	0.0168	0.0016	1.737e-24	806685	0.0001362273075072	109.907225467232
BMI	rs6607337	17	35057373	T	C	0.2978	-0.0124	0.0019	2.548e-11	718656	6.43070940032e-05	46.2175224483364
BMI	rs56161855	17	46288649	A	T	0.8678	-0.0233	0.0028	1.408e-16	484680	0.0001245641126648	60.3810063046221
BMI	rs9299	17	46669430	T	C	0.6447	0.0119	0.0018	1.869e-11	718669	6.48749141502e-05	46.6264848167814
BMI	rs11655587	17	47140794	T	C	0.3572	-0.021	0.002	6.874e-26	484680	0.00020251439712	98.1741546470685
BMI	rs11649864	17	56093061	A	G	0.0859	0.0192	0.003	2.524e-10	690306	5.78921029632e-05	39.9654639286615
BMI	rs12602912	17	65870073	T	C	0.212	0.0166	0.002	2.899e-16	788746	9.206790272e-05	72.6246922660863
BMI	rs312750	17	68343539	A	G	0.4986	0.0097	0.0016	2.565e-09	806739	4.70446311672e-05	37.9544301661018
BMI	rs12939549	17	78611724	A	G	0.5572	0.018	0.0016	3.681e-28	806064	0.00015987984768	128.893677282127
BMI	rs35867081	17	79047278	A	G	0.4871	0.015	0.0019	6.648e-15	484680	0.0001124251155	54.4961068614172
BMI	rs8097672	18	1839601	A	T	0.8545	-0.0209	0.0024	3.26e-18	718627	0.000108616956195	78.0633391479205
BMI	rs478707	18	7543207	T	C	0.2032	-0.015	0.0024	1.983e-10	484680	7.2859392e-05	35.3159174920524
BMI	rs891387	18	21103909	T	C	0.4951	0.0208	0.0017	9.256e-35	718548	0.0002162992246272	155.454567361361
BMI	rs1945160	18	22164216	A	G	0.3819	-0.0104	0.0018	5.651e-09	718540	5.10628530048e-05	36.6924738947639
BMI	rs1941696	18	31252129	A	G	0.5174	0.0112	0.0017	4.741e-11	718672	6.26440435712e-05	45.0232152295709
BMI	rs474605	18	39612720	A	G	0.4679	-0.0125	0.0017	2.717e-13	718363	7.7802996875e-05	55.8949874356547
BMI	rs1356506	18	40708038	T	C	0.6287	0.0137	0.0018	8.394e-15	718632	8.76273220478e-05	62.9771409614232
BMI	rs2612576	18	42967950	A	T	0.2945	-0.0108	0.0019	8.49e-09	718611	4.846852728e-05	34.8316081569037
BMI	rs9951619	18	56882326	T	G	0.2239	-0.0152	0.0019	2.332e-15	794609	8.02950824832e-05	63.8081580880449
BMI	rs6567160	18	57829135	T	C	0.7518	-0.0552	0.0019	7.82e-184	806638	0.0011371355831808	918.298728434721
BMI	rs17066856	18	58049656	T	C	0.8915	0.035	0.0027	7.098e-38	804453	0.0002369829875	190.686390707908
BMI	rs66595146	18	58204315	A	C	0.6291	0.0135	0.002	9.093e-12	484680	8.5049947755e-05	41.2253447914186
BMI	rs17783165	18	63461638	T	C	0.671	-0.0128	0.0017	2.737e-13	801018	7.233830912e-05	57.9483349026291
BMI	rs11150911	18	73498528	A	C	0.2848	0.0118	0.0018	3.718e-11	802197	5.67233015808e-05	45.5057301468646
BMI	rs12981256	19	1865901	A	G	0.5284	0.0151	0.0017	1.432e-18	715373	0.0001136371925088	81.3019909722122
BMI	rs45486197	19	2244849	A	G	0.0635	0.0279	0.004	1.801e-12	484680	9.2580582555e-05	44.8759262309855
BMI	rs895330	19	4060707	C	G	0.806	0.0196	0.0022	1.588e-19	712588	0.00012013758848	85.6186496427063
BMI	rs273512	19	18224729	T	C	0.409	0.0156	0.0018	4.477e-19	718525	0.00011764947168	84.5437978730822
BMI	rs17724992	19	18454825	A	G	0.7197	0.0172	0.0018	5.232e-21	804268	0.0001193607365088	96.0092418428045
BMI	rs7258722	19	18808915	A	T	0.4131	-0.02	0.0017	1.806e-30	717923	0.000193958712	139.274045892308
BMI	rs12611148	19	19865077	A	C	0.1429	-0.0137	0.0024	1.417e-08	717356	4.59763884942e-05	32.982862624774
BMI	rs12462975	19	30272202	A	G	0.3243	0.0193	0.0018	1.474e-25	717340	0.0001632471023598	117.122469816393
BMI	rs7245985	19	30710410	T	G	0.7956	0.0119	0.0021	1.876e-08	718665	4.60574176608e-05	33.1012865081413
BMI	rs11882409	19	34019685	A	C	0.303	0.0121	0.0019	3.309e-10	718526	6.184094862e-05	44.436953789613
BMI	rs185350	19	34306816	T	C	0.4902	0.0137	0.0016	9.104e-17	805076	9.38089485048e-05	75.5302308200869
BMI	rs429358	19	45411941	T	C	0.8459	0.0257	0.0026	2.599e-22	484680	0.0001721939569262	83.472996200589
BMI	rs11672660	19	46180184	T	C	0.1871	-0.0338	0.0021	6.831e-60	781854	0.0003475156019192	271.800223209901
BMI	rs9304665	19	47602577	A	T	0.7423	0.023	0.002	2.203e-31	717324	0.00020238557118	145.205010088885
BMI	rs3764625	19	49649051	T	G	0.3989	0.0096	0.0017	2.422e-08	712617	4.41960265728e-05	31.4961434805701
BMI	rs1884389	20	1410582	T	C	0.4386	-0.0108	0.0017	3.724e-10	718491	5.74405437312e-05	41.2727695552107
BMI	rs4813619	20	2815715	T	G	0.5305	-0.0106	0.0018	1.695e-09	664186	5.597095422e-05	37.1770930950321
BMI	rs1884897	20	6612832	A	G	0.3747	-0.0184	0.0017	2.701e-28	806711	0.0001586491550592	128.004008956517
BMI	rs2423668	20	12430673	T	C	0.4196	0.0106	0.0018	7.84e-09	557523	5.47273739648e-05	30.5133301746606
BMI	rs852056	20	17102860	T	C	0.2538	0.0123	0.0019	2.145e-10	718527	5.73042827448e-05	41.1769193730377
BMI	rs1409818	20	21381121	T	C	0.1074	0.0195	0.0028	2.589e-12	718603	7.290551502e-05	52.3937957955534
BMI	rs8122855	20	25192049	A	G	0.3377	0.0137	0.0018	4.108e-14	717822	8.39570065598e-05	60.2710786280994
BMI	rs4812405	20	35276585	A	C	0.0763	-0.0202	0.0033	1.279e-09	706013	5.75159392248e-05	40.6092214455529
BMI	rs742748	20	39293397	T	C	0.5864	-0.0113	0.0017	1.13e-11	805145	6.19385985152e-05	49.8725180581966
BMI	rs79186842	20	47689036	A	G	0.8597	0.0202	0.0028	2.596e-13	484680	9.84322318328e-05	47.7126337212816
BMI	rs17806224	20	51065854	A	G	0.1808	-0.026	0.0022	7.908e-32	718699	0.00020024655872	143.945425588505
BMI	rs1304549	20	54378256	A	G	0.2262	-0.0118	0.0021	1.352e-08	718225	4.87433457888e-05	35.0102985615583
BMI	rs6010784	20	61540319	T	C	0.5062	0.0106	0.0016	6.906e-11	803088	5.61713617632e-05	45.1129682898233
BMI	rs6512302	20	62691550	C	G	0.7391	0.0134	0.002	1.522e-11	718338	6.92495369528e-05	49.7478803942082
BMI	rs2064044	21	22119890	A	C	0.8062	-0.0123	0.0021	1.022e-08	718416	4.72755712248e-05	33.9650379424639
BMI	rs2832283	21	30690558	A	G	0.2254	0.0115	0.002	4.718e-09	806772	4.618033518e-05	37.2586296291732
BMI	rs13047416	21	40309436	C	G	0.6263	0.0152	0.0018	6.934e-18	717914	0.0001081490430848	77.6498935807813
BMI	rs8134638	21	40644170	T	C	0.6273	-0.0133	0.002	1.574e-11	484680	8.27118925038e-05	40.0919507160747
BMI	rs8126575	21	46435610	T	G	0.8673	0.0152	0.0025	5.879e-10	775870	5.31811152768e-05	41.2637199982302
BMI	rs427943	21	46570896	A	C	0.4288	-0.0177	0.0017	3.603e-25	742360	0.0001534685902848	113.946122897493
BMI	rs11538	22	18220831	A	G	0.8284	-0.0138	0.0023	1.094e-09	718441	5.41434022272e-05	38.9008379764249
BMI	rs2238799	22	20109325	A	G	0.6187	0.0102	0.0018	8.645e-09	714858	4.90882173048e-05	35.0927293091623
BMI	rs12628891	22	38317137	T	C	0.3186	-0.0115	0.0019	5.852e-10	718155	5.742137358e-05	41.2396997408029
BMI	rs12628051	22	40654276	T	C	0.6407	0.0161	0.0018	2.9e-19	715009	0.0001193421036542	85.3406242371022
BMI	rs28489620	22	41804716	A	G	0.2818	-0.0151	0.0021	1.423e-12	484680	9.22933223352e-05	44.7366717788487
BMI	rs9615337	22	48898559	C	G	0.575	-0.011	0.002	2.054e-08	484680	5.913875e-05	28.6649462815919
CAD	rs9970807	1	56965664	C	T	0.915097	0.12575	0.016695	5e-14		NA	56.7339655559493
CAD	rs7528419	1	109817192	A	G	0.78582	0.11453	0.011482	1.97e-23		NA	99.4954994345868
CAD	rs6689306	1	154395946	G	A	0.552455	-0.056012	0.0094061	2.6e-09		NA	35.4603466722965
CAD	rs67180937	1	222823743	G	T	0.663052	0.078807	0.0110551	1.01e-12		NA	50.8164403372083
CAD	rs16986953	2	19942473	G	A	0.895294	-0.08516	0.0150265	1.45e-08		NA	32.1185280664482
CAD	rs515135	2	21286057	C	T	0.791985	0.067499	0.0121924	3.09e-08		NA	30.6489974523076
CAD	rs7568458	2	85788175	T	A	0.551482	-0.059618	0.0095093	3.62e-10		NA	39.305896648147
CAD	rs17678683	2	145286559	T	G	0.912319	-0.098786	0.0166548	3e-09		NA	35.1813060104068
CAD	rs115654617	2	203893999	C	A	0.893038	-0.137846	0.0158314	3.12e-18		NA	75.8140491677371
CAD	rs1199338	3	138087467	A	C	0.838134	-0.073596	0.0124987	3.9e-09		NA	34.6719871807214
CAD	rs17087335	4	57838583	G	T	0.785363	-0.060764	0.0111159	4.59e-08		NA	29.881572471299
CAD	rs4593108	4	148281001	C	G	0.795349	0.07083	0.0115558	8.82e-10		NA	37.5694165082443
CAD	rs9349379	6	12903957	A	G	0.568394	-0.131836	0.0096527	1.81e-42		NA	186.539332293725
CAD	rs56336142	6	39134099	T	C	0.807262	0.066813	0.0118763	1.85e-08		NA	31.648973320949
CAD	rs12202017	6	134173151	A	G	0.699953	0.066813	0.0099612	1.98e-11		NA	44.9882008582893
CAD	rs10080815	6	160687412	T	G	0.972442	-0.246627	0.0308579	1.33e-15		NA	63.8775875214825
CAD	rs55730499	6	161005610	C	T	0.943757	-0.316641	0.0242403	5.39e-39		NA	170.631149325991
CAD	rs2107595	7	19049388	G	A	0.79953	-0.073415	0.0112951	8.05e-11		NA	42.2463746118652
CAD	rs11556924	7	129663496	C	T	0.686675	0.072569	0.0110605	5.34e-11		NA	43.0479779830018
CAD	rs3918226	7	150690176	C	T	0.935485	-0.133315	0.0221275	1.69e-09		NA	36.2988891999396
CAD	rs2891168	9	22098619	A	G	0.511332	-0.193401	0.0091877	2.29e-98		NA	443.102110511966
CAD	rs2519093	9	136141870	C	T	0.809128	-0.079704	0.0117524	1.19e-11		NA	45.9946274627943
CAD	rs2487928	10	30323892	G	A	0.581779	-0.062633	0.0095049	4.41e-11		NA	43.4221500749274
CAD	rs1870634	10	44480811	G	T	0.637485	0.075878	0.0097113	5.55e-15		NA	61.0487828091561
CAD	rs1412444	10	91002927	C	T	0.630869	-0.066812	0.0096809	5.15e-12		NA	47.6296594989335
CAD	rs11191416	10	104604916	T	G	0.87253	0.079249	0.0135252	4.65e-09		NA	34.3320858575294
CAD	rs10840293	11	9751196	A	G	0.549821	0.054714	0.009619	1.28e-08		NA	32.3546780534648
CAD	rs2128739	11	103673277	C	A	0.676464	-0.065565	0.0100568	7.05e-11		NA	42.5034814365612
CAD	rs2681472	12	90008959	A	G	0.798694	-0.074114	0.0113331	6.17e-11		NA	42.7664365271826
CAD	rs11065979	12	112059557	C	T	0.634501	-0.068556	0.0107672	1.93e-10		NA	40.5401526804974
CAD	rs11838776	13	111040681	G	A	0.736723	-0.068566	0.0107552	1.83e-10		NA	40.6425217790487
CAD	rs10139550	14	100145710	C	G	0.576967	-0.05538	0.0097569	1.38e-08		NA	32.2167847234644
CAD	rs56062135	15	67455630	C	T	0.794271	0.069743	0.0118937	4.52e-09		NA	34.3848623015204
CAD	rs4468572	15	79124475	C	T	0.585831	0.077234	0.0095277	4.44e-16		NA	65.7114283824976
CAD	rs8042271	15	89574218	A	G	0.097718	-0.096711	0.0175662	3.68e-08		NA	30.3107094606177
CAD	rs7212798	17	59013488	T	C	0.853484	-0.079961	0.0142216	1.88e-08		NA	31.6125489477418
CAD	rs663129	18	57838401	G	A	0.743165	-0.058163	0.0105173	3.2e-08		NA	30.5833513303444
CAD	rs56289821	19	11188247	G	A	0.899622	0.13361	0.0170415	4.44e-15		NA	61.4698693696777
CAD	rs4420638	19	45422946	A	G	0.833964	-0.091906	0.0140977	7.07e-11		NA	42.5002222000187
CAD	rs28451064	21	35593827	G	A	0.878814	-0.127571	0.015952	1.33e-15		NA	63.9548725516129
CAD	rs180803	22	24658858	T	G	0.029268	-0.180923	0.0283062	1.64e-10		NA	40.8530437494493
FI	rs12759838	1	109368122	A	T	0.192	0.026	0.0052	3.035e-07	38238	0.000209743872	8.02144913959359
FI	rs860598	12	102898446	A	G	0.136	0.026	0.0049	8.921e-08	38238	0.000158865408	6.07534290211689
glucose	rs10787312	10	113023966	A	G	0.078	0.042	0.0062	1.147e-11	46186	0.000253719648	11.7207620108437
glucose	rs4506565	10	114756041	A	T	0.296	-0.023	0.004	1.235e-08	46186	0.000220470272	10.1844444092771
glucose	rs12805422	11	45839889	A	G	0.5	-0.023	0.0037	1.179e-09	46186	0.0002645	12.2188998990233
glucose	rs7944584	11	47336320	A	T	0.288	0.025	0.0041	1.466e-09	46186	0.00025632	11.8409179440874
glucose	rs2524299	11	61604782	A	T	0.108	0.03	0.0052	3.605e-09	46186	0.0001734048	8.00991624112381
glucose	rs10830963	11	92708710	C	G	0.3	-0.079	0.0045	1.263e-68	46186	0.00262122	121.376579196923
glucose	rs17390909	12	97868654	C	G	0.117	0.037	0.0067	3.401e-08	46186	0.000282865518	13.0675574447176
glucose	rs780093	2	27742603	T	C	0.394	-0.027	0.0037	2.909e-13	46186	0.000348117912	16.083076454802
glucose	rs560887	2	169763148	T	C	0.326	-0.075	0.0041	4.61e-75	46186	0.002471895	114.444894442348
glucose	rs11717195	3	123082398	T	C	0.23	0.029	0.0047	1.106e-09	46186	0.0002978822	13.7614908279631
glucose	rs10276674	7	14922007	T	C	0.164	-0.036	0.0051	1.748e-12	46186	0.000355373568	16.4184075325777
glucose	rs2191349	7	15064309	T	G	0.467	0.03	0.0036	7.826e-17	46186	0.0004480398	20.7015452393887
glucose	rs6975024	7	44231886	T	C	0.2	-0.062	0.0049	5.542e-37	46186	0.00123008	56.8799816478254
glucose	rs11558471	8	118185733	A	G	0.252	0.027	0.004	2.616e-11	46186	0.000274827168	12.696107162088
glucose	rs560887		169780137	T	C	0.326	-0.075	0.0041	4.61e-75	46186	0.002471895	114.444894442348
hba1c	rs267738	1	149207249	G	T	0.214	-0.011	0.0019	2.594e-09	46368	4.0705368e-05	1.88742192089186
hba1c	rs2246434	1	156885079	A	G	0.31	0.019	0.0018	1.985e-27	46368	0.0001544358	7.16167632201213
hba1c	rs17509001	2	23874735	C	T	0.155	0.018	0.0023	1.935e-15	46368	8.48718e-05	3.93549989175971
hba1c	rs12621844	2	48268239	C	T	0.373	-0.0099	0.0018	1.865e-08	46368	4.584339342e-05	2.12567222733992
hba1c	rs560887	2	169471394	C	T	0.674	0.028	0.0018	1.48e-58	46368	0.000344527232	15.9798551341691
hba1c	rs7616006	3	12242648	A	G	0.562	0.01	0.0017	5.068e-10	46368	4.92312e-05	2.28276620251947
hba1c	rs9818758	3	49357929	A	G	0.168	0.012	0.002	7.735e-10	46368	4.0255488e-05	1.8665610959358
hba1c	rs11708067	3	124548468	A	G	0.774	0.013	0.0019	1.419e-12	46368	5.9124312e-05	2.74151994067233
hba1c	rs8192675	3	172207577	C	T	0.296	-0.011	0.0017	1.378e-11	46368	5.0428928e-05	2.33830559389244
hba1c	rs13134327	4	144879245	A	G	0.31	0.013	0.0017	2.636e-15	46368	7.22982e-05	3.35242071518335
hba1c	rs1800562	6	26201120	A	G	0.053	-0.04	0.0036	4.669e-28	46368	0.0001606112	7.44809514669923
hba1c	rs11964178	6	109668728	A	G	0.585	0.0096	0.0016	6.379e-10	46368	4.4748288e-05	2.07489196927141
hba1c	rs1547247	6	135432529	A	G	0.252	-0.014	0.0017	1.73e-17	46368	7.3890432e-05	3.42625693771727
hba1c	rs592423	6	139882386	A	C	0.451	0.0091	0.0017	3.959e-08	46368	4.100734638e-05	1.90142459463205
hba1c	rs2979422	7	44128880	C	T	0.133	0.015	0.0023	1.097e-10	46368	5.188995e-05	2.40605427173586
hba1c	rs4607517	7	44202193	A	G	0.195	0.031	0.0024	8.755e-38	46368	0.00030170595	13.9931198852284
hba1c	rs6474359	8	41668351	C	T	0.032	-0.044	0.0053	1.504e-16	46368	0.000119939072	5.56176208493515
hba1c	rs4737009	8	41749562	A	G	0.27	0.021	0.002	4.484e-27	46368	0.0001738422	8.06176892084509
hba1c	rs13266634	8	118253964	C	T	0.761	0.015	0.0017	4.533e-20	46368	8.184555e-05	3.79516138837117
hba1c	rs2383208	9	22122076	A	G	0.792	0.014	0.0021	7.042e-12	46368	6.4576512e-05	2.99434791993638
hba1c	rs7040409	9	90693056	C	G	0.955	0.028	0.0037	2.563e-14	46368	6.73848000000001e-05	3.12457418560659
hba1c	rs579459	9	135143989	C	T	0.204	0.011	0.0019	9.422e-09	46368	3.9296928e-05	1.82211296709008
hba1c	rs4745982	10	70759849	G	T	0.085	-0.095	0.0056	2.87e-65	46368	0.00140383875	65.1818923487776
hba1c	rs17747324	10	114742493	C	T	0.192	0.015	0.0023	6.122e-11	46368	6.98112e-05	3.23709208448293
hba1c	rs3782123	11	195198	A	C	0.677	-0.013	0.002	1.509e-10	46368	7.3910798e-05	3.42720136725596
hba1c	rs11603334	11	72110633	A	G	0.129	-0.012	0.0021	6.853e-09	46368	3.2359392e-05	1.50042412228434
hba1c	rs1387153	11	92313476	C	T	0.728	-0.019	0.0019	2.109e-24	46368	0.000142967552	6.62978135964328
hba1c	rs12368284	12	46659448	A	G	0.612	0.012	0.002	2.924e-10	46368	6.8387328e-05	3.17106371062209
hba1c	rs10774625	12	110394602	A	G	0.456	-0.0088	0.0016	1.464e-08	46368	3.842015232e-05	1.78145722632711
hba1c	rs423117	13	112394108	C	T	0.879	-0.019	0.0027	1.298e-12	46368	7.6791198e-05	3.56077412257868
hba1c	rs11248914	16	233563	C	T	0.314	-0.014	0.0019	2.563e-14	46368	8.4438368e-05	3.91539998067244
hba1c	rs9935401	16	52374339	A	G	0.45	0.0099	0.0018	1.865e-08	46368	4.851495e-05	2.24955330866629
hba1c	rs837763	16	87381230	C	T	0.482	-0.017	0.0016	1.679e-28	46368	0.000144312728	6.69216971171534
hba1c	rs9914988	17	24207230	A	G	0.805	0.013	0.002	2.765e-11	46368	5.305755e-05	2.46019689531978
hba1c	rs1046896	17	78278822	C	T	0.686	-0.028	0.0017	4.456e-64	46368	0.000337753472	15.6655685829317
hba1c	rs17533903	19	17117523	A	G	0.265	0.015	0.0022	5.267e-12	46368	8.764875e-05	4.06427817140137
hba1c	rs855791	22	35792882	A	G	0.412	0.017	0.0016	3.439e-28	46368	0.000140023968	6.4932605123902
HDL	rs13303368	1	914852	G	C	0.409	0.0110648	0.00152652	4.22e-13	1118486	5.91872171882995e-05	66.2038738526984
HDL	rs2377037	1	1838516	A	C	0.27	0.00975633	0.00167516	5.74e-09	1230030	3.75223113721604e-05	46.155225463217
HDL	rs55775305	1	2975119	G	C	0.17	-0.0126192	0.00186465	1.31e-11	1238792	4.4938715678208e-05	55.6721334291827
HDL	rs1767141	1	23734350	A	C	0.0932	-0.0226049	0.00239923	4.44e-21	1244411	8.63699363886804e-05	107.488809973181
HDL	rs282178	1	26899687	A	C	0.223	0.0113595	0.0019245	3.58e-09	1153173	4.47171698527155e-05	51.5688494892275
HDL	rs75460349	1	27180088	C	A	0.0237	-0.0872946	0.0044924	4.17e-84	1239787	0.000352643911140825	437.356862608323
HDL	rs6687671	1	28366015	G	A	0.285	-0.0115896	0.0015216	2.6e-14	1244538	5.4741638416608e-05	68.1316693476598
HDL	rs148433005	1	31533632	T	C	0.0696	-0.015308	0.00276253	3e-08	1244542	3.03491019192115e-05	37.7718176432788
HDL	rs9787203	1	39288581	A	T	0.123	-0.0132461	0.00225882	4.51e-09	1209862	3.78539112207358e-05	45.7996667260376
HDL	rs141239468	1	39677475	T	C	0.029	0.0269093	0.00432551	4.94e-10	1237303	4.07804509990638e-05	50.4597505729783
HDL	rs3768321	1	40035928	T	G	0.193	-0.0443841	0.00177404	3.83e-138	1244479	0.000613642845566981	764.133312462912
HDL	rs9437006	1	56983656	T	C	0.126	-0.0146193	0.00208251	2.22e-12	1244535	4.70722686830575e-05	58.5857495250743
HDL	rs1168124	1	63139730	C	T	0.337	-0.0122399	0.00148193	1.46e-16	1232115	6.69466984574926e-05	82.491420004777
HDL	rs6700896	1	66089782	T	C	0.388	0.00922409	0.00141503	7.09e-11	1241911	4.04073348782506e-05	50.1842606635396
HDL	rs2613496	1	72754788	T	C	0.184	0.0141294	0.0017951	3.52e-15	1244518	5.99494796119757e-05	74.6125595528952
HDL	rs11161570	1	85721911	T	C	0.499	0.0090078	0.00137593	5.88e-11	1244281	4.05700681390783e-05	50.482531893783
HDL	rs4847419	1	93845655	T	A	0.362	0.0258976	0.00144843	1.7e-71	1230391	0.000309797766480773	381.289886857842
HDL	rs646776	1	109818530	C	T	0.22	0.0346789	0.00165086	5.71e-98	1244544	0.000412741279308072	513.885959180837
HDL	rs139197821	1	110225083	C	T	0.0755	-0.0321879	0.0033073	2.19e-22	1029881	0.000144633584504383	148.976638401009
HDL	rs17025216	1	110486839	T	C	0.182	0.0102467	0.00178969	1.03e-08	1244512	3.12624298197193e-05	38.9076228817686
HDL	rs75246752	1	145630111	C	G	0.0092	0.0617377	0.00771495	1.22e-15	1216322	6.94871841629096e-05	84.5245252122799
HDL	rs267738	1	150940625	G	T	0.213	0.0223838	0.00168682	3.46e-40	1243711	0.000167977829357039	208.950637246301
HDL	rs145904381	1	151017991	C	T	0.0125	0.0508605	0.00641839	2.3e-15	1232870	6.38613894874219e-05	78.7376918329843
HDL	rs4656984	1	161078909	T	C	0.39	-0.0103285	0.00145299	1.17e-12	1231982	5.075735064855e-05	62.5352149738349
HDL	rs149244576	1	161608819	G	A	0.486	-0.0108705	0.00169979	1.6e-10	1009633	5.9037563359062e-05	59.6096733416398
HDL	rs76166162	1	172380926	A	G	0.0624	-0.0191708	0.00285952	2.03e-11	1244543	4.30043766431465e-05	53.5230116355897
HDL	rs7521870	1	174466377	A	T	0.381	-0.00875515	0.00146654	2.37e-09	1232090	3.61553693648298e-05	44.548207386867
HDL	rs10913570	1	178523126	A	C	0.481	0.0181662	0.00138062	1.53e-39	1243421	0.000164767143406198	204.90835885194
HDL	rs1689797	1	182150978	A	C	0.326	-0.0260934	0.00147195	2.59e-70	1243700	0.000299204992597395	372.232024563549
HDL	rs17849502	1	183532580	T	G	0.0476	-0.0178945	0.00324307	3.43e-08	1233311	2.90332377958095e-05	35.8079930946906
HDL	rs10911505	1	184049978	C	T	0.359	-0.00881276	0.00144326	1.02e-09	1233331	3.57442640639346e-05	44.0860132758084
HDL	rs6675366	1	198517308	C	T	0.0401	-0.0218051	0.00354887	8.03e-10	1239082	3.66029868153461e-05	45.3556890568476
HDL	rs12143329	1	202197659	T	C	0.405	0.00957002	0.00141098	1.18e-11	1229911	4.41395270456528e-05	54.2899979040226
HDL	rs3862948	1	205099959	A	C	0.234	-0.012452	0.00163363	2.49e-14	1244532	5.5584390356352e-05	69.1802866742502
HDL	rs3747973	1	205677148	A	G	0.412	-0.0156362	0.00141729	2.66e-28	1232009	0.000118458702477185	145.95924080509
HDL	rs12031785	1	219686440	C	T	0.43	0.0163018	0.00139476	1.47e-31	1244541	0.000130270004524248	162.147224080218
HDL	rs2642438	1	220970028	A	G	0.294	-0.0271768	0.00151587	7.11e-72	1231282	0.000306604598212255	377.631893361721
HDL	rs12138866	1	224432260	G	A	0.0395	-0.0252312	0.00363678	3.98e-12	1209558	4.83059105403005e-05	58.4315265175764
HDL	rs10864727	1	230297939	A	G	0.39	-0.0512387	0.00140582	7.52e-291	1243686	0.0012491674029049	1555.51260795905
HDL	rs553427	1	234852760	C	T	0.473	-0.0171565	0.00139696	1.14e-34	1241080	0.0001467435903973	182.146970583543
HDL	rs2673962	1	235027671	C	T	0.155	-0.0108956	0.00193601	1.82e-08	1231274	3.1097158327352e-05	38.2902510460345
HDL	rs6710091	2	239597	G	C	0.351	0.0158945	0.00145766	1.1e-27	1238792	0.000115100060071639	142.601216824769
HDL	rs10188334	2	653874	T	C	0.169	0.0130835	0.00185478	1.74e-12	1243663	4.80801264896355e-05	59.798253297809
HDL	rs6542680	2	3640142	C	T	0.192	0.0226427	0.00177231	2.24e-37	1216641	0.000159073929806715	193.566338244215
HDL	rs1107850	2	20371772	A	G	0.485	-0.0132386	0.00138071	8.96e-22	1244494	8.7551397741518e-05	108.966554252269
HDL	rs676210	2	21231524	A	G	0.214	0.0604574	0.00167161	2e-286	1244544	0.00122960394382298	1532.17772322446
HDL	rs2362541	2	30478453	T	G	0.497	0.00889071	0.00137824	1.11e-10	1241828	3.95209393470125e-05	49.0800697160016
HDL	rs62136301	2	32674374	G	A	0.193	0.0111928	0.0017719	2.67e-10	1244395	3.90245879857037e-05	48.563819300333
HDL	rs12998038	2	42602387	T	C	0.256	0.0100034	0.00160702	4.82e-10	1244432	3.81187075075277e-05	47.4378714539394
HDL	rs17326656	2	48962291	T	G	0.231	-0.0162522	0.00164376	4.73e-23	1244544	9.38410009715456e-05	116.800027662639
HDL	rs12997031	2	50689260	A	G	0.424	-0.00809155	0.00140523	8.5e-09	1232970	3.19802445096883e-05	39.4318791537582
HDL	rs805317	2	54135004	A	T	0.449	0.010611	0.0013919	2.47e-14	1244543	5.5710950044158e-05	69.3384243884037
HDL	rs17049712	2	58961136	T	C	0.295	-0.0120282	0.00151647	2.16e-15	1244539	6.0178645740078e-05	74.8990585573306
HDL	rs980183	2	59311536	G	A	0.391	-0.00857423	0.00140909	1.17e-09	1244528	3.50117891102025e-05	43.5746074791315
HDL	rs17432483	2	63023836	C	T	0.0611	-0.0178632	0.00292584	1.03e-09	1243712	3.66107871369682e-05	45.53486913752
HDL	rs2540949	2	65284231	T	A	0.383	0.0164761	0.00142071	4.26e-31	1243669	0.000128298852495013	159.58152311221
HDL	rs7586605	2	85561141	C	T	0.27	-0.0121958	0.00156389	6.27e-15	1243876	5.8632337337688e-05	72.935516353378
HDL	rs56304923	2	86846399	C	T	0.189	0.00975366	0.0017658	3.32e-08	1244467	2.91640530259883e-05	36.294701749593
HDL	rs4851250	2	100729293	C	T	0.172	0.0147729	0.00182499	5.74e-16	1244436	6.21613296263491e-05	77.3604809025896
HDL	rs4851057	2	105939237	T	C	0.123	-0.0113803	0.00207812	4.34e-08	1244545	2.79410113705928e-05	34.7747617562053
HDL	rs3789112	2	111714577	T	C	0.292	-0.00942658	0.00151565	4.99e-10	1244511	3.67412916487675e-05	45.7265481809588
HDL	rs11688682	2	121347612	C	G	0.257	0.0177778	0.00180355	6.39e-23	1112260	0.000120700193107942	134.265961313311
HDL	rs3739020	2	136602491	G	T	0.216	0.01843	0.00174024	3.3e-26	1181105	0.0001150404256512	135.890224727204
HDL	rs1484917	2	146349854	A	G	0.4	-0.0083705	0.00141359	3.19e-09	1232109	3.363132972e-05	41.4387904089435
HDL	rs2598503	2	147806204	C	T	0.383	-0.00836493	0.00144303	6.76e-09	1232012	3.30703320606416e-05	40.7443272304622
HDL	rs78640029	2	160281450	C	T	0.0155	-0.0345739	0.0059539	6.36e-09	1233313	3.64816235308486e-05	44.9948290828698
HDL	rs76840964	2	160754947	G	A	0.128	0.0128567	0.00210941	1.09e-09	1244348	3.68990742589645e-05	45.916909749308
HDL	rs2111485	2	163110536	A	G	0.391	0.0090698	0.00140671	1.14e-10	1243959	3.91759436737855e-05	48.7350986080892
HDL	rs13389219	2	165528876	T	C	0.4	0.0290173	0.00140455	8.02e-95	1241815	0.0004041617756592	502.09627523883
HDL	rs3754749	2	173906149	G	A	0.171	0.0132228	0.00183726	6.15e-13	1244425	4.95709788585571e-05	61.6903242738626
HDL	rs10497442	2	176436826	C	T	0.307	0.00867667	0.0014872	5.4e-09	1244541	3.20337488431315e-05	39.8685268898592
HDL	rs13005431	2	178121112	C	T	0.366	-0.00813641	0.00143145	1.32e-08	1244486	3.0723167510035e-05	38.2356651163026
HDL	rs111917980	2	188276584	A	G	0.324	0.0102527	0.00148404	4.89e-12	1244527	4.60466671501699e-05	57.3088673174033
HDL	rs7581601	2	203497786	C	A	0.315	-0.0175099	0.0014891	6.37e-32	1243527	0.000132311761871215	164.554756210622
HDL	rs2551968	2	208536536	A	C	0.473	0.00832328	0.0013784	1.56e-09	1243711	3.45374891278407e-05	42.9560696604864
HDL	rs1047891	2	211540507	A	C	0.308	-0.0164194	0.00150676	1.19e-27	1233801	0.00011492152295077	141.806356697613
HDL	rs13425618	2	215350167	G	A	0.232	0.0096162	0.00162333	3.15e-09	1243704	3.29523335670989e-05	40.9842336882075
HDL	rs78058190	2	219699999	A	G	0.0522	-0.0808669	0.00357485	2.69e-113	1211389	0.000647081215895375	784.373326125435
HDL	rs3768897	2	225338022	A	G	0.131	0.0112583	0.00206087	4.68e-08	1216369	2.88580314262374e-05	35.1029701144529
HDL	rs2943645	2	227099180	C	T	0.364	0.0372461	0.0014305	1.88e-149	1243616	0.000642318018067952	799.309090352296
HDL	rs11694828	2	228565656	A	G	0.451	0.0145721	0.00144206	5.25e-24	1220452	0.000105153363240435	128.347918382072
HDL	rs989326	2	230020848	A	G	0.351	-0.00907811	0.00143903	2.82e-10	1243685	3.75467793578464e-05	46.6980445532798
HDL	rs4675812	2	242395674	G	A	0.41	-0.0133286	0.00140445	2.3e-21	1235547	8.5947833417048e-05	106.201543631847
HDL	rs13076933	3	12327431	G	T	0.257	-0.0132144	0.00158927	9.19e-17	1244403	6.66878675355187e-05	82.9919836074764
HDL	rs12485478	3	12351223	G	A	0.0271	-0.0536649	0.00421086	3.35e-37	1239914	0.000151861658581048	188.323691962756
HDL	rs13323506	3	12737231	A	C	0.307	-0.00839824	0.00153031	4.07e-08	1202496	3.0010841194899e-05	36.088939531252
HDL	rs2455850	3	15782711	A	C	0.316	-0.0136177	0.00151429	2.41e-19	1212408	8.01642446462275e-05	97.1994031112846
HDL	rs9867989	3	24291197	C	T	0.119	-0.0162023	0.00212834	2.69e-14	1244534	5.50435206337566e-05	68.5071936985003
HDL	rs11706926	3	36978647	A	G	0.448	-0.0126115	0.00139048	1.19e-19	1241826	7.8664824091392e-05	97.695551715859
HDL	rs2305637	3	47045846	T	C	0.172	-0.0200748	0.0018464	1.56e-27	1222247	0.000114786610990433	140.313467457408
HDL	rs7634917	3	50049299	G	T	0.478	0.0219633	0.00141102	1.25e-54	1212408	0.000240726323267611	291.928313517161
HDL	rs2240921	3	52830764	T	C	0.116	0.0262069	0.00215283	4.32e-34	1244349	0.00014085476810152	175.296899526954
HDL	rs76824303	3	62459819	C	A	0.0968	0.0164648	0.00240743	7.97e-12	1214971	4.74026041595077e-05	57.5954247461935
HDL	rs10510998	3	70516421	G	A	0.438	0.00929017	0.00141168	4.68e-11	1234716	4.2490099110111e-05	52.4653494905413
HDL	rs35540156	3	71522178	G	A	0.476	0.00951104	0.00137685	4.92e-12	1244542	4.51257311568724e-05	56.1633118644861
HDL	rs13066793	3	87037543	G	A	0.0909	0.0180945	0.00245326	1.63e-13	1237373	5.4112638502292e-05	66.961033054395
HDL	rs7640424	3	107820063	T	C	0.308	0.00918302	0.00150073	9.41e-10	1244497	3.59466039694095e-05	44.7369770493071
HDL	rs73216701	3	108865293	G	A	0.432	0.00881347	0.00138951	2.26e-10	1244538	3.81202674806286e-05	47.443853781668
HDL	rs3732356	3	119529113	G	T	0.0679	0.0300666	0.00277828	2.71e-27	1241787	0.000114427633852828	142.110780704315
HDL	rs72964564	3	123054770	C	A	0.234	-0.0124089	0.00163387	3.08e-14	1241701	5.52002687471945e-05	68.5459022553487
HDL	rs1225053	3	131642852	C	T	0.263	-0.00910267	0.00157704	7.83e-09	1244516	3.21211310308316e-05	39.9764813535001
HDL	rs6762415	3	133478557	T	G	0.48	0.00776989	0.00138617	2.08e-08	1244399	3.01372983535603e-05	37.503893925316
HDL	rs1154988	3	135925191	T	A	0.22	0.0260492	0.00167695	2.05e-54	1241824	0.000232882073643648	289.265447193478
HDL	rs59510635	3	142792591	A	G	0.384	0.00812315	0.00141348	9.09e-09	1244498	3.12169794111437e-05	38.8506188082181
HDL	rs11929253	3	150074251	A	G	0.179	-0.0126242	0.00181817	3.83e-12	1244542	4.68418367632575e-05	58.2992703702506
HDL	rs7631198	3	152166060	G	A	0.357	0.00936142	0.00147166	2e-10	1205260	4.02339475379381e-05	48.4942382563181
HDL	rs10049088	3	156797648	T	C	0.384	0.0211283	0.00141853	3.58e-50	1235428	0.000211188877446328	260.963342663399
HDL	rs6790951	3	160025287	T	C	0.48	-0.00837637	0.00141032	2.86e-09	1230414	3.50256563289485e-05	43.0974973731458
HDL	rs79287178	3	172294500	A	G	0.0293	-0.0267289	0.00423376	2.73e-10	1237222	4.06391689265123e-05	50.2816359831582
HDL	rs9942052	3	173718980	C	A	0.258	0.00919977	0.0015841	6.34e-09	1244465	3.24046657859499e-05	40.3277144040878
HDL	rs7620978	3	184057340	T	C	0.267	-0.0101823	0.00160809	2.42e-10	1220373	4.05823328528384e-05	49.5275120679313
HDL	rs1516725	3	185824004	T	C	0.134	-0.0300388	0.00204187	5.45e-49	1243712	0.000209419850258559	260.512118373893
HDL	rs938587	3	185884216	A	T	0.264	-0.014181	0.00157845	2.61e-19	1231255	7.8149364530688e-05	96.2291597741889
HDL	rs35374654	3	185926247	T	A	0.226	0.020508	0.00172162	1.02e-32	1216701	0.000147138394534272	179.049482544858
HDL	rs7617124	3	194502841	G	C	0.333	0.00869136	0.00151511	9.67e-09	1228411	3.35564137824026e-05	41.2223839734011
HDL	rs4916497	3	196198533	T	C	0.284	-0.0107816	0.0015386	2.43e-12	1233912	4.72745919295693e-05	58.3353495076579
HDL	rs1051613	4	951179	G	A	0.462	-0.0133651	0.00140571	1.95e-21	1235568	8.87970774115471e-05	109.724392954491
HDL	rs2071659	4	2252624	G	A	0.141	0.0113763	0.00198913	1.07e-08	1238792	3.13504908169822e-05	38.8378921061492
HDL	rs71603401	4	18034463	G	A	0.125	-0.0139387	0.00209732	3.01e-11	1240465	4.25003594946875e-05	52.7223641592887
HDL	rs73243877	4	26047616	G	A	0.163	-0.021443	0.0018514	5.08e-31	1243572	0.000125462561266638	156.041054624729
HDL	rs2376180	4	37154148	T	A	0.488	-0.00866275	0.00139591	5.44e-10	1214223	3.7500006328832e-05	45.5350027474919
HDL	rs12506484	4	38402147	T	C	0.091	-0.0140421	0.00239328	4.43e-09	1243659	3.26211595383656e-05	40.5708568763999
HDL	rs10938398	4	45186139	A	G	0.427	-0.00978823	0.00139378	2.17e-12	1244533	4.68835861853023e-05	58.3508120941083
HDL	rs7684939	4	55509189	A	G	0.483	0.0102585	0.00139398	1.85e-13	1232045	5.25575842417395e-05	64.7566072127842
HDL	rs1620509	4	57946388	T	A	0.415	-0.00852856	0.00139704	1.03e-09	1244522	3.53171277863165e-05	43.9544242166434
HDL	rs35662434	4	69339933	G	A	0.221	0.0151227	0.00173239	2.56e-18	1192686	7.87441683653422e-05	93.924305693991
HDL	rs7686914	4	69537915	C	T	0.472	0.0112567	0.00152115	1.36e-13	1131191	6.31579609986125e-05	71.4481032605786
HDL	rs6825004	4	77110365	G	C	0.299	-0.00859675	0.00152602	1.77e-08	1215055	3.09804553395789e-05	37.6440614318853
HDL	rs6831339	4	83906408	T	C	0.248	-0.0120156	0.00159719	5.35e-14	1238720	5.38505869761331e-05	66.7092837319874
HDL	rs28432336	4	87984331	G	A	0.378	0.0152791	0.00144298	3.37e-26	1234705	0.00010977608210876	135.555738685832
HDL	rs2167750	4	89730074	T	C	0.464	-0.0190136	0.00137788	2.58e-43	1244542	0.000179821440454984	223.835225876587
HDL	rs2571037	4	96138183	G	A	0.335	-0.00910183	0.00146747	5.56e-10	1244493	3.69108364804024e-05	45.9368993717136
HDL	rs1133483	4	100023923	G	C	0.427	0.0112836	0.00139756	6.82e-16	1244502	6.23028418745443e-05	77.5407177199453
HDL	rs13107325	4	103188709	T	C	0.0639	-0.0827466	0.00277092	6.04e-196	1244544	0.000819131099716248	1020.27879919786
HDL	rs62329754	4	105827355	A	G	0.0972	-0.0131662	0.00230563	1.13e-08	1244520	3.04234672051329e-05	37.8637045043699
HDL	rs148827772	4	110766064	G	A	0.0207	-0.0332212	0.00533966	4.92e-10	1231856	4.47452281848485e-05	55.122054769337
HDL	rs2271577	4	119147975	G	A	0.173	0.0104938	0.00185955	1.67e-08	1215050	3.15099108108985e-05	38.2872605391253
HDL	rs72712556	4	140900251	A	G	0.329	0.00819914	0.00148039	3.05e-08	1231624	2.96814434766747e-05	36.5574038541452
HDL	rs62328321	4	143319721	C	T	0.371	-0.0105435	0.00142418	1.33e-13	1241852	5.18828895401355e-05	64.4341094031981
HDL	rs930457	4	143785362	C	T	0.353	-0.00985597	0.00146606	1.78e-11	1244425	4.43718695493596e-05	55.2198252271042
HDL	rs12646702	4	146402927	A	G	0.488	0.00893635	0.00141928	3.05e-10	1202541	3.99061764560691e-05	47.9906486525983
HDL	rs2290846	4	151199080	A	G	0.277	-0.0105927	0.00154171	6.39e-12	1244541	4.49429325849632e-05	55.9357462928322
HDL	rs10029272	4	154379305	T	C	0.273	0.00877158	0.00154986	1.52e-08	1243818	3.05409618757604e-05	37.9884972417068
HDL	rs1425485	4	157681890	T	C	0.228	0.0185608	0.00164077	1.14e-29	1244539	0.000121276184522772	150.951005619429
HDL	rs4282116	4	177968578	A	C	0.199	-0.00965998	0.00173878	2.77e-08	1219979	2.97487034653803e-05	36.2938137014857
HDL	rs62340875	4	185782590	A	G	0.182	0.0101042	0.00183013	3.37e-08	1206074	3.03989480520253e-05	36.6644346352461
HDL	rs61731455	5	665295	G	A	0.189	0.0113769	0.001768	1.24e-10	1240488	3.96789832949744e-05	49.2231763972436
HDL	rs76086106	5	39491186	A	G	0.0422	0.0274271	0.0035251	7.22e-15	1239915	6.08102878639362e-05	75.4040517983327
HDL	rs2910953	5	39533318	A	T	0.246	0.00928738	0.00160711	7.52e-09	1244543	3.19980033414199e-05	39.8241013682628
HDL	rs7707821	5	52813375	A	G	0.401	-0.0084696	0.00142724	2.95e-09	1241904	3.44609297782157e-05	42.7985724920269
HDL	rs1664781	5	53276301	G	A	0.312	0.0144373	0.00148264	2.08e-22	1244541	8.94839177403725e-05	111.376191878678
HDL	rs154255	5	55819966	C	T	0.447	0.0101966	0.00137997	1.48e-13	1244522	5.14012186595359e-05	63.9731329431604
HDL	rs28650790	5	55861464	T	C	0.18	-0.0302227	0.00178037	1.25e-64	1244517	0.000269639102929608	335.660415355727
HDL	rs12234004	5	67707704	A	G	0.274	-0.0100516	0.00154219	7.14e-11	1244543	4.01964384301709e-05	50.0281266328353
HDL	rs13159670	5	72971425	A	G	0.26	-0.0117331	0.00160988	3.14e-13	1238891	5.2973736582728e-05	65.632056316502
HDL	rs2307111	5	75003678	C	T	0.394	0.0161161	0.00141122	3.32e-30	1244543	0.000124027716725793	154.376725594426
HDL	rs115912456	5	82815158	G	A	0.0423	0.0287502	0.00342512	4.7e-17	1244469	6.69701992183209e-05	83.3477847283738
HDL	rs4489042	5	92428154	C	G	0.373	0.00909916	0.00143334	2.18e-10	1234697	3.87265645103428e-05	47.8173473696853
HDL	rs25863	5	96105926	A	G	0.45	0.00940067	0.00138179	1.02e-11	1244507	4.37444352422055e-05	54.4425499397012
HDL	rs11742162	5	112385510	C	T	0.338	-0.0101592	0.00147214	5.16e-12	1244501	4.61874202385357e-05	57.4828532841386
HDL	rs12234017	5	118711834	G	A	0.257	0.0163739	0.00158234	4.28e-25	1244459	0.000102389683411301	127.432606033166
HDL	rs12658172	5	124205385	C	G	0.152	0.0108035	0.00196267	3.7e-08	1244543	3.0088351113152e-05	37.4473133106244
HDL	rs664732	5	131281458	C	G	0.0425	-0.0240947	0.00340616	1.51e-12	1241310	4.72498849104249e-05	58.6544315535301
HDL	rs72801474	5	132444128	A	G	0.0955	0.0257732	0.00240386	8.06e-27	1244360	0.000114756852005423	142.814995847107
HDL	rs254559	5	134444982	A	C	0.408	-0.0109635	0.00139773	4.37e-15	1244452	5.8064448756672e-05	72.2624991374187
HDL	rs11748112	5	141685514	C	G	0.285	0.0107592	0.0015336	2.29e-12	1243630	4.7178144760032e-05	58.6748299812517
HDL	rs258763	5	142652361	T	A	0.437	0.00798042	0.00139435	1.04e-08	1233905	3.13380034615981e-05	38.6692683029403
HDL	rs13178930	5	144490411	G	A	0.312	-0.00855679	0.00150263	1.24e-08	1243641	3.14336472600514e-05	39.0933384910554
HDL	rs1438588	5	153444950	A	G	0.367	0.0117196	0.00143526	3.2e-16	1238213	6.38153783032675e-05	79.0219461996582
HDL	rs1650527	5	158022724	T	C	0.228	-0.0206524	0.00164361	3.28e-36	1243682	0.000150149260959544	186.76567559833
HDL	rs7732603	5	158614357	C	A	0.277	0.0112562	0.00154623	3.34e-13	1243593	5.07494878808345e-05	63.114809427471
HDL	rs4867646	5	170580152	T	C	0.299	0.0106758	0.00154552	4.93e-12	1231214	4.77771302588767e-05	58.8265866657859
HDL	rs6882591	5	176546460	A	G	0.147	0.0165661	0.00196558	3.51e-17	1243705	6.88235259958222e-05	85.6019171773542
HDL	rs57817879	5	180220261	C	G	0.177	-0.0124395	0.00181243	6.72e-12	1241917	4.50825991095555e-05	55.9912803055873
HDL	rs138354839	5	180416174	A	C	0.0112	-0.0623005	0.00810901	1.56e-14	1010434	8.59685378605133e-05	86.8728299776471
HDL	rs1240811	6	16818805	T	C	0.309	0.011396	0.00148576	1.72e-14	1243691	5.5458919447008e-05	68.9774734842756
HDL	rs76716928	6	31295941	G	C	0.367	-0.0201802	0.00154547	5.75e-39	1227424	0.000189212882600169	232.2880066702
HDL	rs72847238	6	31505421	G	A	0.0248	0.025186	0.00450338	2.24e-08	1169104	3.06827136617523e-05	35.8723225675837
HDL	rs28362673	6	32351510	A	G	0.0283	-0.0467615	0.0045331	5.99e-25	1139352	0.00012026119130832	137.036068437976
HDL	rs10947433	6	33689629	A	G	0.0615	0.0214638	0.0029311	2.43e-13	1235650	5.31805242469966e-05	65.7159032309381
HDL	rs147627829	6	34335088	A	G	0.0357	-0.0465573	0.00385967	1.67e-33	1233228	0.000149240244253343	184.07442077109
HDL	rs9296128	6	34745682	A	G	0.315	-0.0290644	0.00149522	3.67e-84	1243709	0.000364547265353208	453.555328105189
HDL	rs998584	6	43757896	A	C	0.478	-0.0305272	0.00142517	8.69e-102	1186417	0.000465052881098235	552.002424245931
HDL	rs36184164	6	43781092	G	T	0.111	-0.0146602	0.00226001	8.77e-11	1210115	4.24164703000063e-05	51.3308993997214
HDL	rs1317840	6	43806921	A	C	0.449	0.0104291	0.00140974	1.38e-13	1225535	5.38172620133344e-05	65.9583802664205
HDL	rs4714902	6	46044237	C	A	0.351	0.00884715	0.00151447	5.17e-09	1197319	3.56605954144848e-05	42.6985597759496
HDL	rs34724718	6	56557822	C	T	0.223	-0.00977864	0.00165927	3.78e-09	1244537	3.31369699020969e-05	41.2414854549684
HDL	rs34882981	6	76383886	A	T	0.485	0.0106105	0.00170961	5.42e-10	975729	5.62406929053875e-05	54.8786489797394
HDL	rs9342045	6	86425148	C	T	0.452	-0.00942221	0.00140629	2.08e-11	1234724	4.39799314278129e-05	54.3053772391791
HDL	rs570208294	6	98584715	A	T	0.479	0.0113312	0.00159017	1.03e-12	913095	6.40848013655859e-05	58.5191337203675
HDL	rs11153046	6	107441753	A	G	0.323	0.00982535	0.00152572	1.2e-10	1190669	4.22199044719294e-05	50.2719694756276
HDL	rs2806364	6	109192655	C	G	0.182	-0.010957	0.00181306	1.51e-09	1244545	3.5746869151448e-05	44.4901061563539
HDL	rs11759230	6	109640321	C	A	0.342	-0.0173729	0.00145291	5.95e-33	1244538	0.000135839675355618	169.080334026062
HDL	rs9374588	6	116311701	A	G	0.324	0.0136113	0.00147532	2.81e-20	1244419	8.11560524476291e-05	101.00016809366
HDL	rs34539692	6	126747110	C	A	0.307	-0.0100027	0.00151207	3.71e-11	1234722	4.25731802099096e-05	52.5681950640213
HDL	rs72959041	6	127454893	A	G	0.0523	-0.046877	0.00315962	8.54e-50	1238626	0.000217832254154955	269.871044588401
HDL	rs11154887	6	137099184	T	A	0.418	-0.0121952	0.00142309	1.04e-17	1225345	7.23614259199181e-05	88.6739832968635
HDL	rs1188870	6	139230423	T	A	0.49	-0.00892757	0.00138275	1.07e-10	1241910	3.9834812751229e-05	49.4731433876564
HDL	rs17585887	6	139835498	T	C	0.418	-0.0210868	0.00139129	6.88e-52	1244517	0.00021634687177074	269.30519045727
HDL	rs609834	6	153457812	C	G	0.479	-0.012721	0.001384	3.87e-20	1244425	8.0769191872238e-05	100.519158908459
HDL	rs112201728	6	160551486	T	C	0.0686	-0.0271389	0.00268017	4.24e-24	1244539	9.41184630351109e-05	117.144935131575
HDL	rs41272086	6	161008646	A	G	0.101	-0.0576994	0.00228606	1.47e-140	1244479	0.000604579831639855	752.840847532525
HDL	rs9347737	6	163740322	G	A	0.423	-0.0115335	0.00144193	1.26e-15	1229233	6.49334407283595e-05	79.8233814867726
HDL	rs1007766	7	1034903	G	A	0.487	0.0117497	0.0013918	3.12e-17	1226511	6.89810623028696e-05	84.6117303510732
HDL	rs34409228	7	1102674	T	C	0.126	0.0282762	0.00210412	3.6e-41	1232019	0.000176097853801437	216.993761682606
HDL	rs79949326	7	6461310	T	C	0.252	0.0282304	0.00159987	1.1e-69	1238995	0.000300445841884447	372.36216963948
HDL	rs6460894	7	12247330	C	T	0.328	-0.0108081	0.00148633	3.55e-13	1239011	5.14958013697075e-05	63.8070471543062
HDL	rs2389763	7	17307847	T	C	0.408	0.00992181	0.0014099	1.96e-12	1236385	4.7554725352141e-05	58.798650148715
HDL	rs10242866	7	17920613	T	C	0.393	-0.02315	0.00141783	6.26e-60	1239028	0.000255689696595	316.88720680708
HDL	rs1534696	7	26397239	C	A	0.448	-0.0158296	0.00141952	7.05e-29	1220863	0.000123933001794847	151.323722507431
HDL	rs2700908	7	36198547	C	T	0.386	-0.0126261	0.001418	5.38e-19	1238214	7.55655975207497e-05	93.5733005597313
HDL	rs2534600	7	38280224	A	C	0.417	-0.0115486	0.00143301	7.69e-16	1228416	6.48475068885151e-05	79.6647513874628
HDL	rs9648555	7	46656869	G	A	0.451	0.0085995	0.00139934	7.98e-10	1238198	3.66205855009995e-05	45.3451230499513
HDL	rs876037	7	50308692	A	T	0.313	0.0153142	0.00148007	4.32e-25	1235446	0.000100860170837942	124.619662061115
HDL	rs42125	7	72823777	G	A	0.0204	-0.045477	0.00553833	2.19e-16	1194493	8.26594583086627e-05	98.7441411517916
HDL	rs55747707	7	73037366	A	G	0.196	0.0381472	0.00174595	7.95e-106	1238411	0.000458635268459397	568.238658467209
HDL	rs2107745	7	73931457	G	A	0.198	-0.0104681	0.00175021	2.22e-09	1237318	3.48020863039951e-05	43.0626768883116
HDL	rs117649635	7	74297908	G	C	0.054	-0.023684	0.00326045	3.76e-13	1216435	5.7309285863808e-05	69.7169019570333
HDL	rs705379	7	94953895	A	G	0.464	-0.0102792	0.00140992	3.09e-13	1238888	5.25571005387571e-05	65.1156783493123
HDL	rs201440	7	101735599	C	T	0.422	0.00848358	0.00142216	2.44e-09	1229234	3.51098201030276e-05	43.1596297117198
HDL	rs4730222	7	106810293	C	G	0.2	0.0142388	0.00173811	2.57e-16	1238942	6.48778961408e-05	80.3850358566903
HDL	rs10229792	7	116982907	A	G	0.362	-0.0118447	0.00145649	4.21e-16	1229138	6.48048300287881e-05	79.6591118574686
HDL	rs111731678	7	130418744	A	T	0.193	-0.01308	0.00186053	2.06e-12	1082427	5.32937557728e-05	57.6895680861253
HDL	rs11762784	7	130424646	A	G	0.495	0.0299962	0.00140741	8.59e-101	1226612	0.000449841018619278	552.02781660392
HDL	rs357409	7	138039643	C	T	0.368	0.0102738	0.00150845	9.7e-12	1195825	4.90972431414989e-05	58.7144953050485
HDL	rs10273527	7	139036598	T	G	0.234	0.0118801	0.00164368	4.91e-13	1236305	5.05958405582729e-05	62.5549544902179
HDL	rs62490267	7	149238823	C	T	0.304	-0.00847363	0.00153763	3.57e-08	1229115	3.0384480278532e-05	37.347094480643
HDL	rs12154436	7	150343784	A	G	0.191	-0.0139363	0.00175701	2.16e-15	1239028	6.00215018036022e-05	74.3726652527717
HDL	rs7794796	7	150540196	T	C	0.332	-0.0174129	0.00147194	2.73e-32	1238991	0.000134488996695328	166.652800494483
HDL	rs2977730	8	4842277	G	C	0.0645	-0.0162985	0.00282793	8.24e-09	1244536	3.20574353989789e-05	39.8978473294961
HDL	rs2928576	8	6600349	T	C	0.329	-0.0104078	0.00146933	1.41e-12	1244531	4.78262456222751e-05	59.5239964473189
HDL	rs746390	8	9103712	G	T	0.285	0.011609	0.00154991	6.88e-14	1231454	5.492505745155e-05	67.6412870504035
HDL	rs9987289	8	9183358	A	G	0.0917	-0.0933621	0.0023742	0	1244542	0.00145201087490899	1809.71333770605
HDL	rs6601302	8	9239458	T	G	0.249	0.0171219	0.00162531	5.99e-26	1236421	0.000109641051575221	135.577144168239
HDL	rs116998829	8	19520669	G	A	0.0376	0.0229285	0.00374312	9.04e-10	1237297	3.80473788194909e-05	47.0776227566089
HDL	rs73607783	8	19742204	A	T	0.197	0.0670357	0.00173892	0	1244527	0.0014217527094373	1771.92603134844
HDL	rs75591007	8	19761631	G	T	0.0155	-0.190253	0.00561017	4.41e-252	1239911	0.00110469004825268	1371.22991708219
HDL	rs148048657	8	19774005	A	G	0.0236	-0.0302148	0.00487614	5.77e-10	1226435	4.20735557665286e-05	51.602568322947
HDL	rs74444445	8	19852491	C	T	0.0219	-0.0784605	0.00485541	9.75e-59	1235483	0.000263729986300157	325.919341907681
HDL	rs147034752	8	19916775	C	T	0.0323	0.0699986	0.00395336	3.76e-70	1239903	0.000306303505492206	379.902388196541
HDL	rs17166	8	19969011	T	C	0.0256	0.0352942	0.00448773	3.7e-15	1238813	6.2146105931101e-05	76.9920643916027
HDL	rs546011672	8	19980352	G	C	0.0196	-0.0497246	0.00573943	4.57e-18	1053346	9.50237063897187e-05	100.102163061924
HDL	rs182619883	8	20025108	A	G	0.00621	0.0923302	0.00989105	1.01e-20	1224231	0.00010522132607707	128.828554313327
HDL	rs75772194	8	36846435	G	A	0.166	-0.0131949	0.00184198	7.87e-13	1243548	4.82076921215369e-05	59.9513728242921
HDL	rs10958704	8	38328302	G	A	0.402	-0.00942245	0.00140152	1.78e-11	1238793	4.268594651189e-05	52.8812236504949
HDL	rs1949102	8	60654261	G	A	0.264	0.0106589	0.00156552	9.86e-12	1244543	4.41505900801997e-05	54.9496455882792
HDL	rs1149453	8	64532168	T	G	0.188	-0.0121915	0.00177057	5.75e-12	1232105	4.5379338429992e-05	55.9145563831857
HDL	rs34246353	8	71138299	C	T	0.0931	-0.0249181	0.00235384	3.46e-26	1244535	0.000104850118904987	130.503116298442
HDL	rs10099536	8	72477332	T	C	0.0274	-0.026065	0.00439973	3.14e-09	1233969	3.6210146528478e-05	44.68374388622
HDL	rs2120710	8	93210803	G	A	0.338	0.00935095	0.00147696	2.43e-10	1233040	3.91305682745596e-05	48.2513657474881
HDL	rs1802539	8	103876183	A	G	0.186	0.0130999	0.00176564	1.18e-13	1244539	5.19640875260681e-05	64.674590353504
HDL	rs2941657	8	106372180	A	G	0.469	0.0105831	0.00139657	3.51e-14	1239003	5.57857349502176e-05	69.1224374350284
HDL	rs3808460	8	116597635	T	C	0.426	-0.0325051	0.00139391	2.82e-120	1244543	0.000516719082132139	643.410545702423
HDL	rs72647336	8	126445055	A	G	0.0489	-0.0501736	0.00341746	8.46e-49	1228391	0.000234161538455888	287.708828404176
HDL	rs2954038	8	126507389	C	A	0.303	-0.0425786	0.00150519	4.87e-176	1240972	0.000765752031101101	951.00353092092
HDL	rs12549603	8	126632639	A	G	0.28	-0.019313	0.00153164	1.88e-36	1238215	0.0001503903619008	186.243310379125
HDL	rs7817574	8	144302570	C	T	0.195	0.0275212	0.00175991	4.02e-55	1232721	0.000237790894301688	293.199073502579
HDL	rs4875043	8	144496772	C	A	0.21	-0.00956366	0.00173912	3.82e-08	1231907	3.03476200232201e-05	37.3865194365908
HDL	rs4741016	9	1036132	C	T	0.23	-0.0144567	0.00164534	1.54e-18	1232018	7.4026445146038e-05	91.2085166852984
HDL	rs34881325	9	2622134	T	C	0.385	0.00848737	0.00151345	2.05e-08	1174848	3.4112387118728e-05	40.0781687188955
HDL	rs606472	9	13703275	T	A	0.336	-0.0100498	0.00147153	8.52e-12	1232089	4.50663297816883e-05	55.5281415112685
HDL	rs548824	9	14088789	C	T	0.164	0.0135983	0.00187108	3.66e-13	1244543	5.07048330945411e-05	63.1074435367049
HDL	rs686030	9	15304782	C	A	0.142	-0.0496185	0.00196943	4.62e-140	1244429	0.000599919377771142	747.004013704703
HDL	rs62543565	9	16901067	C	A	0.363	-0.0105497	0.00143746	2.15e-13	1232092	5.14702494121616e-05	63.4192438025262
HDL	rs1412234	9	28410683	C	T	0.32	-0.0125588	0.00148344	2.54e-17	1243582	6.8641248677888e-05	85.3667437107318
HDL	rs62544382	9	33109996	G	T	0.432	-0.00863868	0.00142367	1.3e-09	1226363	3.66232474974671e-05	44.9149673562071
HDL	rs2005617	9	33791164	T	C	0.382	0.00894117	0.00142734	3.75e-10	1241031	3.77459654645081e-05	46.8456060070795
HDL	rs117665650	9	82188040	C	G	0.0995	0.0143865	0.0023232	5.92e-10	1243675	3.70891682135089e-05	46.1285079675907
HDL	rs1831757	9	86509330	C	T	0.259	0.00942722	0.00161559	5.37e-09	1214170	3.41126337992432e-05	41.4198812960022
HDL	rs76226649	9	93964150	A	G	0.0965	-0.0148223	0.00231678	1.58e-10	1243710	3.83103980152324e-05	47.6487739382232
HDL	rs74500135	9	106603816	C	T	0.00909	0.0625014	0.00784618	1.64e-15	1233040	7.03732455842239e-05	86.7789929080597
HDL	rs13300004	9	107422611	G	A	0.0128	-0.0396576	0.00649378	1.02e-09	1236395	3.97464154807468e-05	49.1441431790202
HDL	rs2297402	9	107579880	T	C	0.0249	-0.0652481	0.00455146	1.31e-46	1236591	0.000206735109577011	255.699224423906
HDL	rs2066714	9	107586753	C	T	0.123	0.0451623	0.00208279	2.93e-104	1238271	0.000440034576316587	545.121046889874
HDL	rs11789603	9	107647019	T	C	0.101	0.063725	0.00230617	4.54e-168	1243899	0.00073744689174875	917.984941447338
HDL	rs115464783	9	107654293	T	C	0.0143	-0.0603886	0.00841833	7.31e-13	990498	0.000102806532769443	101.83992929203
HDL	rs2740488	9	107661742	C	A	0.261	-0.0689666	0.00157162	0	1243899	0.00183481623256259	2286.51774711436
HDL	rs10739573	9	123489818	A	G	0.242	0.00935733	0.00162725	8.9e-09	1231239	3.2123174643541e-05	39.5525117308314
HDL	rs2479106	9	126525212	G	A	0.292	-0.0106696	0.00151141	1.67e-12	1243663	4.70698030499635e-05	58.5416338740973
HDL	rs6478851	9	131561110	A	G	0.237	-0.0114603	0.00162699	1.87e-12	1241039	4.75001359396616e-05	58.9522264449199
HDL	rs3739514	9	133783025	A	G	0.346	-0.00823057	0.00146087	1.76e-08	1238210	3.06579893177289e-05	37.9621314797479
HDL	rs2519093	9	136141870	T	C	0.187	0.0169995	0.00174306	1.8e-22	1243694	8.78687490220155e-05	109.291263495291
HDL	rs4881540	10	954276	C	T	0.122	-0.0124591	0.00222562	2.17e-08	1223460	3.32550561494319e-05	40.6875175521525
HDL	rs75406471	10	5257647	A	G	0.156	-0.0141584	0.00191123	1.28e-13	1243704	5.27868073925837e-05	65.6545236204639
HDL	rs2152961	10	8447798	C	A	0.456	0.00813113	0.00147897	3.84e-08	1191245	3.28016391933523e-05	39.0760048346182
HDL	rs1970487	10	16097174	T	C	0.239	0.0100335	0.00182389	3.77e-08	1062245	3.66199260874155e-05	38.9006846870725
HDL	rs11254464	10	17265447	C	T	0.421	0.0140662	0.00142002	3.93e-23	1204518	9.64593278831839e-05	116.198012166696
HDL	rs12358424	10	33641149	G	T	0.0899	-0.0256025	0.00244639	1.25e-25	1243706	0.000107261422280965	133.415770301802
HDL	rs12765967	10	33958617	C	T	0.216	-0.0112703	0.001668	1.41e-11	1243712	4.30200353139379e-05	53.5067499825715
HDL	rs55665473	10	46022005	A	G	0.239	0.0262865	0.00161043	6.81e-60	1244480	0.000251349532759095	312.877605468919
HDL	rs10826337	10	61409469	A	G	0.417	-0.0117207	0.00141311	1.09e-16	1229321	6.67946541336248e-05	82.117422429723
HDL	rs10733794	10	65355538	A	G	0.332	-0.009393	0.00147927	2.16e-10	1234679	3.9133905010848e-05	48.31962337263
HDL	rs703966	10	80954251	A	G	0.418	0.01183	0.00140175	3.19e-17	1238791	6.80924171928e-05	84.3578815339145
HDL	rs10458643	10	81152268	A	G	0.476	-0.00848246	0.00140931	1.76e-09	1226366	3.58931749747454e-05	44.0196776407205
HDL	rs4418728	10	94839724	T	G	0.451	0.0194771	0.00138768	9.42e-45	1232800	0.000187857037852983	231.633294495654
HDL	rs10786114	10	95309022	C	T	0.124	-0.0229704	0.00209605	6.02e-28	1233892	0.000114628577467208	141.455270267419
HDL	rs1324693	10	101890617	G	A	0.383	0.0099902	0.00142305	2.21e-12	1243708	4.71696114786169e-05	58.6678961554926
HDL	rs2792751	10	113940329	T	C	0.281	0.0306446	0.00151917	1.73e-90	1243712	0.000379466218838355	472.125086552863
HDL	rs17875416	10	115796337	G	A	0.119	0.0302703	0.0021178	2.41e-46	1243123	0.000192126077316907	238.881856794359
HDL	rs2218584	10	118408642	C	T	0.422	0.011805	0.00140199	3.76e-17	1241011	6.79833040518e-05	84.3736281760385
HDL	rs2254069	10	122875589	A	G	0.117	-0.0167006	0.00211643	3e-15	1243600	5.76289503592639e-05	71.6713777551507
HDL	rs10749408	10	122967526	C	T	0.316	-0.0104895	0.00148842	1.82e-12	1231257	4.7564480155752e-05	58.5667897130775
HDL	rs10901852	10	126728522	C	G	0.266	-0.0109725	0.00156609	2.45e-12	1243668	4.701309806655e-05	58.4713405389008
HDL	rs140201358	11	823586	G	C	0.0131	-0.0586188	0.00613164	1.18e-21	1224836	8.88481291824011e-05	108.833879145551
HDL	rs1661052	11	2942593	G	A	0.0917	-0.0260638	0.00245756	2.81e-26	1226366	0.000113162911956004	138.794627762254
HDL	rs72844048	11	3105622	A	G	0.0165	-0.0427918	0.00587717	3.31e-13	1232357	5.94305041377478e-05	73.2438318445257
HDL	rs72867447	11	13301875	C	G	0.436	0.00904037	0.00139163	8.23e-11	1236609	4.01946267189253e-05	49.7069547155002
HDL	rs3900595	11	14313329	G	T	0.123	0.0205401	0.00211429	2.61e-22	1243706	9.10206238374934e-05	113.213018668772
HDL	rs79634051	11	14561945	C	G	0.0256	0.0485277	0.00460806	6.21e-26	1230900	0.000117486144665978	144.630452571336
HDL	rs7944119	11	27722298	T	G	0.315	-0.0152899	0.00148375	6.7e-25	1244534	0.000100888208679416	125.571272784983
HDL	rs2035837	11	29200527	C	T	0.149	0.0124786	0.00192793	9.64e-11	1244538	3.94891287077401e-05	49.1475830806499
HDL	rs11031791	11	32469729	T	A	0.394	-0.0115235	0.00140988	3e-16	1244532	6.3411445598838e-05	78.9224509778286
HDL	rs11603150	11	36373869	C	T	0.327	0.00872007	0.00147484	3.37e-09	1234110	3.34682307803103e-05	41.3047937501967
HDL	rs11038703	11	45912410	G	A	0.274	0.0110357	0.0015734	2.32e-12	1241887	4.84525848724975e-05	60.1754540206748
HDL	rs10838684	11	47283862	G	A	0.311	0.0419489	0.00150491	5.41e-171	1244512	0.000754137888695735	939.240460678723
HDL	rs7107356	11	47676170	G	A	0.496	0.0120413	0.00139808	7.13e-18	1241901	7.24918130720179e-05	90.0340368928985
HDL	rs515939	11	57432629	A	G	0.267	-0.00961087	0.00155624	6.59e-10	1244449	3.61551891062981e-05	44.9948434148378
HDL	rs34158262	11	58437534	T	C	0.085	0.0161342	0.00252303	1.61e-10	1244393	4.0491595319502e-05	50.3894171391176
HDL	rs174564	11	61588305	G	A	0.351	-0.0458541	0.00144647	1.52e-220	1239412	0.000957939665393662	1188.41843384242
HDL	rs11231694	11	63862882	C	G	0.0566	-0.0401783	0.00299854	6.1e-41	1242727	0.000172395296681021	214.276885395151
HDL	rs2306363	11	65405600	T	G	0.201	0.0201555	0.00174614	8.02e-31	1214115	0.000130484818207939	158.443988623948
HDL	rs7940105	11	68732026	A	G	0.266	-0.012759	0.00159553	1.28e-15	1238791	6.3568354125528e-05	78.7527840236719
HDL	rs673335	11	75450576	C	T	0.174	-0.0299251	0.0018127	3.18e-61	1243682	0.000257413021274154	320.221855573562
HDL	rs10899363	11	76928929	A	G	0.344	-0.00820034	0.00146823	2.33e-08	1241008	3.03498113771015e-05	37.6654411568858
HDL	rs12575636	11	95311260	G	T	0.192	-0.0120041	0.00173733	4.86e-12	1244544	4.47097039804723e-05	55.645592309225
HDL	rs7127524	11	102353192	A	G	0.459	0.00771629	0.00139158	2.94e-08	1233880	2.95703883984039e-05	36.4873306407845
HDL	rs12146566	11	103871404	C	A	0.203	-0.0122606	0.00175036	2.48e-12	1243710	4.86415944780735e-05	60.4988829472666
HDL	rs10891054	11	109966513	A	C	0.305	0.0164975	0.00150561	6.13e-28	1233912	0.000115385414274687	142.391646446794
HDL	rs964184	11	116648917	G	C	0.135	-0.108211	0.00200104	0	1241077	0.00273478187267955	3403.37690610448
HDL	rs141469619	11	116714293	G	A	0.00916	-0.209314	0.0078753	1.2e-155	1227121	0.000795290059790384	976.692296554841
HDL	rs59781045	11	117095283	T	C	0.0694	0.0804584	0.00273867	1.03e-189	1243691	0.0008361713789772	1040.80743954075
HDL	rs555075	11	117193203	T	C	0.443	0.0135446	0.00139256	2.33e-22	1241081	9.05359962628383e-05	112.372497461897
HDL	rs538478	11	118925341	A	G	0.451	0.0114385	0.00139647	2.59e-16	1243650	6.47913508916355e-05	80.5828550257165
HDL	rs11218736	11	122523667	T	C	0.249	0.0223314	0.00160376	4.5e-44	1243624	0.000186509595926188	231.990705197603
HDL	rs2155308	11	126328095	G	A	0.391	-0.0120928	0.00141812	1.5e-17	1235579	6.96430505590579e-05	86.0553446373266
HDL	rs2364482	12	6502131	G	T	0.19	0.0114597	0.00176721	8.9e-11	1230932	4.0421750074902e-05	49.7583561395351
HDL	rs7298463	12	6663964	C	G	0.171	-0.018262	0.00186452	1.19e-22	1239758	9.4553435585592e-05	117.234273991225
HDL	rs11045172	12	20470221	C	A	0.199	0.0265875	0.00173495	5.23e-53	1239846	0.000225356762022187	279.470209754189
HDL	rs11045237	12	20579083	C	A	0.219	0.0126706	0.00167758	4.26e-14	1240482	5.49186061312601e-05	68.1291740929836
HDL	rs11052705	12	33588388	T	C	0.409	0.00890816	0.00143624	5.56e-10	1237884	3.83633745726333e-05	47.4911527636028
HDL	rs2720301	12	50180450	C	T	0.325	-0.00887831	0.0015174	4.89e-09	1226351	3.45842004351139e-05	42.4137664656021
HDL	rs11170538	12	53796744	C	T	0.476	-0.0156092	0.00158256	6.01e-23	1033167	0.000121542880832415	125.589114938053
HDL	rs11171739	12	56470625	C	T	0.422	0.0111703	0.00139418	1.13e-15	1237885	6.08695315187689e-05	75.3539450443811
HDL	rs703846	12	57462647	A	C	0.0512	-0.0180101	0.00317208	1.37e-08	1224963	3.15142431198298e-05	38.6049353716288
HDL	rs73119306	12	57826982	G	A	0.249	0.0274664	0.00160299	8.21e-66	1240485	0.000282145261424782	350.095178023525
HDL	rs35641	12	69993288	T	C	0.347	-0.00996232	0.00146102	9.18e-12	1240510	4.49773254646276e-05	55.7972416681728
HDL	rs77417359	12	71514121	A	G	0.394	-0.00892586	0.00159439	2.16e-08	1045304	3.80451221805077e-05	39.7701553659491
HDL	rs2126606	12	89674799	C	T	0.383	-0.0104526	0.00147914	1.59e-12	1222410	5.16371894294047e-05	63.124973052211
HDL	rs1316739	12	93968256	A	G	0.235	-0.00932367	0.00162722	1.01e-08	1240500	3.1255977146783e-05	38.7741890637973
HDL	rs10778120	12	101875141	A	T	0.334	-0.0102051	0.00148216	5.77e-12	1218390	4.63324452390569e-05	56.4535109191272
HDL	rs2338104	12	109895168	C	G	0.472	-0.0283678	0.0013828	1.59e-93	1239671	0.000401104218523515	497.435989146519
HDL	rs11065979	12	112059557	T	C	0.43	-0.0183163	0.00142004	4.59e-38	1219153	0.000164455651757238	200.52925046407
HDL	rs2243616	12	121406370	G	T	0.348	0.0124677	0.00147148	2.39e-17	1210169	7.05390363966557e-05	85.3700359791067
HDL	rs111933537	12	123248255	C	A	0.0865	0.026116	0.0025913	6.89e-24	1201468	0.000107787394661688	129.516850198447
HDL	rs12366872	12	123804721	C	G	0.0953	0.043415	0.00234974	3.19e-76	1239673	0.0003250177633549	403.046092855561
HDL	rs77909495	12	124323592	T	C	0.0847	0.0243771	0.00255636	1.49e-21	1228979	9.21384593560385e-05	113.246481720359
HDL	rs837500	12	125077567	C	T	0.367	-0.0274427	0.00149384	2.26e-75	1181796	0.000349907656755766	413.663513338662
HDL	rs838876	12	125259888	A	G	0.328	0.0384287	0.00151337	3.03e-142	1215016	0.00065100526129003	791.495774454503
HDL	rs61941677	12	125325010	G	C	0.13	-0.0616162	0.00210707	5.58e-188	1234170	0.000858780990371928	1060.79100447474
HDL	rs9507895	13	28018237	C	G	0.271	0.00952412	0.00157093	1.34e-09	1239624	3.58407040465774e-05	44.4305176526602
HDL	rs76428106	13	28604007	C	T	0.0117	-0.0610701	0.00693011	1.23e-18	1230464	8.62505583211604e-05	106.137188884772
HDL	rs78424108	13	41673457	G	C	0.071	-0.0255808	0.00269463	2.24e-21	1244510	8.63241484395315e-05	107.440368024462
HDL	rs549058	13	51201045	T	G	0.125	0.0182085	0.00208492	2.47e-18	1244538	7.25264470546875e-05	90.2683211522673
HDL	rs9537803	13	58366634	C	T	0.279	-0.0111516	0.00154214	4.79e-13	1244525	5.00315352911741e-05	62.2685117844227
HDL	rs12585801	13	81393264	A	G	0.149	0.0124621	0.00195403	1.8e-10	1244543	3.93847676657032e-05	49.0178886935996
HDL	rs7320982	13	92019926	C	T	0.237	-0.00953965	0.0016548	8.17e-09	1241913	3.29130221446676e-05	40.8763896102227
HDL	rs4644730	13	94099216	G	T	0.247	-0.00888711	0.0015933	2.44e-08	1244539	2.93794077315465e-05	36.5648342131686
HDL	rs3858776	13	99161457	T	C	0.335	-0.00914065	0.00146855	4.84e-10	1244535	3.72263629933449e-05	46.3311619558494
HDL	rs150861794	13	109003805	T	C	0.0186	-0.0348214	0.0052543	3.42e-11	1233994	4.42671385171155e-05	54.6277130055509
HDL	rs9604045	13	113927208	T	G	0.239	0.0168561	0.00183578	4.23e-20	1151814	0.000103353872022495	119.056534995856
HDL	rs12896809	14	24792966	A	G	0.425	-0.00873961	0.00144621	1.51e-09	1210595	3.73311076678389e-05	45.1944647843629
HDL	rs1955512	14	33175822	G	A	0.429	-0.0102855	0.00143493	7.61e-13	1220538	5.18291651186595e-05	63.2626407271203
HDL	rs140664623	14	52321987	T	G	0.0246	0.0276178	0.00464329	2.72e-09	1239057	3.6603786581831e-05	45.3557649758921
HDL	rs146182298	14	52531408	T	C	0.0385	-0.0222312	0.00359318	6.13e-10	1239074	3.65902877865571e-05	45.3396600594746
HDL	rs8011224	14	65969670	T	A	0.338	-0.0105462	0.00148813	1.37e-12	1223381	4.97733293299133e-05	60.8946767931024
HDL	rs2236263	14	69261162	A	T	0.309	0.0119324	0.0014901	1.17e-15	1243688	6.08025970099709e-05	75.623936796696
HDL	rs11158858	14	70844475	G	T	0.369	-0.0105913	0.00144017	1.92e-13	1239395	5.22377256768478e-05	64.7464537472948
HDL	rs13379043	14	74250126	C	T	0.271	0.0187991	0.00155787	1.57e-33	1235037	0.000139637135446926	172.480834306316
HDL	rs8007841	14	81647878	T	C	0.348	0.0100296	0.00148498	1.44e-11	1204429	4.56482424583987e-05	54.9824855732742
HDL	rs3825667	14	89804373	T	A	0.195	-0.0152946	0.00174577	1.94e-18	1243568	7.3440687556782e-05	91.3350497710904
HDL	rs28535178	14	100379166	C	G	0.176	-0.0138453	0.0018185	2.67e-14	1243684	5.55999775380403e-05	69.1525361439214
HDL	rs4900459	14	100777633	T	C	0.164	0.010528	0.00189874	2.94e-08	1238209	3.0392881283072e-05	37.6338221551577
HDL	rs10144381	14	101173297	T	C	0.328	0.0103735	0.0014946	3.9e-12	1214184	4.7437712095872e-05	57.6007485957184
HDL	rs12888955	14	103256877	G	A	0.346	-0.0130983	0.00144429	1.2e-19	1241054	7.76450384092015e-05	96.3690127835154
HDL	rs2494747	14	105258437	G	T	0.385	0.0260436	0.00148633	9.72e-69	1188984	0.000321194332759608	382.01698184277
HDL	rs11624762	14	105312935	T	C	0.135	-0.0114749	0.00203348	1.67e-08	1235579	3.07523062238355e-05	37.9980107935918
HDL	rs7497973	15	23948571	G	A	0.486	-0.0098145	0.00139549	2.02e-12	1233354	4.8124445956182e-05	59.357238203151
HDL	rs275182	15	39446211	G	A	0.167	0.0146602	0.00186648	4.01e-15	1243710	5.97958795681369e-05	74.3730609885264
HDL	rs7170463	15	41888918	G	A	0.312	0.013358	0.00151354	1.09e-18	1241734	7.6604786439168e-05	95.1299020805138
HDL	rs8028785	15	43130646	C	T	0.182	0.012496	0.00180803	4.8e-12	1244513	4.6493979564032e-05	57.8649593734516
HDL	rs55707100	15	43820717	T	C	0.0264	-0.101589	0.00430332	3.26e-123	1239884	0.00053052744851492	658.140595570508
HDL	rs1318175	15	58586129	T	C	0.163	-0.0629051	0.00187174	1.29e-247	1243928	0.0010797290153191	1344.55474988596
HDL	rs4775033	15	58644087	T	A	0.121	-0.0394506	0.00212592	7.17e-77	1243934	0.000331063625341698	411.9570215836
HDL	rs1601933	15	58671559	T	C	0.464	-0.0733168	0.00145061	0	1195552	0.00267374366572347	3205.16402656934
HDL	rs11632618	15	58724706	A	G	0.0658	0.0996229	0.00277216	8.1e-283	1237066	0.00122015249361015	1511.25068064181
HDL	rs7180487	15	58939190	T	G	0.00403	0.0759978	0.0122625	5.73e-10	1023560	4.63642607599671e-05	47.4587104029749
HDL	rs80236739	15	58972699	G	A	0.0412	-0.0376286	0.00369835	2.58e-24	1236528	0.000111864260965914	138.338542293935
HDL	rs10152714	15	64117968	T	A	0.45	-0.0111846	0.00156397	8.59e-13	1042819	6.19221621942e-05	64.5774821901953
HDL	rs10735127	15	70791915	G	A	0.224	0.00937456	0.00165969	1.62e-08	1244497	3.05521319713047e-05	38.0231371655334
HDL	rs1904335	15	73451443	C	A	0.444	0.00903183	0.00140403	1.25e-10	1232106	4.02753447403001e-05	49.6254120364804
HDL	rs4702	15	91426560	G	A	0.449	-0.0080258	0.00140855	1.21e-08	1217709	3.18716539717407e-05	38.8115731319954
HDL	rs56332871	15	96714816	A	C	0.27	0.0111343	0.00155996	9.5e-13	1238071	4.8870013304358e-05	60.507405499425
HDL	rs1037117	15	102068658	A	G	0.253	0.0107171	0.001612	2.96e-11	1214605	4.34135884387966e-05	52.7325640683615
HDL	rs7404696	16	1012393	C	T	0.274	0.0144949	0.00157513	3.5e-20	1191572	8.35887106288265e-05	99.6101262060059
HDL	rs72762705	16	4020732	T	C	0.199	0.0113809	0.00174833	7.54e-11	1238207	4.12922742276584e-05	51.1304117010391
HDL	rs2113260	16	11455993	T	C	0.316	0.011127	0.00151874	2.36e-13	1226365	5.3521633045152e-05	65.6404636509602
HDL	rs12928099	16	15150505	A	C	0.297	0.0181148	0.00151748	7.55e-33	1237799	0.000137027854219481	169.635911714292
HDL	rs62037364	16	28868695	A	G	0.406	-0.00983002	0.00141968	4.39e-12	1230672	4.66070137307625e-05	57.3605269909066
HDL	rs3814883	16	29994922	T	C	0.469	-0.0127004	0.00141221	2.4e-19	1228978	8.03400611721725e-05	98.7439401133209
HDL	rs11647243	16	30965308	A	G	0.109	-0.0127913	0.00220666	6.76e-09	1243127	3.17807079345142e-05	39.5086481639012
HDL	rs191732571	16	56431480	G	A	0.0116	0.0776844	0.00732038	2.62e-26	1071344	0.000138384788139128	148.277955107953
HDL	rs71387120	16	56596812	T	C	0.036	0.0425459	0.00366899	4.31e-31	1235498	0.000125639141541468	155.246161812416
HDL	rs78897229	16	56679114	G	A	0.0214	0.0653718	0.00481424	5.35e-42	1239038	0.000178990452978571	221.815317720953
HDL	rs74518630	16	56796333	G	A	0.0202	-0.0838859	0.00512307	2.93e-60	1233697	0.000278545878609838	343.736404070245
HDL	rs80082308	16	56796904	G	A	0.0294	0.106523	0.00430243	2.49e-135	1236320	0.000647596347971427	801.153846036195
HDL	rs1138429	16	56942921	T	A	0.108	-0.0910923	0.00229313	0	1243052	0.00159875509328784	1990.51486448932
HDL	rs4783961	16	56994894	G	A	0.497	-0.092235	0.00140174	0	1204705	0.00425349448118595	5146.08641212182
HDL	rs5883	16	57007353	T	C	0.0543	0.130463	0.00303513	0	1242313	0.00174806644389129	2175.44499437223
HDL	rs71647892	16	66997756	C	T	0.00986	-0.0745513	0.00718962	3.42e-25	1212039	0.00010852104274451	131.545794571723
HDL	rs55781197	16	67940350	G	A	0.122	0.0702085	0.00209824	1.8e-245	1244542	0.00105599954522706	1315.62297127625
HDL	rs6499240	16	69686912	A	G	0.418	0.00907201	0.00142403	1.88e-10	1230413	4.00438939576115e-05	49.272420667867
HDL	rs36182990	16	71992584	A	G	0.269	0.0103092	0.00155746	3.61e-11	1244533	4.17974303536099e-05	52.0203721132889
HDL	rs2925979	16	81534790	T	C	0.301	-0.0347222	0.00149747	6.12e-119	1238208	0.000507327186268726	628.494418305879
HDL	rs896263	16	85927519	G	C	0.241	0.0126468	0.00166655	3.23e-14	1224729	5.85126968567011e-05	71.666273070128
HDL	rs12931143	16	88006065	C	T	0.478	-0.0120075	0.00143819	6.88e-17	1206238	7.195046183055e-05	86.7954822516681
HDL	rs3859027	16	88551465	C	T	0.393	-0.00946731	0.00143412	4.07e-11	1221846	4.27626325252006e-05	52.2515003868311
HDL	rs11870735	17	481604	T	C	0.176	-0.0156151	0.00181389	7.39e-18	1243649	7.07227948276045e-05	87.9604124251667
HDL	rs7213347	17	2153257	G	C	0.301	0.00931258	0.00151499	7.9e-10	1233893	3.64933472964006e-05	45.0304561009765
HDL	rs12453576	17	3881293	T	C	0.174	-0.0132616	0.00182331	3.51e-13	1238793	5.05534896942029e-05	62.6283741346377
HDL	rs2047803	17	7237346	C	T	0.358	-0.00809164	0.00147837	4.42e-08	1222662	3.00968577479882e-05	36.7993316384048
HDL	rs3803800	17	7462969	A	G	0.217	-0.0189566	0.00166775	6.14e-30	1243489	0.000122115947632726	151.868138895672
HDL	rs28583584	17	17483297	A	G	0.0612	-0.0254357	0.00289972	1.76e-18	1240123	7.43433088933915e-05	92.2015531367269
HDL	rs3032059	17	18665275	A	T	0.197	0.0103778	0.00180267	8.57e-09	1210885	3.40739404933849e-05	41.2609612099883
HDL	rs4795386	17	37746847	A	G	0.281	-0.0287948	0.0015725	6.7e-75	1211449	0.000335037437803709	406.016129518731
HDL	rs12103674	17	37804352	C	T	0.077	-0.0224947	0.00260165	5.32e-18	1242984	7.19254906257688e-05	89.4085209407341
HDL	rs34855406	17	40731411	C	G	0.273	-0.0137686	0.00155619	8.94e-19	1241863	7.52500200340543e-05	93.4570977779909
HDL	rs145947882	17	41809207	C	A	0.0251	-0.183864	0.00457671	0	1233925	0.00165446351995483	2044.8637423983
HDL	rs74456742	17	42191796	A	G	0.0386	0.0271466	0.00402389	1.52e-11	1058154	5.46955892666145e-05	57.8794129222429
HDL	rs12940636	17	53400110	C	T	0.345	0.0115518	0.00145409	1.95e-15	1243960	6.0310053420318e-05	75.0276983571278
HDL	rs9915591	17	65826090	G	C	0.202	-0.0141955	0.00171829	1.44e-16	1243683	6.4965927710838e-05	80.8021393272851
HDL	rs1007041	17	66384554	T	A	0.465	-0.010785	0.0014396	6.8e-14	1217193	5.787313774875e-05	70.446739383391
HDL	rs34931250	17	66879927	T	C	0.0595	-0.0502261	0.0029695	3.55e-64	1231605	0.000282334971355263	347.822800266405
HDL	rs2243486	17	74084029	T	C	0.441	0.00772588	0.00141439	4.7e-08	1212586	2.94290545252066e-05	35.6862508650157
HDL	rs2376583	17	76402105	A	T	0.496	-0.0294916	0.00137437	3.82e-102	1243689	0.000434849403136942	541.051825702647
HDL	rs7220532	17	76808773	T	C	0.478	-0.00952753	0.00152485	4.15e-10	1047283	4.52990448850419e-05	47.4429781478482
HDL	rs6506032	18	287534	A	G	0.0734	0.0217664	0.00261925	9.56e-17	1243709	6.44453465296437e-05	80.1562942965061
HDL	rs11664106	18	2846812	T	A	0.364	0.00960403	0.00159106	1.58e-09	1143142	4.27066505066746e-05	48.8217654742752
HDL	rs635703	18	2979489	T	A	0.269	0.00967233	0.00156168	5.88e-10	1233908	3.67927172811585e-05	45.4004250145272
HDL	rs10163728	18	19048220	T	C	0.15	-0.0113529	0.00194854	5.66e-09	1243672	3.286652629455e-05	40.8764562238663
HDL	rs1652343	18	21131929	C	T	0.493	0.0130372	0.00137986	3.45e-21	1241903	8.49676349987837e-05	105.530357537525
HDL	rs9956721	18	22621869	T	A	0.424	0.00815243	0.00140462	6.47e-09	1244483	3.24632871010686e-05	40.4012555523832
HDL	rs620982	18	29803271	C	T	0.46	0.00860377	0.00138019	4.55e-10	1244526	3.67755495601687e-05	45.7697372480599
HDL	rs147050466	18	46680955	T	C	0.0202	0.0429291	0.00498594	7.3e-18	1235391	7.29495080670369e-05	90.1275945851169
HDL	rs149615216	18	47106028	T	C	0.0107	0.261904	0.00669407	0	1237437	0.00145219870500204	1799.61490295577
HDL	rs6507939	18	47176261	A	C	0.149	-0.0758432	0.00197457	8.89318162514244e-323	1214158	0.00145874412972849	1773.73035631963
HDL	rs78277979	18	47276942	A	C	0.151	0.024393	0.00207925	8.77e-32	1088291	0.000152561540286702	166.056379934172
HDL	rs523288	18	57848369	T	A	0.238	-0.0184174	0.00164118	3.18e-29	1214223	0.000123032136282525	149.406585360476
HDL	rs73455693	18	58027496	A	G	0.0384	0.0212853	0.00365751	5.9e-09	1239040	3.34591748075631e-05	41.4585762049618
HDL	rs74625348	18	60846430	C	G	0.23	0.0114926	0.00166905	5.75e-12	1233450	4.6782684555992e-05	57.7067083749539
HDL	rs895332	19	4033301	G	A	0.0679	0.0218975	0.00282063	8.27e-15	1217124	6.06947808907099e-05	73.8774370821191
HDL	rs4804101	19	7220745	T	G	0.438	-0.0132598	0.00140172	3.09e-21	1232114	8.65594262080445e-05	106.66014018458
HDL	rs11259996	19	7524743	C	G	0.499	0.00804409	0.00140678	1.08e-08	1226613	3.23535625492821e-05	39.6865197124354
HDL	rs35137994	19	8429066	T	C	0.0579	0.0439765	0.00297353	1.72e-49	1238227	0.000210982719895573	261.299207960298
HDL	rs116843064	19	8429323	A	G	0.0198	0.214779	0.00494778	0	1231043	0.00179057912093075	2208.23032271978
HDL	rs737337	19	11347493	C	T	0.084	-0.0540584	0.00246206	7.49e-107	1243862	0.000449708535237857	559.626127286944
HDL	rs60570301	19	18597196	A	G	0.121	0.0159804	0.00216584	1.6e-13	1239623	5.43224729881469e-05	67.3429365228898
HDL	rs4805881	19	33896432	A	C	0.334	-0.019606	0.00146141	4.89e-41	1236164	0.000171012827753568	211.435717401427
HDL	rs1609909	19	35477041	G	A	0.482	0.00989028	0.0014027	1.78e-12	1235434	4.8845433409466e-05	60.3481592199159
HDL	rs2972566	19	45354238	G	C	0.168	0.0273683	0.00193661	2.41e-45	1188242	0.000209391113886689	248.859006029193
HDL	rs769449	19	45410002	A	G	0.124	-0.0848185	0.00210642	0	1239625	0.00156292076959793	1940.46532673313
HDL	rs204474	19	45487178	C	T	0.354	0.0388739	0.00144487	1.93e-159	1241877	0.000691165420530215	858.934722599715
HDL	rs9304665	19	47602577	T	A	0.24	0.0145103	0.00165348	1.7e-18	1227196	7.6808204461632e-05	94.2658080535467
HDL	rs28850399	19	52314227	C	T	0.114	-0.0232326	0.00218343	1.93e-26	1244543	0.000109034565987142	135.712785172834
HDL	rs103294	19	54797848	T	C	0.217	0.0551346	0.00167509	1.37e-237	1242419	0.00103299911114155	1284.74279483225
HDL	rs73602128	20	566768	C	T	0.0763	0.0170008	0.00265629	1.55e-10	1243796	4.07402972902762e-05	50.6746018262053
HDL	rs151235402	20	569164	T	C	0.0167	-0.0676011	0.00553802	2.86e-34	1235446	0.000150085947601897	185.450616980662
HDL	rs62194890	20	6706089	G	A	0.0672	0.0170158	0.00279631	1.16e-09	1243947	3.62988236384514e-05	45.1553792580814
HDL	rs1054787	20	17600114	C	G	0.156	-0.0181091	0.0018985	1.45e-21	1239624	8.63556533959517e-05	107.057612804101
HDL	rs1884595	20	21900477	A	C	0.43	0.00894957	0.00142451	3.33e-10	1214224	3.9262472521238e-05	47.6752297570809
HDL	rs6060086	20	30164874	C	G	0.161	0.014739	0.00188956	6.18e-15	1243711	5.8688616293118e-05	72.995844306395
HDL	rs12624640	20	32952125	A	G	0.429	-0.0179233	0.00141817	1.3e-36	1231216	0.000157383552552103	193.803334729201
HDL	rs6141564	20	34375497	G	A	0.135	-0.0122444	0.00204463	2.12e-09	1241058	3.5015061139128e-05	43.4571733726642
HDL	rs1800961	20	43042364	T	C	0.0338	-0.133595	0.00381998	5.85e-268	1236350	0.00116571970490776	1442.9172628091
HDL	rs144164168	20	44476037	T	C	0.0209	-0.0468036	0.00496074	3.92e-21	1239031	8.96523856146107e-05	111.091865346436
HDL	rs77617917	20	44563217	A	G	0.0771	-0.0584463	0.00257923	1.1e-113	1243524	0.000486130719223505	604.808260104728
HDL	rs149074578	20	44625065	A	C	0.0255	-0.0525463	0.00455268	8.12e-31	1236404	0.000137225967534571	169.68974655133
HDL	rs6066371	20	46143914	A	T	0.326	-0.0135087	0.00171611	3.5e-15	1021913	8.01926575970191e-05	81.9563312136343
HDL	rs11905856	20	46356466	G	A	0.189	0.016531	0.00181535	8.53e-20	1220791	8.3774318936238e-05	102.279335421517
HDL	rs3859588	20	46476143	A	T	0.222	-0.0096649	0.00167599	8.08e-09	1238791	3.22669039895983e-05	39.9731755369877
HDL	rs45551238	20	57607363	T	C	0.0111	0.0404518	0.00689607	4.47e-09	1228551	3.59236994313992e-05	44.1356105271529
HDL	rs8126001	20	62711459	T	C	0.484	0.0135804	0.00147987	4.44e-20	1043583	9.21192053207501e-05	96.1427089977839
HDL	rs2229741	21	16340289	T	C	0.423	-0.00932914	0.00138986	1.92e-11	1241915	4.24843909972706e-05	52.7641591297605
HDL	rs8133958	21	16844896	A	G	0.226	-0.010079	0.00172401	5.03e-09	1234038	3.5539743241368e-05	43.8588813239859
HDL	rs2254038	21	30745722	T	C	0.413	-0.0100811	0.00142559	1.53e-12	1232060	4.9275835203195e-05	60.7136786860036
HDL	rs4818226	21	42633065	A	G	0.323	0.0110549	0.00147968	7.95e-14	1233899	5.34479218207614e-05	65.9527554285881
HDL	rs8130925	21	43725765	T	G	0.498	0.00919342	0.00139213	4.01e-11	1238792	4.22588094964296e-05	52.3520029494015
HDL	rs235314	21	46271452	C	T	0.477	0.0176913	0.00139501	7.46e-37	1233904	0.00015615991278776	192.716123241641
HDL	rs9976784	21	46907479	A	G	0.201	-0.0185235	0.00171962	4.67e-27	1235230	0.000110209474542595	136.148833711724
HDL	rs2070512	22	21949411	C	A	0.205	-0.036325	0.00170617	1.39e-100	1238203	0.00043009285846875	532.770548256873
HDL	rs4823006	22	29451671	G	A	0.442	0.00906997	0.00138083	5.08e-11	1241080	4.05787033146215e-05	50.3633796329439
HDL	rs2023967	22	30907168	A	G	0.228	-0.0169226	0.00163822	5.16e-25	1243702	0.000100812949528024	125.393706637422
HDL	rs4820325	22	38599978	G	A	0.418	0.0196419	0.00141272	6.02e-44	1231178	0.000187713822444517	231.152143514376
HDL	rs2071887	22	38879010	A	T	0.343	-0.0114053	0.00147376	1e-14	1240089	5.86277074098992e-05	72.7077204857827
HDL	rs13054885	22	44345771	A	G	0.173	-0.0123406	0.00182238	1.27e-11	1243685	4.35766820289471e-05	54.1979404022226
LDL	rs1123571	1	2326009	A	G	0.469	-0.0109643	0.00142323	1.32e-14	1196667	5.98768823342302e-05	71.6568599878655
LDL	rs1497406	1	16505320	A	G	0.416	-0.0136287	0.00141025	4.29e-22	1225533	9.02495483094067e-05	110.613602016794
LDL	rs10753556	1	23732762	A	G	0.126	-0.0122229	0.00209345	5.26e-09	1228501	3.29048935927337e-05	40.4249590527559
LDL	rs10903129	1	25768937	A	G	0.452	-0.0258481	0.00138909	2.77e-77	1231258	0.000330983420152205	407.660250746976
LDL	rs12094989	1	26848386	T	C	0.215	-0.0129269	0.00169858	2.73e-14	1225752	5.64062062055555e-05	69.1438073963175
LDL	rs114165349	1	27021913	C	G	0.0233	0.0835384	0.00462313	5.53e-73	1231042	0.000317628461098464	391.13757717737
LDL	rs638769	1	42647030	G	C	0.293	-0.0084347	0.0015297	3.51e-08	1231009	2.94751694708152e-05	36.2852094574578
LDL	rs8681	1	45468606	A	G	0.256	-0.0112195	0.00159831	2.23e-12	1228643	4.7950142518272e-05	58.9163361005049
LDL	rs12117661	1	55487346	G	C	0.242	-0.0659791	0.00164207	0	1227744	0.00159708246577976	1963.94179771031
LDL	rs287227	1	55656075	T	G	0.135	-0.0592728	0.00203505	1.68e-186	1231244	0.000820522998673632	1011.09200217448
LDL	rs116293108	1	55735395	A	G	0.0263	0.0430367	0.00464914	2.1e-20	1225321	9.48612492591973e-05	116.246318352011
LDL	rs34721385	1	56406524	T	C	0.0749	-0.0202446	0.00274745	1.73e-13	1227663	5.67961496481162e-05	69.7303782901564
LDL	rs598253	1	62911341	C	T	0.338	-0.0421113	0.00149784	6.48e-174	1224087	0.000793600590830327	972.206122579829
LDL	rs6684364	1	78574129	A	G	0.247	-0.0095788	0.00161878	3.27e-09	1231229	3.41306167503101e-05	42.0239711736885
LDL	rs2391159	1	92971951	T	C	0.207	-0.0234181	0.00171891	2.89e-42	1231220	0.000180043248733178	221.712406440706
LDL	rs189974330	1	109729937	A	G	0.00801	0.0454574	0.00811032	2.08e-08	1214729	3.28381732596222e-05	39.8907256277007
LDL	rs4970829	1	109757295	A	G	0.0717	-0.104005	0.00269041	0	1231197	0.00143994511379676	1775.40971692787
LDL	rs6670347	1	109815368	C	T	0.0401	-0.109679	0.00353834	5.86e-211	1231182	0.000926077481838683	1141.22493680584
LDL	rs17036094	1	109834940	C	A	0.0117	-0.114341	0.00641661	4.99e-71	1227694	0.000302349061612548	371.303787500956
LDL	rs148631275	1	109927624	C	T	0.0177	0.0336814	0.00545881	6.82e-10	1227120	3.94482440397636e-05	48.4095600017234
LDL	rs10858093	1	109949756	T	C	0.0265	0.0443277	0.00473215	7.44e-21	1219627	0.000101382319091721	123.660947955925
LDL	rs115458560	1	110061974	C	T	0.0156	-0.0492575	0.005885	5.76e-17	1224109	7.4519671383222e-05	91.2268495727532
LDL	rs116276872	1	110068291	T	C	0.0198	-0.0462943	0.00522703	8.24e-19	1222992	8.31888129870348e-05	101.747550652977
LDL	rs115263569	1	110188763	G	A	0.0349	0.0283317	0.00438073	9.97e-11	1068698	5.40720714357855e-05	57.7897312656154
LDL	rs267733	1	150958836	G	A	0.156	-0.0187116	0.00190325	8.25e-23	1230294	9.21974459729357e-05	113.440239101251
LDL	rs113462784	1	154044453	C	T	0.119	0.0146369	0.0026158	2.2e-08	1048360	4.49211718311016e-05	47.0955854473964
LDL	rs4390169	1	155106054	A	G	0.485	0.0119697	0.00138496	5.49e-18	1230454	7.15723858718595e-05	88.0726889132769
LDL	rs115383270	1	161531340	A	G	0.0734	0.0193347	0.00274973	2.04e-12	1191572	5.08502657821674e-05	60.5947324563076
LDL	rs6665535	1	174491618	G	A	0.24	0.00952109	0.00165198	8.24e-09	1231248	3.30695412666989e-05	40.7180869349141
LDL	rs6682862	1	177938437	A	G	0.164	-0.0137009	0.00188331	3.47e-13	1231260	5.14728617113885e-05	63.3796350962334
LDL	rs1689801	1	182165484	A	G	0.325	0.0144266	0.00147894	1.76e-22	1230440	9.131562804195e-05	112.36847973498
LDL	rs2296288	1	183072590	T	C	0.437	-0.0113161	0.00140604	8.4e-16	1230426	6.3010566006711e-05	77.534598167157
LDL	rs1434282	1	199010721	C	T	0.277	-0.0109297	0.00157384	3.8e-12	1220646	4.78480832574128e-05	58.4082704634494
LDL	rs2642438	1	220970028	A	G	0.294	-0.0268921	0.00152599	1.65e-69	1218032	0.000300214360285578	365.779909640221
LDL	rs12138866	1	224432260	G	A	0.0396	-0.0240069	0.00365594	5.15e-11	1201419	4.38378755922078e-05	52.6698779159191
LDL	rs7544869	1	234734290	A	T	0.453	-0.0122329	0.00141112	4.36e-18	1217975	7.41607947092326e-05	90.3325447476948
LDL	rs553427	1	234852760	C	T	0.473	-0.0403134	0.00140727	1.77e-180	1227838	0.000810215611599882	995.618561385986
LDL	rs10910522	1	235011725	A	G	0.429	-0.0119292	0.00142231	4.98e-17	1197955	6.97181791169635e-05	83.524925033388
LDL	rs7512010	1	235111050	A	T	0.193	-0.0182638	0.00179491	2.56e-24	1198346	0.000103906597754841	124.528787342542
LDL	rs3935011	1	246891269	C	T	0.48	0.00893719	0.00140019	1.74e-10	1225699	3.98727838559731e-05	48.8739002923772
LDL	rs3820897	2	3642361	T	C	0.192	0.0159195	0.00176923	2.3e-19	1214850	7.8632381968128e-05	95.5339040276488
LDL	rs67269656	2	8720038	T	C	0.265	-0.0103803	0.00157377	4.23e-11	1225533	4.19742571724595e-05	51.4429126448665
LDL	rs880973	2	21078879	G	A	0.22	-0.013713	0.00167916	3.17e-16	1231239	6.45375138408e-05	79.4661034735579
LDL	rs4075673	2	21150787	T	C	0.45	0.0561747	0.00140136	0	1230952	0.00156202047544455	1925.77720767801
LDL	rs1712249	2	21385974	T	C	0.249	-0.0709637	0.00160713	0	1228637	0.00188339660072262	2318.37339910793
LDL	rs13005230	2	21914611	A	C	0.0999	-0.0179656	0.00263828	9.79e-12	1170956	5.80456525042067e-05	67.9727345041377
LDL	rs13403394	2	21942492	T	C	0.0313	-0.0262537	0.00397503	3.98e-11	1227970	4.17969574893551e-05	51.327471626438
LDL	rs1260326	2	27730940	T	C	0.39	0.0306622	0.00141948	1.76e-103	1228647	0.000447333128106072	549.859581588536
LDL	rs7599046	2	43238381	A	C	0.0496	-0.018004	0.00328702	4.32e-08	1221407	3.05601941023949e-05	37.3275146137276
LDL	rs10495907	2	43998726	A	G	0.138	0.030892	0.00201777	6.56e-53	1231260	0.000227043148253568	279.612176661271
LDL	rs56266464	2	44054991	A	G	0.0615	-0.113748	0.00290807	0	1231249	0.00149357462652799	1841.71000952836
LDL	rs191243200	2	44090361	A	G	0.0124	0.0659497	0.0063515	2.95e-25	1224464	0.000106526684577971	130.451773846676
LDL	rs35206901	2	44097360	G	A	0.185	-0.0390528	0.00177995	1.07e-106	1231244	0.000459900294193152	566.509095722751
LDL	rs17425376	2	44327351	T	C	0.104	0.0149335	0.0022689	4.65e-11	1231210	4.1561820005888e-05	51.1733721442915
LDL	rs4671050	2	62988169	T	G	0.32	-0.0223969	0.0015036	3.52e-50	1230373	0.000218305515606272	268.655424502971
LDL	rs954680	2	64913045	C	G	0.298	-0.0123572	0.0015382	9.47e-16	1220562	6.38886223427213e-05	77.9848792331296
LDL	rs11887443	2	85879041	T	G	0.263	-0.0124671	0.00175824	1.33e-12	1073701	6.02537551142254e-05	64.6982949276076
LDL	rs2970902	2	88429183	C	G	0.342	0.0101195	0.00147386	6.6e-12	1231236	4.6089299220678e-05	56.7493277734206
LDL	rs113313551	2	101662338	G	C	0.148	-0.0127	0.00195157	7.64e-11	1231157	4.067604768e-05	50.0805565605769
LDL	rs1992172	2	109093836	G	A	0.194	0.019503	0.00175889	1.43e-28	1231261	0.000118951413990552	146.477422735145
LDL	rs150474434	2	118845121	A	G	0.0949	-0.0423421	0.00238341	1.31e-70	1231176	0.00030799066958978	379.306927636151
LDL	rs17050272	2	121306440	A	G	0.421	-0.0228383	0.00144725	4.24e-56	1186453	0.000254283512691919	301.771663475459
LDL	rs1375131	2	135954797	C	T	0.313	0.0195868	0.00172675	8.02e-30	1087254	0.000164990161572723	179.415484940115
LDL	rs13011344	2	144186545	G	T	0.236	0.00969097	0.00163248	2.91e-09	1231254	3.38664640936449e-05	41.6995638650108
LDL	rs12614487	2	158434569	T	C	0.074	-0.026633	0.0026376	5.67e-24	1231256	9.7210433594072e-05	119.702371523874
LDL	rs10184004	2	165508389	T	C	0.413	-0.0104874	0.00140997	1.02e-13	1231171	5.33278179914911e-05	65.6590578030501
LDL	rs10184673	2	169827796	G	A	0.405	0.0220445	0.00142603	6.6e-54	1231166	0.000234208412481488	288.416515518591
LDL	rs12693968	2	203302627	A	G	0.258	0.0212882	0.00159951	2.05e-40	1230421	0.000173512788894137	213.530482467862
LDL	rs3814365	2	204305093	T	C	0.443	-0.0137336	0.00141565	2.98e-22	1222209	9.30802852052979e-05	113.773966253139
LDL	rs1250259	2	216300482	T	A	0.264	-0.0176512	0.00159409	1.7e-28	1230449	0.000121076597674476	148.99637635308
LDL	rs2382818	2	219155907	T	A	0.41	0.00825349	0.00143144	8.12e-09	1217906	3.29565030157324e-05	40.1391796958692
LDL	rs78058190	2	219699999	A	G	0.0524	0.0239644	0.00360947	3.15e-11	1199803	5.70321120089712e-05	68.4310877899394
LDL	rs6431630	2	234677386	A	G	0.105	0.0241194	0.00225665	1.16e-26	1230429	0.000109339058522862	134.548441160992
LDL	rs146194062	3	12271911	T	C	0.0117	-0.0701631	0.00704105	2.17e-23	1068321	0.000113847157302165	121.638929488231
LDL	rs13076933	3	12327431	G	T	0.257	-0.0245071	0.00159894	5.04e-53	1231121	0.00022936955845748	282.446005954288
LDL	rs6792725	3	24520283	A	G	0.319	0.015304	0.00156248	1.19e-22	1212395	0.000101760142078848	123.385839695979
LDL	rs9837622	3	32514647	A	T	0.073	-0.0370846	0.00270523	9.03e-43	1231252	0.000186131461721149	229.217026744404
LDL	rs2526385	3	50181135	T	G	0.188	-0.00995484	0.00178991	2.67e-08	1209413	3.02560648627088e-05	36.5931248256317
LDL	rs71311871	3	58420613	G	A	0.0814	-0.0379602	0.00252076	3.01e-51	1231258	0.000215495311377757	265.387084778201
LDL	rs55921103	3	69810294	G	T	0.359	-0.0126185	0.00147847	1.4e-17	1218788	7.32821053520555e-05	89.321749739485
LDL	rs7637250	3	100445155	G	C	0.343	0.00893913	0.00150183	2.65e-09	1218838	3.60147157683051e-05	43.8976130682355
LDL	rs9837149	3	122230845	C	G	0.153	0.0188877	0.0019215	8.39e-23	1231260	9.24619373525648e-05	113.855027317247
LDL	rs11719535	3	125087678	C	T	0.244	-0.0118243	0.00163478	4.73e-13	1221436	5.15813253977347e-05	63.0064345612599
LDL	rs2594205	3	127254061	A	G	0.122	0.012694	0.00215727	4e-09	1218730	3.4520838035552e-05	42.0729642913782
LDL	rs55732372	3	129314270	A	G	0.0758	0.0173547	0.0026697	8e-11	1228552	4.21987305923464e-05	51.8454382809097
LDL	rs74341202	3	132183991	A	G	0.0497	-0.0425579	0.00322656	1e-39	1220569	0.000171083250547175	208.854301343379
LDL	rs523118	3	135965888	T	G	0.211	-0.0144134	0.00177081	3.97e-16	1218799	6.91707258172985e-05	84.3109049604364
LDL	rs9653945	3	142660706	A	G	0.347	-0.012963	0.00145387	4.83e-19	1231249	7.6152417322158e-05	93.7695761505502
LDL	rs6441313	3	160036400	A	G	0.463	0.0125638	0.00141675	7.44e-19	1221451	7.84923444651353e-05	95.8819216514172
LDL	rs56118251	3	171534525	G	A	0.157	0.0136844	0.00188919	4.37e-13	1231243	4.95688385749987e-05	61.0342117709108
LDL	rs16861497	3	186731327	T	G	0.392	-0.00850125	0.00142443	2.4e-09	1218641	3.44496820248e-05	41.9831723599584
LDL	rs13108218	4	3443931	A	G	0.385	0.0182714	0.00146485	1.05e-35	1213113	0.000158091853646958	191.81329078821
LDL	rs4234798	4	7219933	T	G	0.39	-0.0110259	0.00141946	7.99e-15	1225532	5.7843230011398e-05	70.8927143394503
LDL	rs2034796	4	15112878	A	G	0.437	0.00792348	0.00141491	2.14e-08	1217982	3.0892407827906e-05	37.6274972902248
LDL	rs6448432	4	26098810	A	G	0.296	0.00874286	0.001515	7.89e-09	1229392	3.18567460850659e-05	39.1656127585001
LDL	rs12504134	4	39485834	T	C	0.342	-0.00886162	0.00146791	1.57e-09	1230419	3.53433930992298e-05	43.4886487433829
LDL	rs79623641	4	39999404	A	G	0.0677	-0.0179333	0.00282587	2.21e-10	1201421	4.05970779904959e-05	48.7760810086284
LDL	rs112575086	4	54429890	T	C	0.12	-0.0139398	0.0021344	6.53e-11	1231259	4.1039966677248e-05	50.532820116382
LDL	rs146674238	4	69312382	T	A	0.0143	0.047162	0.00654042	5.56e-13	1212968	6.27039958776889e-05	76.0625844917612
LDL	rs34707604	4	69491456	C	T	0.248	0.0317679	0.00186917	8.83e-65	1129915	0.000376423328867167	425.48577556231
LDL	rs149314105	4	69519916	T	C	0.0275	-0.0338636	0.00500413	1.31e-11	1198422	6.1336437872798e-05	73.5113227982023
LDL	rs72663045	4	74177397	G	T	0.0196	0.0403007	0.00503784	1.25e-15	1231178	6.24186755054171e-05	76.8531723072813
LDL	rs342467	4	88052219	T	C	0.399	-0.0101553	0.00141921	8.33e-13	1231199	4.94609983757278e-05	60.8992449546568
LDL	rs11499828	4	100277558	C	T	0.108	0.0165038	0.0022549	2.5e-13	1231258	5.24791158509837e-05	64.6186173941271
LDL	rs28497720	4	100487370	T	C	0.251	-0.0175436	0.00159642	4.3e-28	1231260	0.000115723875205158	142.502438071712
LDL	rs17617028	4	106064683	A	G	0.217	0.0132543	0.00167534	2.54e-15	1231250	5.96987288752088e-05	73.5083288839392
LDL	rs721412	4	110947478	G	A	0.31	-0.00925357	0.00151888	1.11e-09	1228581	3.66318970032682e-05	45.0068280738687
LDL	rs138204164	4	120123417	G	C	0.132	-0.0145038	0.00206177	2e-12	1230447	4.82044638593549e-05	59.3158008198008
LDL	rs952225	4	151454015	C	T	0.354	-0.00840698	0.00145289	7.19e-09	1231254	3.23255411643039e-05	39.8021738364403
LDL	rs41280463	4	154191226	A	G	0.167	-0.0152278	0.00185837	2.52e-16	1231254	6.45157568777305e-05	79.4402798369997
LDL	rs116692022	4	155448758	G	A	0.013	0.0455428	0.0064595	1.78e-12	1224200	5.32267508662781e-05	65.1635504010587
LDL	rs72701754	4	185251995	T	A	0.404	0.0091812	0.00143827	1.73e-10	1201448	4.05935017228339e-05	48.7728801328856
LDL	rs116734477	5	52095024	T	C	0.0377	-0.0511426	0.00366166	2.48e-44	1231253	0.000189778687043106	233.709551292305
LDL	rs112838464	5	53308819	A	G	0.11	0.0135742	0.00221831	9.41e-10	1231241	3.6077893724312e-05	44.4221124474801
LDL	rs2434583	5	57620041	C	A	0.469	0.0081978	0.00145351	1.7e-08	1189693	3.34727964764575e-05	39.8236177207241
LDL	rs3010275	5	72014761	G	T	0.21	-0.0183321	0.001703	5.06e-27	1231219	0.000111506662438038	137.304208741029
LDL	rs145275181	5	74201340	G	T	0.0121	0.0413513	0.00732978	1.69e-08	1212638	4.08796045768749e-05	49.5741067455643
LDL	rs2112653	5	74562564	C	T	0.437	0.0601913	0.00144448	0	1217004	0.00178273698262041	2173.46919724152
LDL	rs113776580	5	74950420	A	G	0.0137	0.0449615	0.00596221	4.66e-14	1230272	5.4631255248943e-05	67.2148664276414
LDL	rs72768400	5	75046359	T	G	0.041	-0.0287596	0.00379353	3.42e-14	1215410	6.50426372982781e-05	79.0584838857183
LDL	rs2617447	5	96267655	G	A	0.426	0.0084492	0.00140646	1.88e-09	1228631	3.49126382040307e-05	42.8961773827014
LDL	rs6869845	5	122833703	C	T	0.451	-0.0167463	0.00139999	5.64e-33	1230360	0.000138872615862161	170.886765399063
LDL	rs2706381	5	131810619	T	C	0.196	-0.0195199	0.00175196	7.86e-29	1227720	0.00012008735869448	147.451118857069
LDL	rs13153174	5	139579421	G	C	0.214	-0.0107672	0.00168982	1.87e-10	1231148	3.90006527013427e-05	48.0173702794292
LDL	rs11167778	5	141888881	T	C	0.107	0.0218031	0.00225008	3.33e-22	1230451	9.08451456628102e-05	111.790474257577
LDL	rs543486395	5	156375335	A	C	0.0233	-0.0488051	0.00600679	4.47e-16	1063383	0.000108412040418772	115.295803405853
LDL	rs12657266	5	156396003	C	T	0.365	-0.0353193	0.00143731	2.44e-133	1227808	0.00057825681612674	710.3979808559
LDL	rs13360569	5	156422887	T	C	0.43	-0.00977922	0.00140806	3.78e-12	1220531	4.68793670948777e-05	57.220309492838
LDL	rs352942	5	176528386	A	G	0.252	-0.0104223	0.00163487	1.83e-10	1212243	4.09505061636317e-05	49.6439154857741
LDL	rs272441	5	179301260	A	G	0.0899	0.0137103	0.00245056	2.21e-08	1211476	3.07590357926167e-05	37.2649183607822
LDL	rs147539187	6	11839042	G	C	0.0685	-0.0230509	0.00276217	7.11e-17	1230447	6.78077290592136e-05	83.4393390143568
LDL	rs2235215	6	16131156	C	T	0.321	-0.0318004	0.00148636	1.49e-101	1230411	0.000440828808143667	542.638943878123
LDL	rs1418970	6	18773180	T	A	0.451	0.00906541	0.00151493	2.18e-09	1089177	4.06961929100862e-05	44.3270798562361
LDL	rs1800562	6	26093141	A	G	0.0682	-0.0571711	0.00276108	3.05e-95	1230196	0.000415422651253196	511.262843201585
LDL	rs78408557	6	27147693	T	C	0.0132	0.0401555	0.00671802	2.27e-09	1208498	4.20071428410665e-05	50.7675966965436
LDL	rs1061537	6	29937795	A	G	0.444	0.0135884	0.00159695	1.75e-17	993983	9.11642162574797e-05	90.6237604839247
LDL	rs28732146	6	31561353	A	T	0.196	0.0140004	0.00180155	7.77e-15	1162197	6.17764579320269e-05	71.8007261208487
LDL	rs6689	6	32627700	G	A	0.203	0.0389564	0.0018946	6.03e-94	1211341	0.000491068399450839	595.14255962658
LDL	rs114863007	6	34729158	A	G	0.0968	-0.0267129	0.00235203	6.82e-30	1230379	0.00012477608604012	153.540784631939
LDL	rs62406547	6	37040428	C	A	0.496	-0.0127913	0.00155124	1.64e-16	1049765	8.18034420896179e-05	85.8812521603613
LDL	rs17665178	6	52435243	G	C	0.302	-0.0158917	0.00156116	2.45e-24	1216535	0.000106471427570993	129.539797484388
LDL	rs12662589	6	53509035	C	G	0.259	0.015299	0.00158398	4.52e-22	1231247	8.9840892361038e-05	110.626088261554
LDL	rs9496567	6	100602753	A	G	0.236	-0.0209744	0.00164372	2.73e-37	1231243	0.000158640638606459	195.355849895238
LDL	rs62419249	6	101447338	A	G	0.478	0.0121051	0.00140411	6.63e-18	1225747	7.31248786292623e-05	89.6390091970931
LDL	rs4946713	6	106374015	A	C	0.447	-0.0112055	0.00139973	1.19e-15	1228646	6.20762008974555e-05	76.2742865933912
LDL	rs1556857	6	116325559	C	T	0.407	-0.0168848	0.00140839	4.07e-33	1231252	0.00013761663676395	169.463805054518
LDL	rs72971192	6	127088318	C	T	0.235	-0.0118179	0.0016831	2.19e-12	1202168	5.02157455054155e-05	60.3706934706426
LDL	rs141783576	6	127439897	C	G	0.069	0.0240255	0.0030723	5.28e-15	1089171	7.41606686148195e-05	80.7794919356667
LDL	rs9399137	6	135419018	C	T	0.262	-0.0255597	0.00158355	1.32e-58	1230371	0.000252638278302772	310.916855336131
LDL	rs76933614	6	139290015	C	T	0.0771	0.0231794	0.00267339	4.31e-18	1231192	7.64616031960811e-05	94.1459597900031
LDL	rs8191774	6	160461793	C	T	0.0164	-0.0340348	0.00551071	6.57e-10	1227976	3.73713485367814e-05	45.8927594224132
LDL	rs112170089	6	160502019	A	G	0.0181	0.0521114	0.00593457	1.62e-18	1093937	9.6525333832466e-05	105.602634395557
LDL	rs12208357	6	160543148	T	C	0.0696	0.0644647	0.00269768	3.34e-126	1231254	0.000538211370765993	663.030677328076
LDL	rs146534110	6	160578069	T	G	0.0115	0.0760646	0.00664093	2.25e-30	1229094	0.000131543587300479	161.700441458458
LDL	rs139451770	6	160759810	C	A	0.00559	-0.054927	0.00977269	1.9e-08	1204365	3.35412346846637e-05	40.39717699972
LDL	rs144833821	6	160813782	C	T	0.00941	-0.0498411	0.00760725	5.69e-11	1215692	4.63114944772111e-05	56.3030281983802
LDL	rs117733303	6	160922870	G	A	0.0176	0.145329	0.00530255	2.24e-165	1230382	0.000730357658622536	899.274247850115
LDL	rs118039278	6	160985526	A	G	0.0691	0.113646	0.00277251	0	1228684	0.00166157283096046	2044.9424499058
LDL	rs12055389	6	161091952	T	C	0.0574	-0.0277593	0.003005	2.52e-20	1231114	8.33846949533764e-05	102.664459218056
LDL	rs61730955	7	943868	A	G	0.0564	0.016898	0.00303299	2.53e-08	1212928	3.03925852403443e-05	36.8650772702332
LDL	rs10272002	7	1047615	G	A	0.21	-0.0223057	0.00171399	1.02e-38	1224482	0.000165085182976182	202.176881258111
LDL	rs34927723	7	21422925	T	C	0.157	-0.0133769	0.00193079	4.26e-12	1230441	4.73661606534742e-05	58.2839320343884
LDL	rs55696093	7	21605973	G	A	0.211	0.0382032	0.0017054	3.82e-111	1230421	0.00048594703690133	598.209165168358
LDL	rs896311	7	25934357	G	A	0.3	-0.0165774	0.00152682	1.84e-27	1220604	0.0001154202801192	140.898487296928
LDL	rs56001710	7	25983400	A	T	0.423	-0.0136714	0.00172087	1.95e-15	965151	9.12372436637503e-05	88.0655693446336
LDL	rs12533280	7	36171953	T	C	0.195	0.0180348	0.00175998	1.22e-24	1230451	0.000102113496766008	125.658281388748
LDL	rs7808613	7	41746922	G	C	0.245	0.011275	0.00163494	5.34e-12	1224960	4.703012496875e-05	57.6126373510045
LDL	rs17725246	7	44581986	C	T	0.195	0.0427777	0.00178857	2.03e-126	1199168	0.000574507031248196	689.325320877435
LDL	rs799157	7	73020301	T	C	0.0363	0.0317878	0.00387352	2.28e-16	1211433	7.06967457943836e-05	85.6502846508371
LDL	rs1057868	7	75615006	T	C	0.288	0.0115162	0.00152729	4.69e-14	1231038	5.43902273609933e-05	66.9599698975545
LDL	rs1014283	7	87076587	A	C	0.183	-0.0136301	0.00179818	3.46e-14	1231240	5.55521953287622e-05	68.4017737408902
LDL	rs6967728	7	97915637	A	G	0.183	-0.0179411	0.00183651	1.53e-22	1218807	9.62501191213126e-05	117.321418636171
LDL	rs564449	7	100321138	T	G	0.115	0.0267236	0.00218062	1.58e-34	1218830	0.000145365394721208	177.201172235608
LDL	rs1838931	7	130455588	T	C	0.312	0.0113437	0.00152716	1.1e-13	1221309	5.52436662502733e-05	67.4732037642721
LDL	rs35106682	7	134383407	A	C	0.493	0.00782023	0.00139458	2.05e-08	1231064	3.05720053387192e-05	37.6371846805053
LDL	rs34372369	7	143092269	A	G	0.0508	0.0192832	0.00310689	5.41e-10	1231082	3.58599474505187e-05	44.1480472540392
LDL	rs4374942	7	155026807	C	T	0.0808	0.0199517	0.00255281	5.47e-15	1231236	5.9130449998786e-05	72.8077256273851
LDL	rs11761517	7	158532706	T	C	0.461	-0.00818549	0.00143473	1.16e-08	1194294	3.3297302436075e-05	39.7680260889769
LDL	rs2936512	8	6599005	T	C	0.326	-0.0119104	0.00148144	9e-16	1231262	6.23390509796557e-05	76.7603650775226
LDL	rs49675	8	9151688	A	G	0.0912	0.0131875	0.00241881	4.98e-08	1231261	2.882823792e-05	35.4960506817356
LDL	rs9987289	8	9183358	A	G	0.0918	-0.0598584	0.00239036	2.16e-138	1231258	0.000597453875465214	736.05842985128
LDL	rs10108282	8	9720946	A	T	0.212	0.013887	0.0017083	4.32e-16	1231238	6.4433087908128e-05	79.3374493805022
LDL	rs13255048	8	18276640	A	G	0.141	0.020952	0.00198805	5.71e-26	1231235	0.000106339164308352	130.942212574323
LDL	rs151150389	8	28897171	C	T	0.0337	0.0297667	0.00382611	7.26e-15	1230449	5.77076324557338e-05	71.0102810674607
LDL	rs117139027	8	29024943	A	G	0.0131	-0.0782787	0.00642262	3.6e-34	1081192	0.00015843883830693	171.329632857067
LDL	rs34265667	8	41542093	A	G	0.0311	-0.0244429	0.00400661	1.06e-09	1230452	3.60059938192177e-05	44.3051703465461
LDL	rs28615248	8	55451193	C	T	0.196	0.0244134	0.00175688	6.71e-44	1230402	0.000187844571730126	231.167384595104
LDL	rs9297994	8	59392324	G	A	0.338	0.0355062	0.00146485	8.68e-130	1230341	0.000564174009984761	694.517115776852
LDL	rs12114596	8	61518399	T	C	0.347	0.0117407	0.00161291	3.36e-13	1059436	6.24684361446112e-05	66.1853196718456
LDL	rs62509311	8	74907295	T	A	0.279	-0.0152619	0.00156162	1.47e-22	1231219	9.3710158165352e-05	115.388352866668
LDL	rs2941465	8	76465909	T	C	0.437	-0.00842039	0.00139864	1.74e-09	1231262	3.48886561180338e-05	42.9585054964159
LDL	rs2737245	8	116658583	T	G	0.277	-0.0253718	0.00155136	4.04e-60	1231202	0.0002578401947995	317.534721051476
LDL	rs2954017	8	126476873	T	C	0.474	0.0554669	0.00139905	0	1220643	0.00153412896570694	1875.49797059129
LDL	rs28894779	8	126536611	A	G	0.0345	-0.0236641	0.00383617	6.89e-10	1230405	3.73062290765078e-05	45.9034086575012
LDL	rs45613837	8	141744917	A	G	0.451	-0.00793402	0.00142815	2.77e-08	1220596	3.11720571507234e-05	38.0496120105102
LDL	rs11787335	8	145044104	T	C	0.355	0.0231214	0.00146651	5.31e-56	1221689	0.000244819675228782	299.166256356946
LDL	rs3780181	9	2640759	G	A	0.0696	-0.0358747	0.0027624	1.45e-38	1231175	0.000166680768052744	205.2470719854
LDL	rs28498684	9	16900695	A	G	0.4	0.0131553	0.00141998	1.96e-20	1218839	8.30697206832e-05	101.256860527471
LDL	rs12551960	9	19267440	T	C	0.0786	0.0349877	0.00264871	7.75e-40	1231241	0.000177309309160581	218.348851785631
LDL	rs615552	9	22026077	C	T	0.439	0.00870666	0.00140987	6.6e-10	1216589	3.73388164589776e-05	45.4276149127536
LDL	rs60988380	9	33117954	T	C	0.103	0.0130636	0.00230171	1.38e-08	1230305	3.15344609509987e-05	38.798165390628
LDL	rs7864568	9	78212428	A	G	0.316	-0.0155516	0.00155864	1.91e-23	1192893	0.000104549830877537	124.729592763165
LDL	rs1571791	9	78729213	T	C	0.38	0.0138569	0.00143531	4.71e-22	1228648	9.0476844889832e-05	111.174072245803
LDL	rs9410207	9	91404799	C	T	0.0656	-0.0200359	0.00282853	1.41e-12	1226916	4.92135139495252e-05	60.383720948961
LDL	rs2066714	9	107586753	C	T	0.124	0.0190072	0.00209648	1.23e-19	1225087	7.84859783149363e-05	96.1595419196756
LDL	rs11789603	9	107647019	T	C	0.101	0.0235557	0.00232397	3.83e-24	1230649	0.000100763464310179	124.016751420434
LDL	rs2740488	9	107661742	C	A	0.261	-0.0249217	0.00158221	6.74e-56	1230649	0.000239590872469865	294.922449159327
LDL	rs56294298	9	117133524	A	G	0.0847	-0.0183291	0.00261275	2.3e-12	1228531	5.20905747906409e-05	63.9981154555909
LDL	rs7025486	9	124422403	A	G	0.263	0.009415	0.00157012	2.02e-09	1230453	3.436322222795e-05	42.2837141582696
LDL	rs6478851	9	131561110	A	G	0.236	-0.0131604	0.00163805	9.42e-16	1227798	6.24559093835213e-05	76.687905330316
LDL	rs2519093	9	136141870	T	C	0.188	0.0724494	0.00175473	0	1230436	0.00160255690756463	1975.00556481275
LDL	rs76643124	9	136356448	A	G	0.0243	-0.0289355	0.00450465	1.33e-10	1223587	3.9702198541158e-05	48.5809433722418
LDL	rs13301660	9	139340802	T	C	0.27	-0.0156411	0.00156988	2.21e-23	1215727	9.6438668430582e-05	117.254208017458
LDL	rs263423	10	8089033	A	G	0.201	-0.0106027	0.00175555	1.55e-09	1211478	3.61081949950534e-05	43.745791221387
LDL	rs7903259	10	17259642	G	C	0.416	0.0163158	0.00142246	1.86e-30	1201162	0.00012934597520812	155.385310045447
LDL	rs12354765	10	43918823	A	T	0.248	-0.0106306	0.00175342	1.34e-09	1062685	4.21516977450291e-05	44.7957808329947
LDL	rs1031101	10	54533360	G	A	0.142	0.0120767	0.00197776	1.02e-09	1231262	3.55387529131721e-05	43.7590000521628
LDL	rs1896995	10	65365385	C	T	0.498	-0.0121975	0.00141088	5.37e-18	1218730	7.438831289295e-05	90.6658642760796
LDL	rs17476364	10	71094504	C	T	0.0989	-0.0268457	0.00233191	1.14e-30	1231133	0.000128454328223565	158.164422464842
LDL	rs1870140	10	82246749	A	G	0.157	-0.0124748	0.00192407	8.96e-11	1225967	4.11930933363581e-05	50.5033710621862
LDL	rs2068888	10	94839642	A	G	0.451	-0.0180327	0.00139568	3.45e-38	1220196	0.000161027628595869	196.516590847512
LDL	rs61886346	10	96101364	T	C	0.0612	-0.0192465	0.00291427	4e-11	1230415	4.25655281837167e-05	52.375408616043
LDL	rs603424	10	102075479	A	G	0.169	0.0158621	0.0018835	3.71e-17	1222742	7.0670650852808e-05	86.4179388357453
LDL	rs78531123	10	104082953	A	G	0.0611	0.0182966	0.00291554	3.48e-10	1201449	3.8408852485825e-05	46.1479730832277
LDL	rs2792751	10	113940329	T	C	0.281	0.023866	0.00153005	7.49e-55	1230453	0.000230157153928568	283.262295052205
LDL	rs60847460	10	113983758	T	C	0.14	-0.0181506	0.00198944	7.28e-20	1230320	7.9330182710688e-05	97.6090950795951
LDL	rs2301179	10	118404620	A	G	0.492	-0.0158997	0.00139539	4.46e-30	1227839	0.000126367871586108	155.178757954031
LDL	rs7904973	10	124693587	G	T	0.424	-0.0209679	0.00140615	2.77e-50	1223462	0.000214747545708104	262.791466094413
LDL	rs11246280	11	707424	C	T	0.478	0.00823274	0.00142469	7.53e-09	1213269	3.38233948421454e-05	41.0381968410806
LDL	rs7124487	11	2988323	T	C	0.186	-0.011576	0.00182058	2.04e-10	1230443	4.0577415403008e-05	49.9301416219903
LDL	rs7108486	11	5677158	C	T	0.0244	-0.0322033	0.00457976	2.04e-12	1230091	4.93733243178507e-05	60.7365819037769
LDL	rs12271333	11	5690691	C	A	0.134	0.0164797	0.00203348	5.31e-16	1230452	6.30305778899439e-05	77.5608632707151
LDL	rs11601507	11	5701074	A	C	0.07	0.0404129	0.00317615	4.36e-37	841664	0.000212642963730582	179.011567689705
LDL	rs214080	11	17299762	A	G	0.414	-0.00804652	0.00143211	1.92e-08	1196938	3.1415512062239e-05	37.603538680151
LDL	rs10832956	11	18645668	T	C	0.272	-0.0208132	0.00155842	1.1e-40	1227839	0.000171556822576456	210.679957945973
LDL	rs223042	11	32113944	C	G	0.136	0.0116984	0.00201287	6.18e-09	1231184	3.21614470221005e-05	39.5978681923038
LDL	rs61882680	11	46370636	T	C	0.0304	-0.0279637	0.00410924	1.01e-11	1231245	4.60983578249352e-05	56.7608969675856
LDL	rs174547	11	61570783	C	T	0.346	-0.0429432	0.00145569	2.86e-191	1230440	0.000834588987926584	1027.76776878839
LDL	rs77631946	11	63688374	A	C	0.0931	-0.0187374	0.00246206	2.73e-14	1219759	5.92867624191725e-05	72.3197310708368
LDL	rs56223081	11	65961498	T	G	0.0492	0.0187347	0.00330254	1.4e-08	1230427	3.28380800855608e-05	40.4061215487315
LDL	rs1638586	11	67174597	A	G	0.0796	-0.0195809	0.00257382	2.79e-14	1230291	5.61804187989933e-05	69.122034568645
LDL	rs78643851	11	69706362	T	G	0.0213	0.0348153	0.00538983	1.05e-10	1206954	5.0535837921811e-05	60.9974132067931
LDL	rs10899485	11	78072383	C	T	0.163	-0.0117891	0.00188189	3.74e-10	1226138	3.79231462778542e-05	46.5006983373281
LDL	rs11226108	11	103870755	C	G	0.191	-0.0142732	0.00180053	2.24e-15	1230403	6.29585311372131e-05	77.4691170115737
LDL	rs964184	11	116648917	G	C	0.135	0.0552411	0.00201933	9.12e-165	1227839	0.000712696305626996	875.699001255169
LDL	rs141469619	11	116714293	G	A	0.0092	0.0725318	0.00796181	8.24e-20	1221185	9.59093022855533e-05	117.134043737388
LDL	rs12970	11	117074109	A	G	0.0614	-0.0267765	0.00289824	2.49e-20	1230419	8.26392819148112e-05	101.689180856661
LDL	rs11218753	11	122553836	T	A	0.256	0.0091906	0.00159437	8.19e-09	1226078	3.21758942719181e-05	39.4513611281608
LDL	rs4307732	11	126244955	A	G	0.108	0.047985	0.00221699	6.89e-104	1230366	0.0004436388836712	546.079573601661
LDL	rs55943924	11	134294813	A	G	0.119	-0.0119692	0.00214672	2.47e-08	1230232	3.00388369313379e-05	36.9557884669433
LDL	rs35882350	12	623129	G	A	0.256	0.0181651	0.00162585	5.55e-29	1213975	0.000125695139000033	152.609687273142
LDL	rs117233107	12	4328521	A	G	0.0148	-0.0459407	0.00599266	1.77e-14	1224100	6.15476294968481e-05	75.3449674759754
LDL	rs75667995	12	25409070	C	T	0.0682	-0.0291431	0.00273128	1.4e-26	1231245	0.000107946500969943	132.9227222365
LDL	rs11048637	12	26825183	T	G	0.488	-0.00875979	0.00155	1.59e-08	1055486	3.83448610528469e-05	40.4739392910814
LDL	rs10843390	12	29496991	T	C	0.28	-0.0097591	0.00154733	2.84e-10	1226943	3.8400781228992e-05	47.117302263097
LDL	rs11175540	12	40586295	A	T	0.0661	0.0260974	0.00284853	5.11e-20	1201269	8.40865075407627e-05	101.018840975503
LDL	rs2250751	12	51106178	A	G	0.341	-0.0165291	0.00147712	4.56e-29	1223154	0.000122791471399993	150.211078465189
LDL	rs7300192	12	51794043	A	G	0.365	0.0134682	0.00146867	4.72e-20	1205486	8.4084452230302e-05	101.370985536184
LDL	rs74090765	12	53792914	G	T	0.173	0.0144654	0.00183467	3.16e-15	1226945	5.98745831749567e-05	73.4670995163915
LDL	rs61754230	12	72179446	T	C	0.0158	0.0491427	0.00574339	1.16e-17	1100434	7.51083931618926e-05	82.6578876050479
LDL	rs12306780	12	89921860	T	A	0.342	0.0115655	0.00146541	2.97e-15	1218828	6.0201986389398e-05	73.3801638946724
LDL	rs1515565	12	92818786	A	G	0.482	-0.00927654	0.00139218	2.68e-11	1220314	4.29713340678472e-05	52.4406880653284
LDL	rs11837065	12	100859983	T	C	0.366	-0.0111241	0.00147305	4.29e-14	1217814	5.74288483887113e-05	69.9415573770479
LDL	rs1850956	12	103453387	T	C	0.494	-0.00823251	0.00141002	5.26e-09	1218011	3.38822307061452e-05	41.2702602686409
LDL	rs3184504	12	111884608	T	C	0.473	-0.0234144	0.00139369	2.43e-63	1230454	0.000273317738322309	336.396300830285
LDL	rs1169288	12	121416650	C	A	0.322	0.0358725	0.0014912	7.2e-128	1230241	0.00056187388823895	691.627777982026
LDL	rs2247139	12	122380274	A	G	0.132	0.0132285	0.00204579	1e-10	1230444	4.0100044573512e-05	49.3427576919041
LDL	rs2451322	12	124545515	G	A	0.405	-0.0106423	0.00142294	7.48e-14	1220630	5.45849578303155e-05	66.6315649876674
LDL	rs11057841	12	125316743	T	C	0.141	0.0218674	0.0020187	2.42e-27	1223721	0.000115834137825417	141.76485651551
LDL	rs75588192	12	133048600	A	G	0.14	0.0164726	0.0021227	8.48e-15	1097902	6.5340249423008e-05	71.7417474651939
LDL	rs5026917	13	31010795	C	A	0.386	-0.00885758	0.00146939	1.66e-09	1188237	3.71891145721213e-05	44.1910509796624
LDL	rs7997102	13	32445660	C	T	0.318	-0.00840639	0.00148711	1.58e-08	1226936	3.0652122975709e-05	37.6092846554969
LDL	rs7327867	13	32968591	G	A	0.474	0.0198561	0.00139678	7.33e-46	1224331	0.000196599307720852	240.74956502038
LDL	rs208432	13	33122007	C	T	0.386	0.0106618	0.00143212	9.71e-14	1226912	5.38823755515939e-05	66.1123876805077
LDL	rs17532371	13	41635301	G	C	0.0706	-0.0193589	0.00271228	9.5e-13	1231232	4.91811543204001e-05	60.5562908621922
LDL	rs4942833	13	50081358	C	T	0.475	0.0082772	0.00139348	2.85e-09	1224280	3.41703798702e-05	41.8354738607626
LDL	rs9535755	13	52339143	G	C	0.172	0.0114717	0.00183435	4.01e-10	1231233	3.74838629703005e-05	46.1530240824164
LDL	rs9592980	13	74855425	G	A	0.415	-0.0095033	0.00142143	2.3e-11	1218812	4.38513367726395e-05	53.4487915728201
LDL	rs9543956	13	76098660	T	G	0.272	-0.00888884	0.00159449	2.48e-08	1199612	3.12910730793071e-05	37.5382587890666
LDL	rs7330899	13	95223400	A	G	0.244	0.0143148	0.00161093	6.33e-19	1231229	7.55983273738291e-05	93.085738943664
LDL	rs551473284	13	111038325	T	C	0.366	-0.0152014	0.0016659	7.17e-20	932168	0.000107242644014892	99.9786684775389
LDL	rs6602909	13	114551993	C	T	0.33	0.0211903	0.00151305	1.45e-44	1193828	0.000198560541590598	237.093814601172
LDL	rs12016920	13	114639025	C	T	0.193	-0.0171653	0.00180179	1.62e-21	1218065	9.17832930490832e-05	111.80809539643
LDL	rs11621792	14	24871926	T	C	0.449	0.0219774	0.00142294	8.14e-54	1215093	0.000238990457591826	290.464572366774
LDL	rs11846704	14	35186694	T	C	0.267	-0.0137613	0.00156628	1.55e-18	1231179	7.41249062421752e-05	91.2676448981435
LDL	rs114491880	14	51373247	T	A	0.0178	0.0334713	0.00533103	3.42e-10	1227530	3.91737446846801e-05	48.0887522818001
LDL	rs17101394	14	64232386	A	G	0.16	0.0153532	0.00190294	7.14e-16	1225533	6.3361737664512e-05	77.6566941848119
LDL	rs7157399	14	70846954	T	C	0.14	-0.0253853	0.00200506	9.77e-37	1220634	0.000155174760226472	189.440674335976
LDL	rs13379043	14	74250126	C	T	0.271	-0.0165377	0.00156818	5.31e-26	1222723	0.000108063003381062	132.145183562514
LDL	rs34752362	14	75232306	A	G	0.443	-0.00964234	0.00141299	8.85e-12	1223509	4.58832106028499e-05	56.14100528463
LDL	rs17776811	14	90066451	A	C	0.397	0.00937185	0.00141889	3.97e-11	1225534	4.20521759075894e-05	51.5384545485365
LDL	rs28929474	14	94844947	T	C	0.018	0.0527623	0.00518309	2.44e-24	1229467	9.84150293712041e-05	121.009743263305
LDL	rs17580	14	94847262	A	T	0.0387	0.0498131	0.00361468	3.33e-43	1222974	0.000184623526725368	225.831097460034
LDL	rs28375625	15	49742494	A	C	0.461	-0.00909575	0.00140542	9.68e-11	1218841	4.11146612550039e-05	50.1142130382808
LDL	rs79391862	15	53739426	C	A	0.0202	-0.0639367	0.00532487	3.26e-33	1222627	0.000161815170175005	197.871291011844
LDL	rs148086620	15	57415927	G	A	0.0422	0.0297385	0.00354558	4.97e-17	1231188	7.14916626654078e-05	88.0258273031242
LDL	rs686958	15	58741884	T	A	0.181	0.0115423	0.00181318	1.94e-10	1218743	3.94981894313206e-05	48.1399643271473
LDL	rs11636087	15	63788267	C	T	0.298	0.0144221	0.00154909	1.28e-20	1218840	8.70242676069967e-05	106.077715617088
LDL	rs12917376	15	75116167	C	T	0.423	-0.0125937	0.00142309	8.79e-19	1213921	7.7419945870436e-05	93.9888198804413
LDL	rs1567670	15	77275072	A	G	0.183	-0.00989616	0.00181285	4.79e-08	1226923	2.92844153885548e-05	35.930716422966
LDL	rs8038512	15	89106233	T	G	0.356	-0.00924136	0.00148063	4.33e-10	1216216	3.91595451134118e-05	47.6282521012498
LDL	rs8029797	15	101906159	A	T	0.313	-0.00949676	0.00149208	1.96e-10	1224331	3.87866253978989e-05	47.4894322416028
LDL	rs17703146	16	4860105	C	T	0.162	0.0112556	0.00195693	8.84e-09	1230393	3.43974565266163e-05	42.3237767635112
LDL	rs12445804	16	11706100	A	G	0.0763	0.0325513	0.00267884	5.65e-34	1222975	0.000149355820678517	182.68542121368
LDL	rs72772042	16	15863759	A	C	0.146	-0.0123084	0.00195634	3.14e-10	1230431	3.77784317189261e-05	46.4854341082849
LDL	rs35468353	16	31056433	G	A	0.377	0.0118798	0.00143087	1.02e-16	1227839	6.62945231296057e-05	81.404265052818
LDL	rs74019283	16	55870239	T	G	0.0385	-0.0208027	0.00375364	2.99e-08	1227123	3.20390349270788e-05	39.3170322585216
LDL	rs247617	16	56990716	A	C	0.321	-0.0366691	0.00148161	3.14e-135	1230433	0.000586145323059786	721.634358602029
LDL	rs4788817	16	71641395	C	T	0.378	0.0117675	0.0014469	4.19e-16	1220159	6.511493241855e-05	79.4556143419788
LDL	rs34042070	16	72101525	G	C	0.191	0.0572597	0.00176304	2.19e-231	1226892	0.00101323462200709	1244.38828268551
LDL	rs7202323	16	72217113	G	T	0.228	-0.0228745	0.00166334	4.94e-43	1231251	0.000184198191856008	226.835622235982
LDL	rs7404072	16	73096750	C	T	0.286	-0.0102936	0.00155156	3.26e-11	1217116	4.32741769376717e-05	52.6718859218283
LDL	rs67890964	16	83979317	C	T	0.381	-0.0182605	0.0014752	3.42e-35	1201951	0.000157279076470999	189.071165623558
LDL	rs576285576	16	88527501	G	A	0.0778	-0.0221474	0.00366466	1.51e-09	858775	7.0385015308444e-05	60.4490054556528
LDL	rs539705186	16	88572668	G	T	0.0833	0.0209128	0.00304182	6.19e-12	899833	6.67923304367973e-05	60.1058240973381
LDL	rs7213347	17	2153257	G	C	0.301	0.00853247	0.001524	2.16e-08	1220624	3.06353754357301e-05	37.3953588559699
LDL	rs55714927	17	7080316	T	C	0.189	-0.0349154	0.00183132	4.87e-81	1188821	0.000373720307608655	444.451903072948
LDL	rs150688657	17	7505801	A	G	0.103	0.0215663	0.00231561	1.24e-20	1230359	8.59430867481896e-05	105.749766843628
LDL	rs10462024	17	8051639	G	A	0.422	0.0090282	0.00145453	5.4e-10	1213113	3.97624034667197e-05	48.2381270957878
LDL	rs28811342	17	18125845	C	T	0.197	0.0125833	0.0017499	6.44e-13	1230439	5.0095748354896e-05	61.642750358263
LDL	rs9909417	17	18679442	A	G	0.284	0.00930066	0.00155538	2.24e-09	1227157	3.51794377990413e-05	43.1721417639584
LDL	rs704	17	26694861	A	G	0.477	0.018865	0.00138898	5.13e-42	1225534	0.00017756758275795	217.65340302117
LDL	rs117765227	17	26853356	T	C	0.0294	-0.031086	0.00415197	7.04e-14	1230317	5.51502262441469e-05	67.8558928694113
LDL	rs62070652	17	29221277	T	C	0.266	0.0134136	0.00157535	1.67e-17	1227832	7.02584225709005e-05	86.271460281941
LDL	rs525767	17	37070737	A	G	0.346	0.00982307	0.00146487	2e-11	1222417	4.36695101656545e-05	53.3845955482866
LDL	rs12943633	17	37970365	T	C	0.0812	-0.0177676	0.00255433	3.5e-12	1230453	4.71047331976321e-05	57.9627963898189
LDL	rs12949918	17	40526273	C	T	0.427	0.00892227	0.00140368	2.07e-10	1226947	3.8955000615436e-05	47.7975051819499
LDL	rs72836561	17	41926126	T	C	0.0304	-0.0297626	0.0040428	1.81e-13	1225370	5.22201267136647e-05	63.9922139123891
LDL	rs12603290	17	45650196	T	C	0.495	0.0267572	0.00143656	1.98e-77	1215620	0.000357938078532408	435.271771490936
LDL	rs1292069	17	57928290	C	T	0.454	-0.00983617	0.00140296	2.37e-12	1224250	4.7965673117632e-05	58.7246961524943
LDL	rs1801689	17	64210580	C	A	0.0261	0.0908315	0.00428983	1.67e-99	1224680	0.000419428407307421	513.880278991401
LDL	rs78186330	17	66004715	A	G	0.208	0.0163391	0.00176585	2.19e-20	1195580	8.79578841596083e-05	105.169761737496
LDL	rs77542162	17	67081278	G	A	0.0196	0.18313	0.00508432	4.28e-284	1226076	0.00128886776034979	1582.28660860057
LDL	rs72631343	17	67191270	G	C	0.13	-0.0438838	0.00206407	2.62e-100	1230361	0.000435613223531928	536.194223385608
LDL	rs2125345	17	73782191	C	T	0.292	-0.0166904	0.00152666	8.05e-28	1230391	0.0001151806685235	141.733352506254
LDL	rs12451056	17	76396188	T	C	0.144	-0.018873	0.0019604	6.14e-22	1230448	8.7810840122112e-05	108.055985471757
LDL	rs62076528	17	78330756	G	A	0.403	0.00798748	0.00142685	2.17e-08	1217893	3.0699333047231e-05	37.3895892596784
LDL	rs2840354	18	9545961	T	C	0.191	0.011566	0.00177873	7.91e-11	1230421	4.1340741353528e-05	50.8685365784803
LDL	rs1010810	18	19677934	A	G	0.116	-0.0131259	0.00217345	1.55e-09	1230433	3.53344578701213e-05	43.4781486084015
LDL	rs77960347	18	47109955	G	A	0.0125	0.0699399	0.00619973	1.63e-29	1228446	0.000120761118546497	148.366188378596
LDL	rs10438978	18	47158186	T	C	0.18	-0.0177685	0.0018146	1.22e-22	1230455	9.32004236322e-05	114.68942996297
LDL	rs12968116	18	55322502	T	C	0.126	0.0142034	0.00209432	1.19e-11	1230451	4.44320764129469e-05	54.6738332621714
LDL	rs8096658	18	77156537	G	C	0.489	-0.00831808	0.00146692	1.42e-08	1193647	3.45784833531175e-05	41.275861018705
LDL	rs12454507	18	77825981	G	A	0.284	0.00992896	0.00159069	4.32e-10	1106291	4.00930301144465e-05	44.3562565690113
LDL	rs149605768	19	826805	T	G	0.0813	0.015893	0.00269973	3.94e-09	1184516	3.77316697358384e-05	44.6953774766985
LDL	rs147125514	19	1115298	A	G	0.0628	-0.0178621	0.00295801	1.56e-09	1217959	3.75566591043312e-05	45.7441138488237
LDL	rs571497	19	7827830	A	G	0.153	-0.0145349	0.00194662	8.22e-14	1231155	5.47556492884678e-05	67.4162733102627
LDL	rs144900553	19	10798974	T	C	0.0161	-0.152417	0.00589349	1.79e-147	1225041	0.000735992943931705	902.284134797784
LDL	rs1109375	19	10914719	G	C	0.176	-0.0718798	0.00182374	0	1226737	0.00149859263980271	1841.13515357841
LDL	rs138736573	19	11161985	G	A	0.00932	0.0691574	0.00744634	1.58e-20	1222451	8.83195033816104e-05	107.975624942919
LDL	rs2738447	19	11227480	A	C	0.416	-0.0560362	0.00141331	0	1216690	0.00152571538903427	1859.15614839956
LDL	rs7250652	19	11302606	G	A	0.441	0.0244106	0.00141396	8.78e-67	1219411	0.00029379019777439	358.355692667693
LDL	rs3745686	19	11564993	A	G	0.042	-0.0302116	0.00358104	3.27e-17	1218566	7.34500756103923e-05	89.5101924665067
LDL	rs58542926	19	19379549	T	C	0.0753	-0.110726	0.00262367	0	1231152	0.00170735980095929	2105.61105462214
LDL	rs147791730	19	33864260	A	G	0.028	-0.0290811	0.00417575	3.3e-12	1230422	4.60337072522947e-05	56.6434015831347
LDL	rs78242215	19	44205852	A	G	0.0556	-0.0206573	0.00303343	9.77e-12	1231218	4.4813398336918e-05	55.1774457356419
LDL	rs62119267	19	45134682	C	A	0.0208	-0.224779	0.004926	0	1229918	0.00205814612162046	2536.56747182331
LDL	rs531660643	19	45251806	T	G	0.0187	-0.392699	0.00566836	0	1090014	0.00565969453060955	6204.24910945007
LDL	rs140365836	19	45284978	A	G	0.00556	0.127729	0.0125031	1.69e-24	913282	0.000180410743482296	164.795254641923
LDL	rs10426226	19	45290267	A	G	0.0418	-0.0310859	0.00353441	1.43e-18	1224470	7.7408621781828e-05	94.7917179921975
LDL	rs113330691	19	45295886	A	G	0.0336	-0.223241	0.00382558	0	1225478	0.00323648883263183	3979.11775884856
LDL	rs148601586	19	45346666	G	C	0.0116	0.161672	0.0066786	1.86e-129	1220093	0.000599363571236434	731.716663305884
LDL	rs41289514	19	45359667	G	A	0.01	0.250855	0.00710494	4.57e-273	1221479	0.001245978974295	1523.8333238668
LDL	rs72654437	19	45416099	A	G	0.0296	0.0625866	0.00451952	1.31e-43	1217692	0.000225027301968323	274.075169729788
LDL	rs12691088	19	45418486	A	G	0.0258	0.177943	0.00472943	8.50999999999998e-310	1225744	0.00159169423493683	1954.1168314149
LDL	rs150554721	19	45490702	T	C	0.0193	-0.0384404	0.00540544	1.15e-12	1221899	5.59370136043039e-05	68.3530925799276
LDL	rs4803818	19	45914283	T	C	0.0254	0.0291478	0.00453397	1.29e-10	1228463	4.20631391918701e-05	51.6750996516933
LDL	rs2617801	19	49116076	C	G	0.401	0.0214797	0.00147658	6.11e-48	1208587	0.000221644834053012	267.936008396077
LDL	rs11667653	19	57101876	T	C	0.19	-0.010702	0.00184627	6.77e-09	1228701	3.52531970712e-05	43.3170950542749
LDL	rs144794875	19	58391476	G	A	0.142	-0.0176865	0.0022999	1.47e-14	1062765	7.6223594440422e-05	81.0137910606401
LDL	rs35081008	19	58662235	T	C	0.155	-0.0308607	0.0019307	1.65e-57	1231233	0.000249476675636156	307.24006605048
LDL	rs11673465	19	59038895	C	T	0.21	0.0163244	0.00174509	8.4e-21	1213922	8.8420066532448e-05	107.344378562164
LDL	rs62204032	20	5549506	T	A	0.0478	-0.0213519	0.0035406	1.63e-09	1220569	4.15010536566811e-05	50.6569188740825
LDL	rs73075609	20	5580789	T	C	0.0239	0.0479201	0.00475232	6.53e-24	1228539	0.000107141479880825	131.641376520243
LDL	rs969075	20	17792323	T	C	0.335	-0.0147326	0.00149902	8.52e-23	1218838	9.6706405954718e-05	117.880648822104
LDL	rs2618566	20	17844684	G	T	0.339	0.040212	0.00151102	4.87e-156	1178991	0.000724673701693152	855.00192029204
LDL	rs1044573	20	25206654	G	A	0.495	0.0102945	0.00141172	3.05e-13	1225534	5.29830662884875e-05	64.9358836968931
LDL	rs224424	20	34147998	G	A	0.215	-0.0235219	0.0016903	5.08e-44	1230402	0.000186759589607355	229.83192236839
LDL	rs1883711	20	39179822	C	G	0.0319	0.130754	0.00417363	1.9e-215	1223625	0.00105596826373687	1293.47292113322
LDL	rs35570186	20	39288654	A	G	0.0378	0.0263949	0.00393271	1.92e-11	1222564	5.06789011872981e-05	61.9612389208503
LDL	rs6093446	20	39780932	A	G	0.275	0.0242104	0.00156171	3.34e-54	1226125	0.0002337247079288	286.642235432541
LDL	rs1800961	20	43042364	T	C	0.0337	-0.0549493	0.00385026	3.29e-46	1227720	0.000196651020598726	241.479484894585
LDL	rs389877	20	44532484	G	C	0.191	-0.0122054	0.00182561	2.3e-11	1188841	4.60379437784281e-05	54.734222894679
LDL	rs1569750	20	47603241	G	A	0.306	0.0112846	0.00153404	1.89e-13	1230428	5.40857967153725e-05	66.5521700364484
LDL	rs6022851	20	52536425	T	C	0.446	0.0115658	0.0014229	4.35e-16	1193508	6.61037314207395e-05	78.9004156849286
LDL	rs117590445	20	61321110	T	C	0.0161	-0.037904	0.00587766	1.13e-10	1209485	4.55173446897613e-05	55.0549605630234
LDL	rs2257885	20	62334220	A	G	0.247	0.0123305	0.00162928	3.79e-14	1224017	5.65566009108555e-05	69.2300432798296
LDL	rs6090040	20	62692060	A	C	0.483	0.0143197	0.00147233	2.34e-22	1073397	0.000102408382943924	109.935904568308
LDL	rs73147887	20	62890294	G	C	0.212	0.0158654	0.00178832	7.21e-19	1108562	8.40996379541619e-05	93.2373358766568
LDL	rs12106385	21	16586682	A	T	0.0185	-0.0364153	0.00551245	3.95e-11	1231164	4.81570430376154e-05	59.2919767465526
LDL	rs112244600	21	33086058	T	C	0.0511	0.0301192	0.00356446	2.92e-17	1072430	8.79747835716823e-05	94.3549220500584
LDL	rs1963676	21	40709960	C	T	0.424	-0.0143783	0.00143027	8.92e-24	1220535	0.000100979546823199	123.261316094599
LDL	rs5746498	22	18435794	C	T	0.238	0.0133001	0.00169736	4.66e-15	1212286	6.41610904975471e-05	77.786454296462
LDL	rs8139142	22	21910280	C	T	0.2	-0.0135048	0.00201931	2.27e-11	1157656	5.83614793728e-05	67.566343313591
LDL	rs5752963	22	30203833	A	G	0.0365	0.0267521	0.00365516	2.5e-13	1230389	5.03373487223546e-05	61.9375372538634
LDL	rs5755688	22	35685048	A	G	0.359	0.0136768	0.00145715	6.23e-21	1218023	8.60897538466611e-05	104.868156143813
LDL	rs138352	22	41268925	T	G	0.346	0.0137988	0.00147717	9.51e-21	1227831	8.61720615195379e-05	105.813674305925
LDL	rs9615108	22	45723854	C	G	0.387	-0.00978761	0.00144914	1.44e-11	1191635	4.545218306573e-05	54.1647831708054
LDL	rs13268	22	45996298	G	A	0.0242	-0.0379802	0.00452552	4.76e-17	1224394	6.81272204176914e-05	83.4201068416641
LDL	rs41329344	22	46636930	T	C	0.107	0.0137729	0.00223775	7.52e-10	1230372	3.62506685752998e-05	44.6033519963222
stroke	rs11587860	1	156156951	C	G	0.3545	-0.0689	0.0098	2.542e-12		NA	49.4295085381091
stroke	rs2634074	4	111677041	A	T	0.7885	-0.084	0.0112	6.558e-14		NA	56.25
stroke	rs11242678	6	1337180	T	C	0.2551	0.0643	0.0105	8.708e-10		NA	37.5010430839002
stroke	rs2107595	7	19049388	A	G	0.1671	0.0803	0.0121	3.586e-11		NA	44.0413223140496
stroke	rs1537375	9	22116071	T	C	0.4979	-0.0519	0.0091	1.241e-08		NA	32.527593285835
stroke	rs475937	11	102687700	A	C	0.1318	0.0757	0.0137	2.916e-08		NA	30.5316745697693
stroke	rs10774624	12	111833788	A	G	0.5285	-0.0654	0.0094	4.042e-12		NA	48.4060660932549
stroke	rs4942561	13	47209347	T	G	0.7581	0.064	0.0107	2.048e-09		NA	35.7760503100708
T2DM	rs3768321	1	40035928	T	G	0.2	0.085	0.008	1.3e-26		NA	112.890625
T2DM	rs58432198	1	51256091	T	C	0.12	-0.065	0.01	1.8e-10		NA	42.25
T2DM	rs12140153	1	62579891	T	G	0.095	-0.064	0.011	1.2e-08		NA	33.8512396694215
T2DM	rs1127215	1	117532790	T	C	0.42	-0.047	0.0064	2.3e-13		NA	53.9306640625
T2DM	rs1493694	1	120526982	T	C	0.11	0.084	0.01	2.1e-16		NA	70.56
T2DM	rs145904381	1	151017991	T	C	0.99	0.17	0.031	2.2e-08		NA	30.0728407908429
T2DM	rs539515	1	177889025	A	C	0.8	-0.051	0.008	1.2e-10		NA	40.640625
T2DM	rs7538328	1	205125662	T	C	0.76	-0.042	0.0073	1.3e-08		NA	33.1018952899231
T2DM	rs340874	1	214159256	T	C	0.44	-0.068	0.0064	5.6e-26		NA	112.890625
T2DM	rs2494196	1	219762581	A	C	0.29	-0.055	0.007	6.6e-15		NA	61.734693877551
T2DM	rs348330	1	229672955	A	G	0.64	-0.051	0.0067	3.9e-14		NA	57.9416351080419
T2DM	rs291369	1	235691913	T	C	0.67	0.039	0.0067	6.7e-09		NA	33.8828246825574
T2DM	rs62107261	2	422144	T	C	0.95	0.11	0.016	1.8e-11		NA	47.265625
T2DM	rs7608050	2	652247	A	G	0.17	-0.054	0.0085	1.8e-10		NA	40.3598615916955
T2DM	rs11680058	2	16574669	A	G	0.86	0.058	0.01	1.3e-08		NA	33.64
T2DM	rs1260326	2	27730940	T	C	0.39	-0.067	0.0065	1.3e-24		NA	106.248520710059
T2DM	rs80147536	2	43698028	A	T	0.9	0.13	0.011	2.7e-30		NA	139.669421487603
T2DM	rs10193538	2	58981064	T	G	0.61	0.037	0.0065	1.7e-08		NA	32.4023668639053
T2DM	rs243024	2	60583665	A	G	0.46	0.058	0.0063	4.4e-20		NA	84.7568657092467
T2DM	rs12185577	2	65659488	A	G	0.6	0.051	0.0065	7.2e-15		NA	61.5621301775148
T2DM	rs11688682	2	121347612	C	G	0.27	-0.058	0.0075	1.4e-14		NA	59.8044444444445
T2DM	rs35999103	2	147861633	T	C	0.15	0.052	0.0091	8.3e-09		NA	32.6530612244898
T2DM	rs13426680	2	158339550	A	G	0.94	0.082	0.013	6.4e-10		NA	39.7869822485207
T2DM	rs1563575	2	161131694	A	G	0.73	0.048	0.0072	3.8e-11		NA	44.4444444444444
T2DM	rs10195252	2	165513091	T	C	0.59	0.06	0.0064	1.6e-20		NA	87.890625
T2DM	rs2972144	2	227101411	A	G	0.36	-0.094	0.0066	7.9e-46		NA	202.846648301194
T2DM	rs11709077	3	12336507	A	G	0.12	-0.11	0.0098	1.6e-27		NA	125.989171178676
T2DM	rs35352848	3	23455582	T	C	0.79	0.071	0.0079	9.5e-20		NA	80.7723121294664
T2DM	rs4688760	3	49980596	T	C	0.68	0.043	0.0069	4.5e-10		NA	38.8363789119933
T2DM	rs2292662	3	63897215	T	C	0.16	-0.065	0.0089	3.3e-13		NA	53.3392248453478
T2DM	rs9860730	3	64701146	A	G	0.7	0.055	0.007	7.4e-15		NA	61.734693877551
T2DM	rs2272163	3	77671721	A	C	0.38	-0.037	0.0065	1.2e-08		NA	32.4023668639053
T2DM	rs11708067	3	123065778	A	G	0.77	0.089	0.0076	1.3e-31		NA	137.136426592798
T2DM	rs4679370	3	124919777	T	C	0.46	-0.039	0.0064	1.4e-09		NA	37.1337890625
T2DM	rs62271373	3	150066540	A	T	0.055	0.088	0.014	1e-09		NA	39.5102040816327
T2DM	rs12630224	3	152095708	T	C	0.64	0.038	0.0066	1.5e-08		NA	33.1496786042241
T2DM	rs7629630	3	168218841	A	T	0.86	0.051	0.0091	2.2e-08		NA	31.4092500905688
T2DM	rs9873618	3	170733076	A	G	0.29	-0.066	0.007	8.5e-21		NA	88.8979591836735
T2DM	rs6780171	3	185503456	A	T	0.31	0.11	0.0068	2.5e-58		NA	261.678200692042
T2DM	rs9814673	3	186647652	T	C	0.28	0.041	0.007	5.9e-09		NA	34.3061224489796
T2DM	rs4686471	3	187740899	T	C	0.39	-0.06	0.0065	3.1e-20		NA	85.207100591716
T2DM	rs1531583	4	744972	T	G	0.046	0.11	0.015	1.2e-12		NA	53.7777777777778
T2DM	rs4865436	4	1788130	C	G	0.7	-0.046	0.0075	1e-09		NA	37.6177777777778
T2DM	rs10937721	4	6306763	C	G	0.59	0.087	0.0065	1.6e-40		NA	179.147928994083
T2DM	rs12640250	4	17792869	A	C	0.29	-0.039	0.0071	4.5e-08		NA	30.1725848046023
T2DM	rs10938398	4	45186139	A	G	0.43	0.044	0.0064	4.9e-12		NA	47.265625
T2DM	rs2102278	4	52818664	A	G	0.68	-0.038	0.0069	4.5e-08		NA	30.3297626549044
T2DM	rs79920718	4	83578271	A	G	0.34	0.042	0.0067	5.7e-10		NA	39.2960570282914
T2DM	rs6821438	4	95091911	A	G	0.53	0.042	0.0063	5.4e-11		NA	44.4444444444444
T2DM	rs1580278	4	104140848	A	C	0.53	-0.041	0.0064	2.9e-10		NA	41.0400390625
T2DM	rs1296328	4	137083193	A	C	0.45	0.035	0.0064	4.3e-08		NA	29.9072265625
T2DM	rs7669833	4	153513369	A	T	0.3	-0.054	0.007	1.8e-14		NA	59.5102040816327
T2DM	rs58730668	4	185717759	T	C	0.86	0.068	0.0092	1e-13		NA	54.6313799621928
T2DM	rs6885132	5	14768092	C	G	0.9	0.078	0.011	9.5e-13		NA	50.2809917355372
T2DM	rs11958808	5	44945090	C	G	0.4	0.038	0.0065	5.8e-09		NA	34.1775147928994
T2DM	rs2648731	5	52072194	A	G	0.22	0.046	0.0076	2.1e-09		NA	36.6343490304709
T2DM	rs702634	5	53271420	A	G	0.69	0.051	0.0069	2.1e-13		NA	54.6313799621928
T2DM	rs465002	5	55808475	T	C	0.74	0.073	0.0073	3.8e-23		NA	100
T2DM	rs2307111	5	75003678	T	C	0.61	0.053	0.0065	3.3e-16		NA	66.4852071005917
T2DM	rs4457053	5	76424949	A	G	0.7	-0.059	0.0069	1.4e-17		NA	73.1148918294476
T2DM	rs72764958	5	78417775	T	C	0.63	0.043	0.0066	9.6e-11		NA	42.4471992653811
T2DM	rs115505614	5	102422968	T	C	0.05	0.17	0.015	1.7e-29		NA	128.444444444444
T2DM	rs329122	5	133864599	A	G	0.43	0.037	0.0064	9.2e-09		NA	33.4228515625
T2DM	rs648795	6	7049440	A	T	0.42	0.042	0.0065	1e-10		NA	41.7514792899408
T2DM	rs9379084	6	7231843	A	G	0.11	-0.097	0.011	2.3e-20		NA	77.7603305785124
T2DM	rs7756992	6	20679709	A	G	0.73	-0.14	0.007	3e-87		NA	400
T2DM	rs2857605	6	31524851	T	C	0.78	0.061	0.0077	4.8e-15		NA	62.7593186034744
T2DM	rs601945	6	32573415	A	G	0.82	-0.08	0.0085	2.7e-21		NA	88.5813148788927
T2DM	rs6458354	6	43814190	T	C	0.71	-0.051	0.007	3.7e-13		NA	53.0816326530612
T2DM	rs3798519	6	50788778	A	C	0.82	-0.058	0.0082	1.1e-12		NA	50.029744199881
T2DM	rs4946812	6	107431688	A	G	0.33	-0.039	0.0068	1e-08		NA	32.893598615917
T2DM	rs11759026	6	126792095	A	G	0.77	-0.067	0.0075	1.3e-18		NA	79.8044444444444
T2DM	rs1573090	6	137302159	T	G	0.54	0.05	0.0064	8.4e-15		NA	61.03515625
T2DM	rs474513	6	160770312	A	G	0.52	0.039	0.0063	1e-09		NA	38.3219954648526
T2DM	rs4709746	6	164133001	T	C	0.13	-0.056	0.0096	5e-09		NA	34.0277777777778
T2DM	rs17168486	7	14898282	T	C	0.18	0.069	0.0083	6.9e-17		NA	69.1101756423284
T2DM	rs10228066	7	15063569	T	C	0.54	0.066	0.0063	1.9e-25		NA	109.750566893424
T2DM	rs1708302	7	28198677	T	C	0.49	-0.092	0.0063	4.2e-48		NA	213.252708490804
T2DM	rs58682124	7	30728557	A	G	0.75	0.044	0.0075	4.8e-09		NA	34.4177777777778
T2DM	rs878521	7	44255643	A	G	0.25	0.057	0.0074	1.6e-14		NA	59.3316289262235
T2DM	rs11496066	7	102486254	T	C	0.82	0.047	0.0083	1.2e-08		NA	32.0656118449702
T2DM	rs6976111	7	117495667	A	C	0.31	0.042	0.0073	1.5e-08		NA	33.1018952899231
T2DM	rs1562396	7	130457914	A	G	0.68	-0.058	0.0069	7.6e-17		NA	70.657424910733
T2DM	rs1117610	7	150541189	A	T	0.78	-0.044	0.0076	1.1e-08		NA	33.5180055401662
T2DM	rs6459733	7	156930550	C	G	0.33	-0.058	0.0068	3.9e-17		NA	72.7508650519031
T2DM	rs17689007	8	9974824	A	G	0.47	-0.048	0.0064	1.7e-13		NA	56.25
T2DM	rs263	8	19812812	T	C	0.17	-0.048	0.0085	1.4e-08		NA	31.8892733564014
T2DM	rs10954772	8	30863938	T	C	0.31	0.041	0.0068	2.3e-09		NA	36.3538062283737
T2DM	rs13262861	8	41508577	A	C	0.17	-0.094	0.0087	1.8e-27		NA	116.739331483683
T2DM	rs10097617	8	95961626	T	C	0.48	0.051	0.0063	1.1e-15		NA	65.5328798185941
T2DM	rs3802177	8	118185025	A	G	0.31	-0.11	0.0069	6.3e-55		NA	254.148288174753
T2DM	rs17772814	8	128711742	A	G	0.085	-0.078	0.013	5e-10		NA	36
T2DM	rs1561927	8	129568078	T	C	0.73	-0.043	0.0071	1.9e-09		NA	36.6792303114461
T2DM	rs4977213	8	145507304	T	C	0.63	-0.051	0.0067	4.4e-14		NA	57.9416351080419
T2DM	rs12719778	8	145879883	T	C	0.54	0.039	0.0064	2.1e-09		NA	37.1337890625
T2DM	rs10974438	9	4291928	A	C	0.64	-0.051	0.0066	1.6e-14		NA	59.7107438016529
T2DM	rs7022807	9	19067833	A	G	0.6	-0.04	0.0064	3.6e-10		NA	39.0625
T2DM	rs2383205	9	22060935	A	G	0.4	-0.054	0.0065	1.3e-16		NA	69.01775147929
T2DM	rs10811660	9	22134068	A	G	0.17	-0.16	0.0086	6.6e-79		NA	346.133044889129
T2DM	rs1412234	9	28410683	T	C	0.68	-0.043	0.0068	2.5e-10		NA	39.9870242214533
T2DM	rs12001437	9	34074476	T	C	0.63	-0.041	0.0065	3.7e-10		NA	39.7869822485207
T2DM	rs17791513	9	81905590	A	G	0.93	0.1	0.013	2.9e-14		NA	59.1715976331361
T2DM	rs2796441	9	84308948	A	G	0.41	-0.066	0.0065	8.5e-24		NA	103.100591715976
T2DM	rs55653563	9	97001682	A	C	0.73	0.043	0.0072	3.2e-09		NA	35.6674382716049
T2DM	rs505922	9	136149229	T	C	0.67	-0.046	0.0067	5.4e-12		NA	47.1374470928937
T2DM	rs28505901	9	139241030	A	G	0.25	-0.076	0.0081	2.6e-21		NA	88.035360463344
T2DM	rs11257655	10	12307894	T	C	0.22	0.09	0.0076	3.7e-32		NA	140.235457063712
T2DM	rs12769661	10	71335802	A	G	0.3	-0.044	0.007	3.2e-10		NA	39.5102040816327
T2DM	rs2812541	10	71466637	A	C	0.54	-0.044	0.0064	6.1e-12		NA	47.265625
T2DM	rs703972	10	80952826	C	G	0.47	-0.071	0.0064	2.5e-28		NA	123.0712890625
T2DM	rs10882101	10	94462427	T	C	0.59	0.11	0.0064	1.6e-62		NA	295.41015625
T2DM	rs147572957	10	114641576	T	C	0.0089	0.2	0.037	2.9e-08		NA	29.218407596786
T2DM	rs114322470	10	114736670	T	G	0.98	0.18	0.026	1.6e-12		NA	47.9289940828402
T2DM	rs34872471	10	114754071	T	C	0.7	-0.31	0.0069	0		NA	2018.48351186725
T2DM	rs76223293	11	2111386	C	G	0.19	0.045	0.0082	3.9e-08		NA	30.116002379536
T2DM	rs4929965	11	2197286	A	G	0.38	0.07	0.0067	4.8e-25		NA	109.155713967476
T2DM	rs231360	11	2692249	T	C	0.4	0.06	0.0066	2.9e-19		NA	82.6446280991735
T2DM	rs2237895	11	2857194	A	C	0.57	-0.093	0.0066	3.6e-44		NA	198.553719008264
T2DM	rs141521721	11	14763828	A	C	0.024	0.12	0.021	2.8e-08		NA	32.6530612244898
T2DM	rs5215	11	17408630	T	C	0.63	-0.07	0.0065	2e-26		NA	115.976331360947
T2DM	rs145678014	11	32927778	T	G	0.043	-0.11	0.016	1.1e-11		NA	47.265625
T2DM	rs2767036	11	34982148	A	C	0.71	-0.039	0.0069	2.5e-08		NA	31.9470699432892
T2DM	rs1061810	11	43877934	A	C	0.29	0.05	0.007	8.5e-13		NA	51.0204081632653
T2DM	rs12798028	11	47604639	T	C	0.41	0.037	0.0064	9.2e-09		NA	33.4228515625
T2DM	rs1783541	11	65294799	T	C	0.2	0.061	0.008	1.4e-14		NA	58.140625
T2DM	rs77464186	11	72460398	A	C	0.84	0.11	0.0088	2.3e-33		NA	156.25
T2DM	rs10830963	11	92708710	C	G	0.72	-0.099	0.0071	1.5e-43		NA	194.425709184686
T2DM	rs3020067	11	93057924	A	G	0.68	0.04	0.0068	3.9e-09		NA	34.6020761245675
T2DM	rs10893830	11	128044159	T	C	0.13	-0.054	0.0094	7.5e-09		NA	33.0013580805795
T2DM	rs10750397	11	128234144	A	G	0.28	0.045	0.007	2e-10		NA	41.3265306122449
T2DM	rs67232546	11	128398938	T	C	0.21	0.056	0.008	1.4e-12		NA	49
T2DM	rs11063018	12	4288001	T	C	0.82	-0.053	0.0084	1.6e-10		NA	39.8100907029478
T2DM	rs4238013	12	4376089	T	C	0.79	-0.058	0.008	3.3e-13		NA	52.5625
T2DM	rs76895963	12	4384844	T	G	0.98	0.48	0.027	5.3e-70		NA	316.049382716049
T2DM	rs10771260	12	26253557	A	C	0.61	-0.037	0.0065	1.7e-08		NA	32.4023668639053
T2DM	rs10842994	12	27965150	T	C	0.19	-0.074	0.0081	2.5e-20		NA	83.4628867550678
T2DM	rs2258238	12	66221060	A	T	0.9	-0.11	0.011	2e-25		NA	100
T2DM	rs7959830	12	66347368	T	G	0.4	0.037	0.0065	2e-08		NA	32.4023668639053
T2DM	rs1796330	12	71522953	C	G	0.43	-0.049	0.0064	3.2e-14		NA	58.6181640625
T2DM	rs2197973	12	95928560	T	C	0.54	0.035	0.0063	4.4e-08		NA	30.8641975308642
T2DM	rs77864822	12	97848775	A	G	0.93	0.073	0.013	2.2e-08		NA	31.5325443786982
T2DM	rs1426371	12	108629780	A	G	0.26	-0.05	0.0073	1.1e-11		NA	46.9131169074873
T2DM	rs34965774	12	118412373	A	G	0.14	0.054	0.0092	3.5e-09		NA	34.4517958412098
T2DM	rs56348580	12	121432117	C	G	0.31	-0.062	0.0069	3.8e-19		NA	80.7393404746902
T2DM	rs7299943	12	123593485	A	T	0.21	-0.048	0.008	1.8e-09		NA	36
T2DM	rs12811407	12	133069698	A	G	0.33	0.049	0.007	2.4e-12		NA	49
T2DM	rs34584161	13	26776999	A	G	0.76	0.048	0.0075	2.9e-10		NA	40.96
T2DM	rs11842871	13	31042452	T	G	0.27	-0.042	0.0073	1.5e-08		NA	33.1018952899231
T2DM	rs9563615	13	59077406	A	T	0.71	0.042	0.007	3.9e-09		NA	36
T2DM	rs1359790	13	80717156	A	G	0.28	-0.083	0.0071	5.7e-31		NA	136.659392977584
T2DM	rs7987740	13	109947213	T	C	0.61	0.036	0.0065	4.1e-08		NA	30.6745562130177
T2DM	rs17122772	14	23288935	C	G	0.77	-0.043	0.0077	2e-08		NA	31.1856974194636
T2DM	rs17522122	14	33302882	T	G	0.47	0.038	0.0064	4e-09		NA	35.25390625
T2DM	rs8018574	14	38848357	A	T	0.26	-0.041	0.0073	2.8e-08		NA	31.5443798085945
T2DM	rs17836088	14	79932041	C	G	0.22	0.058	0.0077	9.7e-14		NA	56.7380671276775
T2DM	rs8010382	14	91963722	A	G	0.58	-0.038	0.0066	8.1e-09		NA	33.1496786042241
T2DM	rs62007683	14	103894071	T	G	0.35	-0.037	0.0067	3.8e-08		NA	30.4967698819336
T2DM	rs34715063	15	38873115	T	C	0.88	-0.076	0.01	3.3e-14		NA	57.76
T2DM	rs2277536	15	41857303	T	C	0.7	-0.044	0.0069	3.1e-10		NA	40.6637261079605
T2DM	rs2440374	15	53097088	C	G	0.75	-0.041	0.0074	4.3e-08		NA	30.6975894813733
T2DM	rs8037894	15	62394264	C	G	0.43	-0.047	0.0064	3.7e-13		NA	53.9306640625
T2DM	rs7178762	15	63871292	T	C	0.54	-0.039	0.0063	7e-10		NA	38.3219954648526
T2DM	rs1005752	15	77818128	A	C	0.72	0.079	0.007	5.7e-29		NA	127.367346938776
T2DM	rs4932265	15	90423293	T	C	0.27	0.065	0.0071	7.2e-20		NA	83.8127355683396
T2DM	rs2890156	15	91513157	A	T	0.14	0.065	0.0092	1.5e-12		NA	49.9172967863894
T2DM	rs6600191	16	295795	T	C	0.82	0.061	0.0085	7e-13		NA	51.5017301038062
T2DM	rs3751837	16	3583173	T	C	0.22	0.044	0.0077	1.7e-08		NA	32.6530612244898
T2DM	rs11642430	16	30045789	C	G	0.6	-0.042	0.0065	1.2e-10		NA	41.7514792899408
T2DM	rs1421085	16	53800954	T	C	0.58	-0.12	0.0064	2.4e-78		NA	351.5625
T2DM	rs7196842	16	69923333	T	C	0.43	-0.038	0.0064	5.3e-09		NA	35.25390625
T2DM	rs72802342	16	75234872	A	C	0.077	-0.13	0.012	1.3e-27		NA	117.361111111111
T2DM	rs12920022	16	89564055	A	T	0.16	0.053	0.009	2.9e-09		NA	34.679012345679
T2DM	rs1377807	17	4045440	C	G	0.31	0.057	0.0068	5.7e-17		NA	70.2638408304498
T2DM	rs7222481	17	9785187	C	G	0.32	0.039	0.0068	1.7e-08		NA	32.893598615917
T2DM	rs4925109	17	17661802	A	G	0.32	0.048	0.0068	3.9e-12		NA	49.8269896193772
T2DM	rs2189301	17	36063685	A	G	0.13	-0.06	0.0097	6.5e-10		NA	38.2612392390265
T2DM	rs10908278	17	36099952	A	T	0.52	-0.074	0.0064	3.1e-30		NA	133.69140625
T2DM	rs75524028	17	40810228	T	C	0.048	0.091	0.015	1.6e-09		NA	36.8044444444444
T2DM	rs35895680	17	47060322	A	C	0.32	-0.055	0.0069	3.8e-15		NA	63.5370720436883
T2DM	rs60276348	17	62203304	T	C	0.14	0.052	0.0095	2.9e-08		NA	29.9612188365651
T2DM	rs61676547	17	65892507	C	G	0.19	0.055	0.0081	1e-11		NA	46.1057765584515
T2DM	rs7240767	18	7070642	T	C	0.62	-0.037	0.0065	2e-08		NA	32.4023668639053
T2DM	rs62080313	18	36278709	T	C	0.88	-0.056	0.0098	9.1e-09		NA	32.6530612244898
T2DM	rs1517037	18	56878274	T	C	0.19	-0.046	0.0082	1.8e-08		NA	31.4693634741225
T2DM	rs523288	18	57848369	A	T	0.76	-0.056	0.0074	7.5e-14		NA	57.2680788897005
T2DM	rs4804833	19	7970635	A	G	0.39	0.047	0.0066	1.1e-12		NA	50.7116620752984
T2DM	rs3111316	19	13038415	A	G	0.59	0.046	0.0065	1.6e-12		NA	50.0828402366864
T2DM	rs8107974	19	19388500	A	T	0.92	-0.093	0.012	6.3e-15		NA	60.0625
T2DM	rs10406327	19	33890838	C	G	0.52	0.035	0.0064	4.6e-08		NA	29.9072265625
T2DM	rs429358	19	45411941	T	C	0.85	0.08	0.0092	1.8e-18		NA	75.6143667296786
T2DM	rs10406431	19	46157019	A	G	0.56	0.059	0.0065	2.5e-19		NA	82.3905325443787
T2DM	rs9304665	19	47602577	A	T	0.76	0.045	0.0076	4e-09		NA	35.058864265928
T2DM	rs13041756	20	21466795	T	C	0.89	-0.058	0.01	1.3e-08		NA	33.64
T2DM	rs2268078	20	32596704	A	G	0.66	0.043	0.0067	2.9e-10		NA	41.1895745154823
T2DM	rs1800961	20	43042364	T	C	0.035	0.16	0.017	3.2e-20		NA	88.5813148788927
T2DM	rs1999536	20	45581777	C	G	0.57	-0.041	0.0064	1.3e-10		NA	41.0400390625
T2DM	rs11699802	20	48832135	T	C	0.46	-0.043	0.0064	2.5e-11		NA	45.1416015625
T2DM	rs6070625	20	57394628	C	G	0.48	-0.044	0.0063	3.2e-12		NA	48.7780297304107
T2DM	rs6518681	22	30609554	A	G	0.086	-0.083	0.012	9.6e-13		NA	47.8402777777778
T2DM	rs116989257	22	32378613	A	G	0.93	0.075	0.014	3.6e-08		NA	28.6989795918367
T2DM	rs5758223	22	41489920	A	G	0.72	0.038	0.007	4.6e-08		NA	29.469387755102
T2DM	rs1801645	22	50356850	T	C	0.72	-0.048	0.0074	1.5e-10		NA	42.0745069393718
TC	rs146421901	1	1218334	A	G	0.0257	0.0241832	0.00429009	1.73e-08	1306060	2.92875711543602e-05	38.2523869262253
TC	rs880315	1	10796866	C	T	0.348	-0.0109666	0.00141684	9.93e-15	1297861	5.45758918706035e-05	70.8356783676128
TC	rs1497406	1	16505320	A	G	0.416	-0.0136285	0.00135964	1.2e-23	1314222	9.0246899520128e-05	118.614984921968
TC	rs10753556	1	23732762	A	G	0.126	-0.0221874	0.00201652	3.7e-28	1317203	0.000108423843745452	142.831481743612
TC	rs35148262	1	25766623	A	G	0.455	-0.0260434	0.00134829	3.95e-83	1307510	0.000336382394111582	439.970669747275
TC	rs114165349	1	27021913	C	G	0.0231	0.0603377	0.00446217	1.16e-41	1314541	0.000164312115777172	216.030180737677
TC	rs11247738	1	28348723	A	G	0.274	-0.0110434	0.00150151	1.91e-13	1314484	4.85202226409789e-05	63.7820540170206
TC	rs4329504	1	39451488	G	A	0.42	-0.00962707	0.00138091	3.13e-12	1306778	4.51539282896033e-05	59.0087342707303
TC	rs140723719	1	45306595	A	G	0.0377	-0.0199368	0.00358794	2.75e-08	1315247	2.88398326539893e-05	37.9325396670923
TC	rs213499	1	54866285	C	A	0.468	-0.0109245	0.00135007	5.88e-16	1319970	5.9427932178888e-05	78.447630762783
TC	rs75374678	1	55217895	A	G	0.0203	-0.029776	0.00497499	2.16e-09	1307106	3.52656467707443e-05	46.0974936145538
TC	rs374459115	1	55489968	A	G	0.0171	0.0557966	0.00655822	1.77e-17	1140804	0.000104652814499892	119.400635699685
TC	rs11591147	1	55505647	T	G	0.0162	-0.37713	0.00525859	0	1307245	0.00453350386843193	5953.38087269718
TC	rs693668	1	55521109	G	A	0.359	-0.047829	0.001409	1.43e-252	1298929	0.00105284654281136	1369.01216103514
TC	rs11206517	1	55526428	G	T	0.0373	0.0770902	0.00357705	5.14e-103	1314917	0.000426803668907138	561.450175295754
TC	rs34721385	1	56406524	T	C	0.0748	-0.017088	0.00264	9.62e-11	1316331	4.04156612070605e-05	53.2024571135108
TC	rs7534572	1	62999675	C	G	0.329	-0.0667731	0.00148257	0	1276549	0.00196857285475772	2517.93250560305
TC	rs4970705	1	92971828	T	A	0.207	-0.0235386	0.00165769	9.21e-46	1319977	0.000181900874145248	240.148289533664
TC	rs147852973	1	93738940	G	C	0.0124	0.0374176	0.00612503	1e-09	1308951	3.4291352771661e-05	44.8871711609341
TC	rs79662819	1	95619804	T	C	0.0798	-0.01372	0.00250904	4.55e-08	1319908	2.7645429318528e-05	36.4903768222343
TC	rs35271870	1	109776285	C	T	0.0837	-0.0973047	0.00242339	0	1319879	0.00145231484392778	1919.66491711336
TC	rs35358959	1	109824250	A	G	0.0811	-0.0903524	0.00246067	3.69e-295	1319772	0.00121674196656919	1607.7757934998
TC	rs17036094	1	109834940	C	A	0.0117	-0.0898203	0.0061624	4.02e-48	1311611	0.000186575088081858	244.75923067898
TC	rs61798348	1	110109893	T	A	0.0193	-0.0288688	0.00499501	7.49e-09	1308643	3.15486618749235e-05	41.2871749797849
TC	rs561931	1	120254506	A	G	0.408	-0.00804281	0.0013844	6.26e-09	1279546	3.12483783212904e-05	39.9849244547837
TC	rs185073199	1	145536716	A	T	0.0094	0.0584487	0.00925084	2.65e-10	972679	6.36217902018117e-05	61.8873894146331
TC	rs2274127	1	150252984	T	G	0.473	-0.00928294	0.00135374	7.02e-12	1319113	4.29608473241864e-05	56.6725609758944
TC	rs12135346	1	154254317	A	G	0.289	-0.00829202	0.00151281	4.22e-08	1284155	2.82564840056258e-05	36.286674039101
TC	rs1870939	1	155055496	A	G	0.417	-0.00804679	0.00137593	4.97e-09	1289528	3.14832777258981e-05	40.5997834070231
TC	rs2022003	1	158586966	T	A	0.282	0.0123893	0.00147992	5.68e-17	1319118	6.21580078202345e-05	81.9987195208456
TC	rs115383270	1	161531340	A	G	0.0732	0.0248125	0.00264752	7.12e-21	1279209	8.353493712375e-05	106.867403475091
TC	rs6682862	1	177938437	A	G	0.164	-0.0112364	0.00181529	6.02e-10	1319980	3.46205930695117e-05	45.7000033599275
TC	rs2296288	1	183072590	T	C	0.437	-0.0122934	0.00135757	1.36e-19	1319121	7.43641902279007e-05	98.1025115630699
TC	rs4639796	1	197126649	A	G	0.161	0.0110742	0.00181161	9.78e-10	1319149	3.31316113118911e-05	43.7069137477252
TC	rs1434282	1	199010721	C	T	0.277	-0.0103963	0.00151482	6.74e-12	1309340	4.32918024911e-05	56.6860561316379
TC	rs12748401	1	210453990	T	C	0.131	0.010945	0.00199255	3.95e-08	1319933	2.727423634595e-05	36.0010919566369
TC	rs79687284	1	214150821	C	G	0.0301	0.0276624	0.00419832	4.43e-11	1306962	4.46789712229314e-05	58.3962373133289
TC	rs2642438	1	220970028	A	G	0.294	-0.0281144	0.00147034	1.69e-81	1306709	0.000328125260948782	428.904309697142
TC	rs12138866	1	224432260	G	A	0.0395	-0.0287072	0.00352541	3.86e-16	1284593	6.25325487683533e-05	80.333772830455
TC	rs10910476	1	234734956	C	T	0.455	-0.0129086	0.00136034	2.33e-21	1306629	8.2641117566462e-05	107.9900399401
TC	rs2587534	1	234849339	G	A	0.471	-0.0434346	0.00137148	4.04e-220	1306571	0.000940109037129417	1229.47316336493
TC	rs10910522	1	235011725	A	G	0.43	-0.0128158	0.00136932	8.03e-21	1286584	8.0512766469528e-05	103.594616799088
TC	rs7512010	1	235111050	A	T	0.193	-0.0202844	0.00172603	6.89e-32	1286701	0.000128169642080407	164.9368901974
TC	rs3820897	2	3642361	T	C	0.192	0.0169753	0.00170613	2.53e-23	1302122	8.94082308682445e-05	116.43065543708
TC	rs67269656	2	8720038	T	C	0.265	-0.010846	0.00151591	8.38e-13	1314222	4.58249931678e-05	60.2268824174614
TC	rs11690912	2	20496452	T	C	0.45	0.0175805	0.00135728	2.27e-38	1307532	0.00015299162022375	200.071742491205
TC	rs77370158	2	21023265	G	A	0.0768	0.0283183	0.00258245	5.59e-28	1319878	0.000113715945871326	150.10801744805
TC	rs138026891	2	21086334	T	C	0.0118	-0.0478036	0.00642803	1.03e-13	1310728	5.32939683933701e-05	69.8575130004583
TC	rs62122481	2	21216815	A	C	0.359	0.0622647	0.00140307	0	1319931	0.00178429341890353	2359.35040151423
TC	rs79722717	2	25957467	A	G	0.0294	-0.025155	0.00412178	1.04e-09	1311337	3.6113223557502e-05	47.3582442726396
TC	rs1731243	2	26930411	C	T	0.402	-0.0120022	0.00137773	3e-18	1302357	6.92594361446333e-05	90.2066206198245
TC	rs4665972	2	27598097	T	C	0.393	0.0583545	0.00140549	0	1307499	0.00162465047397162	2127.6823609226
TC	rs635304	2	31867905	T	C	0.308	-0.00868481	0.00147101	3.55e-09	1314489	3.21519597891068e-05	42.2646920599833
TC	rs72613899	2	43467835	A	G	0.166	0.0188185	0.00187728	1.19e-23	1319960	9.8055992777718e-05	129.442484726238
TC	rs6730449	2	44014719	A	T	0.25	0.0219589	0.00154669	9.51e-46	1319974	0.00018082248345375	238.72378175649
TC	rs75331444	2	44069772	A	G	0.0659	-0.103924	0.00267209	0	1319385	0.00132965965306962	1756.66611009646
TC	rs35206901	2	44097360	G	A	0.185	-0.036995	0.0017149	3.24e-103	1319378	0.00041271038403875	544.74499756866
TC	rs6756455	2	44218637	G	T	0.327	-0.0107573	0.00142954	5.27e-14	1319956	5.09330136170672e-05	67.2326594178599
TC	rs62150966	2	61199056	G	A	0.16	0.0106273	0.00184771	8.84e-09	1289635	3.0358139021952e-05	39.1520464845672
TC	rs4671050	2	62988169	T	G	0.32	-0.0184981	0.00145061	3.04e-37	1319068	0.000148916607011072	196.46008931358
TC	rs954680	2	64913045	C	G	0.299	-0.0151134	0.00148091	1.87e-24	1309254	9.57510522978329e-05	125.374261440506
TC	rs58588820	2	85874044	T	C	0.346	-0.0104703	0.00143669	3.15e-13	1313014	4.96137545441071e-05	65.1466872532179
TC	rs308915	2	86859298	A	C	0.489	0.00955046	0.00139269	7e-12	1281114	4.55835699745368e-05	58.400320592319
TC	rs2970902	2	88429183	C	G	0.341	0.0096385	0.00141943	1.12e-11	1319955	4.17530968290755e-05	55.1144266168199
TC	rs7602390	2	101683864	G	A	0.352	-0.0077335	0.00140357	3.59e-08	1319978	2.7283485094272e-05	36.014528122638
TC	rs1992172	2	109093836	G	A	0.194	0.0175561	0.00169714	4.43e-25	1319978	9.63879756486889e-05	127.242079151281
TC	rs13024140	2	111710863	C	G	0.407	-0.00822622	0.00135314	1.21e-09	1319979	3.26647800536417e-05	43.1181668263014
TC	rs55938402	2	118843158	A	G	0.0951	-0.0381466	0.00229571	5.3e-62	1319896	0.000250451000911313	330.651585417357
TC	rs17050272	2	121306440	A	G	0.42	-0.0198025	0.00139208	6.4e-46	1277791	0.000191050123845	244.168395099902
TC	rs1996591	2	134865046	C	T	0.179	0.00990873	0.00174019	1.24e-08	1319114	2.88577304823151e-05	38.0676771187541
TC	rs1375131	2	135954797	C	T	0.31	0.0218201	0.00169456	6.1e-38	1132379	0.000203682751643478	230.692651371802
TC	rs13011344	2	144186545	G	T	0.237	0.011109	0.00157335	1.66e-12	1319391	4.4632664382222e-05	58.8904748653955
TC	rs10164853	2	158481992	G	A	0.0758	-0.0268777	0.00258664	2.73e-25	1319396	0.000101216046518133	133.557362627974
TC	rs10184004	2	165508389	T	C	0.412	-0.00868315	0.00135964	1.7e-10	1319886	3.65307967705783e-05	48.218175613112
TC	rs10184673	2	169827796	G	A	0.405	0.0240345	0.00137412	1.68e-68	1319887	0.000278401882840987	367.560798752008
TC	rs12621984	2	174235962	T	C	0.495	-0.00757955	0.00135235	2.09e-08	1307471	2.87219166223399e-05	37.5540942298574
TC	rs1155061	2	191566381	G	A	0.391	-0.00907115	0.00138055	5.01e-11	1317257	3.91876068769428e-05	51.6220940430147
TC	rs12052257	2	202241594	A	G	0.393	-0.00822215	0.0014079	5.22e-09	1306571	3.2253884629496e-05	42.1432850711305
TC	rs113867238	2	203495058	A	G	0.302	-0.0266594	0.00146102	2.18e-74	1318956	0.000299635387495709	395.323745862793
TC	rs7603427	2	204317553	C	T	0.468	-0.0119314	0.00136384	2.16e-18	1306682	7.08876031693939e-05	92.6339799101915
TC	rs3845811	2	208521512	G	C	0.43	-0.00864434	0.00135713	1.9e-10	1316432	3.66300058002511e-05	48.2226049299229
TC	rs1250259	2	216300482	T	A	0.265	-0.016733	0.00153503	1.14e-27	1319146	0.00010907138572995	143.896559054447
TC	rs2382818	2	219155907	T	A	0.411	0.00884462	0.00138094	1.51e-10	1306582	3.78743745389548e-05	49.487774603618
TC	rs12614206	2	219644625	G	T	0.371	-0.00912404	0.00143396	1.98e-10	1301784	3.88533894995173e-05	50.5806083175367
TC	rs7586105	2	228571182	C	A	0.126	-0.0124351	0.00204584	1.22e-09	1317744	3.40573253067785e-05	44.8802964672615
TC	rs887829	2	234668570	T	C	0.323	-0.0184557	0.00142749	3.1e-38	1318536	0.000148964310507102	196.443771301116
TC	rs146194062	3	12271911	T	C	0.0118	-0.0673281	0.00681232	4.92e-23	1129398	0.000105718153787941	119.410283850237
TC	rs13076933	3	12327431	G	T	0.257	-0.0270727	0.00154127	4.55e-69	1319841	0.000279907847334422	369.536729548495
TC	rs434072	3	12916946	T	G	0.3	0.00946524	0.00149672	2.55e-10	1277675	3.7628122668192e-05	48.078245467955
TC	rs6792725	3	24520283	A	G	0.319	0.0176463	0.00150477	9.28e-32	1295051	0.000135292931531424	175.234683700903
TC	rs9837622	3	32514647	A	T	0.073	-0.0347677	0.00260479	1.22e-40	1319971	0.000163600457237595	215.982866835221
TC	rs146948889	3	48477252	A	G	0.0153	-0.044164	0.00555921	1.95e-15	1309433	5.87708763716707e-05	76.9609304795638
TC	rs9844432	3	58391293	G	C	0.0808	-0.0372811	0.00242726	3.07e-53	1319978	0.000206456617647108	272.574055052824
TC	rs62259831	3	58495208	C	T	0.3	-0.0095768	0.00147684	8.89e-11	1309531	3.85203412608e-05	50.4454471467533
TC	rs55921103	3	69810294	G	T	0.359	-0.0140973	0.00142386	4.13e-23	1307487	9.1464877613815e-05	119.59989469663
TC	rs793487	3	99495422	A	C	0.432	-0.00783313	0.00136408	9.33e-09	1310168	3.01115247025299e-05	39.4522838418342
TC	rs3732359	3	119536429	G	A	0.23	0.0200184	0.00158575	1.56e-36	1317350	0.000141940811117952	187.011988277917
TC	rs9289196	3	122268506	C	T	0.17	0.0170926	0.0017984	2.01e-21	1319959	8.2446698277272e-05	108.835069610119
TC	rs4303833	3	125066226	G	A	0.269	-0.0108056	0.00150919	8.08e-13	1314475	4.59195291600781e-05	60.3627530828357
TC	rs11711096	3	128072502	A	G	0.0879	0.0138181	0.00236824	5.39e-09	1319844	3.06166725277804e-05	40.410407534625
TC	rs144961914	3	129385854	T	C	0.0711	0.0161758	0.00269529	1.95e-09	1319251	3.45620979342552e-05	45.5975890860078
TC	rs77682405	3	132181820	T	G	0.0492	-0.0456329	0.00312443	2.6e-48	1304251	0.00019482308235628	254.14732410515
TC	rs112515514	3	132253816	A	G	0.0231	-0.0304617	0.00454082	1.97e-11	1312248	4.18793910859097e-05	54.9583650577843
TC	rs60614489	3	135986978	C	A	0.34	0.0085311	0.00145341	4.37e-09	1290452	3.2663514643848e-05	42.1520093049268
TC	rs6440043	3	141589505	C	T	0.486	-0.00729232	0.00133567	4.77e-08	1319391	2.65681197422549e-05	35.0546162738566
TC	rs9832727	3	142649110	G	C	0.334	-0.0159113	0.00145016	5.2e-28	1278909	0.000112632058141669	144.062153598647
TC	rs62275345	3	147052282	T	C	0.239	0.00993411	0.00155547	1.7e-10	1319949	3.58980189600833e-05	47.3851834665196
TC	rs73159032	3	155527626	A	C	0.144	0.0129678	0.00192107	1.48e-11	1319975	4.14570943684915e-05	54.7245139441997
TC	rs4679881	3	160028014	T	C	0.463	0.0159645	0.00136848	1.9e-31	1308476	0.000126734809042435	165.850221523146
TC	rs11711206	3	170732945	G	A	0.0972	0.0179384	0.00223135	9.04e-16	1319980	5.64748672616405e-05	74.5497925279231
TC	rs79287178	3	172294500	A	G	0.0293	0.0229849	0.00411256	2.28e-08	1312144	3.00516196042054e-05	39.4331772815447
TC	rs10513801	3	185822353	G	T	0.133	-0.0177327	0.00198293	3.8e-19	1319145	7.25187763965584e-05	95.6695740925368
TC	rs13067636	3	185922547	T	C	0.24	0.00946808	0.00173471	4.81e-08	1223235	3.27023277857587e-05	40.0038747441816
TC	rs13108218	4	3443931	A	G	0.387	0.0250008	0.00141082	2.9e-70	1301199	0.000296557728783656	385.994496671362
TC	rs4234798	4	7219933	T	G	0.391	-0.0105708	0.00136802	1.1e-14	1314220	5.32156973680483e-05	69.9407493093907
TC	rs11941935	4	39483162	A	G	0.343	-0.00858579	0.00141304	1.23e-09	1319148	3.32238539503717e-05	43.8285701972321
TC	rs203273	4	40418670	C	T	0.351	-0.00792786	0.0014028	1.59e-08	1309589	2.86347735782974e-05	37.5008010530289
TC	rs112575086	4	54429890	T	C	0.12	-0.0117295	0.00205573	1.16e-08	1319979	2.90571431568e-05	38.355875164839
TC	rs34707604	4	69491456	C	T	0.246	0.0388736	0.00180432	5.93e-103	1206253	0.000560590807235297	676.592513361619
TC	rs9994887	4	69537475	G	A	0.472	0.0190853	0.00146777	1.18e-38	1207592	0.000181553196120891	219.281635385381
TC	rs114483871	4	73990168	T	C	0.0199	0.0282817	0.00515964	4.22e-08	1302466	3.1200710480058e-05	40.63907014256
TC	rs150783681	4	74256021	C	G	0.0195	0.0417204	0.00486238	9.47e-18	1314943	6.65593592244703e-05	87.5274561493801
TC	rs9942164	4	76630017	G	A	0.127	-0.016573	0.00201619	2.04e-16	1310139	6.0904617641118e-05	79.7982531245764
TC	rs3775228	4	87985166	T	C	0.394	0.0132305	0.00138656	1.4e-21	1310171	8.3589428486022e-05	109.52543309846
TC	rs1229984	4	100239319	T	C	0.0289	-0.0338607	0.00420073	7.59e-16	1134613	6.43552018122818e-05	73.0228192817066
TC	rs62305782	4	100293109	T	C	0.12	0.0161396	0.00210773	1.9e-14	1317270	5.5014788539392e-05	72.4732075678969
TC	rs45440196	4	100451127	A	G	0.14	-0.0134783	0.00194686	4.42e-12	1319977	4.3744828670312e-05	57.7446062520022
TC	rs13107325	4	103188709	T	C	0.064	-0.0395317	0.00268403	4.23e-49	1319979	0.000187230587568261	247.186350132165
TC	rs12501044	4	103658651	G	T	0.244	-0.0100967	0.00162871	5.68e-10	1280619	3.76097565571459e-05	48.165505105864
TC	rs138204164	4	120123417	G	C	0.132	-0.0141096	0.00198966	1.33e-12	1319139	4.56197662680883e-05	60.1814670800491
TC	rs62335637	4	128987524	G	A	0.373	-0.00905814	0.00140077	1e-10	1319130	3.83781844472258e-05	50.6276806919678
TC	rs952225	4	151454015	C	T	0.354	-0.00791024	0.00140138	1.66e-08	1319973	2.86183833219668e-05	37.7765171547283
TC	rs41280463	4	154191226	A	G	0.166	-0.0197662	0.00179144	2.63e-28	1319970	0.000108180878797687	142.810747617004
TC	rs116692022	4	155448758	G	A	0.0131	0.0516366	0.00620742	8.91e-17	1307705	6.89429269543818e-05	90.1630885142514
TC	rs72701754	4	185251995	T	A	0.404	0.0105416	0.00138577	2.8e-14	1289068	5.35144031871181e-05	68.9872894724292
TC	rs10035977	5	13989505	A	T	0.284	-0.00856739	0.0015089	1.36e-08	1289548	2.98509689112441e-05	38.4953466790162
TC	rs7711202	5	35866930	A	G	0.318	-0.00787995	0.00143257	3.79e-08	1319979	2.69332283933084e-05	35.5521995504244
TC	rs1501720	5	39557684	C	T	0.349	0.0105008	0.00141671	1.24e-13	1317337	5.01050136772147e-05	66.0083955440352
TC	rs116734477	5	52095024	T	C	0.0376	-0.0347853	0.00353192	6.93e-23	1314943	8.75719380864316e-05	115.162016800316
TC	rs112838464	5	53308819	A	G	0.109	0.0146524	0.00213647	6.97e-12	1319960	4.17015050899709e-05	55.0465307787312
TC	rs2434583	5	57620041	C	A	0.47	0.00799278	0.00139842	1.09e-08	1277904	3.18272739063689e-05	40.6734315039418
TC	rs3010275	5	72014761	G	T	0.21	-0.0174668	0.00164324	2.17e-26	1319937	0.000101228564123232	133.628651822548
TC	rs145275181	5	74201340	G	T	0.012	0.0385646	0.00705672	4.63e-08	1296202	3.52651591843699e-05	45.712311386718
TC	rs2112653	5	74562564	C	T	0.436	0.0566719	0.00139223	0	1307342	0.00157954184359219	2068.26514514222
TC	rs113776580	5	74950420	A	G	0.0137	0.0424323	0.0057636	1.81e-13	1313623	4.86578305608806e-05	63.9210582992385
TC	rs72768400	5	75046359	T	G	0.0409	-0.027651	0.00363907	3e-14	1298947	5.99844773392184e-05	77.9212109805053
TC	rs6869845	5	122833703	C	T	0.451	-0.0148973	0.0013508	2.78e-28	1318925	0.000109899067958913	144.964339855411
TC	rs6894249	5	131797547	G	A	0.389	0.0136018	0.00137721	5.27e-23	1316407	8.79454907478399e-05	115.782066258547
TC	rs269781	5	139545447	A	G	0.213	-0.0130514	0.00162932	1.14e-15	1319976	5.71082078855935e-05	75.3856547352206
TC	rs10040099	5	141872996	G	A	0.192	0.0107246	0.00172371	4.91e-10	1313654	3.56865686358835e-05	46.8814052981536
TC	rs543486395	5	156375335	A	C	0.0235	-0.0578104	0.00582349	3.17e-23	1124371	0.000153384704589977	172.487463853817
TC	rs12657266	5	156396003	C	T	0.365	-0.0429244	0.00138598	1.35e-210	1316484	0.000854092782675128	1125.35893566659
TC	rs13357800	5	156422653	C	T	0.429	-0.0117376	0.00135783	5.41e-18	1309226	6.74966170995917e-05	88.3741559821637
TC	rs9470261	6	11855437	A	T	0.288	0.0122578	0.00173534	1.62e-12	1107189	6.16208293544141e-05	68.2299855787239
[truncated: 1,177 more rows]

## Sheet: ST5 - MR results
exposure	outcome	method	n	beta	se	cil	ciu	p	int	p_pleiotropy
BMI	activePAI	IVW-RE	534	0.395949827553375	0.0624391709008489	0.27357130136317	0.518328353743581	2.27732240173343e-10	NA	NA
BMI	activePAI	MR-Egger	534	0.620975983091801	0.163052350304129	0.301399248901098	0.940552717282503	0.000139843182465071	-0.00397333835971792	0.135262048016115
BMI	activePAI	MR-PRESSO	534	0.395949827553375	0.0624391709008489	0.27357130136317	0.518328353743581	2.27732240173343e-10	NA	0.058
BMI	activePAI	Weighted Median	534	0.468898344805224	0.114608210714841	0.244270379471559	0.693526310138889	4.28933185863483e-05	NA	NA
BMI	bNGF	IVW-RE	537	0.243591637997632	0.0738493586020241	0.0988495548562815	0.388333721138982	0.000972050899114309	NA	NA
BMI	bNGF	MR-Egger	537	0.127554558308463	0.19335525375452	-0.251414775271998	0.506523891888925	0.509452682478864	0.00204287128747076	0.516072207544186
BMI	bNGF	MR-PRESSO	537	0.243591637997632	0.0738493586020241	0.0988495548562815	0.388333721138982	0.000972050899114309	NA	0.209
BMI	bNGF	Weighted Median	537	0.149077353750698	0.131243010836446	-0.108154220711336	0.406308928212732	0.256003464531095	NA	NA
BMI	CRP	IVW-RE	512	0.427137561455934	0.0305002708076037	0.367358129154313	0.486916993757556	1.46540988746115e-44	NA	NA
BMI	CRP	MR-Egger	512	0.418937519294773	0.0776924706340293	0.26666307498214	0.571211963607406	6.95794002414374e-08	0.000147925645277336	0.908621124221121
BMI	CRP	MR-PRESSO	477	0.407033438835096	0.0112061227149395	0.385069438313815	0.428997439356378	2.59592650568637e-139	NA	<0.001
BMI	CRP	Weighted Median	512	0.377282872202541	0.0145990252744552	0.348669308455218	0.405896435949863	2.91507849879532e-147	NA	NA
BMI	CTACK	IVW-RE	537	-0.250566703450276	0.0758185705885965	-0.399168371163233	-0.101965035737319	0.000950375268504183	NA	NA
BMI	CTACK	MR-Egger	537	-0.181041384830326	0.198707539397381	-0.570501005505767	0.208418235845114	0.362245481847692	-0.00122355648966448	0.705002182706064
BMI	CTACK	MR-PRESSO	535	-0.250857936256792	0.0745577133304191	-0.396991054384414	-0.104724818129171	0.000821580522768958	NA	0.011
BMI	CTACK	Weighted Median	537	-0.238611051500894	0.133551964303284	-0.50036809159991	0.0231459885981209	0.0739935489115145	NA	NA
BMI	Eotaxin	IVW-RE	537	-0.0260547194691943	0.0502877109373154	-0.124616821771293	0.0725073828329048	0.60437939318368	NA	NA
BMI	Eotaxin	MR-Egger	537	0.0798172429256098	0.131479344550479	-0.177877537104261	0.337512022955481	0.543804068549141	-0.00186475846813456	0.383462538486656
BMI	Eotaxin	MR-PRESSO	536	-0.0197696591937129	0.0499371219697484	-0.11764641825442	0.0781070998669939	0.692343238922562	NA	0.036
BMI	Eotaxin	Weighted Median	537	-0.0681664579143949	0.0800666229478862	-0.225094155256	0.0887612394272102	0.394562900075359	NA	NA
BMI	FGFBasic	IVW-RE	537	-0.0559855125965869	0.0591144836315966	-0.171847771479199	0.0598767462860249	0.343603467480232	NA	NA
BMI	FGFBasic	MR-Egger	537	0.0430490245064151	0.154745156949569	-0.260245909896738	0.346343958909568	0.780864182956839	-0.00174366934310184	0.488583410555282
BMI	FGFBasic	MR-PRESSO	537	-0.0559855125965869	0.0591144836315966	-0.171847771479199	0.0598767462860249	0.343603467480232	NA	0.205
BMI	FGFBasic	Weighted Median	537	0.0510413723842792	0.0954551585005847	-0.136047300415429	0.238130045183988	0.592846459842716	NA	NA
BMI	GCSF	IVW-RE	537	-0.0614515791060287	0.0483336572726822	-0.156183806601588	0.0332806483895309	0.203585152240126	NA	NA
BMI	GCSF	MR-Egger	537	-0.07687295033401	0.126356964801283	-0.324528050540319	0.170782149872299	0.542935997378314	0.000271600269200019	0.894911643386916
BMI	GCSF	MR-PRESSO	537	-0.0614515791060287	0.0483336572726822	-0.156183806601588	0.0332806483895309	0.203585152240126	NA	0.913
BMI	GCSF	Weighted Median	537	0.00816521058729272	0.0841546686478217	-0.15677490909334	0.173105330267925	0.922705560874937	NA	NA
BMI	GROa	IVW-RE	537	0.101532865201579	0.072226091554715	-0.0400276729897552	0.243093403392913	0.159794109104028	NA	NA
BMI	GROa	MR-Egger	537	0.0999316526148209	0.189091536553148	-0.270680948810688	0.47054425404033	0.597164179510349	2.81807256999218e-05	0.992689357149338
BMI	GROa	MR-PRESSO	537	0.101532865201579	0.072226091554715	-0.0400276729897552	0.243093403392913	0.159794109104028	NA	0.738
BMI	GROa	Weighted Median	537	0.14483208330886	0.131321698949085	-0.112553717019958	0.402217883637677	0.270079254269031	NA	NA
BMI	HGF	IVW-RE	537	0.35031560388297	0.0474426727550612	0.25732967395273	0.443301533813209	1.53630010966483e-13	NA	NA
BMI	HGF	MR-Egger	537	0.304731947407826	0.124154403259537	0.0613937884970713	0.548070106318581	0.0141096579797328	0.000802719277826837	0.691103617320729
BMI	HGF	MR-PRESSO	537	0.35031560388297	0.0474426727550612	0.25732967395273	0.443301533813209	1.53630010966483e-13	NA	0.434
BMI	HGF	Weighted Median	537	0.404913219363432	0.084359505822882	0.239571626196986	0.570254812529878	1.58782206417841e-06	NA	NA
BMI	IFNg	IVW-RE	537	0.0106273976694935	0.0507538448512414	-0.0888483103158733	0.11010310565486	0.834143028124	NA	NA
BMI	IFNg	MR-Egger	537	0.0176868988149489	0.132924354848152	-0.242840049355651	0.278213846985548	0.894146023411201	-0.000124280404747951	0.954169214316454
BMI	IFNg	MR-PRESSO	537	0.0106273976694935	0.0507538448512414	-0.0888483103158733	0.11010310565486	0.834143028124	NA	0.128
BMI	IFNg	Weighted Median	537	0.0715809404375297	0.0790434260043345	-0.0833413277456227	0.226503208620682	0.365152875007531	NA	NA
BMI	IL10	IVW-RE	537	0.069758424352422	0.0521108672243947	-0.0323769986105402	0.171893847315384	0.18068331600833	NA	NA
BMI	IL10	MR-Egger	537	0.0893078560505275	0.136452579608792	-0.178134285580289	0.356749997681344	0.512791413606906	-0.000344198352277348	0.876787514317434
BMI	IL10	MR-PRESSO	535	0.0747108248025024	0.0507584237706018	-0.024775685787877	0.174197335392882	0.141639619046148	NA	0.018
BMI	IL10	Weighted Median	537	0.125090526558449	0.0902788276570509	-0.0518527242158692	0.302033777332767	0.165868459076604	NA	NA
BMI	IL12p70	IVW-RE	536	0.033071572158574	0.0497080566287877	-0.0643544285753274	0.130497572892475	0.505848312112328	NA	NA
BMI	IL12p70	MR-Egger	536	0.0756723930911045	0.130073503608001	-0.179266989323517	0.330611775505727	0.560724043437824	-0.000750502979258108	0.722991558705071
BMI	IL12p70	MR-PRESSO	535	0.0445191648741557	0.0482731676477323	-0.0500962437153996	0.139134573463711	0.356822920992448	NA	0.046
BMI	IL12p70	Weighted Median	536	0.145421458766446	0.0867514538650496	-0.0246082664155395	0.315451183948431	0.0936794524823334	NA	NA
BMI	IL13	IVW-RE	537	0.0473211189733425	0.0737448467239231	-0.0972161246509733	0.191858362597658	0.521076347908391	NA	NA
BMI	IL13	MR-Egger	537	0.268786616829965	0.192823152237864	-0.109139816941733	0.646713050601663	0.163331476425225	-0.00389906482513351	0.213892258721013
BMI	IL13	MR-PRESSO	537	0.0473211189733425	0.0737448467239231	-0.0972161246509733	0.191858362597658	0.521076347908391	NA	0.177
BMI	IL13	Weighted Median	537	0.178600852151784	0.115863409779234	-0.0484872581415205	0.405688962445088	0.123200587767938	NA	NA
BMI	IL16	IVW-RE	537	0.23957694910647	0.0724549978670377	0.0975677627871493	0.38158613542579	0.000944484164982742	NA	NA
BMI	IL16	MR-Egger	537	0.140394286212585	0.18975330041807	-0.231515348554442	0.512303920979612	0.459374044465234	0.00174545514374919	0.571703552732377
BMI	IL16	MR-PRESSO	537	0.23957694910647	0.0724549978670377	0.0975677627871493	0.38158613542579	0.000944484164982742	NA	0.792
BMI	IL16	Weighted Median	537	0.185751618743206	0.133990196138676	-0.0768643399700563	0.448367577456468	0.1656530165064	NA	NA
BMI	IL17	IVW-RE	536	-0.0678934170421986	0.0385410118274253	-0.143432412151684	0.00764557806728719	0.0781387876686777	NA	NA
BMI	IL17	MR-Egger	536	-0.129897873659631	0.101301386660987	-0.328444943099131	0.0686491957798697	0.199740524194683	0.00109009285908604	0.50802850325243
BMI	IL17	MR-PRESSO	536	-0.0678934170421986	0.0385410118274253	-0.143432412151684	0.00764557806728719	0.0781387876686777	NA	0.39
BMI	IL17	Weighted Median	536	-0.063235672353028	0.0699125905145664	-0.200261831827475	0.0737904871214187	0.365732349177995	NA	NA
BMI	IL18	IVW-RE	537	0.177938404147374	0.0710272307134922	0.0387275900273124	0.317149218267436	0.0122377366948254	NA	NA
BMI	IL18	MR-Egger	537	0.0993643246144067	0.185926557352231	-0.265045031565487	0.463773680794301	0.59304557607354	0.0013830765778234	0.647461599592263
BMI	IL18	MR-PRESSO	537	0.177938404147374	0.0710272307134922	0.0387275900273124	0.317149218267436	0.0122377366948254	NA	0.705
BMI	IL18	Weighted Median	537	0.156821386253877	0.131297665061943	-0.100517308521734	0.414160081029488	0.232323159463032	NA	NA
BMI	IL1a	IVW-RE	534	-0.0851176368273943	0.0606533158624493	-0.203995951460727	0.0337606778059382	0.160513448352769	NA	NA
BMI	IL1a	MR-Egger	534	-0.113636634710203	0.158404953446261	-0.424104638437618	0.196831369017213	0.473139309395731	0.000503821504277105	0.845478058713456
BMI	IL1a	MR-PRESSO	534	-0.0851176368273943	0.0606533158624493	-0.203995951460727	0.0337606778059382	0.160513448352769	NA	0.711
BMI	IL1a	Weighted Median	534	-0.00463762667866304	0.109130241623782	-0.21852896988543	0.209253716528104	0.966103096384286	NA	NA
BMI	IL1b	IVW-RE	536	-0.0128619892882795	0.0477290509608527	-0.106409210187828	0.0806852316112687	0.787560900946972	NA	NA
BMI	IL1b	MR-Egger	536	-0.0534378545633705	0.125993850733783	-0.3003812642751	0.193505555148359	0.671470529390536	0.000712222389710167	0.727818131026645
BMI	IL1b	MR-PRESSO	536	-0.0128619892882795	0.0477290509608527	-0.106409210187828	0.0806852316112687	0.787560900946972	NA	0.455
BMI	IL1b	Weighted Median	536	-0.007982414643341	0.0830359405564605	-0.170729867556412	0.15476503826973	0.923415702180064	NA	NA
BMI	IL1RA	IVW-RE	536	0.0264619671283155	0.046966605172865	-0.0655908874866126	0.118514821743244	0.573148306268378	NA	NA
BMI	IL1RA	MR-Egger	536	0.105808889353026	0.123867717375631	-0.136967375550397	0.348585154256449	0.392989329919562	-0.00139276506834914	0.48876708693977
BMI	IL1RA	MR-PRESSO	536	0.0264619671283155	0.046966605172865	-0.0655908874866126	0.118514821743244	0.573148306268378	NA	0.764
BMI	IL1RA	Weighted Median	536	0.0784030384473498	0.0773201031436817	-0.0731415789951885	0.229947655889888	0.310579951390938	NA	NA
BMI	IL2	IVW-RE	537	0.0820601950361302	0.072528769654855	-0.0600935813303871	0.224213971402647	0.257880129689422	NA	NA
BMI	IL2	MR-Egger	537	0.237638025486946	0.18987946255496	-0.134518882524598	0.609794933498489	0.210744666889635	-0.00273823787291831	0.375307018194933
BMI	IL2	MR-PRESSO	537	0.0820601950361302	0.072528769654855	-0.0600935813303871	0.224213971402647	0.257880129689422	NA	0.729
BMI	IL2	Weighted Median	537	0.12421181189348	0.11830039852012	-0.107652708562691	0.356076332349651	0.293732129531498	NA	NA
BMI	IL2ra	IVW-RE	537	0.135703394762152	0.0719299579092414	-0.00527673214944357	0.276683521673747	0.059213517699507	NA	NA
BMI	IL2ra	MR-Egger	537	0.261761043416469	0.188250005003236	-0.107202186479359	0.630724273312297	0.164378048013296	-0.00221944081102388	0.468656929272796
BMI	IL2ra	MR-PRESSO	537	0.135703394762152	0.0719299579092414	-0.00527673214944357	0.276683521673747	0.059213517699507	NA	0.253
BMI	IL2ra	Weighted Median	537	0.133109150454577	0.118122026683597	-0.0984057676261513	0.364624068535306	0.259793932721182	NA	NA
BMI	IL4	IVW-RE	536	-0.0527564749859612	0.037963419962534	-0.127163410842497	0.0216504608705743	0.164630315710088	NA	NA
BMI	IL4	MR-Egger	536	-0.0748590356488304	0.0998071921517369	-0.270477537664303	0.120759466366643	0.453232730635845	0.000388604351654438	0.810756034603767
BMI	IL4	MR-PRESSO	536	-0.0527564749859612	0.037963419962534	-0.127163410842497	0.0216504608705743	0.164630315710088	NA	0.842
BMI	IL4	Weighted Median	536	-0.0154045742485264	0.0691217150565321	-0.150880646308969	0.120071497811916	0.823643243384545	NA	NA
BMI	IL5	IVW-RE	537	0.102378787639587	0.0774836388124889	-0.0494863538240013	0.254243929103175	0.186402835126409	NA	NA
BMI	IL5	MR-Egger	537	0.201061711485306	0.203053765170545	-0.196916355174216	0.599039778144829	0.322081491064567	-0.00173686095994063	0.598999494616574
BMI	IL5	MR-PRESSO	536	0.0942953548829844	0.0767341277634423	-0.0561035355333625	0.244694245299331	0.219665251880454	NA	0.044
BMI	IL5	Weighted Median	537	0.214935444096178	0.122574577644295	-0.0253063135068487	0.455177201699205	0.0795149292418017	NA	NA
BMI	IL6	IVW-RE	536	0.080164853702987	0.0376532167865979	0.00636590489917621	0.153963802506798	0.0332517222533798	NA	NA
BMI	IL6	MR-Egger	536	0.0199148225927111	0.0989739029718114	-0.174070462641401	0.213900107826823	0.840532132276347	0.00105956337437743	0.510382907071643
BMI	IL6	MR-PRESSO	536	0.080164853702987	0.0376532167865979	0.00636590489917621	0.153963802506798	0.0332517222533798	NA	0.741
BMI	IL6	Weighted Median	536	0.123540432059198	0.0650781051559798	-0.00401031022863223	0.251091174347029	0.0576511826868971	NA	NA
BMI	IL7	IVW-RE	537	0.138745752981686	0.0774478663336159	-0.0130492757116737	0.290540781675045	0.0732174411086325	NA	NA
BMI	IL7	MR-Egger	537	0.180934578293586	0.202898644883455	-0.216739458189968	0.57860861477714	0.372527708760982	-0.00074257308164619	0.821980733579411
BMI	IL7	MR-PRESSO	537	0.138745752981686	0.0774478663336159	-0.0130492757116737	0.290540781675045	0.0732174411086325	NA	0.031
BMI	IL7	Weighted Median	537	0.254802322528033	0.122353350453318	0.0149941622517219	0.494610482804344	0.0372957264800519	NA	NA
BMI	IL8	IVW-RE	536	0.058766553452589	0.0468202674972815	-0.032999484588614	0.150532591493792	0.209423578308392	NA	NA
BMI	IL8	MR-Egger	536	0.103189125000469	0.123609764373718	-0.139081561309501	0.345459811310439	0.403831721289576	-0.000779442481682481	0.697785879013622
BMI	IL8	MR-PRESSO	536	0.058766553452589	0.0468202674972815	-0.032999484588614	0.150532591493792	0.209423578308392	NA	0.935
BMI	IL8	Weighted Median	536	0.0493436519198467	0.0862746701168978	-0.119751594287347	0.21843889812704	0.567364845433908	NA	NA
BMI	IL9	IVW-RE	537	0.118532562005059	0.0709532622040978	-0.0205332765005995	0.257598400510718	0.0948061665155309	NA	NA
BMI	IL9	MR-Egger	537	0.0959973568438992	0.185568168084938	-0.267709569279655	0.459704282967454	0.604935682991808	0.000396790472983343	0.895438837008939
BMI	IL9	MR-PRESSO	537	0.118532562005059	0.0709532622040978	-0.0205332765005995	0.257598400510718	0.0948061665155309	NA	0.943
BMI	IL9	Weighted Median	537	0.189608422620282	0.128820040375874	-0.0628742170034258	0.44209106224399	0.141051646594218	NA	NA
BMI	IP10	IVW-RE	535	0.0954859840317089	0.0493821786120607	-0.00130130752605415	0.192273275589472	0.0531608236272165	NA	NA
BMI	IP10	MR-Egger	535	0.299304484900254	0.1299912319116	0.0445263520475242	0.554082617752984	0.0213071329389725	-0.00357815864697992	0.09016791935119
BMI	IP10	MR-PRESSO	534	0.106421214376249	0.0473529570488283	0.0136094185605453	0.199233010191952	0.0250224389105004	NA	0.023
BMI	IP10	Weighted Median	535	0.0830954419056002	0.0761449382630132	-0.0661458946949316	0.232336778506132	0.275149731930814	NA	NA
BMI	MCP1	IVW-RE	536	0.137719261705475	0.0398872266562528	0.0595417340160332	0.215896789394916	0.000554973162439583	NA	NA
BMI	MCP1	MR-Egger	536	0.301038770652668	0.104646053554403	0.0959362745617882	0.506141266743547	0.00401815242463188	-0.00287177931577033	0.0914819903316659
BMI	MCP1	MR-PRESSO	535	0.135205229741711	0.0395843289596569	0.0576199449807834	0.212790514502639	0.00068478373922708	NA	0.011
BMI	MCP1	Weighted Median	536	0.209873866515083	0.0710495398987108	0.0706193271954679	0.349128405834697	0.00313776641962174	NA	NA
BMI	MCP3	IVW-RE	536	0.347199564752753	0.131239006974855	0.0899758377152375	0.604423291790269	0.00815578473277785	NA	NA
BMI	MCP3	MR-Egger	536	0.292425566366802	0.347854479752212	-0.38935668580845	0.974207818542054	0.400541303714561	0.000960576775797079	0.864968203417975
BMI	MCP3	MR-PRESSO	536	0.347199564752753	0.131239006974855	0.0899758377152375	0.604423291790269	0.00815578473277785	NA	0.338
BMI	MCP3	Weighted Median	536	0.254025058161718	0.218146862630407	-0.173534935934287	0.681585052257722	0.244234372023463	NA	NA
BMI	MCSF	IVW-RE	537	0.0480458320728176	0.0863363171278276	-0.121170240055553	0.217261904201188	0.577871694079281	NA	NA
BMI	MCSF	MR-Egger	537	-0.00076878645737671	0.229129295077819	-0.449853952612952	0.448316379698198	0.99732290149206	0.000854028804801531	0.818094804403165
BMI	MCSF	MR-PRESSO	537	0.0480458320728176	0.0863363171278276	-0.121170240055553	0.217261904201188	0.577871694079281	NA	0.534
BMI	MCSF	Weighted Median	537	0.0612404289414639	0.159790855719632	-0.25194389332785	0.374424751210778	0.701531701060361	NA	NA
BMI	MIF	IVW-RE	537	0.225070115206983	0.0759093919822385	0.0762904408334616	0.373849789580503	0.00302698898741039	NA	NA
BMI	MIF	MR-Egger	537	0.0559907874086178	0.198370030423058	-0.332807327832691	0.444788902649926	0.777748550529435	0.00297873831262597	0.356223960716022
BMI	MIF	MR-PRESSO	537	0.225070115206983	0.0759093919822385	0.0762904408334616	0.373849789580503	0.00302698898741039	NA	0.057
BMI	MIF	Weighted Median	537	0.311644381402369	0.125608377563749	0.0654564852209112	0.557832277583827	0.0130985123870379	NA	NA
BMI	MIG	IVW-RE	536	0.0736233885078018	0.0704962614326163	-0.0645467449448463	0.21179352196045	0.29631943404894	NA	NA
BMI	MIG	MR-Egger	536	0.149781843362013	0.184253378485515	-0.211348142499425	0.51091182922345	0.416268324243971	-0.00134150365940759	0.654604074299196
BMI	MIG	MR-PRESSO	536	0.0736233885078018	0.0704962614326163	-0.0645467449448463	0.21179352196045	0.29631943404894	NA	0.526
BMI	MIG	Weighted Median	536	0.156147741522515	0.130585236798276	-0.0997946195147404	0.41209010255977	0.231792803981153	NA	NA
BMI	MIP1a	IVW-RE	537	0.0182008920181222	0.0723729601678596	-0.123647503365434	0.160049287401679	0.801437255205555	NA	NA
BMI	MIP1a	MR-Egger	537	0.0947143214457873	0.18957837707397	-0.276852469866748	0.466281112758323	0.61735317571522	-0.00134686053184875	0.662309711599838
BMI	MIP1a	MR-PRESSO	537	0.0182008920181222	0.0723729601678596	-0.123647503365434	0.160049287401679	0.801437255205555	NA	0.406
BMI	MIP1a	Weighted Median	537	0.0942189178343652	0.12093156239793	-0.142802589059737	0.331240424728467	0.435915269379381	NA	NA
BMI	MIP1b	IVW-RE	537	0.0733214301469277	0.0527915937504908	-0.0301481922905042	0.17679105258436	0.164867852330368	NA	NA
BMI	MIP1b	MR-Egger	537	0.219683171090071	0.137957352395199	-0.05070827100702	0.490074613187162	0.111295046460142	-0.00257791217965169	0.250859474069756
BMI	MIP1b	MR-PRESSO	535	0.102160861997822	0.048547194691231	0.00700836040300878	0.197313363592634	0.0358137014128358	NA	<0.001
BMI	MIP1b	Weighted Median	537	0.213476198421211	0.0798794018682946	0.0569154476527519	0.37003694918967	0.00752925970414534	NA	NA
BMI	PDGFbb	IVW-RE	537	0.0398614014334893	0.0473367888416838	-0.0529169998399885	0.132639802706967	0.399742722645576	NA	NA
BMI	PDGFbb	MR-Egger	537	0.0855589090426896	0.123772868479501	-0.157031455440345	0.328149273525724	0.489403808982782	-0.000804747081414434	0.689464325089372
BMI	PDGFbb	MR-PRESSO	537	0.0398614014334893	0.0473367888416838	-0.0529169998399885	0.132639802706967	0.399742722645576	NA	0.71
BMI	PDGFbb	Weighted Median	537	0.197459177788005	0.0847145344298099	0.0314217413384995	0.363496614237511	0.0197598352373082	NA	NA
BMI	RANTES	IVW-RE	537	-0.0276570013607882	0.0741325511411135	-0.172954131679444	0.117640128957868	0.70909262630695	NA	NA
BMI	RANTES	MR-Egger	537	0.118064680866413	0.193973098078252	-0.262115605336617	0.498244967069443	0.54274635645092	-0.00256586197333281	0.416215626721449
BMI	RANTES	MR-PRESSO	537	-0.0276570013607882	0.0741325511411135	-0.172954131679444	0.117640128957868	0.70909262630695	NA	0.335
BMI	RANTES	Weighted Median	537	0.0344134487851777	0.132978624058661	-0.226219865083488	0.295046762653844	0.795797792320507	NA	NA
BMI	sCD40L	IVW-RE	534	0.0344812838605808	0.061704898137318	-0.0864580941582752	0.155420661879437	0.576291731801111	NA	NA
BMI	sCD40L	MR-Egger	534	0.344414037434701	0.160728872430439	0.029391236195308	0.659436838674094	0.0321270574397106	-0.00547400509969029	0.036870882265053
BMI	sCD40L	MR-PRESSO	534	0.0344812838605808	0.061704898137318	-0.0864580941582752	0.155420661879437	0.576291731801111	NA	0.205
BMI	sCD40L	Weighted Median	534	0.0250308987017536	0.113117421595915	-0.196675173650273	0.246736971053781	0.824872524393417	NA	NA
BMI	SCF	IVW-RE	537	0.0835060266706273	0.0474907891866887	-0.00957420973266679	0.176586263073921	0.0786858356471989	NA	NA
BMI	SCF	MR-Egger	537	-0.00895764436684026	0.124198363635101	-0.252381964030447	0.234466675296767	0.942503472850528	0.00162849470040714	0.420382074125266
BMI	SCF	MR-PRESSO	537	0.0835060266706273	0.0474907891866887	-0.00957420973266679	0.176586263073921	0.0786858356471989	NA	0.398
BMI	SCF	Weighted Median	537	0	0.0874030863174781	-0.171306901319903	0.171306901319903	1	NA	NA
BMI	SCGFb	IVW-RE	537	0.0926145130039504	0.075118223520851	-0.0546144996795472	0.239843525687448	0.217606840427875	NA	NA
BMI	SCGFb	MR-Egger	537	0.287680483197322	0.196530407001037	-0.0975120363917096	0.672873002786354	0.143249612885367	-0.00343424769875763	0.282787557552589
BMI	SCGFb	MR-PRESSO	535	0.0748285838677144	0.0739313561656002	-0.0700768742168619	0.219734041952291	0.311931430018059	NA	0.015
BMI	SCGFb	Weighted Median	537	0.127787396031602	0.133407500072739	-0.13368649937849	0.389261291441695	0.338126977801124	NA	NA
BMI	SDF1a	IVW-RE	537	0.0436367994026069	0.0514631137999494	-0.0572290501775801	0.144502648982794	0.39648040478099	NA	NA
BMI	SDF1a	MR-Egger	537	0.0428386307878732	0.134691592962084	-0.221152040438139	0.306829302013886	0.750447180909201	1.40564869105337e-05	0.994882850197681
BMI	SDF1a	MR-PRESSO	536	0.0511031094524302	0.0509193537796743	-0.0486988239557315	0.150905042860592	0.316020929312281	NA	0.038
BMI	SDF1a	Weighted Median	537	0.101253216116482	0.0892276818780622	-0.0736298267885169	0.276136259021481	0.25647019815049	NA	NA
BMI	SeSelectin	IVW-RE	534	0.223206385675934	0.0595957525916727	0.106400856964696	0.340011914387172	0.000180149274000258	NA	NA
BMI	SeSelectin	MR-Egger	534	0.34311099671799	0.155834577215323	0.0376808378299319	0.648541155606049	0.0276819675493001	-0.00211698533799322	0.404993672944391
BMI	SeSelectin	MR-PRESSO	534	0.223206385675934	0.0595957525916727	0.106400856964696	0.340011914387172	0.000180149274000258	NA	0.887
BMI	SeSelectin	Weighted Median	534	0.294846440349173	0.10218132713154	0.0945747192788495	0.495118161419497	0.00390765478498904	NA	NA
BMI	sICAM	IVW-RE	534	0.224050384934675	0.0603636838108355	0.105739738691274	0.342361031178077	0.000205892124901901	NA	NA
BMI	sICAM	MR-Egger	534	0.367228514492596	0.157798010830908	0.0579500964319555	0.676506932553236	0.0199542914026212	-0.00252832997298047	0.326074853959965
BMI	sICAM	MR-PRESSO	534	0.224050384934675	0.0603636838108355	0.105739738691274	0.342361031178077	0.000205892124901901	NA	0.323
BMI	sICAM	Weighted Median	534	0.273686711627703	0.107093132822414	0.063788028304207	0.4835853949512	0.0106006315281842	NA	NA
BMI	sVCAM	IVW-RE	534	-0.0761583019693944	0.0611540129400656	-0.196017964842019	0.0437013609032306	0.213002210953763	NA	NA
BMI	sVCAM	MR-Egger	534	-0.211104275702673	0.15990281886313	-0.52450804170084	0.102299490295494	0.186767053302116	0.00238278346894392	0.361040389726892
BMI	sVCAM	MR-PRESSO	534	-0.0761583019693944	0.0611540129400656	-0.196017964842019	0.0437013609032306	0.213002210953763	NA	0.18
BMI	sVCAM	Weighted Median	534	-0.101819517810932	0.109723207575058	-0.316873052926258	0.113234017304394	0.353424678094594	NA	NA
BMI	TNFa	IVW-RE	536	0.0345359691518356	0.0474524408811732	-0.05846910595378	0.127541044257451	0.466734957815677	NA	NA
BMI	TNFa	MR-Egger	536	0.127851849069365	0.125269167119529	-0.117671206858242	0.373374904996971	0.30743590349955	-0.00163664489899518	0.420847685657265
BMI	TNFa	MR-PRESSO	536	0.0345359691518356	0.0474524408811732	-0.05846910595378	0.127541044257451	0.466734957815677	NA	0.288
BMI	TNFa	Weighted Median	536	0.0693926498913311	0.0846819147655986	-0.0965808531911327	0.235366152973795	0.412529348541115	NA	NA
BMI	TNFb	IVW-RE	536	0.0771878146639899	0.108693465155852	-0.135847462396339	0.290223091724319	0.477615969797226	NA	NA
BMI	TNFb	MR-Egger	536	-0.228230705052455	0.284463909227257	-0.78576972203935	0.329308311934439	0.422368645864551	0.00537487478621275	0.245308173555865
BMI	TNFb	MR-PRESSO	536	0.0771878146639899	0.108693465155852	-0.135847462396339	0.290223091724319	0.477615969797226	NA	0.794
BMI	TNFb	Weighted Median	536	-0.0780712968022858	0.174987143371002	-0.421039795566996	0.264897201962425	0.65548566634126	NA	NA
BMI	TRAIL	IVW-RE	537	0.216724474824801	0.0477012899402764	0.123231664525756	0.310217285123845	5.53626954664968e-06	NA	NA
BMI	TRAIL	MR-Egger	537	0.360601419667254	0.124737672440299	0.116120074168914	0.605082765165595	0.0038416696208603	-0.00253291649983604	0.21195497372725
BMI	TRAIL	MR-PRESSO	537	0.216724474824801	0.0477012899402764	0.123231664525756	0.310217285123845	5.53626954664968e-06	NA	0.398
BMI	TRAIL	Weighted Median	537	0.239942456489209	0.086119974480634	0.0711504081576582	0.40873450482076	0.00533395410201321	NA	NA
BMI	VEGF	IVW-RE	536	0.019947924505119	0.0412368073109483	-0.0608747326617576	0.100770581671996	0.628569862168412	NA	NA
BMI	VEGF	MR-Egger	536	-0.0112518646086319	0.108639081648757	-0.224180551953703	0.201676822736439	0.917509756611758	0.000548300332976979	0.756208621549672
BMI	VEGF	MR-PRESSO	535	0.0284752867764023	0.0402909257897843	-0.0504949277715749	0.10744550132438	0.480035130774347	NA	0.047
BMI	VEGF	Weighted Median	536	0.128355961565813	0.0653018433280511	0.000366700518756063	0.256345222612871	0.0493472093450171	NA	NA
CAD	activePAI	IVW-RE	39	0.0532972456353136	0.0491486448680792	-0.043032328195071	0.149626819465698	0.278183379590692	NA	NA
CAD	activePAI	MR-Egger	39	0.0439966718122517	0.122221177471606	-0.195552434180174	0.283545777804677	0.718865196193043	0.000958448951788589	0.933590510124597
CAD	activePAI	MR-PRESSO	39	0.0532972456353136	0.0491486448680792	-0.043032328195071	0.149626819465698	0.278183379590692	NA	0.077
CAD	activePAI	Weighted Median	39	0.0228469463341889	0.0678879163434594	-0.11021092468446	0.155904817352837	0.736464282089734	NA	NA
CAD	bNGF	IVW-RE	40	0.0374541009270474	0.0588323401693241	-0.0778551669310369	0.152763368785132	0.524369553668789	NA	NA
CAD	bNGF	MR-Egger	40	-0.160729294844287	0.144940259087018	-0.444806982564747	0.123348392876173	0.267458317014204	0.020235125457619	0.135786202361571
CAD	bNGF	MR-PRESSO	40	0.0374541009270474	0.0588323401693241	-0.0778551669310369	0.152763368785132	0.524369553668789	NA	0.107
CAD	bNGF	Weighted Median	40	-0.0162555646959543	0.0813570683272983	-0.175712488505223	0.143201359113315	0.84163294021133	NA	NA
CAD	CRP	IVW-RE	38	-0.0352390558080777	0.070105458321202	-0.172643229237307	0.102165117621152	0.615204880514249	NA	NA
CAD	CRP	MR-Egger	38	-0.144864394093463	0.15949026381618	-0.457459567057967	0.167730778871042	0.363721771077396	0.0119461462562114	0.443512581206817
CAD	CRP	MR-PRESSO	30	-0.0178594129377449	0.00777151592410368	-0.0330915841489881	-0.00262724172650165	0.0289617457849587	NA	<0.001
CAD	CRP	Weighted Median	38	-0.0186043861234592	0.00896682109983385	-0.0361790325349474	-0.00102973971197104	0.038004808796102	NA	NA
CAD	CTACK	IVW-RE	40	-0.0613821890077399	0.0560124466060554	-0.171164567041581	0.0484001890261014	0.273137004478771	NA	NA
CAD	CTACK	MR-Egger	40	0.0422887674645696	0.140545579872288	-0.233175507271412	0.317753042200552	0.763498332957857	-0.0105954565181107	0.420845177946304
CAD	CTACK	MR-PRESSO	40	-0.0613821890077399	0.0560124466060554	-0.171164567041581	0.0484001890261014	0.273137004478771	NA	0.171
CAD	CTACK	Weighted Median	40	-0.0387859760564778	0.0841137040502917	-0.20364580660131	0.126073854488355	0.644717077844426	NA	NA
CAD	Eotaxin	IVW-RE	40	-0.0356901342356712	0.0464321511552853	-0.12669547822475	0.0553152097534079	0.442100331335143	NA	NA
CAD	Eotaxin	MR-Egger	40	0.0392270164345701	0.116500947886135	-0.189110645587033	0.267564678456173	0.736335638950437	-0.00765400232638841	0.482660914136328
CAD	Eotaxin	MR-PRESSO	40	-0.0356901342356712	0.0464321511552853	-0.12669547822475	0.0553152097534079	0.442100331335143	NA	0.001
CAD	Eotaxin	Weighted Median	40	-0.00851192680082665	0.0537919541568096	-0.113942219606203	0.0969183660045498	0.874269326328114	NA	NA
CAD	FGFBasic	IVW-RE	40	0.103142797453283	0.0489594289131107	0.00718408007993727	0.199101514826629	0.0351436479098025	NA	NA
CAD	FGFBasic	MR-Egger	40	0.308228338165972	0.117814738225708	0.0773156943955696	0.539140981936374	0.00889113210534442	-0.0209963807001461	0.0572505637228826
CAD	FGFBasic	MR-PRESSO	40	0.103142797453283	0.0489594289131107	0.00718408007993727	0.199101514826629	0.0351436479098025	NA	0.048
CAD	FGFBasic	Weighted Median	40	0.196777245805999	0.0634181615206188	0.0724799332598428	0.321074558352156	0.00191664683508436	NA	NA
CAD	GCSF	IVW-RE	40	0.0237163056056765	0.0415816455197616	-0.0577822220309674	0.10521483324232	0.568436843488722	NA	NA
CAD	GCSF	MR-Egger	40	0.118902240267147	0.103761739079629	-0.0844670313021668	0.322271511836461	0.251829897229033	-0.00971638889204891	0.316701230041746
CAD	GCSF	MR-PRESSO	40	0.0237163056056765	0.0415816455197616	-0.0577822220309674	0.10521483324232	0.568436843488722	NA	0.034
CAD	GCSF	Weighted Median	40	0.0470891171458934	0.0547761713120537	-0.060270205836728	0.154448440128515	0.389974137644507	NA	NA
CAD	GROa	IVW-RE	40	-0.00592196351188752	0.0590885562959961	-0.121733405750507	0.109889478726732	0.920168211834861	NA	NA
CAD	GROa	MR-Egger	40	-0.139188666330982	0.147910455064923	-0.42908783119516	0.150710498533197	0.346687785174603	0.0136086765740192	0.325652177129801
CAD	GROa	MR-PRESSO	40	-0.00592196351188752	0.0590885562959961	-0.121733405750507	0.109889478726732	0.920168211834861	NA	0.088
CAD	GROa	Weighted Median	40	0.0705311565502505	0.0823785549899575	-0.0909278443285185	0.23199015742902	0.39189630781703	NA	NA
CAD	HGF	IVW-RE	40	0.0562116166438017	0.0392141287263073	-0.020646663344878	0.133069896632481	0.15172837636804	NA	NA
CAD	HGF	MR-Egger	40	0.0785969257174682	0.0989825135587441	-0.115405235956918	0.272599087391854	0.427167142420545	-0.00228689564484829	0.80500443659598
CAD	HGF	MR-PRESSO	40	0.0562116166438017	0.0392141287263073	-0.020646663344878	0.133069896632481	0.15172837636804	NA	0.068
CAD	HGF	Weighted Median	40	0.100388616147977	0.0507711018233125	0.000879085118868528	0.199898147177085	0.0480101405481054	NA	NA
CAD	IFNg	IVW-RE	40	0.0146105348423521	0.0440705821703592	-0.0717662189892649	0.100987288673969	0.740247359103807	NA	NA
CAD	IFNg	MR-Egger	40	0.228860117538134	0.104827872337271	0.0234012631811215	0.434318971895147	0.0290211503207753	-0.021872769075255	0.0257130891089428
CAD	IFNg	MR-PRESSO	39	0.0260363948899905	0.0412147099489298	-0.0547444366099118	0.106817226389893	0.531348379569938	NA	0.01
CAD	IFNg	Weighted Median	40	0.0633670097229461	0.0569317985045244	-0.0482172649210129	0.174951284366905	0.265693960856104	NA	NA
CAD	IL10	IVW-RE	40	0.0562905145598967	0.0416293404586313	-0.0253014934391766	0.13788252255897	0.176316564813008	NA	NA
CAD	IL10	MR-Egger	40	0.209702960634548	0.101498727759488	0.0107691097493149	0.408636811519781	0.0388223502481602	-0.0156823225482187	0.0988952561122167
CAD	IL10	MR-PRESSO	40	0.0562905145598967	0.0416293404586313	-0.0253014934391766	0.13788252255897	0.176316564813008	NA	0.046
CAD	IL10	Weighted Median	40	0.034731433422511	0.0542772033100765	-0.0716499302467972	0.141112797091819	0.522244189911767	NA	NA
CAD	IL12p70	IVW-RE	40	0.0598890565201266	0.0365777000815596	-0.0118019182770379	0.131580031317291	0.101565584617469	NA	NA
CAD	IL12p70	MR-Egger	40	0.246134990619707	0.0862910635957229	0.0770076137844348	0.415262367454979	0.00433930556360895	-0.0190321443568944	0.0184623351333109
CAD	IL12p70	MR-PRESSO	40	0.0598890565201266	0.0365777000815596	-0.0118019182770379	0.131580031317291	0.101565584617469	NA	0.196
CAD	IL12p70	Weighted Median	40	0.0900902795628189	0.0514413810542765	-0.010732974618564	0.190913533744202	0.0798909380950317	NA	NA
CAD	IL13	IVW-RE	40	-0.0221749908537218	0.0550284861183281	-0.130028841769407	0.0856788600619635	0.686968131135427	NA	NA
CAD	IL13	MR-Egger	40	0.185319746495252	0.134305093806399	-0.077913400305563	0.448552893296067	0.16763544168551	-0.0212147616930557	0.0917989654105158
CAD	IL13	MR-PRESSO	40	-0.0221749908537218	0.0550284861183281	-0.130028841769407	0.0856788600619635	0.686968131135427	NA	0.197
CAD	IL13	Weighted Median	40	0.00718146592710038	0.0795708982861103	-0.148774628931176	0.163137560785376	0.928086631163255	NA	NA
CAD	IL16	IVW-RE	40	0.00623790434992923	0.053202394161566	-0.0980368720980441	0.110512680797903	0.906663083279866	NA	NA
CAD	IL16	MR-Egger	40	-0.00509068686642493	0.134519395121927	-0.268743856527515	0.258562482794665	0.969812448543946	0.00115808182018965	0.926766507397182
CAD	IL16	MR-PRESSO	40	0.00623790434992923	0.053202394161566	-0.0980368720980441	0.110512680797903	0.906663083279866	NA	0.38
CAD	IL16	Weighted Median	40	0.0236149108758454	0.0860232106261214	-0.144987483785856	0.192217305537547	0.783686651879633	NA	NA
CAD	IL17	IVW-RE	40	0.0140991133864475	0.0303152026181223	-0.0453175919291065	0.0735158187020016	0.641871357986725	NA	NA
CAD	IL17	MR-Egger	40	0.162727002905281	0.0750418068815627	0.0156477640826082	0.309806241727954	0.0301218347504246	-0.014860537895466	0.0317564708543649
CAD	IL17	MR-PRESSO	40	0.0140991133864475	0.0303152026181223	-0.0453175919291065	0.0735158187020016	0.641871357986725	NA	0.172
CAD	IL17	Weighted Median	40	0.0117538794849535	0.0420904855894384	-0.0707419563621479	0.0942497153320549	0.780050943994235	NA	NA
CAD	IL18	IVW-RE	40	0.118648715841874	0.0593450830416154	0.00233449042076912	0.234962941262979	0.0455757377903234	NA	NA
CAD	IL18	MR-Egger	40	0.0746037890528052	0.149945301996311	-0.219283602510947	0.368491180616557	0.618808286382733	0.00450360903687229	0.748544352409228
CAD	IL18	MR-PRESSO	40	0.118648715841874	0.0593450830416154	0.00233449042076912	0.234962941262979	0.0455757377903234	NA	0.064
CAD	IL18	Weighted Median	40	0.139960220188803	0.0803725884277641	-0.0175671584738754	0.297487598851481	0.081614807420243	NA	NA
CAD	IL1a	IVW-RE	39	0.0442887206531861	0.0432605408183666	-0.0405003813025374	0.129077822608909	0.305945269056914	NA	NA
CAD	IL1a	MR-Egger	39	0.251148074552592	0.106017339023329	0.0433579083300944	0.45893824077509	0.017839438599579	-0.0213331124511736	0.0325809758280382
CAD	IL1a	MR-PRESSO	39	0.0442887206531861	0.0432605408183666	-0.0405003813025374	0.129077822608909	0.305945269056914	NA	0.48
CAD	IL1a	Weighted Median	39	0.0425902958890919	0.0695449493148539	-0.0937153000746852	0.178895891852869	0.540263926144664	NA	NA
CAD	IL1b	IVW-RE	40	-0.00198074100652866	0.0358274001648416	-0.0722011549893226	0.0682396729762652	0.955910896532435	NA	NA
CAD	IL1b	MR-Egger	40	0.0519514304469637	0.0958621638542488	-0.135934958187441	0.239837819081369	0.587860635026179	-0.00532230988251742	0.543607098128071
CAD	IL1b	MR-PRESSO	40	-0.00198074100652866	0.0358274001648416	-0.0722011549893226	0.0682396729762652	0.955910896532435	NA	0.422
CAD	IL1b	Weighted Median	40	0.0309636023694826	0.0552044356840706	-0.0772351033581535	0.139162308097119	0.574872695006023	NA	NA
CAD	IL1RA	IVW-RE	40	0.00607867086465183	0.0379284626592263	-0.068259749936404	0.0804170916657077	0.872670961941748	NA	NA
CAD	IL1RA	MR-Egger	40	0.186355441632216	0.0962324578278894	-0.00225670985421653	0.374967593118649	0.0528048561144905	-0.0178563607804344	0.0428998130995775
CAD	IL1RA	MR-PRESSO	40	0.00607867086465183	0.0379284626592263	-0.068259749936404	0.0804170916657077	0.872670961941748	NA	0.162
CAD	IL1RA	Weighted Median	40	0.0511931805853233	0.0526298523760625	-0.0519594345834191	0.154345795754066	0.330701261693773	NA	NA
CAD	IL2	IVW-RE	40	0.0150348276028347	0.0515510367255485	-0.0860033477449421	0.116073002950611	0.770554720537275	NA	NA
CAD	IL2	MR-Egger	40	0.133773132084645	0.12845033067019	-0.117984889831188	0.385531154000478	0.297672037340304	-0.0121543421441063	0.3128625447935
CAD	IL2	MR-PRESSO	40	0.0150348276028347	0.0515510367255485	-0.0860033477449421	0.116073002950611	0.770554720537275	NA	0.551
CAD	IL2	Weighted Median	40	0.0437813687474214	0.0777479189047482	-0.108601752178826	0.196164489673669	0.573353518058265	NA	NA
CAD	IL2ra	IVW-RE	40	-0.021679078893013	0.0502321645287163	-0.120132312234787	0.0767741544487613	0.666048414422289	NA	NA
CAD	IL2ra	MR-Egger	40	0.000110098012593419	0.125567578677412	-0.245997833821034	0.246218029846221	0.99930041262169	-0.00222601121419992	0.849829851016398
CAD	IL2ra	MR-PRESSO	40	-0.021679078893013	0.0502321645287163	-0.120132312234787	0.0767741544487613	0.666048414422289	NA	0.969
CAD	IL2ra	Weighted Median	40	0.00242749239767118	0.075841022116726	-0.146218179501817	0.15107316429716	0.974465955400067	NA	NA
CAD	IL4	IVW-RE	40	0.0174223765614328	0.0333936785885845	-0.048028030783499	0.0828727839063647	0.601860572755396	NA	NA
CAD	IL4	MR-Egger	40	0.174236554959003	0.0829721349291899	0.0116141587773935	0.336858951140613	0.0357340665410235	-0.0156947321173127	0.0404050279611328
CAD	IL4	MR-PRESSO	38	0.0110694331980389	0.0251237125255767	-0.0381730433520914	0.0603119097481692	0.66206832217346	NA	0.033
CAD	IL4	Weighted Median	40	0.0611082677653577	0.0417244796345173	-0.0206702095919712	0.142886745122687	0.143039275427563	NA	NA
CAD	IL5	IVW-RE	40	-0.0832063388682606	0.0550627249275047	-0.191127296616806	0.0247146188802845	0.130758092872608	NA	NA
CAD	IL5	MR-Egger	40	0.0243359195154736	0.13842829683361	-0.246978556719623	0.29565039575057	0.860449793035045	-0.0109726803702161	0.396810878004733
CAD	IL5	MR-PRESSO	40	-0.0832063388682606	0.0550627249275047	-0.191127296616806	0.0247146188802845	0.130758092872608	NA	0.324
CAD	IL5	Weighted Median	40	-0.0466749822931382	0.077252279718677	-0.198086668265359	0.104736703679083	0.545717953269447	NA	NA
CAD	IL6	IVW-RE	40	0.0370962696825997	0.0370472542214475	-0.0355150143175368	0.109707553682736	0.316670651495957	NA	NA
CAD	IL6	MR-Egger	40	0.268517925738101	0.088059462567492	0.0959245506078632	0.441111300868338	0.00229390854630296	-0.0231483836603265	0.0043730314045578
CAD	IL6	MR-PRESSO	39	0.0482681018307591	0.0336567285001295	-0.0176990860294947	0.114235289691013	0.159713803567747	NA	0.001
CAD	IL6	Weighted Median	40	0.0426254594127318	0.046194866991352	-0.0479148161609363	0.1331657349864	0.356147140299062	NA	NA
CAD	IL7	IVW-RE	40	-0.0597712652319668	0.0573630989168044	-0.172200873150512	0.0526583426865783	0.29742043898529	NA	NA
CAD	IL7	MR-Egger	40	0.0320409231225949	0.144387555479413	-0.250953485432833	0.315035331678023	0.82438458902537	-0.00937821978701116	0.487820531665554
CAD	IL7	MR-PRESSO	40	-0.0597712652319668	0.0573630989168044	-0.172200873150512	0.0526583426865783	0.29742043898529	NA	0.191
CAD	IL7	Weighted Median	40	0.0224684683322829	0.078777304280395	-0.131932210856444	0.17686914752101	0.775479434036099	NA	NA
CAD	IL8	IVW-RE	40	0.00854232188182451	0.0341565520801106	-0.0584032900312589	0.075487933794908	0.802515263870083	NA	NA
CAD	IL8	MR-Egger	40	0.0553909405073513	0.0911567218605407	-0.123272951288043	0.234054832302746	0.543422844607325	-0.00463122425290046	0.578799673875996
CAD	IL8	MR-PRESSO	40	0.00854232188182451	0.0341565520801106	-0.0584032900312589	0.075487933794908	0.802515263870083	NA	0.493
CAD	IL8	Weighted Median	40	-0.0270165673036428	0.0524868977623884	-0.12988899657816	0.0758558619708744	0.606741887484033	NA	NA
CAD	IL9	IVW-RE	40	0.00853861973365649	0.0604314395901048	-0.109904825396857	0.12698206486417	0.887637429130921	NA	NA
CAD	IL9	MR-Egger	40	0.183985409526082	0.149348488787722	-0.108732249643338	0.476703068695502	0.217978921520443	-0.0179557699151068	0.199643484981332
CAD	IL9	MR-PRESSO	40	0.00853861973365649	0.0604314395901048	-0.109904825396857	0.12698206486417	0.887637429130921	NA	0.046
CAD	IL9	Weighted Median	40	0.0747453008066032	0.0791222444904398	-0.0803314487706315	0.229822050383838	0.34482163243966	NA	NA
CAD	IP10	IVW-RE	40	0.0246144417269314	0.0520190548459013	-0.077341032280849	0.126569915734712	0.636083869040705	NA	NA
CAD	IP10	MR-Egger	40	0.0382838125540193	0.139181391449026	-0.234506702004242	0.311074327112281	0.783266945884904	-0.00135240751718501	0.915494611543684
CAD	IP10	MR-PRESSO	39	-0.0119516986191606	0.0352026084716802	-0.0809488112236538	0.0570454139853327	0.736093607619221	NA	<0.001
CAD	IP10	Weighted Median	40	0.0248254731535931	0.0519289180994024	-0.0769533360773657	0.126604282384552	0.632602915362506	NA	NA
CAD	MCP1	IVW-RE	40	-0.00428560115515559	0.0332401427655284	-0.0694350838165609	0.0608638815062497	0.897414239209199	NA	NA
CAD	MCP1	MR-Egger	40	0.0377294267522393	0.0868002847493353	-0.132396005204279	0.207854858708758	0.663802420488177	-0.00420001490519072	0.599693867738335
CAD	MCP1	MR-PRESSO	40	-0.00428560115515559	0.0332401427655284	-0.0694350838165609	0.0608638815062497	0.897414239209199	NA	0.018
CAD	MCP1	Weighted Median	40	0.0397066955067623	0.0451845565272052	-0.0488534079439741	0.128266798957499	0.379527642597644	NA	NA
CAD	MCP3	IVW-RE	40	-0.0157352494805134	0.114051638980318	-0.239272354259701	0.207801855298675	0.890267281273741	NA	NA
CAD	MCP3	MR-Egger	40	0.190402965894056	0.283255989327502	-0.36476857159311	0.745574503381222	0.501460224026333	-0.0211954183300038	0.426164703138763
CAD	MCP3	MR-PRESSO	40	-0.0157352494805134	0.114051638980318	-0.239272354259701	0.207801855298675	0.890267281273741	NA	0.019
CAD	MCP3	Weighted Median	40	0.0648211632325764	0.143065999389359	-0.215583042982797	0.345225369447949	0.650487008118139	NA	NA
CAD	MCSF	IVW-RE	40	-0.0538057825355938	0.0753093692325252	-0.201409433929772	0.0937978688585843	0.474940725041431	NA	NA
CAD	MCSF	MR-Egger	40	-0.231848186204186	0.186946601162255	-0.598256791514379	0.134560419106006	0.214907339873562	0.0182630335227989	0.298190421141588
CAD	MCSF	MR-PRESSO	39	-0.0810308466027866	0.0703066892122714	-0.218831957458838	0.0567702642532653	0.256300737222983	NA	0.02
CAD	MCSF	Weighted Median	40	-0.100544929591214	0.0989433344536619	-0.294470301630692	0.0933804424482647	0.30954034875759	NA	NA
CAD	MIF	IVW-RE	40	-0.0093370322505925	0.0624016962754044	-0.131642109524592	0.112968045023407	0.881058226820613	NA	NA
CAD	MIF	MR-Egger	40	-0.140820134238357	0.157186236511817	-0.448899496666913	0.167259228190199	0.37031641968774	0.0133694544531836	0.36190280210631
CAD	MIF	MR-PRESSO	39	-0.0300184286763821	0.0577754435877683	-0.143258298108408	0.0832214407556438	0.606376291123205	NA	0.031
CAD	MIF	Weighted Median	40	-0.00257673858292533	0.0822601903696972	-0.16380374906894	0.15865027190309	0.975010952987586	NA	NA
CAD	MIG	IVW-RE	40	-0.0124704327619609	0.0593363289085393	-0.128767500397521	0.103826634873599	0.833538721867067	NA	NA
CAD	MIG	MR-Egger	40	-0.184999390129759	0.146883552688981	-0.472885863321453	0.102887083061935	0.207850882553742	0.0176452420722102	0.199841420184096
CAD	MIG	MR-PRESSO	40	-0.0124704327619609	0.0593363289085393	-0.128767500397521	0.103826634873599	0.833538721867067	NA	0.05
CAD	MIG	Weighted Median	40	0.0180352277886496	0.0769906790439926	-0.132863730282859	0.168934185860158	0.814789274648684	NA	NA
CAD	MIP1a	IVW-RE	40	0.0207745730062487	0.0601323465668322	-0.0970826605706231	0.138631806583121	0.729732919509909	NA	NA
CAD	MIP1a	MR-Egger	40	0.127658446883734	0.151089566756961	-0.168471662399671	0.423788556167138	0.398156060835152	-0.010924448961843	0.440182614509361
CAD	MIP1a	MR-PRESSO	40	0.0207745730062487	0.0601323465668322	-0.0970826605706231	0.138631806583121	0.729732919509909	NA	0.061
CAD	MIP1a	Weighted Median	40	0.0912104111336782	0.0779411090968315	-0.0615513556112187	0.243972177878575	0.241901263499219	NA	NA
CAD	MIP1b	IVW-RE	40	0.0238584762741003	0.0390840324268762	-0.0527448196531727	0.100461772201373	0.541570047025337	NA	NA
CAD	MIP1b	MR-Egger	40	0.0167767134750392	0.0988414103027717	-0.17694889089954	0.210502317849618	0.86521960809903	0.00072311303146023	0.937673019790044
CAD	MIP1b	MR-PRESSO	40	0.0238584762741003	0.0390840324268762	-0.0527448196531727	0.100461772201373	0.541570047025337	NA	0.077
CAD	MIP1b	Weighted Median	40	0.0430218034560205	0.0501612468720073	-0.0552924338327361	0.141336040744777	0.391074634610973	NA	NA
CAD	PDGFbb	IVW-RE	40	-0.000946867440336262	0.0365358159356119	-0.0725557508199202	0.0706620159392477	0.979324223902562	NA	NA
CAD	PDGFbb	MR-Egger	40	0.0728730025305882	0.0914007335893523	-0.106269143465083	0.252015148526259	0.425281917450685	-0.00754076913730971	0.377999291301863
CAD	PDGFbb	MR-PRESSO	40	-0.000946867440336262	0.0365358159356119	-0.0725557508199202	0.0706620159392477	0.979324223902562	NA	0.221
CAD	PDGFbb	Weighted Median	40	0.029242147787493	0.0523376495717496	-0.0733377604086144	0.1318220559836	0.576352094467217	NA	NA
CAD	RANTES	IVW-RE	40	-0.0288277637885686	0.0520622420383261	-0.130867883138095	0.0732123555609576	0.579772337686843	NA	NA
CAD	RANTES	MR-Egger	40	-0.0207506396532078	0.129781563192366	-0.275117829367553	0.233616550061138	0.872968542322459	-0.000826651301445508	0.94583122250345
CAD	RANTES	MR-PRESSO	40	-0.0288277637885686	0.0520622420383261	-0.130867883138095	0.0732123555609576	0.579772337686843	NA	0.559
CAD	RANTES	Weighted Median	40	-0.0455206837431583	0.0769252063007786	-0.196291317595998	0.105249950109681	0.554016329816308	NA	NA
CAD	sCD40L	IVW-RE	39	0.0414939143483534	0.0468496991455601	-0.0503298086634814	0.133317637360188	0.375789150908005	NA	NA
CAD	sCD40L	MR-Egger	39	-0.0556741433922928	0.115163649557173	-0.281390748852544	0.170042462067959	0.628786874311331	0.0100130002657677	0.355499700306393
CAD	sCD40L	MR-PRESSO	39	0.0414939143483534	0.0468496991455601	-0.0503298086634814	0.133317637360188	0.375789150908005	NA	0.231
CAD	sCD40L	Weighted Median	39	0.110303746442414	0.0641794681753889	-0.0154856997282825	0.236093192613111	0.0856732856976724	NA	NA
CAD	SCF	IVW-RE	40	7.71153475707606e-06	0.0490957912653256	-0.0962182711377771	0.0962336942072913	0.999874675316582	NA	NA
CAD	SCF	MR-Egger	40	0.0166471736283546	0.124067787750785	-0.226521222004744	0.259815569261453	0.893261783779481	-0.0016989292926775	0.883616130073905
CAD	SCF	MR-PRESSO	39	0.0259509726356017	0.0406287834330256	-0.0536814428931284	0.105583388164332	0.526827566562042	NA	<0.001
CAD	SCF	Weighted Median	40	0.000478017917388628	0.0564617788495579	-0.11018503513081	0.111141070965588	0.993245013395032	NA	NA
CAD	SCGFb	IVW-RE	40	-0.0202415847369975	0.0576047763928791	-0.133144871804524	0.0926617023305287	0.72529783627521	NA	NA
CAD	SCGFb	MR-Egger	40	0.0375442775183152	0.145209317371974	-0.2470607547504	0.322149309787031	0.79598029496381	-0.00591140111233847	0.664010555230477
CAD	SCGFb	MR-PRESSO	40	-0.0202415847369975	0.0576047763928791	-0.133144871804524	0.0926617023305287	0.72529783627521	NA	0.092
CAD	SCGFb	Weighted Median	40	0.0346203815147084	0.0785248153412476	-0.119285428446795	0.188526191476212	0.659296545687297	NA	NA
CAD	SDF1a	IVW-RE	39	0.0452999574494118	0.0360071292423409	-0.0252727190522553	0.115872633951079	0.208361737994576	NA	NA
CAD	SDF1a	MR-Egger	39	0.159579530439932	0.0878506008143625	-0.0126044831764239	0.331763544056287	0.0692956024233358	-0.0117566280455345	0.154918004161096
CAD	SDF1a	MR-PRESSO	39	0.0452999574494118	0.0360071292423409	-0.0252727190522553	0.115872633951079	0.208361737994576	NA	0.391
CAD	SDF1a	Weighted Median	39	0.0950769363250686	0.0541442078241589	-0.0110437609817347	0.201197633631872	0.0790893313543286	NA	NA
CAD	SeSelectin	IVW-RE	39	-0.1774066696443	0.257990032055979	-0.683057840844353	0.328244501555752	0.49167364302944	NA	NA
CAD	SeSelectin	MR-Egger	39	0.119034740514542	0.639501604612049	-1.13436537258065	1.37243485360973	0.852337535147862	-0.0305442183353282	0.611741377513278
CAD	SeSelectin	MR-PRESSO	37	0.0160806379264148	0.0340282298120464	-0.0506146925051961	0.0827759683580258	0.639374185426081	NA	<0.001
CAD	SeSelectin	Weighted Median	39	0.0419991029683212	0.0632415167901661	-0.0819519922680895	0.165950198204732	0.506622144188803	NA	NA
CAD	sICAM	IVW-RE	39	-0.086447787729548	0.108947689794235	-0.299981335925091	0.127085760465995	0.427498351762665	NA	NA
CAD	sICAM	MR-Egger	39	-0.0574089486725634	0.271083660871319	-0.588723160777617	0.473905263432491	0.832281979256529	-0.00299148364065477	0.906633177505951
CAD	sICAM	MR-PRESSO	38	0.00109797678233003	0.0453234178755853	-0.0877359222538171	0.0899318758184772	0.980803021658871	NA	<0.001
CAD	sICAM	Weighted Median	39	-0.0258867545524878	0.0680639901263822	-0.159289723844287	0.107516214739311	0.703700717714343	NA	NA
CAD	sVCAM	IVW-RE	39	-0.0791416504673711	0.0607338784142566	-0.198177864800749	0.0398945638660064	0.192544369715151	NA	NA
CAD	sVCAM	MR-Egger	39	-0.0394804879864025	0.150938640212197	-0.335314786677757	0.256353810704952	0.793655693795481	-0.00408610988452095	0.773566916401738
CAD	sVCAM	MR-PRESSO	38	-0.0434309553639131	0.0462805095788963	-0.13414075413855	0.0472788434107236	0.354110105881926	NA	<0.001
CAD	sVCAM	Weighted Median	39	-0.115958511049193	0.0677166047431067	-0.248680617501016	0.0167635954026307	0.0868213552625456	NA	NA
CAD	TNFa	IVW-RE	40	-0.0198062368481847	0.0395561231891397	-0.0973348136669282	0.0577223399705588	0.616573624728212	NA	NA
CAD	TNFa	MR-Egger	40	0.178783966612579	0.100017122992917	-0.0172459922908523	0.37481392551601	0.0738512886476208	-0.0196426296976092	0.0319471109778695
CAD	TNFa	MR-PRESSO	40	-0.0198062368481847	0.0395561231891397	-0.0973348136669282	0.0577223399705588	0.616573624728212	NA	0.058
CAD	TNFa	Weighted Median	40	-0.0244692431145637	0.0549084138342131	-0.132087756677842	0.0831492704487148	0.655859185787195	NA	NA
CAD	TNFb	IVW-RE	39	-0.0844616993502399	0.0773273116735601	-0.236020445251721	0.0670970465512416	0.274717871162604	NA	NA
CAD	TNFb	MR-Egger	39	0.0143314044571417	0.195032552229108	-0.367925373724836	0.396588182639119	0.941422475653596	-0.0100412651191879	0.581106734056995
CAD	TNFb	MR-PRESSO	39	-0.0844616993502399	0.0773273116735601	-0.236020445251721	0.0670970465512416	0.274717871162604	NA	0.934
CAD	TNFb	Weighted Median	39	-0.0985575236088022	0.113174819809694	-0.320376094392613	0.123261047175009	0.383839767237304	NA	NA
CAD	TRAIL	IVW-RE	40	-0.000330530803398431	0.0376562777945027	-0.0741354790724591	0.0734744174656623	0.99299659833908	NA	NA
CAD	TRAIL	MR-Egger	40	0.036178727216696	0.0949114124572037	-0.149844222921249	0.222201677354642	0.703066600496332	-0.00373076366149014	0.674552785022689
CAD	TRAIL	MR-PRESSO	40	-0.000330530803398431	0.0376562777945027	-0.0741354790724591	0.0734744174656623	0.99299659833908	NA	0.148
CAD	TRAIL	Weighted Median	40	0.0367784827858062	0.0512812301820814	-0.0637308814539818	0.137287847025594	0.473255698015479	NA	NA
CAD	VEGF	IVW-RE	40	-0.00216767957801372	0.0328610731662058	-0.0665741994771128	0.0622388403210853	0.947405717666487	NA	NA
CAD	VEGF	MR-Egger	40	0.161937409546468	0.0814155157978555	0.00236593079991895	0.321508888293016	0.046698561227273	-0.016383862915356	0.0289321918891912
CAD	VEGF	MR-PRESSO	40	-0.00216767957801372	0.0328610731662058	-0.0665741994771128	0.0622388403210853	0.947405717666487	NA	0.067
CAD	VEGF	Weighted Median	40	-0.0182338265256662	0.0448329905723076	-0.106104873366613	0.0696372203152804	0.684224256582271	NA	NA
FI	activePAI	IVW-RE	1	0.703464285714286	0.861017857142857	-0.984099704331567	2.39102827576014	0.413920001231692	NA	NA
FI	activePAI	MR-Egger	NA	NA	NA	NA	NA	NA	NA	NA
FI	activePAI	Weighted Median	NA	NA	NA	NA	NA	NA	NA	NA
FI	bNGF	IVW-RE	1	0.867857142857143	1.05357142857143	-1.19710491228327	2.93281919799756	0.410093663690892	NA	NA
FI	bNGF	MR-Egger	NA	NA	NA	NA	NA	NA	NA	NA
FI	bNGF	Weighted Median	NA	NA	NA	NA	NA	NA	NA	NA
FI	CRP	IVW-RE	1	-0.200588461538462	0.125903846153846	-0.447355465515072	0.0461785424381486	0.111118085317334	NA	NA
FI	CRP	MR-Egger	NA	NA	NA	NA	NA	NA	NA	NA
FI	CRP	Weighted Median	NA	NA	NA	NA	NA	NA	NA	NA
FI	CTACK	IVW-RE	1	0.267857142857143	1.03928571428571	-1.76910542678984	2.30481971250413	0.79661377959839	NA	NA
FI	CTACK	MR-Egger	NA	NA	NA	NA	NA	NA	NA	NA
FI	CTACK	Weighted Median	NA	NA	NA	NA	NA	NA	NA	NA
FI	Eotaxin	IVW-RE	1	0.25	0.703571428571429	-1.12897466055139	1.62897466055139	0.722342421226462	NA	NA
FI	Eotaxin	MR-Egger	NA	NA	NA	NA	NA	NA	NA	NA
FI	Eotaxin	Weighted Median	NA	NA	NA	NA	NA	NA	NA	NA
FI	FGFBasic	IVW-RE	1	0.0535714285714286	0.846428571428571	-1.60539808691426	1.71254094405712	0.949534671480319	NA	NA
FI	FGFBasic	MR-Egger	NA	NA	NA	NA	NA	NA	NA	NA
FI	FGFBasic	Weighted Median	NA	NA	NA	NA	NA	NA	NA	NA
FI	GCSF	IVW-RE	1	0.832142857142857	0.714285714285714	-0.56783141752861	2.23211713181432	0.244018992838299	NA	NA
FI	GCSF	MR-Egger	NA	NA	NA	NA	NA	NA	NA	NA
FI	GCSF	Weighted Median	NA	NA	NA	NA	NA	NA	NA	NA
FI	GROa	IVW-RE	1	2.71428571428571	1.05714285714286	0.642323787771943	4.78624764079948	0.0102414827887461	NA	NA
FI	GROa	MR-Egger	NA	NA	NA	NA	NA	NA	NA	NA
FI	GROa	Weighted Median	NA	NA	NA	NA	NA	NA	NA	NA
FI	HGF	IVW-RE	1	-0.310714285714286	0.7	-1.68268907489232	1.06126050346375	0.657131115753326	NA	NA
FI	HGF	MR-Egger	NA	NA	NA	NA	NA	NA	NA	NA
FI	HGF	Weighted Median	NA	NA	NA	NA	NA	NA	NA	NA
FI	IFNg	IVW-RE	1	-0.321428571428571	0.725	-1.74240246022011	1.09954531736297	0.657512773577584	NA	NA
FI	IFNg	MR-Egger	NA	NA	NA	NA	NA	NA	NA	NA
FI	IFNg	Weighted Median	NA	NA	NA	NA	NA	NA	NA	NA
FI	IL10	IVW-RE	1	-0.171428571428571	0.725	-1.59240246022011	1.24954531736297	0.81308101713275	NA	NA
FI	IL10	MR-Egger	NA	NA	NA	NA	NA	NA	NA	NA
FI	IL10	Weighted Median	NA	NA	NA	NA	NA	NA	NA	NA
FI	IL12p70	IVW-RE	1	-0.0964285714285714	0.7	-1.46840336060661	1.27554621774947	0.890433969345353	NA	NA
FI	IL12p70	MR-Egger	NA	NA	NA	NA	NA	NA	NA	NA
FI	IL12p70	Weighted Median	NA	NA	NA	NA	NA	NA	NA	NA
FI	IL13	IVW-RE	1	0.232142857142857	2022-05-01	-1.8258193266242	2.29010504090991	0.825023574702067	NA	NA
FI	IL13	MR-Egger	NA	NA	NA	NA	NA	NA	NA	NA
FI	IL13	Weighted Median	NA	NA	NA	NA	NA	NA	NA	NA
FI	IL16	IVW-RE	1	0.025	1.06071428571429	-2.05396179788713	2.10396179788713	0.981196380895393	NA	NA
FI	IL16	MR-Egger	NA	NA	NA	NA	NA	NA	NA	NA
FI	IL16	Weighted Median	NA	NA	NA	NA	NA	NA	NA	NA
FI	IL17	IVW-RE	1	-0.0928571428571428	0.557142857142857	-1.18483707710089	0.999122791386601	0.867632334778193	NA	NA
FI	IL17	MR-Egger	NA	NA	NA	NA	NA	NA	NA	NA
FI	IL17	Weighted Median	NA	NA	NA	NA	NA	NA	NA	NA
FI	IL18	IVW-RE	1	-1.07857142857143	1.04285714285714	-3.12253386959177	0.965391012448913	0.301020905502832	NA	NA
FI	IL18	MR-Egger	NA	NA	NA	NA	NA	NA	NA	NA
FI	IL18	Weighted Median	NA	NA	NA	NA	NA	NA	NA	NA
FI	IL1a	IVW-RE	1	1.84433928571429	0.878292857142857	0.122916917835503	3.56576165359307	0.0357364251290248	NA	NA
FI	IL1a	MR-Egger	NA	NA	NA	NA	NA	NA	NA	NA
FI	IL1a	Weighted Median	NA	NA	NA	NA	NA	NA	NA	NA
FI	IL1b	IVW-RE	1	0.860714285714286	0.689285714285714	-0.49026088934368	2.21168946077225	0.211773114650136	NA	NA
FI	IL1b	MR-Egger	NA	NA	NA	NA	NA	NA	NA	NA
FI	IL1b	Weighted Median	NA	NA	NA	NA	NA	NA	NA	NA
FI	IL1RA	IVW-RE	1	1.82142857142857	0.682142857142857	0.484453139117321	3.15840400373982	0.0075815772483445	NA	NA
FI	IL1RA	MR-Egger	NA	NA	NA	NA	NA	NA	NA	NA
FI	IL1RA	Weighted Median	NA	NA	NA	NA	NA	NA	NA	NA
FI	IL2	IVW-RE	1	-0.771428571428571	1.06071428571429	-2.8503903693157	1.30753322645856	0.467058901715173	NA	NA
FI	IL2	MR-Egger	NA	NA	NA	NA	NA	NA	NA	NA
FI	IL2	Weighted Median	NA	NA	NA	NA	NA	NA	NA	NA
FI	IL2ra	IVW-RE	1	0.589285714285714	1.03571428571429	-1.44067698398791	2.61924841255934	0.569379541379991	NA	NA
FI	IL2ra	MR-Egger	NA	NA	NA	NA	NA	NA	NA	NA
FI	IL2ra	Weighted Median	NA	NA	NA	NA	NA	NA	NA	NA
FI	IL4	IVW-RE	1	0.553571428571429	0.553571428571429	-0.531408634298958	1.63855149144182	0.317310507862914	NA	NA
FI	IL4	MR-Egger	NA	NA	NA	NA	NA	NA	NA	NA
FI	IL4	Weighted Median	NA	NA	NA	NA	NA	NA	NA	NA
FI	IL5	IVW-RE	1	-0.235714285714286	1.08214285714286	-2.35667531184156	1.88524674041299	0.827567972308404	NA	NA
FI	IL5	MR-Egger	NA	NA	NA	NA	NA	NA	NA	NA
FI	IL5	Weighted Median	NA	NA	NA	NA	NA	NA	NA	NA
FI	IL6	IVW-RE	1	0.353571428571429	0.55	-0.724408762925601	1.43155162006846	0.520316800507367	NA	NA
FI	IL6	MR-Egger	NA	NA	NA	NA	NA	NA	NA	NA
FI	IL6	Weighted Median	NA	NA	NA	NA	NA	NA	NA	NA
FI	IL7	IVW-RE	1	0.321428571428571	1.07142857142857	-1.77853284057863	2.42138998343577	0.764177155622095	NA	NA
FI	IL7	MR-Egger	NA	NA	NA	NA	NA	NA	NA	NA
FI	IL7	Weighted Median	NA	NA	NA	NA	NA	NA	NA	NA
FI	IL8	IVW-RE	1	-0.0464285714285714	0.678571428571428	-1.37640413236646	1.28354698950932	0.945450463522519	NA	NA
FI	IL8	MR-Egger	NA	NA	NA	NA	NA	NA	NA	NA
FI	IL8	Weighted Median	NA	NA	NA	NA	NA	NA	NA	NA
FI	IL9	IVW-RE	1	-0.457142857142857	1.04285714285714	-2.5011052981632	1.58681958387748	0.661128117889932	NA	NA
FI	IL9	MR-Egger	NA	NA	NA	NA	NA	NA	NA	NA
FI	IL9	Weighted Median	NA	NA	NA	NA	NA	NA	NA	NA
FI	IP10	IVW-RE	1	0.271428571428571	0.675	-1.05154711813597	1.59440426099311	0.687598362163512	NA	NA
FI	IP10	MR-Egger	NA	NA	NA	NA	NA	NA	NA	NA
FI	IP10	Weighted Median	NA	NA	NA	NA	NA	NA	NA	NA
FI	MCP1	IVW-RE	1	0.567857142857143	0.546428571428571	-0.503123177266529	1.63883746298081	0.298704436736342	NA	NA
FI	MCP1	MR-Egger	NA	NA	NA	NA	NA	NA	NA	NA
FI	MCP1	Weighted Median	NA	NA	NA	NA	NA	NA	NA	NA
FI	MCP3	IVW-RE	1	1935-02-01	1.86428571428571	-1.30393285689253	6.00393285689253	0.207475925996304	NA	NA
FI	MCP3	MR-Egger	NA	NA	NA	NA	NA	NA	NA	NA
FI	MCP3	Weighted Median	NA	NA	NA	NA	NA	NA	NA	NA
FI	MCSF	IVW-RE	1	-0.953571428571429	2025-01-01	-3.4035264092465	1.49638355210364	0.445548597763713	NA	NA
FI	MCSF	MR-Egger	NA	NA	NA	NA	NA	NA	NA	NA
FI	MCSF	Weighted Median	NA	NA	NA	NA	NA	NA	NA	NA
FI	MIF	IVW-RE	1	1	1.06428571428571	-1.08596166926049	3.08596166926049	0.347424153832005	NA	NA
FI	MIF	MR-Egger	NA	NA	NA	NA	NA	NA	NA	NA
FI	MIF	Weighted Median	NA	NA	NA	NA	NA	NA	NA	NA
FI	MIG	IVW-RE	1	0.364285714285714	1.03214285714286	-1.65867711261455	2.38724854118598	0.724132540388919	NA	NA
FI	MIG	MR-Egger	NA	NA	NA	NA	NA	NA	NA	NA
FI	MIG	Weighted Median	NA	NA	NA	NA	NA	NA	NA	NA
FI	MIP1a	IVW-RE	1	-0.107142857142857	1.05714285714286	-2.17910478365663	1.96481906937091	0.919271553535771	NA	NA
FI	MIP1a	MR-Egger	NA	NA	NA	NA	NA	NA	NA	NA
FI	MIP1a	Weighted Median	NA	NA	NA	NA	NA	NA	NA	NA
FI	MIP1b	IVW-RE	1	-0.228571428571429	0.7	-1.60054621774947	1.14340336060661	0.744022932170302	NA	NA
FI	MIP1b	MR-Egger	NA	NA	NA	NA	NA	NA	NA	NA
FI	MIP1b	Weighted Median	NA	NA	NA	NA	NA	NA	NA	NA
FI	PDGFbb	IVW-RE	1	-0.392857142857143	0.7	-1.76483193203518	0.979117646320895	0.57464451002413	NA	NA
FI	PDGFbb	MR-Egger	NA	NA	NA	NA	NA	NA	NA	NA
FI	PDGFbb	Weighted Median	NA	NA	NA	NA	NA	NA	NA	NA
FI	RANTES	IVW-RE	1	0.517857142857143	1.075	-1.58910414052341	2.6248184262377	0.629999484787815	NA	NA
FI	RANTES	MR-Egger	NA	NA	NA	NA	NA	NA	NA	NA
FI	RANTES	Weighted Median	NA	NA	NA	NA	NA	NA	NA	NA
FI	sCD40L	IVW-RE	1	-0.03732	0.873496428571429	-1.74934154062436	1.67470154062436	0.965920873764269	NA	NA
FI	sCD40L	MR-Egger	NA	NA	NA	NA	NA	NA	NA	NA
FI	sCD40L	Weighted Median	NA	NA	NA	NA	NA	NA	NA	NA
FI	SCF	IVW-RE	1	0.0678571428571429	0.696428571428571	-1.29711777494754	1.43283206066182	0.922380238308133	NA	NA
FI	SCF	MR-Egger	NA	NA	NA	NA	NA	NA	NA	NA
FI	SCF	Weighted Median	NA	NA	NA	NA	NA	NA	NA	NA
FI	SCGFb	IVW-RE	1	1.67857142857143	1.03214285714286	-0.344391398328841	3.7015342554717	0.1038863667998	NA	NA
FI	SCGFb	MR-Egger	NA	NA	NA	NA	NA	NA	NA	NA
FI	SCGFb	Weighted Median	NA	NA	NA	NA	NA	NA	NA	NA
FI	SDF1a	IVW-RE	1	-0.267857142857143	0.721428571428571	-1.68183116027532	1.14611687456104	0.710423683714182	NA	NA
FI	SDF1a	MR-Egger	NA	NA	NA	NA	NA	NA	NA	NA
FI	SDF1a	Weighted Median	NA	NA	NA	NA	NA	NA	NA	NA
FI	SeSelectin	IVW-RE	1	0.304495357142857	0.861382142857143	-1.38378261978308	1.99277333406879	0.723716439757806	NA	NA
FI	SeSelectin	MR-Egger	NA	NA	NA	NA	NA	NA	NA	NA
FI	SeSelectin	Weighted Median	NA	NA	NA	NA	NA	NA	NA	NA
FI	sICAM	IVW-RE	1	-0.931546428571429	0.861057142857143	-2.61918741720239	0.756094560059531	0.279313116241309	NA	NA
FI	sICAM	MR-Egger	NA	NA	NA	NA	NA	NA	NA	NA
FI	sICAM	Weighted Median	NA	NA	NA	NA	NA	NA	NA	NA
FI	sVCAM	IVW-RE	1	1.25327142857143	0.861167857142857	-0.434586556072105	2.94112941321496	0.145581777491361	NA	NA
FI	sVCAM	MR-Egger	NA	NA	NA	NA	NA	NA	NA	NA
FI	sVCAM	Weighted Median	NA	NA	NA	NA	NA	NA	NA	NA
FI	TNFa	IVW-RE	1	0.0214285714285714	0.675	-1.30154711813597	1.34440426099311	0.974674585344451	NA	NA
FI	TNFa	MR-Egger	NA	NA	NA	NA	NA	NA	NA	NA
FI	TNFa	Weighted Median	NA	NA	NA	NA	NA	NA	NA	NA
FI	TNFb	IVW-RE	1	1.41785714285714	1.58214285714286	-1.68308587554016	4.51880016125444	0.370165965588256	NA	NA
FI	TNFb	MR-Egger	NA	NA	NA	NA	NA	NA	NA	NA
FI	TNFb	Weighted Median	NA	NA	NA	NA	NA	NA	NA	NA
FI	TRAIL	IVW-RE	1	-0.314285714285714	0.7	-1.68626050346375	1.05768907489232	0.653446378711744	NA	NA
FI	TRAIL	MR-Egger	NA	NA	NA	NA	NA	NA	NA	NA
FI	TRAIL	Weighted Median	NA	NA	NA	NA	NA	NA	NA	NA
FI	VEGF	IVW-RE	1	-1.10714285714286	0.575	-2.23412214825339	0.0198364339676735	0.0541711057553755	NA	NA
FI	VEGF	MR-Egger	NA	NA	NA	NA	NA	NA	NA	NA
FI	VEGF	Weighted Median	NA	NA	NA	NA	NA	NA	NA	NA
glucose	activePAI	IVW-RE	13	-0.00867180774252682	0.219096103104562	-0.438092278980543	0.42074866349549	0.968428030919251	NA	NA
glucose	activePAI	MR-Egger	13	0.119341148316294	0.528590061812266	-0.916676335421548	1.15535863205414	0.821378295186249	-0.00561056517822124	0.788346701839383
glucose	activePAI	MR-PRESSO	12	-0.231346074996604	0.213853841227931	-0.650499603803348	0.187807453810141	0.302488825148103	NA	0.041
glucose	activePAI	Weighted Median	13	-0.254304156401991	0.233356784882314	-0.711675050319388	0.203066737515405	0.275816486886711	NA	NA
glucose	bNGF	IVW-RE	13	-0.342257129771314	0.190749247809152	-0.716118785555358	0.0316045260127309	0.0727688488131417	NA	NA
glucose	bNGF	MR-Egger	13	-0.41179292300306	0.439553310081812	-1.27330158004878	0.449715734042658	0.348838759546603	0.00304943956980769	0.860614354510864
glucose	bNGF	MR-PRESSO	13	-0.342257129771314	0.190749247809152	-0.716118785555358	0.0316045260127309	0.0727688488131417	NA	0.79
glucose	bNGF	Weighted Median	13	-0.462802665842267	0.244566582442947	-0.942144359252488	0.0165390275679545	0.0584459455493197	NA	NA
glucose	CRP	IVW-RE	12	-0.0467478644447213	0.066170686090329	-0.176440026014072	0.082944297124629	0.479893461492909	NA	NA
glucose	CRP	MR-Egger	12	0.175504292127034	0.141499311554161	-0.101829262356334	0.452837846610401	0.214857407850981	-0.00979064089944451	0.0819455595203658
glucose	CRP	MR-PRESSO	9	-0.0161095878867797	0.0329079878425549	-0.0806092440581873	0.0483900682846279	0.637603590135218	NA	<0.001
glucose	CRP	Weighted Median	12	-0.00127561846749189	0.0260610149731246	-0.0523542692153752	0.0498030322803914	0.96096122833859	NA	NA
glucose	CTACK	IVW-RE	13	-0.182042185029971	0.187581541079008	-0.549695249709347	0.185610879649405	0.33181246580393	NA	NA
glucose	CTACK	MR-Egger	13	-0.0938329861531399	0.441501296122824	-0.959159625681629	0.771493653375349	0.831692311192668	-0.0038739968905578	0.824489751075561
glucose	CTACK	MR-PRESSO	13	-0.182042185029971	0.187581541079008	-0.549695249709347	0.185610879649405	0.33181246580393	NA	0.507
glucose	CTACK	Weighted Median	13	-0.193630448076808	0.259636539818825	-0.702508715192305	0.315247819038689	0.455803326677178	NA	NA
glucose	Eotaxin	IVW-RE	13	0.0852646666927931	0.135398864436359	-0.180112231150092	0.350641564535678	0.52887154204821	NA	NA
glucose	Eotaxin	MR-Egger	13	0.137646751900486	0.326072536999795	-0.501443676966717	0.776737180767688	0.67292621039039	-0.0022952183901215	0.858544983113885
glucose	Eotaxin	MR-PRESSO	13	0.0852646666927931	0.135398864436359	-0.180112231150092	0.350641564535678	0.52887154204821	NA	0.355
glucose	Eotaxin	Weighted Median	13	0.187727817326798	0.170767593568876	-0.146970515794773	0.522426150448368	0.271629567825899	NA	NA
glucose	FGFBasic	IVW-RE	13	0.0409403406966332	0.162571564865885	-0.277694071350818	0.359574752744084	0.801172736358206	NA	NA
glucose	FGFBasic	MR-Egger	13	0.290651149864638	0.383099245861388	-0.460209574528138	1.04151187425741	0.448041795225496	-0.0109328060482394	0.469592237299355
glucose	FGFBasic	MR-PRESSO	13	0.0409403406966332	0.162571564865885	-0.277694071350818	0.359574752744084	0.801172736358206	NA	0.361
glucose	FGFBasic	Weighted Median	13	0.071740992522763	0.207611645582663	-0.33517035559035	0.478652340635876	0.729678073482457	NA	NA
glucose	GCSF	IVW-RE	13	0.090319581141004	0.130618531719467	-0.165688036742653	0.346327199024661	0.489266451671664	NA	NA
glucose	GCSF	MR-Egger	13	0.579236977568751	0.296707933157817	-0.00229988534788761	1.16077384048539	0.0509129640881336	-0.0213908079470788	0.0675369449340106
glucose	GCSF	MR-PRESSO	13	0.090319581141004	0.130618531719467	-0.165688036742653	0.346327199024661	0.489266451671664	NA	0.438
glucose	GCSF	Weighted Median	13	0.26700412863441	0.167970463766695	-0.0622119308148019	0.596220188083622	0.111927307489734	NA	NA
glucose	GROa	IVW-RE	13	-0.0295053188570921	0.191140029789647	-0.404132893248713	0.345122255534529	0.877321997645332	NA	NA
glucose	GROa	MR-Egger	13	-0.00225432736884889	0.440652700411849	-0.865917749866392	0.861409095128694	0.99591813426997	-0.0011953260486259	0.94527977418317
glucose	GROa	MR-PRESSO	13	-0.0295053188570921	0.191140029789647	-0.404132893248713	0.345122255534529	0.877321997645332	NA	0.724
glucose	GROa	Weighted Median	13	0.0174775245229899	0.265275144653521	-0.502452204991564	0.537407254037544	0.947469768206111	NA	NA
glucose	HGF	IVW-RE	13	-0.125844563259674	0.146344019009032	-0.412673569870221	0.160984443350874	0.389831581781247	NA	NA
glucose	HGF	MR-Egger	13	0.134270742960743	0.34200286152143	-0.536042548230898	0.804584034152384	0.694614033404664	-0.0113933257712808	0.398767682168068
glucose	HGF	MR-PRESSO	13	-0.125844563259674	0.146344019009032	-0.412673569870221	0.160984443350874	0.389831581781247	NA	0.192
glucose	HGF	Weighted Median	13	-0.0636871860215783	0.171620593890251	-0.400057369051844	0.272682997008688	0.710568329800114	NA	NA
glucose	IFNg	IVW-RE	13	0.0617473084078219	0.135374848121842	-0.203582518323568	0.327077135139211	0.648302984208689	NA	NA
glucose	IFNg	MR-Egger	13	0.334739993257718	0.313453657102202	-0.279617885484964	0.949097872000401	0.285561545448469	-0.0119588035809994	0.333927611718846
glucose	IFNg	MR-PRESSO	13	0.0617473084078219	0.135374848121842	-0.203582518323568	0.327077135139211	0.648302984208689	NA	0.423
glucose	IFNg	Weighted Median	13	0.163819762536951	0.170874336514491	-0.171087782913629	0.498727307987531	0.337702419383873	NA	NA
glucose	IL10	IVW-RE	13	0.0644361061892145	0.130092097777382	-0.190539720127718	0.319411932506147	0.620380286489552	NA	NA
glucose	IL10	MR-Egger	13	0.257102700140855	0.303150683191717	-0.337061720803622	0.851267121085333	0.39638116895551	-0.00843995003153874	0.480770525937277
glucose	IL10	MR-PRESSO	13	0.0644361061892145	0.130092097777382	-0.190539720127718	0.319411932506147	0.620380286489552	NA	0.43
glucose	IL10	Weighted Median	13	0.12642571015182	0.184736231560285	-0.23565065034599	0.48850207064963	0.493749157173038	NA	NA
glucose	IL12p70	IVW-RE	13	0.0753501051570111	0.162092610815719	-0.242345574201866	0.393045784515888	0.642032891874819	NA	NA
glucose	IL12p70	MR-Egger	13	0.344821829954248	0.380338641605001	-0.400628209520441	1.09027186942894	0.364608879517164	-0.0118031468096777	0.431829333702752
glucose	IL12p70	MR-PRESSO	13	0.0753501051570111	0.162092610815719	-0.242345574201866	0.393045784515888	0.642032891874819	NA	0.081
glucose	IL12p70	Weighted Median	13	0.149059158661534	0.170588307275295	-0.185287779781697	0.483406097104764	0.382230067646223	NA	NA
glucose	IL13	IVW-RE	13	0.111119670319414	0.189975128365128	-0.261224739234611	0.483464079873439	0.558603569111973	NA	NA
glucose	IL13	MR-Egger	13	-0.0293349169621998	0.437663773441079	-0.887140150244612	0.828470316320212	0.946560886710466	0.00615715591150709	0.721669886151307
glucose	IL13	MR-PRESSO	13	0.111119670319414	0.189975128365128	-0.261224739234611	0.483464079873439	0.558603569111973	NA	0.895
glucose	IL13	Weighted Median	13	0.154153505485408	0.248308662138073	-0.33252252935454	0.640829540325357	0.534721979688942	NA	NA
glucose	IL16	IVW-RE	13	0.0275126023709023	0.20566407225985	-0.375581572172248	0.430606776914052	0.893580915291969	NA	NA
glucose	IL16	MR-Egger	13	-0.179765072353075	0.490051959050149	-1.14024926264466	0.780719117938515	0.71374687545667	0.00910253718746068	0.63871620897709
glucose	IL16	MR-PRESSO	13	0.0275126023709023	0.20566407225985	-0.375581572172248	0.430606776914052	0.893580915291969	NA	0.296
glucose	IL16	Weighted Median	13	0.234274906010114	0.270596650894943	-0.296084784081132	0.76463459610136	0.386615404845979	NA	NA
glucose	IL17	IVW-RE	13	-0.0359560688899396	0.100992937024286	-0.233898588150462	0.161986450370583	0.721821409256445	NA	NA
glucose	IL17	MR-Egger	13	0.253943260696107	0.233307876822497	-0.203331775185494	0.711218296577707	0.276397818050855	-0.0127072766773769	0.168081010547636
glucose	IL17	MR-PRESSO	13	-0.0359560688899396	0.100992937024286	-0.233898588150462	0.161986450370583	0.721821409256445	NA	0.478
glucose	IL17	Weighted Median	13	0.0282499097031937	0.142702917570818	-0.251442669224397	0.307942488630784	0.843073946546192	NA	NA
glucose	IL18	IVW-RE	13	-0.420022622737775	0.187798960213457	-0.78810182109022	-0.051943424385329	0.0253154669382128	NA	NA
glucose	IL18	MR-Egger	13	-0.0648614133706609	0.432634660527538	-0.912809766468347	0.783086939727026	0.880826227714246	-0.0155871704054995	0.362160403011495
glucose	IL18	MR-PRESSO	13	-0.420022622737775	0.187798960213457	-0.78810182109022	-0.051943424385329	0.0253154669382128	NA	0.588
glucose	IL18	Weighted Median	13	-0.344265635122149	0.267630788462007	-0.868812341661741	0.180281071417442	0.198322542635659	NA	NA
glucose	IL1a	IVW-RE	13	0.044227513751054	0.169868136229388	-0.288707915379489	0.377162942881597	0.794583162276779	NA	NA
glucose	IL1a	MR-Egger	13	-0.618373784918479	0.372139305204776	-1.3477534203516	0.111005850514641	0.0965783849898454	0.0290655418940748	0.0483642643207802
glucose	IL1a	MR-PRESSO	13	0.044227513751054	0.169868136229388	-0.288707915379489	0.377162942881597	0.794583162276779	NA	0.333
glucose	IL1a	Weighted Median	13	-0.119886574489068	0.226040532036035	-0.562917876325969	0.323144727347833	0.595850952079414	NA	NA
glucose	IL1b	IVW-RE	13	-0.0127119135009781	0.125545411250112	-0.258776397975468	0.233352570973512	0.919349220432884	NA	NA
glucose	IL1b	MR-Egger	13	-0.251275682436365	0.290159557309415	-0.819977964532903	0.317426599660173	0.386494875728708	0.0104626111476874	0.361786996520109
glucose	IL1b	MR-PRESSO	13	-0.0127119135009781	0.125545411250112	-0.258776397975468	0.233352570973512	0.919349220432884	NA	0.872
glucose	IL1b	Weighted Median	13	-0.184677199774567	0.170223097937642	-0.518308341069179	0.148953941520045	0.277960325187368	NA	NA
glucose	IL1RA	IVW-RE	13	-0.0431292864711416	0.150230959649486	-0.337576556747024	0.251317983804741	0.774046057780581	NA	NA
glucose	IL1RA	MR-Egger	13	-0.427047187436114	0.339091423755516	-1.09165416546334	0.237559790591107	0.207890735427444	0.0168519673399094	0.209157665285505
glucose	IL1RA	MR-PRESSO	13	-0.0431292864711416	0.150230959649486	-0.337576556747024	0.251317983804741	0.774046057780581	NA	0.123
glucose	IL1RA	Weighted Median	13	-0.15150342988976	0.184432486432782	-0.512984460877184	0.209977601097664	0.411385782485905	NA	NA
glucose	IL2	IVW-RE	13	0.244594456751484	0.191959938383098	-0.131640108953916	0.620829022456884	0.202594200375926	NA	NA
glucose	IL2	MR-Egger	13	0.346270560407168	0.442413967363524	-0.520844881882818	1.21338600269715	0.43381239913304	-0.0044568435741441	0.798658670671899
glucose	IL2	MR-PRESSO	13	0.244594456751484	0.191959938383098	-0.131640108953916	0.620829022456884	0.202594200375926	NA	0.972
glucose	IL2	Weighted Median	13	0.187304342561517	0.258955319515959	-0.320238757294825	0.694847442417859	0.469490943838516	NA	NA
glucose	IL2ra	IVW-RE	13	-0.300873242148223	0.186592897441367	-0.666588600904278	0.0648421166078313	0.10686227517648	NA	NA
glucose	IL2ra	MR-Egger	13	-0.650064898673458	0.430071910303224	-1.49299035363012	0.1928605562832	0.130654475007335	0.0153256796495985	0.367495970856519
glucose	IL2ra	MR-PRESSO	13	-0.300873242148223	0.186592897441367	-0.666588600904278	0.0648421166078313	0.10686227517648	NA	0.625
glucose	IL2ra	Weighted Median	13	-0.357914383513425	0.257892388192205	-0.863374176257169	0.147545409230319	0.165184576966616	NA	NA
glucose	IL4	IVW-RE	13	0.111730662274845	0.103245991193433	-0.0906277620124236	0.314089086562113	0.27917291707211	NA	NA
glucose	IL4	MR-Egger	13	0.33430598480451	0.237986440622119	-0.132138867623723	0.800750837232744	0.16010246622755	-0.0097434871133994	0.299615789693864
glucose	IL4	MR-PRESSO	13	0.111730662274845	0.103245991193433	-0.0906277620124236	0.314089086562113	0.27917291707211	NA	0.353
glucose	IL4	Weighted Median	13	0.126678527664905	0.147119769804656	-0.161670922566044	0.415027977895855	0.389206575376202	NA	NA
glucose	IL5	IVW-RE	13	-0.132798117859321	0.194919208508342	-0.514832746430725	0.249236510712083	0.495682783219331	NA	NA
glucose	IL5	MR-Egger	13	0.261188648210564	0.448673460660832	-0.618195175503614	1.14057247192474	0.560475566664171	-0.0172928493474565	0.32959944799161
glucose	IL5	MR-PRESSO	13	-0.132798117859321	0.194919208508342	-0.514832746430725	0.249236510712083	0.495682783219331	NA	0.545
glucose	IL5	Weighted Median	13	0.0619706483820408	0.264957219611518	-0.457335959500405	0.581277256264486	0.815070950227896	NA	NA
glucose	IL6	IVW-RE	13	0.1211096379692	0.0994873744716029	-0.0738820329115912	0.316101308849991	0.2234761139873	NA	NA
glucose	IL6	MR-Egger	13	0.0547684360564361	0.229877887300039	-0.395783943893798	0.505320816006671	0.811687099789304	0.00290924408419264	0.748872540454261
glucose	IL6	MR-PRESSO	13	0.1211096379692	0.0994873744716029	-0.0738820329115912	0.316101308849991	0.2234761139873	NA	0.76
glucose	IL6	Weighted Median	13	0.144179144600248	0.138579326876827	-0.127431345080137	0.415789634280633	0.298150037056171	NA	NA
glucose	IL7	IVW-RE	13	0.0264966063598607	0.194200028616994	-0.354128455526096	0.407121668245817	0.891473639287487	NA	NA
glucose	IL7	MR-Egger	13	-0.166075975050558	0.447555693149803	-1.04326901470003	0.711117064598916	0.710582925351967	0.00843029187719797	0.632950627173272
glucose	IL7	MR-PRESSO	13	0.0264966063598607	0.194200028616994	-0.354128455526096	0.407121668245817	0.891473639287487	NA	0.928
glucose	IL7	Weighted Median	13	-0.00682442698064846	0.259963107640548	-0.516342755265232	0.502693901303935	0.979056722203754	NA	NA
glucose	IL8	IVW-RE	13	-0.0518324512095403	0.133732887839979	-0.313944094924433	0.210279192505353	0.698325440988477	NA	NA
glucose	IL8	MR-Egger	13	-0.0640930894089556	0.32281820485283	-0.696805144474375	0.568618965656464	0.842620743022953	0.000537233169736726	0.966397489093254
glucose	IL8	MR-PRESSO	13	-0.0518324512095403	0.133732887839979	-0.313944094924433	0.210279192505353	0.698325440988477	NA	0.213
glucose	IL8	Weighted Median	13	-0.166805967483389	0.184186589883842	-0.527805050090969	0.194193115124191	0.365128659791713	NA	NA
glucose	IL9	IVW-RE	13	0.212021384704591	0.238683282131792	-0.255789251985534	0.679832021394716	0.37438159601288	NA	NA
glucose	IL9	MR-Egger	13	0.388282061921138	0.571416346409812	-0.731673397219558	1.50823752106183	0.496815948203785	-0.00773324647754793	0.732061913189217
glucose	IL9	MR-PRESSO	13	0.212021384704591	0.238683282131792	-0.255789251985534	0.679832021394716	0.37438159601288	NA	0.103
glucose	IL9	Weighted Median	13	0.138343151578469	0.256844822116492	-0.365063449385451	0.64174975254239	0.590145340161162	NA	NA
glucose	IP10	IVW-RE	13	-0.163095822236489	0.122560061785834	-0.403309129279727	0.0771174848067496	0.183273916845667	NA	NA
glucose	IP10	MR-Egger	13	-0.111661395302092	0.283393725785497	-0.667102891286286	0.443780100682101	0.693569921994856	-0.00225610336055057	0.840470035227159
glucose	IP10	MR-PRESSO	13	-0.163095822236489	0.122560061785834	-0.403309129279727	0.0771174848067496	0.183273916845667	NA	0.978
glucose	IP10	Weighted Median	13	-0.171324517044914	0.155725422163395	-0.476540735962464	0.133891701872635	0.271257837124562	NA	NA
glucose	MCP1	IVW-RE	13	0.0567206627054945	0.11663898151815	-0.171887540263512	0.285328865674501	0.626759791253136	NA	NA
glucose	MCP1	MR-Egger	13	0.589250281620551	0.229077070348214	0.140267474054104	1.038233089187	0.0101031252728478	-0.0233263470061787	0.00992794456137536
glucose	MCP1	MR-PRESSO	13	0.0567206627054945	0.11663898151815	-0.171887540263512	0.285328865674501	0.626759791253136	NA	0.142
glucose	MCP1	Weighted Median	13	0.163131148385841	0.137900484283147	-0.107148834259758	0.43341113103144	0.236823875352923	NA	NA
glucose	MCP3	IVW-RE	13	0.36462832245117	0.342351583426892	-0.306368451115798	1.03562509601814	0.286844357685492	NA	NA
glucose	MCP3	MR-Egger	13	0.318544066687072	0.822262606354049	-1.2930610276009	1.93014916097504	0.698460524205042	0.00203104616644919	0.950374746249194
glucose	MCP3	MR-PRESSO	13	0.36462832245117	0.342351583426892	-0.306368451115798	1.03562509601814	0.286844357685492	NA	0.477
glucose	MCP3	Weighted Median	13	0.139184342417613	0.455482610422955	-0.753545169595668	1.03191385443089	0.75992785014241	NA	NA
glucose	MCSF	IVW-RE	13	0.0870940132601591	0.26071825890387	-0.423904384303414	0.598092410823733	0.738338706518513	NA	NA
glucose	MCSF	MR-Egger	13	0.546006275954086	0.607905709688242	-0.64546702103113	1.7374795729393	0.369091763801938	-0.0201867671652285	0.401991511887031
glucose	MCSF	MR-PRESSO	13	0.0870940132601591	0.26071825890387	-0.423904384303414	0.598092410823733	0.738338706518513	NA	0.201
glucose	MCSF	Weighted Median	13	-0.0695336495583058	0.320333318926459	-0.697375417702348	0.558308118585737	0.828156478844389	NA	NA
glucose	MIF	IVW-RE	13	-0.289786019563708	0.191426752634396	-0.664975560404582	0.0854035212771663	0.130071004439443	NA	NA
glucose	MIF	MR-Egger	13	-0.666401487295053	0.440979147946846	-1.53070473520403	0.197901760613925	0.130741084120599	0.016532536569093	0.343117244569704
glucose	MIF	MR-PRESSO	13	-0.289786019563708	0.191426752634396	-0.664975560404582	0.0854035212771663	0.130071004439443	NA	0.659
glucose	MIF	Weighted Median	13	-0.475074133879372	0.261337881965332	-0.987286970327403	0.0371387025686585	0.069086439029487	NA	NA
glucose	MIG	IVW-RE	13	-0.427893009885777	0.18619287526113	-0.79282433957555	-0.0629616801960044	0.0215551315680615	NA	NA
glucose	MIG	MR-Egger	13	-0.671898265993328	0.429031374183849	-1.5127843076314	0.168987775644744	0.117329446865218	0.0107101999215744	0.527855885329631
glucose	MIG	MR-PRESSO	13	-0.427893009885777	0.18619287526113	-0.79282433957555	-0.0629616801960044	0.0215551315680615	NA	0.982
glucose	MIG	Weighted Median	13	-0.539686399854786	0.236261565080472	-1.00275055834358	-0.076622241365995	0.0223553708967886	NA	NA
glucose	MIP1a	IVW-RE	13	0.123849876630297	0.195670168760791	-0.259656606989728	0.507356360250321	0.526764815328435	NA	NA
glucose	MIP1a	MR-Egger	13	0.392291165534854	0.46222551866328	-0.513654203780521	1.29823653485023	0.396047803281067	-0.0117597043350907	0.519159851865783
glucose	MIP1a	MR-PRESSO	13	0.123849876630297	0.195670168760791	-0.259656606989728	0.507356360250321	0.526764815328435	NA	0.399
glucose	MIP1a	Weighted Median	13	0.367600729064114	0.259577682431889	-0.141162179692764	0.876363637820991	0.156731823695475	NA	NA
glucose	MIP1b	IVW-RE	13	-0.276199006720229	0.172367672618768	-0.614033437152004	0.0616354237115466	0.10907096947321	NA	NA
glucose	MIP1b	MR-Egger	13	0.221306548967723	0.380880494238978	-0.52520550215449	0.967818600089935	0.561213943510202	-0.0217912699999736	0.147284853054973
glucose	MIP1b	MR-PRESSO	13	-0.276199006720229	0.172367672618768	-0.614033437152004	0.0616354237115466	0.10907096947321	NA	0.046
glucose	MIP1b	Weighted Median	13	-0.00929446149893941	0.173189331193997	-0.348739313145752	0.330150390147874	0.957200890670699	NA	NA
glucose	PDGFbb	IVW-RE	13	0.11627207902021	0.17154849604651	-0.21995679483296	0.452500952873381	0.497911417920871	NA	NA
glucose	PDGFbb	MR-Egger	13	0.715671346995292	0.361865259895919	0.00642847034306471	1.42491422364752	0.0479593092129096	-0.0262643045096676	0.0661038694844716
glucose	PDGFbb	MR-PRESSO	13	0.11627207902021	0.17154849604651	-0.21995679483296	0.452500952873381	0.497911417920871	NA	0.04
glucose	PDGFbb	Weighted Median	13	0.223197934460218	0.173073258888947	-0.116019419649094	0.56241528856953	0.1971842371773	NA	NA
glucose	RANTES	IVW-RE	13	0.162883381018871	0.194105120263423	-0.217555663912254	0.543322425949996	0.401384940657782	NA	NA
glucose	RANTES	MR-Egger	13	0.590484138165842	0.447410832564999	-0.286424979954637	1.46739325628632	0.186908279734906	-0.0187422482674802	0.288804415463151
glucose	RANTES	MR-PRESSO	13	0.162883381018871	0.194105120263423	-0.217555663912254	0.543322425949996	0.401384940657782	NA	0.904
glucose	RANTES	Weighted Median	13	0.374002406570938	0.253966073457495	-0.123761950700805	0.87176676384268	0.140846212275485	NA	NA
glucose	sCD40L	IVW-RE	13	0.0903453499714913	0.160729099049011	-0.224677895432141	0.405368595375124	0.574049908554898	NA	NA
glucose	sCD40L	MR-Egger	13	-0.129507929401895	0.381823144232505	-0.877867540561446	0.618851681757656	0.734471855568095	0.00963784702492058	0.52323877279958
glucose	sCD40L	MR-PRESSO	13	0.0903453499714913	0.160729099049011	-0.224677895432141	0.405368595375124	0.574049908554898	NA	0.513
glucose	sCD40L	Weighted Median	13	0.117745796882015	0.207809992307145	-0.289554303667535	0.525045897431566	0.570983832271131	NA	NA
glucose	SCF	IVW-RE	13	-0.182105515733928	0.125604498376484	-0.428285808848057	0.0640747773802003	0.147105163421399	NA	NA
glucose	SCF	MR-Egger	13	-0.26759698172107	0.301572439156374	-0.858668101197459	0.323474137755319	0.374896423091003	0.00374332270623712	0.753133959451231
glucose	SCF	MR-PRESSO	13	-0.182105515733928	0.125604498376484	-0.428285808848057	0.0640747773802003	0.147105163421399	NA	0.47
glucose	SCF	Weighted Median	13	-0.127638865592347	0.17168014807965	-0.464125772688963	0.208848041504269	0.457197791635664	NA	NA
glucose	SCGFb	IVW-RE	13	-0.548769232866048	0.197704598235825	-0.936263124986226	-0.161275340745869	0.00550825122964098	NA	NA
glucose	SCGFb	MR-Egger	13	-0.00542280048587557	0.439615480305701	-0.867053308931326	0.856207707959575	0.990158083021936	-0.0238638336292584	0.170084604026952
glucose	SCGFb	MR-PRESSO	13	-0.548769232866048	0.197704598235825	-0.936263124986226	-0.161275340745869	0.00550825122964098	NA	0.405
glucose	SCGFb	Weighted Median	13	-0.457641083262535	0.244892213552194	-0.937621001919128	0.0223388353940577	0.0616583093811051	NA	NA
glucose	SDF1a	IVW-RE	13	0.0684365756402973	0.129591573711553	-0.185558241534213	0.322431392814808	0.597433864150369	NA	NA
glucose	SDF1a	MR-Egger	13	0.49667020056396	0.299203357461929	-0.089757604114885	1.0830980052428	0.0969194098350541	-0.0187709602784655	0.112304997426092
glucose	SDF1a	MR-PRESSO	13	0.0684365756402973	0.129591573711553	-0.185558241534213	0.322431392814808	0.597433864150369	NA	0.859
glucose	SDF1a	Weighted Median	13	0.185730924982874	0.168754818436349	-0.145022441369965	0.516484291335713	0.271072406384637	NA	NA
glucose	SeSelectin	IVW-RE	13	0.207877379297253	0.15799674626507	-0.101790553056796	0.517545311651303	0.188272501039097	NA	NA
glucose	SeSelectin	MR-Egger	13	0.3396467214406	0.366132947535079	-0.377960669281649	1.05725411216285	0.353584202638776	-0.00577481919696477	0.689928209293938
glucose	SeSelectin	MR-PRESSO	13	0.207877379297253	0.15799674626507	-0.101790553056796	0.517545311651303	0.188272501039097	NA	0.989
glucose	SeSelectin	Weighted Median	13	0.268694185468363	0.202202846644567	-0.127616111526464	0.665004482463189	0.18390246817665	NA	NA
glucose	sICAM	IVW-RE	13	-0.0116801746076491	0.157981691722627	-0.321318600600707	0.297958251385409	0.941063122332507	NA	NA
glucose	sICAM	MR-Egger	13	0.0425854928510008	0.366116905022298	-0.674990455123975	0.760161440825977	0.907401588330502	-0.00237813944860138	0.869492508094661
glucose	sICAM	MR-PRESSO	13	-0.0116801746076491	0.157981691722627	-0.321318600600707	0.297958251385409	0.941063122332507	NA	0.626
glucose	sICAM	Weighted Median	13	-0.0586303637860567	0.208069061718561	-0.466438231051477	0.349177503479364	0.778109761895319	NA	NA
glucose	sVCAM	IVW-RE	13	0.241297242262803	0.177477077720614	-0.106551438151016	0.589145922676623	0.173957595379637	NA	NA
glucose	sVCAM	MR-Egger	13	0.764830044660867	0.39231603863412	-0.00409526161943141	1.53375535094117	0.0512327239183608	-0.0229420863177853	0.13906409252916
glucose	sVCAM	MR-PRESSO	13	0.241297242262803	0.177477077720614	-0.106551438151016	0.589145922676623	0.173957595379637	NA	0.254
glucose	sVCAM	Weighted Median	13	0.506270616259103	0.209855772988903	0.0949608592530405	0.917580373265166	0.015844870428434	NA	NA
glucose	TNFa	IVW-RE	13	0.148991381387529	0.140250475108294	-0.125894498639358	0.423877261414417	0.288088830790836	NA	NA
glucose	TNFa	MR-Egger	13	0.264976123242233	0.336116952614493	-0.39380099847553	0.923753244959995	0.43049492515265	-0.00509081640286813	0.701860509157055
glucose	TNFa	MR-PRESSO	13	0.148991381387529	0.140250475108294	-0.125894498639358	0.423877261414417	0.288088830790836	NA	0.197
glucose	TNFa	Weighted Median	13	0.0542514178922442	0.17869352891616	-0.295981463053797	0.404484298838285	0.761432385023423	NA	NA
glucose	TNFb	IVW-RE	13	-0.168166906435841	0.285727280616983	-0.728182085845696	0.391848272974014	0.556158215542994	NA	NA
glucose	TNFb	MR-Egger	13	0.188664908456416	0.658614096296865	-1.10219499999583	1.47952481690867	0.774527785611016	-0.0156771897620132	0.54762235634249
glucose	TNFb	MR-PRESSO	13	-0.168166906435841	0.285727280616983	-0.728182085845696	0.391848272974014	0.556158215542994	NA	0.766
glucose	TNFb	Weighted Median	13	-0.0821777781024624	0.381231980716597	-0.829378730061861	0.665023173856937	0.829331939779878	NA	NA
glucose	TRAIL	IVW-RE	13	-0.129191948857671	0.125909089430514	-0.375969229467711	0.117585331752369	0.304857057134462	NA	NA
glucose	TRAIL	MR-Egger	13	-0.24595083057607	0.290540326752704	-0.815399407067869	0.323497745915729	0.397257667851517	0.00511594148591178	0.655658205151185
glucose	TRAIL	MR-PRESSO	13	-0.129191948857671	0.125909089430514	-0.375969229467711	0.117585331752369	0.304857057134462	NA	0.914
glucose	TRAIL	Weighted Median	13	-0.0800359888261869	0.165751853028082	-0.404903651132004	0.244831673479631	0.629190650736693	NA	NA
glucose	VEGF	IVW-RE	13	0.0217626889323599	0.103906604677438	-0.181890513991259	0.225415891855979	0.834101091239874	NA	NA
glucose	VEGF	MR-Egger	13	0.0303545994396688	0.247162220674115	-0.454074451420537	0.514783650299874	0.902255610188816	-0.000375803179866879	0.969253703502322
glucose	VEGF	MR-PRESSO	13	0.0217626889323599	0.103906604677438	-0.181890513991259	0.225415891855979	0.834101091239874	NA	0.574
glucose	VEGF	Weighted Median	13	0.0389329555356271	0.132652993376966	-0.221062133924657	0.298928044995911	0.769144020974158	NA	NA
hba1c	activePAI	IVW-RE	35	0.100805474780311	0.262114526465915	-0.412929556917654	0.614540506478275	0.700544457958345	NA	NA
hba1c	activePAI	MR-Egger	35	-0.147998538874001	0.541367619899442	-1.20905957627308	0.913062498525074	0.784561893300453	0.00522596778182852	0.598187190173482
hba1c	activePAI	MR-PRESSO	35	0.100805474780311	0.262114526465915	-0.412929556917654	0.614540506478275	0.700544457958345	NA	0.05
hba1c	activePAI	Weighted Median	35	0.311776684773701	0.350447366812901	-0.375087532656482	0.998640902203884	0.37365203347867	NA	NA
hba1c	bNGF	IVW-RE	35	0.0898548389705231	0.288364907997952	-0.475329995110668	0.655039673051714	0.755343654830816	NA	NA
hba1c	bNGF	MR-Egger	35	0.499667714211866	0.597538370458619	-0.671485971267779	1.67082139969151	0.403036629239464	-0.00853249078807889	0.432795366173876
hba1c	bNGF	MR-PRESSO	35	0.0898548389705231	0.288364907997952	-0.475329995110668	0.655039673051714	0.755343654830816	NA	0.214
hba1c	bNGF	Weighted Median	35	0.105086923385785	0.417690650518566	-0.713571708309711	0.923745555081282	0.801357743446521	NA	NA
hba1c	CRP	IVW-RE	35	-0.0283670242462292	0.0829872306846463	-0.191019007564853	0.134284959072395	0.732483373220558	NA	NA
hba1c	CRP	MR-Egger	35	-0.13597512673989	0.152625767167685	-0.435116133501347	0.163165880021568	0.372979899914422	0.00248763201182947	0.400006515670813
hba1c	CRP	MR-PRESSO	29	-0.00830968114156803	0.0350295285370581	-0.076967557074202	0.0603481947910659	0.814213758077423	NA	<0.001
hba1c	CRP	Weighted Median	35	-0.0295274407312832	0.0412792620299292	-0.110433307618336	0.0513784261557698	0.474417932667699	NA	NA
hba1c	CTACK	IVW-RE	35	-0.193025086805956	0.297301865215547	-0.77572603516501	0.389675861553098	0.516172775013896	NA	NA
hba1c	CTACK	MR-Egger	35	-0.454329829679438	0.614982209466313	-1.65967281136628	0.751013152007403	0.460047241567251	0.00547726034102281	0.626192182423332
hba1c	CTACK	MR-PRESSO	35	-0.193025086805956	0.297301865215547	-0.77572603516501	0.389675861553098	0.516172775013896	NA	0.135
hba1c	CTACK	Weighted Median	35	-0.128144035984673	0.405876558459398	-0.923647472734159	0.667359400764814	0.752213756282061	NA	NA
hba1c	Eotaxin	IVW-RE	35	0.050562765996159	0.203350868295004	-0.347997612086996	0.449123144079314	0.803633154383167	NA	NA
hba1c	Eotaxin	MR-Egger	35	-0.124969592669107	0.425311380175683	-0.958564580028467	0.708625394690253	0.768887181198395	0.00364655290258516	0.637252351411057
hba1c	Eotaxin	MR-PRESSO	35	0.050562765996159	0.203350868295004	-0.347997612086996	0.449123144079314	0.803633154383167	NA	0.107
hba1c	Eotaxin	Weighted Median	35	0.0699456186228896	0.289337075490232	-0.497144628730112	0.637035865975891	0.808978221042277	NA	NA
hba1c	FGFBasic	IVW-RE	35	0.0874176884837727	0.220365436103135	-0.344490629715834	0.519326006683379	0.691592984093093	NA	NA
hba1c	FGFBasic	MR-Egger	35	-0.0581460605737452	0.463663216937757	-0.96690926672773	0.85061714558024	0.900202289931644	0.00301321815062818	0.720196677922039
hba1c	FGFBasic	MR-PRESSO	35	0.0874176884837727	0.220365436103135	-0.344490629715834	0.519326006683379	0.691592984093093	NA	0.417
hba1c	FGFBasic	Weighted Median	35	0.0596094839396635	0.334527942449172	-0.596053235083001	0.715272202962328	0.858573880562448	NA	NA
hba1c	GCSF	IVW-RE	35	0.178763268001933	0.178500451512311	-0.171091188186334	0.5286177241902	0.316598497563658	NA	NA
hba1c	GCSF	MR-Egger	35	0.46104641288515	0.368581205307002	-0.261359474894936	1.18345230066524	0.210982662527172	-0.00586884877543775	0.381374657976147
hba1c	GCSF	MR-PRESSO	35	0.178763268001933	0.178500451512311	-0.171091188186334	0.5286177241902	0.316598497563658	NA	0.668
hba1c	GCSF	Weighted Median	35	0.23888265457782	0.264472194083851	-0.279473320738814	0.757238629894454	0.366396947788828	NA	NA
hba1c	GROa	IVW-RE	35	-0.0815991035570406	0.290917984064818	-0.651787874779081	0.488589667665	0.779102866942251	NA	NA
hba1c	GROa	MR-Egger	35	0.445494437565988	0.593764254768518	-0.718262117087572	1.60925099221955	0.453081022521773	-0.0110610099897339	0.30860959732625
hba1c	GROa	MR-PRESSO	35	-0.0815991035570406	0.290917984064818	-0.651787874779081	0.488589667665	0.779102866942251	NA	0.224
hba1c	GROa	Weighted Median	35	0.0839562189837749	0.422849460763456	-0.744813494994782	0.912725932962332	0.842615770721422	NA	NA
hba1c	HGF	IVW-RE	35	-0.211598640630248	0.212942447254551	-0.628958168028988	0.205760886768492	0.320374132351904	NA	NA
hba1c	HGF	MR-Egger	35	0.12644909696183	0.440851148526104	-0.737603276692453	0.990501470616112	0.77424290431197	-0.00703066076638565	0.380671899048098
hba1c	HGF	MR-PRESSO	34	-0.159373421967604	0.196311999700056	-0.544144941379714	0.225398097444506	0.422702538318135	NA	0.041
hba1c	HGF	Weighted Median	35	-0.025534310072194	0.276063078719897	-0.566608001824437	0.515539381680049	0.926305179164891	NA	NA
hba1c	IFNg	IVW-RE	35	0.0805730710379904	0.181263579085405	-0.274697015678232	0.435843157754213	0.656675505633332	NA	NA
hba1c	IFNg	MR-Egger	35	0.188723210539656	0.375374490824108	-0.546997272190656	0.924443693269967	0.615133147896335	-0.00224480670621741	0.74214437418202
hba1c	IFNg	MR-PRESSO	35	0.0805730710379904	0.181263579085405	-0.274697015678232	0.435843157754213	0.656675505633332	NA	0.879
hba1c	IFNg	Weighted Median	35	0.0187645476436961	0.266917110545194	-0.504383375882381	0.541912471169773	0.943954063169999	NA	NA
hba1c	IL10	IVW-RE	35	0.0189119950137944	0.181195377846893	-0.336224419731242	0.374048409758831	0.916872955049325	NA	NA
hba1c	IL10	MR-Egger	35	0.402886147358158	0.375149872616241	-0.332394091774463	1.13816638649078	0.28285233023225	-0.00796970984294118	0.242441195939733
hba1c	IL10	MR-PRESSO	35	0.0189119950137944	0.181195377846893	-0.336224419731242	0.374048409758831	0.916872955049325	NA	0.835
hba1c	IL10	Weighted Median	35	0.124599759601158	0.274387947439893	-0.413190735172902	0.662390254375218	0.649756347915211	NA	NA
hba1c	IL12p70	IVW-RE	35	0.199920738152932	0.174800400255167	-0.142681750830383	0.542523227136246	0.252744465046382	NA	NA
hba1c	IL12p70	MR-Egger	35	0.532460179959785	0.360851261165998	-0.174795295701428	1.239715655621	0.140060194048494	-0.00691696575199586	0.292165727821411
hba1c	IL12p70	MR-PRESSO	35	0.199920738152932	0.174800400255167	-0.142681750830383	0.542523227136246	0.252744465046382	NA	0.991
hba1c	IL12p70	Weighted Median	35	0.346032278194478	0.261608491688378	-0.16671094356459	0.858775499953546	0.185931696641254	NA	NA
hba1c	IL13	IVW-RE	35	0.464006689367597	0.294862023569555	-0.11391225723733	1.04192563597252	0.115570688807817	NA	NA
hba1c	IL13	MR-Egger	35	1.29500057920062	0.591807708707535	0.135078784360685	2.45492237404056	0.0286541819458086	-0.0173632648453477	0.107898247741712
hba1c	IL13	MR-PRESSO	35	0.464006689367597	0.294862023569555	-0.11391225723733	1.04192563597252	0.115570688807817	NA	0.163
hba1c	IL13	Weighted Median	35	1.11930563309134	0.391523360556842	0.351933947293838	1.88667731888884	0.00425182952036025	NA	NA
hba1c	IL16	IVW-RE	35	-0.341623342358397	0.266600784511501	-0.864151278251062	0.180904593534269	0.200051759508822	NA	NA
hba1c	IL16	MR-Egger	35	-0.218161876817417	0.548787301789857	-1.29376522349845	0.857441469863617	0.690973362564864	-0.00257424691286017	0.796882549165975
hba1c	IL16	MR-PRESSO	35	-0.341623342358397	0.266600784511501	-0.864151278251062	0.180904593534269	0.200051759508822	NA	0.812
hba1c	IL16	Weighted Median	35	-0.487241795641336	0.408432437686258	-1.2877546636243	0.313271072341629	0.232886731690089	NA	NA
hba1c	IL17	IVW-RE	35	0.0733710688912373	0.147900621153028	-0.2165088218598	0.363250959642275	0.619835447083196	NA	NA
hba1c	IL17	MR-Egger	35	0.237229520522464	0.336549509914708	-0.422395397924969	0.896854438969898	0.480880290685693	-0.00316695754738055	0.587803120141542
hba1c	IL17	MR-PRESSO	35	0.0733710688912373	0.147900621153028	-0.2165088218598	0.363250959642275	0.619835447083196	NA	0.654
hba1c	IL17	Weighted Median	35	0.167372230734529	0.208670071227046	-0.241613593521888	0.576358054990947	0.422500751360315	NA	NA
hba1c	IL18	IVW-RE	35	-0.685765067834541	0.348338267289009	-1.36849552615809	-0.00303460951099632	0.0489903482201734	NA	NA
hba1c	IL18	MR-Egger	35	-0.461136133547702	0.724101062883248	-1.88034813796604	0.958075870870636	0.524229416743777	-0.00469614481265876	0.722390115975263
hba1c	IL18	MR-PRESSO	33	-0.729459193187963	0.296751997304846	-1.31109310790546	-0.147825278470465	0.0195638195501664	NA	0.004
hba1c	IL18	Weighted Median	35	-0.513451285043149	0.411471407424992	-1.31992042426414	0.293017854177843	0.212088941228397	NA	NA
hba1c	IL1a	IVW-RE	35	-0.0588630758289119	0.230646412108426	-0.510921736724809	0.393195585066986	0.798561560842412	NA	NA
hba1c	IL1a	MR-Egger	35	-0.488828988228524	0.469183940083446	-1.40841261291668	0.430754636459628	0.297471641767511	0.00905287853132121	0.29287967740096
hba1c	IL1a	MR-PRESSO	35	-0.0588630758289119	0.230646412108426	-0.510921736724809	0.393195585066986	0.798561560842412	NA	0.378
hba1c	IL1a	Weighted Median	35	-0.391368167192366	0.348048841641827	-1.07353136167123	0.2907950272865	0.260816509205633	NA	NA
hba1c	IL1b	IVW-RE	35	0.0563361234222181	0.194581480223219	-0.325036569873784	0.43770881671822	0.772179964618839	NA	NA
hba1c	IL1b	MR-Egger	35	0.948693235645966	0.457367802504864	0.0522688150482037	1.84511765624373	0.0380564902291736	-0.01661184245827	0.0321414163702356
hba1c	IL1b	MR-PRESSO	35	0.0563361234222181	0.194581480223219	-0.325036569873784	0.43770881671822	0.772179964618839	NA	0.382
hba1c	IL1b	Weighted Median	35	0.108049538185668	0.282130824965897	-0.444916717676064	0.661015794047399	0.701737024709254	NA	NA
hba1c	IL1RA	IVW-RE	35	-0.0722282270285236	0.211599201759396	-0.486955041634363	0.342498587577316	0.732844239441562	NA	NA
hba1c	IL1RA	MR-Egger	35	0.0782596506684536	0.518001152925823	-0.937003953016385	1.09352325435329	0.879912553524994	-0.00280582408888653	0.749611850278312
hba1c	IL1RA	MR-PRESSO	35	-0.0722282270285236	0.211599201759396	-0.486955041634363	0.342498587577316	0.732844239441562	NA	0.114
hba1c	IL1RA	Weighted Median	35	-0.17153905763701	0.290122389532107	-0.74016849222864	0.39709037695462	0.554343239298664	NA	NA
hba1c	IL2	IVW-RE	35	0.637685183559894	0.29021639154496	0.0688715084085979	1.20649885871119	0.0280008213917334	NA	NA
hba1c	IL2	MR-Egger	35	1.44863950008085	0.584028483837122	0.30396470581456	2.59331429434714	0.013122545864124	-0.0169114689930113	0.112071687778995
hba1c	IL2	MR-PRESSO	35	0.637685183559894	0.29021639154496	0.0688715084085979	1.20649885871119	0.0280008213917334	NA	0.209
hba1c	IL2	Weighted Median	35	0.5	0.415087179522205	-0.313555922307833	1.31355592230783	0.228370799011215	NA	NA
hba1c	IL2ra	IVW-RE	35	-0.100233796378797	0.299665307926976	-0.687567007331774	0.487099414574181	0.738012989011153	NA	NA
hba1c	IL2ra	MR-Egger	35	-0.37266492410022	0.62281381866336	-1.59335757775427	0.848027729553825	0.549601840910336	0.00568711681189732	0.616599357512783
hba1c	IL2ra	MR-PRESSO	35	-0.100233796378797	0.299665307926976	-0.687567007331774	0.487099414574181	0.738012989011153	NA	0.108
hba1c	IL2ra	Weighted Median	35	0.0173303607862545	0.416603345699862	-0.799197192624364	0.833857914196873	0.966818220781302	NA	NA
hba1c	IL4	IVW-RE	35	0.178306601674436	0.146539584670275	-0.10890570658876	0.465518909937633	0.22368750077781	NA	NA
hba1c	IL4	MR-Egger	35	0.209968804834064	0.33136991966809	-0.439504303275324	0.859441912943452	0.526316639133398	-0.000614112673676025	0.915159957770765
hba1c	IL4	MR-PRESSO	35	0.178306601674436	0.146539584670275	-0.10890570658876	0.465518909937633	0.22368750077781	NA	0.706
hba1c	IL4	Weighted Median	35	0.251350109878078	0.215718856789155	-0.171451080214819	0.674151299970976	0.243948367655014	NA	NA
hba1c	IL5	IVW-RE	35	0.647611695452164	0.294342154393524	0.0707116737089284	1.2245117171954	0.0277926872640696	NA	NA
hba1c	IL5	MR-Egger	35	1.54246915057368	0.584858627890586	0.396167303860616	2.68877099728674	0.00835598354355627	-0.0187420892523506	0.0795004567068687
hba1c	IL5	MR-PRESSO	35	0.647611695452164	0.294342154393524	0.0707116737089284	1.2245117171954	0.0277926872640696	NA	0.185
hba1c	IL5	Weighted Median	35	0.861863909327509	0.427399764096642	0.0241757646971753	1.69955205395784	0.0437447156761137	NA	NA
hba1c	IL6	IVW-RE	35	0.0702977317869691	0.161111090084422	-0.245474202288486	0.386069665862424	0.662596733987581	NA	NA
hba1c	IL6	MR-Egger	35	0.231942739665426	0.368726405583233	-0.49074773542662	0.954633214757472	0.52932450019722	-0.00313561159357482	0.625057694505417
hba1c	IL6	MR-PRESSO	35	0.0702977317869691	0.161111090084422	-0.245474202288486	0.386069665862424	0.662596733987581	NA	0.195
hba1c	IL6	Weighted Median	35	0.265887642183264	0.220655067147685	-0.166588342432466	0.698363626798993	0.228206300142436	NA	NA
hba1c	IL7	IVW-RE	35	0.063384953925687	0.29518086648865	-0.515158913317393	0.641928821168767	0.829975806935204	NA	NA
hba1c	IL7	MR-Egger	35	0.535488652310146	0.60680124449544	-0.653819932675	1.72479723729529	0.377518457476768	-0.00987520488836699	0.372755689585932
hba1c	IL7	MR-PRESSO	35	0.063384953925687	0.29518086648865	-0.515158913317393	0.641928821168767	0.829975806935204	NA	0.218
hba1c	IL7	Weighted Median	35	0.449058607835052	0.425764968454205	-0.385425396214021	1.28354261188413	0.291557936076848	NA	NA
hba1c	IL8	IVW-RE	35	-0.0442060265603199	0.185327074391691	-0.40744041772821	0.31902836460757	0.811470219539742	NA	NA
hba1c	IL8	MR-Egger	35	0.423943462223306	0.447133520825935	-0.452422134876115	1.30030905932273	0.34306013870857	-0.00872842682205421	0.249947779848394
hba1c	IL8	MR-PRESSO	35	-0.0442060265603199	0.185327074391691	-0.40744041772821	0.31902836460757	0.811470219539742	NA	0.504
hba1c	IL8	Weighted Median	35	-0.0725949826877579	0.292073273346548	-0.645048079293713	0.499858113918198	0.803708437184558	NA	NA
hba1c	IL9	IVW-RE	35	0.567224233843573	0.292240891931763	-0.00555738915254422	1.14000585683969	0.0522646434900199	NA	NA
hba1c	IL9	MR-Egger	35	1.46964414906063	0.582251270277966	0.328452629363123	2.61083566875814	0.0116004155003731	-0.018842849186027	0.076017315613722
hba1c	IL9	MR-PRESSO	35	0.567224233843573	0.292240891931763	-0.00555738915254422	1.14000585683969	0.0522646434900199	NA	0.164
hba1c	IL9	Weighted Median	35	0.83223113035678	0.410175700762693	0.0283015295284242	1.63616073118514	0.0424621062461316	NA	NA
hba1c	IP10	IVW-RE	35	-0.188150075508094	0.295577487478626	-0.76747130560704	0.391171154590852	0.524417504707578	NA	NA
hba1c	IP10	MR-Egger	35	0.0729158848664444	0.721172434513643	-1.34055611342337	1.48638788315626	0.919465187223126	-0.00487364348524851	0.690712859470664
hba1c	IP10	MR-PRESSO	34	-0.0492009098853375	0.195359387312047	-0.43210530901695	0.333703489246275	0.802720298785323	NA	<0.001
hba1c	IP10	Weighted Median	35	-0.255835335995197	0.270209771769055	-0.785436756933334	0.273766084942939	0.343739336043018	NA	NA
hba1c	MCP1	IVW-RE	35	0.239831530511846	0.153935538072706	-0.0618765800514526	0.541539641075145	0.119233306341284	NA	NA
hba1c	MCP1	MR-Egger	35	-0.0327006191429232	0.349857992987037	-0.718409685100981	0.653008446815135	0.925531561200579	0.00528121048249979	0.38527377445062
hba1c	MCP1	MR-PRESSO	35	0.239831530511846	0.153935538072706	-0.0618765800514526	0.541539641075145	0.119233306341284	NA	0.304
hba1c	MCP1	Weighted Median	35	0.266947852658869	0.219341349986976	-0.162953293635998	0.696848998953736	0.223587859267187	NA	NA
hba1c	MCP3	IVW-RE	35	-0.144146811005822	0.47750078642419	-1.08003115498679	0.791737532975142	0.762745340929034	NA	NA
hba1c	MCP3	MR-Egger	35	0.211105782552936	0.98829010484828	-1.72590722922701	2.14811879433288	0.830853462744345	-0.00737729260968053	0.68139262715026
hba1c	MCP3	MR-PRESSO	35	-0.144146811005822	0.47750078642419	-1.08003115498679	0.791737532975142	0.762745340929034	NA	0.704
hba1c	MCP3	Weighted Median	35	-0.14261895208504	0.698689282680314	-1.51202478252258	1.2267868783525	0.838256934344145	NA	NA
hba1c	MCSF	IVW-RE	35	0.0959683189804348	0.316362101488943	-0.5240900060113	0.716026643972169	0.761623445533552	NA	NA
hba1c	MCSF	MR-Egger	35	0.505623961496828	0.654514476454089	-0.777200839713275	1.78844876270693	0.439807918821658	-0.00851892663217904	0.474522234789196
hba1c	MCSF	MR-PRESSO	35	0.0959683189804348	0.316362101488943	-0.5240900060113	0.716026643972169	0.761623445533552	NA	0.525
hba1c	MCSF	Weighted Median	35	-0.00557370639012413	0.485746745716113	-0.95761983360124	0.946472420820992	0.990844865709994	NA	NA
hba1c	MIF	IVW-RE	35	-0.243545135337749	0.313640645051987	-0.858269503727555	0.371179233052057	0.437447847078251	NA	NA
hba1c	MIF	MR-Egger	35	-1.25440136013952	0.621877350886883	-2.47325857067898	-0.0355441496000466	0.0436829721511296	0.0211188145650173	0.062728181813088
hba1c	MIF	MR-PRESSO	35	-0.243545135337749	0.313640645051987	-0.858269503727555	0.371179233052057	0.437447847078251	NA	0.081
hba1c	MIF	Weighted Median	35	-0.482540512645288	0.403911888822277	-1.2741932676645	0.309112242373921	0.232216862386337	NA	NA
hba1c	MIG	IVW-RE	35	-0.512021658361127	0.335992697215774	-1.17055524397251	0.146511927250261	0.127531918475714	NA	NA
hba1c	MIG	MR-Egger	35	-0.217365303822482	0.69786400300878	-1.58515361582664	1.15042300818168	0.755441600185944	-0.00615546836172349	0.628797483026289
hba1c	MIG	MR-PRESSO	34	-0.409790610155255	0.290362667233414	-0.978901437932747	0.159320217622236	0.167513544987754	NA	0.006
hba1c	MIG	Weighted Median	35	-0.250650251572306	0.416403269661297	-1.06678566315317	0.565485160008556	0.547213329784991	NA	NA
hba1c	MIP1a	IVW-RE	35	0.762732603505001	0.30116927423056	0.172451672763037	1.35301353424697	0.0113229400222177	NA	NA
hba1c	MIP1a	MR-Egger	35	2.05218814224111	0.57253158253643	0.930046860457981	3.17432942402423	0.000337840552165014	-0.0269368645292071	0.00991346564497597
hba1c	MIP1a	MR-PRESSO	35	0.762732603505001	0.30116927423056	0.172451672763037	1.35301353424697	0.0113229400222177	NA	0.111
hba1c	MIP1a	Weighted Median	35	1.17747087567916	0.418207193826815	0.357799837703038	1.99714191365528	0.00486983086740466	NA	NA
hba1c	MIP1b	IVW-RE	35	-0.250000090390381	0.21476683242949	-0.670935347025931	0.170935166245169	0.244402317322601	NA	NA
hba1c	MIP1b	MR-Egger	35	0.658405000401244	0.410712787839768	-0.146577271754741	1.46338727255723	0.108917237792783	-0.0189386358272585	0.0113951507695429
hba1c	MIP1b	MR-PRESSO	34	-0.193834231879836	0.194892682787869	-0.575823890144059	0.188155426384388	0.327183092676358	NA	0.032
hba1c	MIP1b	Weighted Median	35	-0.00140906867666661	0.255498834373562	-0.502177582140812	0.499359444787479	0.995599712046083	NA	NA
hba1c	PDGFbb	IVW-RE	35	0.260226655997553	0.177329090708414	-0.0873319752021744	0.60778528719728	0.142245890892792	NA	NA
hba1c	PDGFbb	MR-Egger	35	0.346246080525563	0.371145039878908	-0.381184830677778	1.07367699172891	0.350864822993981	-0.00178870223191609	0.791060496773617
hba1c	PDGFbb	MR-PRESSO	35	0.260226655997553	0.177329090708414	-0.0873319752021744	0.60778528719728	0.142245890892792	NA	0.454
hba1c	PDGFbb	Weighted Median	35	0.123899155006186	0.260542355743643	-0.386754478698577	0.634552788710949	0.634399823668232	NA	NA
hba1c	RANTES	IVW-RE	35	0.4668661113814	0.322921028033884	-0.166047473415662	1.09977969617846	0.148244697589365	NA	NA
hba1c	RANTES	MR-Egger	35	1.49968640381369	0.635730222632043	0.253678063571252	2.74569474405612	0.0183243483046778	-0.0216996744033642	0.0622950825955575
hba1c	RANTES	MR-PRESSO	35	0.4668661113814	0.322921028033884	-0.166047473415662	1.09977969617846	0.148244697589365	NA	0.046
hba1c	RANTES	Weighted Median	35	0.750369684170278	0.402799549777832	-0.0391029263832215	1.53984229472378	0.06247829221997	NA	NA
hba1c	sCD40L	IVW-RE	35	-0.0793922710127166	0.273231169009443	-0.614915521725002	0.456130979699569	0.771381634130431	NA	NA
hba1c	sCD40L	MR-Egger	35	0.518847577541051	0.553182359591166	-0.56536992414052	1.60306507922262	0.348279226216011	-0.0125779688190642	0.214740253785128
hba1c	sCD40L	MR-PRESSO	35	-0.0793922710127166	0.273231169009443	-0.614915521725002	0.456130979699569	0.771381634130431	NA	0.029
hba1c	sCD40L	Weighted Median	35	0.328917534561607	0.335502435943303	-0.328655156612722	0.986490225735936	0.32690202517852	NA	NA
hba1c	SCF	IVW-RE	35	-0.360351305550445	0.194726748137904	-0.742008718727338	0.0213061076264481	0.0642345242655084	NA	NA
hba1c	SCF	MR-Egger	35	-0.243672836676932	0.406539791202363	-1.040476185716	0.553130512362133	0.548917843650775	-0.00243068038782769	0.742708071297606
hba1c	SCF	MR-PRESSO	35	-0.360351305550445	0.194726748137904	-0.742008718727338	0.0213061076264481	0.0642345242655084	NA	0.19
hba1c	SCF	Weighted Median	35	-0.216001859012834	0.257080058448885	-0.719869514716101	0.287865796690433	0.400789293767709	NA	NA
hba1c	SCGFb	IVW-RE	35	-0.342785013266535	0.329366135103185	-0.988330775795931	0.302760749262861	0.297995526080546	NA	NA
hba1c	SCGFb	MR-Egger	35	0.918452717059394	0.637743375296179	-0.331501329900128	2.16840676401892	0.149822040542288	-0.0263808080419037	0.023494791819402
hba1c	SCGFb	MR-PRESSO	35	-0.342785013266535	0.329366135103185	-0.988330775795931	0.302760749262861	0.297995526080546	NA	0.008
hba1c	SCGFb	Weighted Median	35	0.0434154873243846	0.405347871790591	-0.751051742595133	0.837882717243902	0.914704303683961	NA	NA
hba1c	SDF1a	IVW-RE	35	0.14512451336249	0.180236363214431	-0.208132267242275	0.498381293967254	0.420710058798392	NA	NA
hba1c	SDF1a	MR-Egger	35	0.090690737633742	0.371916476518491	-0.638252161599536	0.819633636867021	0.807349275188008	0.0011325542632815	0.867117534680716
hba1c	SDF1a	MR-PRESSO	35	0.14512451336249	0.180236363214431	-0.208132267242275	0.498381293967254	0.420710058798392	NA	0.632
hba1c	SDF1a	Weighted Median	35	-0.00658590106512961	0.264821030507189	-0.525625583208004	0.512453781077744	0.980159252625646	NA	NA
hba1c	SeSelectin	IVW-RE	35	-0.779889881020051	1.34536010749423	-3.41674723794568	1.85696747590557	0.562124650570784	NA	NA
hba1c	SeSelectin	MR-Egger	35	1.53813338652775	2.74655638781171	-3.84501821509162	6.92128498814713	0.575464087795267	-0.0487612437201354	0.332871327635298
hba1c	SeSelectin	MR-PRESSO	33	-0.0801059920885926	0.287060684379837	-0.642744933473073	0.482532949295888	0.781997503739819	NA	<0.001
hba1c	SeSelectin	Weighted Median	35	0.110416612436745	0.348614543335355	-0.572855336987429	0.793688561860919	0.751448639617339	NA	NA
hba1c	sICAM	IVW-RE	35	-0.268904946924527	0.559568994635845	-1.36564002327607	0.827830129427017	0.630831192744767	NA	NA
hba1c	sICAM	MR-Egger	35	0.592499864942913	1.14824197654939	-1.65801305463098	2.8430127845168	0.605850148331774	-0.0180881203945751	0.389708283341681
hba1c	sICAM	MR-PRESSO	33	0.107407455163649	0.235814155131879	-0.354788288894834	0.569603199222132	0.651843199224708	NA	<0.001
hba1c	sICAM	Weighted Median	35	-0.0444583474321763	0.340959002112608	-0.712725711777604	0.623809016913252	0.896256246373912	NA	NA
hba1c	sVCAM	IVW-RE	35	-0.116600752789191	0.359348704765379	-0.820911272020451	0.587709766442068	0.745576167564199	NA	NA
hba1c	sVCAM	MR-Egger	35	0.24481987871688	0.741345517229534	-1.20819063515322	1.69783039258698	0.741220729411203	-0.00759571043892791	0.576057765958865
hba1c	sVCAM	MR-PRESSO	33	-0.106585720209835	0.242609053300749	-0.582099464679304	0.368928024259633	0.663374166292607	NA	<0.001
hba1c	sVCAM	Weighted Median	35	0.00352265542734802	0.343765533482441	-0.670245409324434	0.67729072017913	0.991824011089597	NA	NA
hba1c	TNFa	IVW-RE	35	0.406260448154825	0.195608051752931	0.0228757116330323	0.789645184676617	0.0378098055634279	NA	NA
hba1c	TNFa	MR-Egger	35	1.12698172413567	0.46232475709818	0.22084185106201	2.03312159720933	0.0147834527844222	-0.0133911435598856	0.0871698490192385
hba1c	TNFa	MR-PRESSO	35	0.406260448154825	0.195608051752931	0.0228757116330323	0.789645184676617	0.0378098055634279	NA	0.311
hba1c	TNFa	Weighted Median	35	0.314062491566762	0.283589033990505	-0.241761801465132	0.869886784598656	0.268096651473334	NA	NA
hba1c	TNFb	IVW-RE	35	0.236926101663033	0.433958408187235	-0.613616749172278	1.08746895249834	0.585089997237744	NA	NA
hba1c	TNFb	MR-Egger	35	0.578201176301043	0.895374913794798	-1.17670140739742	2.3331037599995	0.518431995531956	-0.00717469706775367	0.661826585944636
hba1c	TNFb	MR-PRESSO	35	0.236926101663033	0.433958408187235	-0.613616749172278	1.08746895249834	0.585089997237744	NA	0.223
hba1c	TNFb	Weighted Median	35	-0.0223388551996245	0.596796300940071	-1.19203811114889	1.14736040074964	0.970141124616218	NA	NA
hba1c	TRAIL	IVW-RE	34	-0.15997202638686	0.175967767775208	-0.504862513666176	0.184918460892455	0.363298156359143	NA	NA
hba1c	TRAIL	MR-Egger	34	0.219089399884898	0.362338885537393	-0.491081765966774	0.92926056573657	0.545409389234582	-0.00798019433450403	0.231401887538206
hba1c	TRAIL	MR-PRESSO	34	-0.15997202638686	0.175967767775208	-0.504862513666176	0.184918460892455	0.363298156359143	NA	0.667
hba1c	TRAIL	Weighted Median	34	-0.0447412240102854	0.260394668122916	-0.555105395297461	0.46562294727689	0.863578401147439	NA	NA
hba1c	VEGF	IVW-RE	35	0.0777395632617554	0.152737711809117	-0.221620850965171	0.377099977488682	0.610770269112427	NA	NA
hba1c	VEGF	MR-Egger	35	0.118291785553328	0.350455663810851	-0.568588693694018	0.805172264800674	0.735712055800662	-0.000778717386501763	0.897701535464755
hba1c	VEGF	MR-PRESSO	35	0.0777395632617554	0.152737711809117	-0.221620850965171	0.377099977488682	0.610770269112427	NA	0.783
hba1c	VEGF	Weighted Median	35	0.0810298688836858	0.215946775426895	-0.342218033530588	0.50427777129796	0.707488868533035	NA	NA
HDL	activePAI	IVW-RE	494	-0.0947964336613535	0.049821711533167	-0.192445193914505	0.00285232659179752	0.0570779642259621	NA	NA
HDL	activePAI	MR-Egger	494	0.030701120232068	0.0755891079327832	-0.117450808939698	0.178853049403834	0.684626518313804	-0.00370849663267689	0.0277268866318661
HDL	activePAI	MR-PRESSO	494	-0.0947964336613535	0.049821711533167	-0.192445193914505	0.00285232659179752	0.0570779642259621	NA	0.105
HDL	activePAI	Weighted Median	494	0.0426873735201734	0.085012269475618	-0.123933612896052	0.209308359936398	0.615574732923093	NA	NA
HDL	bNGF	IVW-RE	493	0.031318997316058	0.0606440374744541	-0.0875411320109694	0.150179126643085	0.605547242817208	NA	NA
HDL	bNGF	MR-Egger	493	0.174629052887958	0.0916844646139782	-0.00506919569727601	0.354327301473193	0.0568224083489828	-0.00424433743887207	0.0376445164763586
HDL	bNGF	MR-PRESSO	493	0.031318997316058	0.0606440374744541	-0.0875411320109694	0.150179126643085	0.605547242817208	NA	0.091
HDL	bNGF	Weighted Median	493	0.0429608102347839	0.0961342179169036	-0.145458794564272	0.23138041503384	0.654959069341988	NA	NA
HDL	CRP	IVW-RE	488	0.0393966956333067	0.0300245323991307	-0.0194503065216454	0.0982436977882588	0.189469467194558	NA	NA
HDL	CRP	MR-Egger	488	0.232560544155015	0.0436183943121287	0.147070062239776	0.318051026070254	9.7293267664611e-08	-0.00590196863119242	2.98665137066223e-09
HDL	CRP	MR-PRESSO	388	-0.00352281157723344	0.0114516142514157	-0.0259679755100083	0.0189223523555414	0.758532599284805	NA	<0.001
HDL	CRP	Weighted Median	488	0.0228935246681283	0.0131349377327478	-0.00285048022723354	0.0486375295634902	0.081342549261166	NA	NA
HDL	CTACK	IVW-RE	494	0.0597730079455812	0.0590586467427513	-0.055979812645885	0.175525828537047	0.311492253413945	NA	NA
HDL	CTACK	MR-Egger	494	-0.0333369084227766	0.0892658149062732	-0.208294690689691	0.141620873844137	0.708808634971957	0.00277988296500472	0.164527936378565
HDL	CTACK	MR-PRESSO	494	0.0597730079455812	0.0590586467427513	-0.055979812645885	0.175525828537047	0.311492253413945	NA	0.138
HDL	CTACK	Weighted Median	494	0.0241349137418772	0.0939298978882202	-0.159964303190559	0.208234130674314	0.797220441406869	NA	NA
HDL	Eotaxin	IVW-RE	494	0.0644959030018145	0.0383942568881293	-0.0107554577120978	0.139747263715727	0.0929899987435761	NA	NA
HDL	Eotaxin	MR-Egger	494	0.0565582501488279	0.0581619277737288	-0.0574370335591005	0.170553533856756	0.33083798382145	0.000236568874172113	0.85582822148189
HDL	Eotaxin	MR-PRESSO	494	0.0644959030018145	0.0383942568881293	-0.0107554577120978	0.139747263715727	0.0929899987435761	NA	0.922
HDL	Eotaxin	Weighted Median	494	0.0706588385770816	0.065177254720885	-0.0570862332870461	0.198403910441209	0.278319260711581	NA	NA
HDL	FGFBasic	IVW-RE	494	0.0377192239441266	0.0486547141156223	-0.0576422634005856	0.133080711288839	0.438196115204957	NA	NA
HDL	FGFBasic	MR-Egger	494	0.119541527311368	0.0735765691607048	-0.0246658983496335	0.26374895297237	0.104221643179012	-0.00244052010539592	0.138581066724099
HDL	FGFBasic	MR-PRESSO	494	0.0377192239441266	0.0486547141156223	-0.0576422634005856	0.133080711288839	0.438196115204957	NA	0.068
HDL	FGFBasic	Weighted Median	494	0.0659794206009613	0.0785889796558906	-0.0880521491063353	0.220010990308258	0.401160438659127	NA	NA
HDL	GCSF	IVW-RE	495	-0.000992391034807507	0.0389636563116646	-0.0773597541116668	0.0753749720420518	0.979680349342753	NA	NA
HDL	GCSF	MR-Egger	495	0.0376439761953216	0.0589393375147381	-0.0778750026062155	0.153162954996859	0.5230245010676	-0.00114984849657397	0.382297909056855
HDL	GCSF	MR-PRESSO	495	-0.000992391034807507	0.0389636563116646	-0.0773597541116668	0.0753749720420518	0.979680349342753	NA	0.692
HDL	GCSF	Weighted Median	495	0.0497671832505864	0.0657418530822937	-0.0790844810676327	0.178618847568806	0.449044390408376	NA	NA
HDL	GROa	IVW-RE	494	-0.0474404234210761	0.0609717890117836	-0.166942933957147	0.0720620871149948	0.436526746285905	NA	NA
HDL	GROa	MR-Egger	494	0.0606411294111302	0.0921586056045167	-0.119986418439154	0.241268677261414	0.510532783812018	-0.00322305289671802	0.118235127488976
HDL	GROa	MR-PRESSO	494	-0.0474404234210761	0.0609717890117836	-0.166942933957147	0.0720620871149948	0.436526746285905	NA	0.064
HDL	GROa	Weighted Median	494	-0.0675810142326715	0.0969796920276802	-0.257657717838711	0.122495689373368	0.48589205153472	NA	NA
HDL	HGF	IVW-RE	494	-0.0532747352262097	0.0430774858886753	-0.137705056112546	0.0311555856601262	0.216191508995234	NA	NA
HDL	HGF	MR-Egger	494	0.100477257741464	0.0646638782829714	-0.0262616147938419	0.227216130276769	0.120222818633307	-0.00458378244703529	0.00154793179543322
HDL	HGF	MR-PRESSO	493	-0.0614430635898526	0.04285530610754	-0.145439463560631	0.0225533363809259	0.152283690668058	NA	<0.001
HDL	HGF	Weighted Median	494	-0.00516303926060516	0.06875863551105	-0.13992748848838	0.12960140996717	0.940143644361462	NA	NA
HDL	IFNg	IVW-RE	494	0.0872768330152455	0.0406524476795479	0.00759949967993279	0.166954166350558	0.0318010612818849	NA	NA
HDL	IFNg	MR-Egger	494	0.139145172579485	0.0615611059700725	0.0184876220296893	0.259802723129281	0.023804043710459	-0.00154609378845222	0.26196763297704
HDL	IFNg	MR-PRESSO	494	0.0872768330152455	0.0406524476795479	0.00759949967993279	0.166954166350558	0.0318010612818849	NA	0.183
HDL	IFNg	Weighted Median	494	0.117447004094569	0.0669158889888575	-0.013705728317072	0.24859973650621	0.0792347231454404	NA	NA
HDL	IL10	IVW-RE	494	0.049268831598572	0.0406597328645429	-0.0304227804369516	0.128960443634096	0.225613740801028	NA	NA
HDL	IL10	MR-Egger	494	0.187422697042464	0.0610974255477649	0.0676739434207269	0.3071714506642	0.00215782477477888	-0.00411725326305508	0.00261018603083762
HDL	IL10	MR-PRESSO	494	0.049268831598572	0.0406597328645429	-0.0304227804369516	0.128960443634096	0.225613740801028	NA	0.164
HDL	IL10	Weighted Median	494	0.0946028953665023	0.067166179755567	-0.0370403979335522	0.226246188666557	0.158986013482231	NA	NA
HDL	IL12p70	IVW-RE	492	-0.00968472216085336	0.0401210514548004	-0.0883205380341404	0.0689510937124337	0.809254764127356	NA	NA
HDL	IL12p70	MR-Egger	492	0.100816549576201	0.0604915824581899	-0.0177447734096857	0.219377872562089	0.0955897643927319	-0.00329964159652354	0.0150404151186274
HDL	IL12p70	MR-PRESSO	492	-0.00968472216085336	0.0401210514548004	-0.0883205380341404	0.0689510937124337	0.809254764127356	NA	0.055
HDL	IL12p70	Weighted Median	492	0.0496176335117206	0.0646470110169486	-0.0770881797896628	0.176323446813104	0.442774616603706	NA	NA
HDL	IL13	IVW-RE	494	-0.0819168365718199	0.0577528991465102	-0.195110438901754	0.0312767657581142	0.156073386996441	NA	NA
HDL	IL13	MR-Egger	494	0.0694598790843204	0.0873959771276309	-0.101833088479523	0.240752846648163	0.426746117680035	-0.00451548373259978	0.0210125037481708
HDL	IL13	MR-PRESSO	494	-0.0819168365718199	0.0577528991465102	-0.195110438901754	0.0312767657581142	0.156073386996441	NA	0.595
HDL	IL13	Weighted Median	494	0.0261276597351328	0.0943674050957692	-0.158829055567076	0.211084375037342	0.781878657219747	NA	NA
HDL	IL16	IVW-RE	494	-0.118123397811716	0.0616875935834697	-0.23902885952826	0.00278206390482913	0.0555097556249937	NA	NA
HDL	IL16	MR-Egger	494	0.0292246514167456	0.0930232028803467	-0.153097475955296	0.211546778788788	0.753395585965958	-0.00439639047348884	0.0348165805080485
HDL	IL16	MR-PRESSO	494	-0.118123397811716	0.0616875935834697	-0.23902885952826	0.00278206390482913	0.0555097556249937	NA	0.033
HDL	IL16	Weighted Median	494	-0.0253584535241389	0.0975041893155411	-0.216463152924375	0.165746245876097	0.794805514336551	NA	NA
HDL	IL17	IVW-RE	497	0.0085352759377712	0.0313515181950773	-0.0529125705852326	0.069983122460775	0.78543408774613	NA	NA
HDL	IL17	MR-Egger	497	0.0452198898462672	0.0482117159130355	-0.0492733369761591	0.139713116668693	0.348273187767969	-0.00105633716605663	0.316534490854082
HDL	IL17	MR-PRESSO	497	0.0085352759377712	0.0313515181950773	-0.0529125705852326	0.069983122460775	0.78543408774613	NA	0.723
HDL	IL17	Weighted Median	497	0.0371931106818102	0.0533139631481699	-0.0673003369616984	0.141686558325319	0.485412245712084	NA	NA
HDL	IL18	IVW-RE	494	-0.171793062444915	0.0582295414418769	-0.285920866507276	-0.0576652583825536	0.00317492927340701	NA	NA
HDL	IL18	MR-Egger	494	-0.0790681096938957	0.0879935087448858	-0.251532217707182	0.0933959983193907	0.36888306101535	-0.0027690676656012	0.160180849414969
HDL	IL18	MR-PRESSO	494	-0.171793062444915	0.0582295414418769	-0.285920866507276	-0.0576652583825536	0.00317492927340701	NA	0.279
HDL	IL18	Weighted Median	494	-0.0704765325343458	0.0950248617138555	-0.256721839129402	0.11576877406071	0.458290850569748	NA	NA
HDL	IL1a	IVW-RE	495	0.0849244809156018	0.0503695739586256	-0.013798069959931	0.183647031791135	0.0917905254355228	NA	NA
HDL	IL1a	MR-Egger	495	0.107155135707253	0.0768107876172485	-0.0433912416467089	0.257701513061215	0.16299979490711	-0.000655866387684398	0.701270719945521
HDL	IL1a	MR-PRESSO	495	0.0849244809156018	0.0503695739586256	-0.013798069959931	0.183647031791135	0.0917905254355228	NA	0.152
HDL	IL1a	Weighted Median	495	0.102437164707253	0.0848194919769495	-0.063805984754552	0.268680314169058	0.227159664657204	NA	NA
HDL	IL1b	IVW-RE	497	0.0280461319545738	0.0396819329241594	-0.0497290274137128	0.10582129132286	0.479707349618758	NA	NA
HDL	IL1b	MR-Egger	497	0.0718068885766402	0.0615089520260721	-0.0487484421212631	0.192362219274544	0.243040090760216	-0.00123719701963275	0.351733029263197
HDL	IL1b	MR-PRESSO	497	0.0280461319545738	0.0396819329241594	-0.0497290274137128	0.10582129132286	0.479707349618758	NA	0.459
HDL	IL1b	Weighted Median	497	0.00418254533763314	0.0662208237699354	-0.125607884278014	0.13397297495328	0.949638638282274	NA	NA
HDL	IL1RA	IVW-RE	497	-0.0419878388554647	0.0390865978880716	-0.118596162994284	0.0346204852833551	0.282721411739487	NA	NA
HDL	IL1RA	MR-Egger	497	0.0231381241801044	0.0604171764560266	-0.095277365721309	0.141553614081518	0.701740067534279	-0.00184769768540931	0.157772390847601
HDL	IL1RA	MR-PRESSO	497	-0.0419878388554647	0.0390865978880716	-0.118596162994284	0.0346204852833551	0.282721411739487	NA	0.435
HDL	IL1RA	Weighted Median	497	-0.0696709276617612	0.0672629350444199	-0.201503857843281	0.0621620025197589	0.300295599504085	NA	NA
HDL	IL2	IVW-RE	493	0.000228234504202983	0.0604266136187809	-0.118205751896325	0.118662220904731	0.996986355129753	NA	NA
HDL	IL2	MR-Egger	493	0.00110697173398694	0.0914488421718688	-0.178129465350763	0.180343408818737	0.990341987217149	-2.62614649775632e-05	0.989777670622884
HDL	IL2	MR-PRESSO	493	0.000228234504202983	0.0604266136187809	-0.118205751896325	0.118662220904731	0.996986355129753	NA	0.123
HDL	IL2	Weighted Median	493	0.0343082542164445	0.0975342312224022	-0.156855326239266	0.225471834672155	0.725021234675273	NA	NA
HDL	IL2ra	IVW-RE	494	0.0354418158608366	0.0591165291463843	-0.080424452157089	0.151308083878762	0.548823083894599	NA	NA
HDL	IL2ra	MR-Egger	494	0.0903687771202401	0.0894751499436529	-0.0849992942806405	0.265736848521121	0.312501310361716	-0.00163959211817788	0.413349649529672
HDL	IL2ra	MR-PRESSO	494	0.0354418158608366	0.0591165291463843	-0.080424452157089	0.151308083878762	0.548823083894599	NA	0.092
HDL	IL2ra	Weighted Median	494	0.177719894487936	0.0948668340348698	-0.00821568354774765	0.363655472523619	0.0610184536015219	NA	NA
HDL	IL4	IVW-RE	497	0.058503658226422	0.0312850585782439	-0.0028139298411619	0.119821246294006	0.0614811604916391	NA	NA
HDL	IL4	MR-Egger	497	0.0294601645722587	0.0481127886339431	-0.0648391683460578	0.123759497490575	0.540329609219096	0.000836709018663033	0.426738252948669
HDL	IL4	MR-PRESSO	497	0.058503658226422	0.0312850585782439	-0.0028139298411619	0.119821246294006	0.0614811604916391	NA	0.417
HDL	IL4	Weighted Median	497	0.0668985225308943	0.0522822861102181	-0.0355728752745519	0.16936992033634	0.200698575632539	NA	NA
HDL	IL5	IVW-RE	493	-0.00305743961638338	0.0592912270915886	-0.119266109315082	0.113151230082316	0.958874132362594	NA	NA
HDL	IL5	MR-Egger	493	0.0381030996351544	0.089647279396376	-0.137602339293742	0.213808538564051	0.670812231939966	-0.00122995016781089	0.540441261909659
HDL	IL5	MR-PRESSO	493	-0.00305743961638338	0.0592912270915886	-0.119266109315082	0.113151230082316	0.958874132362594	NA	0.936
HDL	IL5	Weighted Median	493	0.0372080768823227	0.0956573675876517	-0.150276918445384	0.224693072210029	0.697296555417295	NA	NA
HDL	IL6	IVW-RE	497	0.0389558546348217	0.0317583692961756	-0.0232894053934052	0.101201114663049	0.219960668784609	NA	NA
HDL	IL6	MR-Egger	497	0.0347907785950791	0.0488575490252293	-0.0609682578672703	0.130549815057429	0.476411498478985	0.00012007993060112	0.91061377101189
HDL	IL6	MR-PRESSO	497	0.0389558546348217	0.0317583692961756	-0.0232894053934052	0.101201114663049	0.219960668784609	NA	0.17
HDL	IL6	Weighted Median	497	0.0716281779836546	0.0510136290858026	-0.0283566977452035	0.171613053712513	0.160289415736172	NA	NA
HDL	IL7	IVW-RE	494	0.027870236091926	0.0589369773907498	-0.087644116951595	0.143384589135447	0.636297363308987	NA	NA
HDL	IL7	MR-Egger	494	0.181508529069263	0.0891714934481535	0.00673561346323323	0.356281444675294	0.0418006402276272	-0.00458557345009769	0.0216800743898593
HDL	IL7	MR-PRESSO	494	0.027870236091926	0.0589369773907498	-0.087644116951595	0.143384589135447	0.636297363308987	NA	0.793
HDL	IL7	Weighted Median	494	0.0716277837409341	0.0995970893611668	-0.12357892437197	0.266834491853838	0.472032810252051	NA	NA
HDL	IL8	IVW-RE	497	-0.00110148648958003	0.0402116091741622	-0.0799147922313384	0.0777118192521783	0.978146878777748	NA	NA
HDL	IL8	MR-Egger	497	0.00696513182667287	0.0623028438324143	-0.115146198219283	0.129076461872628	0.91098613789915	-0.000228677794008734	0.865303983571757
HDL	IL8	MR-PRESSO	497	-0.00110148648958003	0.0402116091741622	-0.0799147922313384	0.0777118192521783	0.978146878777748	NA	0.123
HDL	IL8	Weighted Median	497	0.0433789996576231	0.0669192189632884	-0.087780259383972	0.174538258699218	0.516836642273023	NA	NA
HDL	IL9	IVW-RE	494	-0.0494837024972553	0.0582713657665078	-0.163693480729571	0.0647260757350602	0.395773271966229	NA	NA
HDL	IL9	MR-Egger	494	0.0465195212387286	0.0880332728823418	-0.126022523051848	0.219061565529305	0.597200140829353	-0.002867332477784	0.146056869793831
HDL	IL9	MR-PRESSO	494	-0.0494837024972553	0.0582713657665078	-0.163693480729571	0.0647260757350602	0.395773271966229	NA	0.26
HDL	IL9	Weighted Median	494	-0.0402289641972593	0.093296523867902	-0.223086790861129	0.14262886246661	0.666326826191396	NA	NA
HDL	IP10	IVW-RE	495	-0.0589671684034753	0.0406061360467296	-0.138553732606399	0.0206193957994482	0.146453275331416	NA	NA
HDL	IP10	MR-Egger	495	0.00142535654777623	0.0628179341746648	-0.121695532017775	0.124546245113327	0.981897328866882	-0.00171376887111052	0.207852245691416
HDL	IP10	MR-PRESSO	495	-0.0589671684034753	0.0406061360467296	-0.138553732606399	0.0206193957994482	0.146453275331416	NA	0.052
HDL	IP10	Weighted Median	495	-0.0649804844017569	0.0658565164134659	-0.194056884719421	0.0640959159159071	0.323790775090527	NA	NA
HDL	MCP1	IVW-RE	497	0.064813391070371	0.0307994612619563	0.00444755625370001	0.125179225887042	0.035346385793418	NA	NA
HDL	MCP1	MR-Egger	497	0.113111621255078	0.0473151036248339	0.0203757222256234	0.205847520284533	0.0168207374550777	-0.00139122646956879	0.178989095116393
HDL	MCP1	MR-PRESSO	497	0.064813391070371	0.0307994612619563	0.00444755625370001	0.125179225887042	0.035346385793418	NA	0.46
HDL	MCP1	Weighted Median	497	0.102208033653194	0.0515737677639884	0.00112530628874427	0.203290761017645	0.0475034950485549	NA	NA
HDL	MCP3	IVW-RE	493	0.0148058975072133	0.106485490190406	-0.193901828142076	0.223513623156503	0.889417390723611	NA	NA
HDL	MCP3	MR-Egger	493	0.316580078845248	0.160123304664044	0.00274416861818833	0.630415989072308	0.048030120859019	-0.00900727572478342	0.0119739803327277
HDL	MCP3	MR-PRESSO	493	0.0148058975072133	0.106485490190406	-0.193901828142076	0.223513623156503	0.889417390723611	NA	0.225
HDL	MCP3	Weighted Median	493	0.0917116679397767	0.174588171880793	-0.250474861073267	0.43389819695282	0.599372661864736	NA	NA
HDL	MCSF	IVW-RE	493	-0.0244898811714309	0.070508446141642	-0.162683896214931	0.11370413387207	0.728341470190763	NA	NA
HDL	MCSF	MR-Egger	493	0.0747049410856946	0.106621579306378	-0.134269514329588	0.283679396500977	0.483518354735592	-0.00296515411171365	0.215075994875315
HDL	MCSF	MR-PRESSO	493	-0.0244898811714309	0.070508446141642	-0.162683896214931	0.11370413387207	0.728341470190763	NA	0.261
HDL	MCSF	Weighted Median	493	0.00656255400542328	0.117410373454462	-0.223557549376719	0.236682657387566	0.955426124520552	NA	NA
HDL	MIF	IVW-RE	494	-0.177337252386105	0.0603790369285797	-0.295677990187335	-0.0589965145848746	0.00331332944381071	NA	NA
HDL	MIF	MR-Egger	494	-0.122586740532703	0.0913816437588614	-0.301691471148141	0.0565179900827348	0.179764328511199	-0.00163492286129925	0.424624787760298
HDL	MIF	MR-PRESSO	494	-0.177337252386105	0.0603790369285797	-0.295677990187335	-0.0589965145848746	0.00331332944381071	NA	0.126
HDL	MIF	Weighted Median	494	-0.0679756429288248	0.0986613328711067	-0.261348302022912	0.125397016165262	0.490836122717433	NA	NA
HDL	MIG	IVW-RE	493	-0.0396794212867902	0.0619459501280994	-0.161091252525979	0.0817324099523989	0.521815692555048	NA	NA
HDL	MIG	MR-Egger	493	0.0479507305350872	0.093643015044797	-0.135586206356457	0.231487667426632	0.608609853285222	-0.00262042719091806	0.212294694493353
HDL	MIG	MR-PRESSO	492	-0.0648164102384399	0.0605302688965341	-0.183455737275647	0.0538229167987669	0.284780999597704	NA	0.002
HDL	MIG	Weighted Median	493	-0.0342651784743919	0.0970475867918274	-0.224474953372899	0.155944596424115	0.724031428417132	NA	NA
HDL	MIP1a	IVW-RE	494	-0.0893919820742657	0.0584521510957884	-0.203956093040904	0.025172128892373	0.126185395192809	NA	NA
HDL	MIP1a	MR-Egger	494	0.0320233180960385	0.0882335656965484	-0.140911292896745	0.204957929088822	0.716651163702349	-0.00362406689440433	0.066717188332633
HDL	MIP1a	MR-PRESSO	494	-0.0893919820742657	0.0584521510957884	-0.203956093040904	0.025172128892373	0.126185395192809	NA	0.39
HDL	MIP1a	Weighted Median	494	0.0208301027599708	0.0979420449523078	-0.171132777918755	0.212792983438697	0.831578250910164	NA	NA
HDL	MIP1b	IVW-RE	494	-0.0815891795977011	0.0401245458400609	-0.160231844340247	-0.00294651485515522	0.0420123082778752	NA	NA
HDL	MIP1b	MR-Egger	494	0.0512493410019346	0.0603354973919683	-0.0670060608756337	0.169504742879503	0.395655346471821	-0.00395694667985929	0.00338432542752143
HDL	MIP1b	MR-PRESSO	489	-0.0707919877596061	0.0378399497498482	-0.144958289269309	0.00337431375009639	0.0619673458675455	NA	0.045
HDL	MIP1b	Weighted Median	494	0.0254081852949319	0.0643844835963964	-0.100783083717215	0.151599454307079	0.693114404759553	NA	NA
HDL	PDGFbb	IVW-RE	494	0.0415564724941289	0.0381356260560063	-0.0331879811035307	0.116300926091788	0.27584438273337	NA	NA
HDL	PDGFbb	MR-Egger	494	0.108710146142916	0.0577817915208231	-0.00454008420009942	0.221960376485931	0.0599187417473748	-0.00200076671419551	0.121870268017899
HDL	PDGFbb	MR-PRESSO	494	0.0415564724941289	0.0381356260560063	-0.0331879811035307	0.116300926091788	0.27584438273337	NA	0.702
HDL	PDGFbb	Weighted Median	494	0.104461887884739	0.0650201589830835	-0.0229752819911729	0.231899057760651	0.108140452985655	NA	NA
HDL	RANTES	IVW-RE	494	0.0767154064645911	0.0589438985911673	-0.038812511882478	0.19224332481166	0.193087814571866	NA	NA
HDL	RANTES	MR-Egger	494	0.167426649748182	0.0891512815843073	-0.00730665133264877	0.342159950829014	0.0603803319758409	-0.00270888046327148	0.175025245309599
HDL	RANTES	MR-PRESSO	494	0.0767154064645911	0.0589438985911673	-0.038812511882478	0.19224332481166	0.193087814571866	NA	0.781
HDL	RANTES	Weighted Median	494	-0.00495721179791552	0.101886724309273	-0.204651521946852	0.194737098351021	0.961194916896032	NA	NA
HDL	sCD40L	IVW-RE	496	0.0468122855688747	0.0494408143692935	-0.050089929961271	0.14371450109902	0.343722945377685	NA	NA
HDL	sCD40L	MR-Egger	496	0.0483382588217932	0.0755540098914769	-0.0997448794530845	0.196421397096671	0.522312931363574	-4.47938954347657e-05	0.978675029127355
HDL	sCD40L	MR-PRESSO	496	0.0468122855688747	0.0494408143692935	-0.050089929961271	0.14371450109902	0.343722945377685	NA	0.294
HDL	sCD40L	Weighted Median	496	-0.0394430573614577	0.0847357258281961	-0.205522028188582	0.126635913465667	0.64158546038782	NA	NA
HDL	SCF	IVW-RE	494	-0.0174459010290946	0.0403519398690056	-0.0965342498786715	0.0616424478204823	0.665491737670165	NA	NA
HDL	SCF	MR-Egger	494	0.0232405408797138	0.0611547469841326	-0.0966205606928456	0.143101642452273	0.703924330922055	-0.00121208828949514	0.375858235715589
HDL	SCF	MR-PRESSO	492	-0.0325759929573407	0.0396343813604037	-0.110259380423732	0.0451073945090505	0.411525635799485	NA	0.027
HDL	SCF	Weighted Median	494	-0.0433060081245446	0.0672294330496831	-0.17507327560297	0.088461259353881	0.519476541881417	NA	NA
HDL	SCGFb	IVW-RE	494	0.045167556190688	0.056798560084289	-0.0661555759482526	0.156490688329629	0.426483438198086	NA	NA
HDL	SCGFb	MR-Egger	494	0.287763281362768	0.0858537521301699	0.119493019250006	0.45603354347553	0.00080292473408683	-0.00723697602731691	0.000166963610252147
HDL	SCGFb	MR-PRESSO	494	0.045167556190688	0.056798560084289	-0.0661555759482526	0.156490688329629	0.426483438198086	NA	0.477
HDL	SCGFb	Weighted Median	494	0.15358530718852	0.0940616892964791	-0.0307722161575754	0.337942830534616	0.102507978471757	NA	NA
HDL	SDF1a	IVW-RE	494	0.0143768213486919	0.0400896474327231	-0.0641974437723539	0.0929510864697378	0.719881772013387	NA	NA
HDL	SDF1a	MR-Egger	494	0.0823505820827225	0.0606797938521926	-0.0365796284568899	0.201280792622335	0.174738790197499	-0.00202386311512834	0.136003128837951
HDL	SDF1a	MR-PRESSO	494	0.0143768213486919	0.0400896474327231	-0.0641974437723539	0.0929510864697378	0.719881772013387	NA	0.291
HDL	SDF1a	Weighted Median	494	0.0674824254933939	0.0664972391330616	-0.0628497682787543	0.197814619265542	0.310193808723518	NA	NA
HDL	SeSelectin	IVW-RE	495	0.00187909970586683	0.0947001437135898	-0.183729771303536	0.18748797071527	0.984168912488394	NA	NA
HDL	SeSelectin	MR-Egger	495	0.108129198673248	0.144217335175921	-0.174531584217899	0.390789981564396	0.453395882727256	-0.00313698883857879	0.328627015189289
HDL	SeSelectin	MR-PRESSO	492	0.0780707049376738	0.0495194806766123	-0.0189874771884862	0.175128887063834	0.11553958183883	NA	<0.001
HDL	SeSelectin	Weighted Median	495	0.0808034633194937	0.0814305921267372	-0.078797564488682	0.240404491127669	0.321051881536786	NA	NA
HDL	sICAM	IVW-RE	495	-0.0276218144961725	0.0578682454833423	-0.141041491492046	0.0857978624997011	0.633132505039985	NA	NA
HDL	sICAM	MR-Egger	495	0.029957090278413	0.0881096589931948	-0.142734668038354	0.20264884859518	0.733858184162361	-0.00170121918998885	0.38607032575462
HDL	sICAM	MR-PRESSO	494	-0.00388054249972652	0.0486713881875608	-0.0992764633473457	0.0915153783478926	0.936484797501503	NA	<0.001
HDL	sICAM	Weighted Median	495	0.029102180207864	0.0779736928391059	-0.123723449498372	0.1819278099141	0.708976708479725	NA	NA
HDL	sVCAM	IVW-RE	495	0.187654611791646	0.0556427685814683	0.0785967893718716	0.296712434211421	0.000744921260607225	NA	NA
HDL	sVCAM	MR-Egger	495	0.178884558944836	0.0847865384083888	0.012705997290572	0.3450631205991	0.0348736349545267	0.000259121602002251	0.890879319478854
HDL	sVCAM	MR-PRESSO	493	0.176995293408463	0.0517110238335628	0.0756416866946797	0.278348900122246	0.000671558656184882	NA	<0.001
HDL	sVCAM	Weighted Median	495	0.164863349016695	0.0814027978695774	0.00531679695152898	0.32440990108186	0.0428387589867412	NA	NA
HDL	TNFa	IVW-RE	497	-0.00349276849267967	0.0392262189156794	-0.0803747448170951	0.0733892078317358	0.929048784580005	NA	NA
HDL	TNFa	MR-Egger	497	0.0433526346856461	0.0606816021043539	-0.0755811199630775	0.16228638933437	0.474962572712089	-0.00132664442163616	0.311637066527744
HDL	TNFa	MR-PRESSO	497	-0.00349276849267967	0.0392262189156794	-0.0803747448170951	0.0733892078317358	0.929048784580005	NA	0.349
HDL	TNFa	Weighted Median	497	0.00684239254595353	0.0644137980832384	-0.119406331804629	0.133091116896536	0.915403382208855	NA	NA
HDL	TNFb	IVW-RE	488	0.0635446735442766	0.0901672476612426	-0.113179884456862	0.240269231545416	0.480970621816956	NA	NA
HDL	TNFb	MR-Egger	488	0.183921781344009	0.136308464980595	-0.0832379008058972	0.451081463493915	0.17723881301055	-0.00358962029741247	0.239110702051295
HDL	TNFb	MR-PRESSO	488	0.0635446735442766	0.0901672476612426	-0.113179884456862	0.240269231545416	0.480970621816956	NA	0.168
HDL	TNFb	Weighted Median	488	0.110561828266177	0.148129040855978	-0.179765756876002	0.400889413408356	0.455432700311524	NA	NA
HDL	TRAIL	IVW-RE	493	0.0405670107665778	0.042511209628986	-0.042753429045467	0.123887450578623	0.339948909013572	NA	NA
HDL	TRAIL	MR-Egger	493	0.135535456132219	0.0642239799592983	0.00965876846817196	0.261412143796266	0.034827710516304	-0.00283290402841413	0.0490359367914845
HDL	TRAIL	MR-PRESSO	487	0.0626461359951283	0.0386484439693312	-0.0131048141847608	0.138397086175017	0.105682824578135	NA	<0.001
HDL	TRAIL	Weighted Median	493	0.0773110252990311	0.067367833019256	-0.0547275011352189	0.209349551733281	0.251135568222169	NA	NA
HDL	VEGF	IVW-RE	497	0.064930840848176	0.0357572555728258	-0.00515209226055664	0.135013773956909	0.0693889724208315	NA	NA
HDL	VEGF	MR-Egger	497	0.189284116342423	0.0545158740524747	0.0824349666138512	0.296133266070995	0.00051641981571815	-0.00357451985976971	0.00266556699715492
HDL	VEGF	MR-PRESSO	495	0.0646305539961363	0.0347099769555915	-0.003401000836823	0.132662108829096	0.0631942971209029	NA	<0.001
HDL	VEGF	Weighted Median	497	0.140711056965636	0.0544883602669889	0.0339158332656946	0.247506280665578	0.00981141461571301	NA	NA
LDL	activePAI	IVW-RE	372	-0.0173297767306731	0.0531842442758522	-0.121568980056324	0.0869094265949778	0.744542246719042	NA	NA
LDL	activePAI	MR-Egger	372	-0.097641901906761	0.0795133836017425	-0.253485270055094	0.058201466241572	0.219449485083906	0.00286258395295435	0.174629046328521
LDL	activePAI	MR-PRESSO	372	-0.0173297767306731	0.0531842442758522	-0.121568980056324	0.0869094265949778	0.744542246719042	NA	0.023
LDL	activePAI	Weighted Median	372	-0.0160831821084272	0.0860209934753772	-0.184681231234521	0.152514867017667	0.851685640751048	NA	NA
LDL	bNGF	IVW-RE	372	-0.0441812619257067	0.0596442855091459	-0.161081913407257	0.0727193895558435	0.458847503028726	NA	NA
LDL	bNGF	MR-Egger	372	-0.156848220377282	0.0874540013620743	-0.328254913350864	0.0145584725963004	0.072893980758312	0.00413739608886293	0.0788706199704448
LDL	bNGF	MR-PRESSO	372	-0.0441812619257067	0.0596442855091459	-0.161081913407257	0.0727193895558435	0.458847503028726	NA	0.408
LDL	bNGF	Weighted Median	372	0.0536128134907811	0.10610586730132	-0.154350864968192	0.261576491949754	0.613364565009038	NA	NA
LDL	CRP	IVW-RE	377	-0.0684310252464318	0.0285401497110844	-0.124368690793539	-0.0124933596993251	0.0164978849706157	NA	NA
LDL	CRP	MR-Egger	377	-0.155695815704729	0.0406563402484318	-0.235380778334862	-0.0760108530745967	0.000128373591130382	0.00342118886860443	0.00284416886626193
LDL	CRP	MR-PRESSO	291	-0.00860604420795973	0.0124209049948198	-0.0329510179978066	0.0157389295818871	0.488947045070627	NA	<0.001
LDL	CRP	Weighted Median	377	-0.032341938234086	0.015267801123455	-0.0622662785591779	-0.00241759790899412	0.0341488087818239	NA	NA
LDL	CTACK	IVW-RE	373	-0.0735686375635327	0.0606492759195653	-0.192439034054313	0.0453017589272476	0.225123101405385	NA	NA
LDL	CTACK	MR-Egger	373	-0.00750765061501594	0.0892590463397175	-0.182452166735254	0.167436865505222	0.932968330610705	-0.00242697393208189	0.313113829283019
LDL	CTACK	MR-PRESSO	373	-0.0735686375635327	0.0606492759195653	-0.192439034054313	0.0453017589272476	0.225123101405385	NA	0.109
LDL	CTACK	Weighted Median	373	-0.0494418862858429	0.103598645702543	-0.252491500709953	0.153607728138267	0.633188010026796	NA	NA
LDL	Eotaxin	IVW-RE	368	0.0303574350415306	0.0414902164409268	-0.0509618948934576	0.111676764976519	0.464365768159202	NA	NA
LDL	Eotaxin	MR-Egger	368	0.0343714983597102	0.0613360470603823	-0.0858449448326929	0.154587941552113	0.575220222583955	-0.000146110927939676	0.929113722318687
LDL	Eotaxin	MR-PRESSO	368	0.0303574350415306	0.0414902164409268	-0.0509618948934576	0.111676764976519	0.464365768159202	NA	0.069
LDL	Eotaxin	Weighted Median	368	0.0467424976754923	0.0701516383083351	-0.0907521868653248	0.184237182216309	0.505215165441572	NA	NA
LDL	FGFBasic	IVW-RE	371	0.115753806622794	0.0490342616418505	0.0196484197962529	0.211859193449335	0.018241858755843	NA	NA
LDL	FGFBasic	MR-Egger	371	0.12024525538038	0.0721212053191896	-0.0211097095668498	0.261600220327611	0.0954614638783762	-0.000165066788322031	0.932243408243821
LDL	FGFBasic	MR-PRESSO	371	0.115753806622794	0.0490342616418505	0.0196484197962529	0.211859193449335	0.018241858755843	NA	0.177
LDL	FGFBasic	Weighted Median	371	0.114170643471675	0.0810174919477801	-0.0446207228637377	0.272962009807088	0.158773141364093	NA	NA
LDL	GCSF	IVW-RE	371	0.0578837228522629	0.0415841255505913	-0.0236196655554879	0.139387111260014	0.163932446801344	NA	NA
LDL	GCSF	MR-Egger	371	-0.012691339747065	0.0610588899305279	-0.132364564946895	0.106981885452765	0.835342900350518	0.00257462006758603	0.115071340220807
LDL	GCSF	MR-PRESSO	371	0.0578837228522629	0.0415841255505913	-0.0236196655554879	0.139387111260014	0.163932446801344	NA	0.133
LDL	GCSF	Weighted Median	371	-0.0353618587243738	0.0725974252582719	-0.177650197600925	0.106926480152177	0.626190854674036	NA	NA
LDL	GROa	IVW-RE	372	-0.0565321933057095	0.0600111406714986	-0.174151867693014	0.0610874810815945	0.346178147045501	NA	NA
LDL	GROa	MR-Egger	372	-0.078828121299762	0.0884265636851832	-0.252141001399359	0.0944847587998345	0.372686220596012	0.000821518665963057	0.731108177489196
LDL	GROa	MR-PRESSO	372	-0.0565321933057095	0.0600111406714986	-0.174151867693014	0.0610874810815945	0.346178147045501	NA	0.34
LDL	GROa	Weighted Median	372	-0.0382847632853133	0.103475728280817	-0.241093463989767	0.164523937419141	0.711391535771787	NA	NA
LDL	HGF	IVW-RE	369	0.0662305154888675	0.0425380900288123	-0.017142608938727	0.149603639916462	0.119477689416237	NA	NA
LDL	HGF	MR-Egger	369	-0.0306846363169841	0.0625567049312672	-0.153293524973767	0.0919242523397988	0.623773654907077	0.00352410162016177	0.035327419674698
LDL	HGF	MR-PRESSO	367	0.0527822663609208	0.0402172603596644	-0.0260435639440214	0.131608096665863	0.190198128078906	NA	0.011
LDL	HGF	Weighted Median	369	0.0801581481983738	0.0674114247352793	-0.0519658164293061	0.212282112826054	0.234404853290787	NA	NA
LDL	IFNg	IVW-RE	371	0.0633842379009982	0.0404837955492555	-0.0159625433330254	0.142731019135022	0.117426045050886	NA	NA
LDL	IFNg	MR-Egger	371	0.0205229513185016	0.0596170668163374	-0.0963243525054377	0.137370255142441	0.730661107554332	0.00156461873508054	0.327391755995634
LDL	IFNg	MR-PRESSO	371	0.0633842379009982	0.0404837955492555	-0.0159625433330254	0.142731019135022	0.117426045050886	NA	0.931
LDL	IFNg	Weighted Median	371	0.0160875323290623	0.0746220869836883	-0.130169070610182	0.162344135268307	0.829309894121977	NA	NA
LDL	IL10	IVW-RE	368	0.0461261007953159	0.040581888025799	-0.0334129381598875	0.125665139750519	0.255698049182606	NA	NA
LDL	IL10	MR-Egger	368	0.0381380119308277	0.0599903569020389	-0.0794409270168724	0.155716950878528	0.524948699220563	0.00028995920462192	0.856521376466919
LDL	IL10	MR-PRESSO	368	0.0461261007953159	0.040581888025799	-0.0334129381598875	0.125665139750519	0.255698049182606	NA	0.721
LDL	IL10	Weighted Median	368	0.0537350640794916	0.0683982323953284	-0.0803230080215527	0.187793136180536	0.43208976049014	NA	NA
LDL	IL12p70	IVW-RE	369	0.122461010395019	0.0391790585782339	0.0456714666334954	0.199250554156542	0.00177397385370915	NA	NA
LDL	IL12p70	MR-Egger	369	0.0998838081372525	0.0579044928958411	-0.0136069124816514	0.213374528756156	0.0845319608603383	0.000820179271333428	0.596445638119746
LDL	IL12p70	MR-PRESSO	369	0.122461010395019	0.0391790585782339	0.0456714666334954	0.199250554156542	0.00177397385370915	NA	0.682
LDL	IL12p70	Weighted Median	369	0.119140349664813	0.0694112321316312	-0.016903165435733	0.25518386476536	0.0860811866729748	NA	NA
LDL	IL13	IVW-RE	373	0.00594896919037006	0.0587720470058873	-0.109242126238864	0.121140064619604	0.919374975142497	NA	NA
LDL	IL13	MR-Egger	373	-0.0626364526355163	0.0864232405056511	-0.232022891453836	0.106749986182803	0.468596830644294	0.00252122925806568	0.279062840645161
LDL	IL13	MR-PRESSO	373	0.00594896919037006	0.0587720470058873	-0.109242126238864	0.121140064619604	0.919374975142497	NA	0.538
LDL	IL13	Weighted Median	373	-0.00963651397391544	0.101718483525239	-0.209001078245414	0.189728050297584	0.924523650291599	NA	NA
LDL	IL16	IVW-RE	372	0.0469021496692388	0.0615006513246291	-0.0736369119527898	0.167441211291267	0.445684980789057	NA	NA
LDL	IL16	MR-Egger	372	0.106177256533466	0.0906008808764003	-0.0713972069518825	0.283751720018814	0.241227970110739	-0.0021801236019449	0.372838186703683
LDL	IL16	MR-PRESSO	372	0.0469021496692388	0.0615006513246291	-0.0736369119527898	0.167441211291267	0.445684980789057	NA	0.143
LDL	IL16	Weighted Median	372	0.0476331957098854	0.0994304124722469	-0.147246831703681	0.242513223123452	0.63189549909132	NA	NA
LDL	IL17	IVW-RE	371	0.0732532868376127	0.0342673167498644	0.00609058016105241	0.140415993514173	0.0325409956602984	NA	NA
LDL	IL17	MR-Egger	371	0.0148957699854005	0.052288583317929	-0.0875879701203621	0.117379510091163	0.775739033434512	0.00197752722210218	0.139988383367187
LDL	IL17	MR-PRESSO	371	0.0732532868376127	0.0342673167498644	0.00609058016105241	0.140415993514173	0.0325409956602984	NA	0.199
LDL	IL17	Weighted Median	371	0.00449302135358229	0.0555924913366641	-0.104466259477134	0.113452302184299	0.93558458448318	NA	NA
LDL	IL18	IVW-RE	375	0.00820140408081864	0.0617349432086442	-0.11279686119575	0.129199669357387	0.894313075392219	NA	NA
LDL	IL18	MR-Egger	375	0.0152319361962959	0.0911140699614553	-0.163348359413019	0.193812231805611	0.867232859433479	-0.000257789841156529	0.91634946201536
LDL	IL18	MR-PRESSO	375	0.00820140408081864	0.0617349432086442	-0.11279686119575	0.129199669357387	0.894313075392219	NA	0.061
LDL	IL18	Weighted Median	375	0.0320383749893445	0.103286240706496	-0.170398936893922	0.234475686872611	0.756416356916198	NA	NA
LDL	IL1a	IVW-RE	371	0.0789506410558847	0.0578459900080884	-0.0344254160100324	0.192326698121802	0.172302691245825	NA	NA
LDL	IL1a	MR-Egger	371	0.115655670896692	0.0865875087870927	-0.0540527278370547	0.28536406963044	0.18164457222767	-0.00131121525766778	0.568604670758389
LDL	IL1a	MR-PRESSO	370	0.0822308653353936	0.057376043319446	-0.0302261795707205	0.194687910241508	0.152649787039405	NA	<0.001
LDL	IL1a	Weighted Median	371	0.0951337898198309	0.0857639547795643	-0.072960472719837	0.263228052359499	0.267321729838575	NA	NA
LDL	IL1b	IVW-RE	373	0.047218723377593	0.0433439348018177	-0.0377338277822219	0.132171274537408	0.275979150368242	NA	NA
LDL	IL1b	MR-Egger	373	0.0455086316930445	0.0674742926911385	-0.0867385518639011	0.17775581524999	0.500019659267189	5.62329880795749e-05	0.973593927064574
LDL	IL1b	MR-PRESSO	373	0.047218723377593	0.0433439348018177	-0.0377338277822219	0.132171274537408	0.275979150368242	NA	0.218
LDL	IL1b	Weighted Median	373	0.114832753996037	0.0705111164553832	-0.0233664947662236	0.253032002758298	0.103402682157565	NA	NA
LDL	IL1RA	IVW-RE	8	-0.114778959561932	0.196465334878501	-0.499843940134396	0.270286021010531	0.55907237028765	NA	NA
LDL	IL1RA	MR-PRESSO	NA	NA	NA	NA	NA	NA	NA	0.535
LDL	IL1RA	Weighted Median	8	-0.135749774872521	0.186562540116865	-0.501405634365884	0.229906084620842	0.46683593034992	NA	NA
LDL	IL2	IVW-RE	371	0.0538457450785414	0.0594984913110332	-0.0627691550255531	0.170460645182636	0.365468855825572	NA	NA
LDL	IL2	MR-Egger	371	0.0282654220496065	0.0874482199514383	-0.143129939567349	0.199660783666562	0.746525098731819	0.000942327356810495	0.689781898509278
LDL	IL2	MR-PRESSO	371	0.0538457450785414	0.0594984913110332	-0.0627691550255531	0.170460645182636	0.365468855825572	NA	0.531
LDL	IL2	Weighted Median	371	0.0300522884514252	0.106312974507735	-0.17831731267306	0.23842188957591	0.777424046726844	NA	NA
LDL	IL2ra	IVW-RE	372	-0.0275032826602539	0.0580119798841899	-0.141204673905128	0.0861981085846204	0.63543102012454	NA	NA
LDL	IL2ra	MR-Egger	372	0.0555831830131671	0.0853967073017218	-0.111791287696516	0.22295765372285	0.515122636237724	-0.00304456737835194	0.184895505429146
LDL	IL2ra	MR-PRESSO	372	-0.0275032826602539	0.0580119798841899	-0.141204673905128	0.0861981085846204	0.63543102012454	NA	0.906
LDL	IL2ra	Weighted Median	372	0.0121238809532185	0.0975481160215756	-0.179066913208804	0.203314675115241	0.901088703450358	NA	NA
LDL	IL4	IVW-RE	370	0.10728652455936	0.034700769659555	0.0392742657908125	0.175298783327908	0.00198972239268472	NA	NA
LDL	IL4	MR-Egger	370	0.0441028933582496	0.052818431895971	-0.0594193308777352	0.147625117594234	0.403723009315185	0.00214836869541871	0.113130924786484
LDL	IL4	MR-PRESSO	370	0.10728652455936	0.034700769659555	0.0392742657908125	0.175298783327908	0.00198972239268472	NA	0.071
LDL	IL4	Weighted Median	370	0.0798827333645237	0.056915795274818	-0.0316701755255746	0.191435642254622	0.160460385296747	NA	NA
LDL	IL5	IVW-RE	374	0.00799232275549501	0.0603618690437616	-0.110314766609801	0.126299412120791	0.894662525491398	NA	NA
LDL	IL5	MR-Egger	374	-0.0660081501026657	0.0888017575240121	-0.240056396613588	0.108040096408257	0.45728777696501	0.0027255203036673	0.255890058603885
LDL	IL5	MR-PRESSO	374	0.00799232275549501	0.0603618690437616	-0.110314766609801	0.126299412120791	0.894662525491398	NA	0.747
LDL	IL5	Weighted Median	374	-0.100383407247031	0.102195406036923	-0.300682722464847	0.0999159079707853	0.325967207750884	NA	NA
LDL	IL6	IVW-RE	371	0.122126479106148	0.0362815227789149	0.0510160011552056	0.193236957057091	0.000762448141778588	NA	NA
LDL	IL6	MR-Egger	371	0.0869545848418774	0.0553986424995513	-0.0216247592496531	0.195533928933408	0.116504519308292	0.00119604650600711	0.400694542761142
LDL	IL6	MR-PRESSO	368	0.115437537394323	0.0349542838186492	0.046927141109771	0.183947933678876	0.00105231646142597	NA	<0.001
LDL	IL6	Weighted Median	371	0.108426709706334	0.057183293965758	-0.00365048698391805	0.220503906396587	0.0579434332840387	NA	NA
LDL	IL7	IVW-RE	374	0.000639070364870257	0.0599150796112013	-0.116792327803934	0.118070468533675	0.991489709897854	NA	NA
LDL	IL7	MR-Egger	374	-0.0570582788542704	0.0880527587232357	-0.229638514691207	0.115521956982667	0.516984280367329	0.00212472743915117	0.371222167841567
LDL	IL7	MR-PRESSO	374	0.000639070364870257	0.0599150796112013	-0.116792327803934	0.118070468533675	0.991489709897854	NA	0.916
LDL	IL7	Weighted Median	374	-0.0622137583653608	0.103284839240841	-0.264648323426419	0.140220806695697	0.546940312174405	NA	NA
LDL	IL8	IVW-RE	372	0.0168382144533552	0.0414316956728257	-0.0643664168838071	0.0980428457905176	0.68444210000729	NA	NA
LDL	IL8	MR-Egger	372	-0.0898796079339653	0.0643644110667374	-0.216031535510902	0.0362723196429712	0.162588724366508	0.00352292239615085	0.0302670303525097
LDL	IL8	MR-PRESSO	372	0.0168382144533552	0.0414316956728257	-0.0643664168838071	0.0980428457905176	0.68444210000729	NA	0.665
LDL	IL8	Weighted Median	372	0.0441203027231977	0.0683780381560021	-0.0898981893960721	0.178138794842467	0.518771124547718	NA	NA
LDL	IL9	IVW-RE	370	-0.0489397957173372	0.0583495052843782	-0.163302724590448	0.0654231331557737	0.401617808023813	NA	NA
LDL	IL9	MR-Egger	370	-0.0160170535661036	0.085971501145325	-0.184518099507784	0.152483992375577	0.852204373155145	-0.00121197359612705	0.601754063928183
LDL	IL9	MR-PRESSO	370	-0.0489397957173372	0.0583495052843782	-0.163302724590448	0.0654231331557737	0.401617808023813	NA	0.488
LDL	IL9	Weighted Median	370	-0.0744816465482807	0.100149428655899	-0.270770919786107	0.121807626689546	0.457054868963148	NA	NA
LDL	IP10	IVW-RE	371	0.0142566535442404	0.0447226640257663	-0.0733981572389467	0.101911464327427	0.749893977746735	NA	NA
LDL	IP10	MR-Egger	371	-0.0012209054788578	0.0695490801804126	-0.137534597790355	0.135092786832639	0.985994184264243	0.000508673303188443	0.771172704302809
LDL	IP10	MR-PRESSO	368	0.00438944368814483	0.0403035126723361	-0.0746054411496339	0.0833843285259235	0.91333363054436	NA	0.017
LDL	IP10	Weighted Median	371	-0.0603498504097475	0.068849644542312	-0.195292674061064	0.0745929732415687	0.380733518365877	NA	NA
LDL	MCP1	IVW-RE	370	0.0461329618773381	0.0360798839038868	-0.0245823111406664	0.116848234895343	0.201026014129352	NA	NA
LDL	MCP1	MR-Egger	370	0.00869305865059081	0.0550857222632864	-0.0992729730478267	0.116659090349008	0.87460679291198	0.00127265683671461	0.368321460842152
LDL	MCP1	MR-PRESSO	368	0.0525882681133335	0.0350699598056559	-0.016148853105752	0.121325389332419	0.134597297691624	NA	0.002
LDL	MCP1	Weighted Median	370	0.0559209898213397	0.0576478337936718	-0.0570666882010081	0.168908667843688	0.332024089026517	NA	NA
LDL	MCP3	IVW-RE	368	-0.0128285669078602	0.110352721066868	-0.229115925794916	0.203458791979196	0.907453958024045	NA	NA
LDL	MCP3	MR-Egger	368	0.188246963887602	0.162515740939977	-0.130278035275595	0.506771963050798	0.246729127947819	-0.00729111666655321	0.0926018217130029
LDL	MCP3	MR-PRESSO	368	-0.0128285669078602	0.110352721066868	-0.229115925794916	0.203458791979196	0.907453958024045	NA	0.204
LDL	MCP3	Weighted Median	368	0.0475704277343916	0.184829860961956	-0.314689443018588	0.409830298487372	0.796889958809849	NA	NA
LDL	MCSF	IVW-RE	369	-0.0522533229793667	0.0727297254645715	-0.194800965495412	0.090294319536679	0.472474343455505	NA	NA
LDL	MCSF	MR-Egger	369	-0.0703055358740024	0.105885843384899	-0.277837975381052	0.137226903633048	0.506706414666019	0.000677217406750973	0.814325904925082
LDL	MCSF	MR-PRESSO	369	-0.0522533229793667	0.0727297254645715	-0.194800965495412	0.090294319536679	0.472474343455505	NA	0.134
LDL	MCSF	Weighted Median	369	-0.0374218818923916	0.117276773768756	-0.267280134702206	0.192436370917423	0.749658032725569	NA	NA
LDL	MIF	IVW-RE	372	-0.0961113098142895	0.0605809537137112	-0.214847797242251	0.0226251776136725	0.112627328680445	NA	NA
LDL	MIF	MR-Egger	372	-0.0100029318128358	0.08909130570221	-0.184618682324815	0.164612818699144	0.910603535018081	-0.00315470756508105	0.187819396093042
LDL	MIF	MR-PRESSO	372	-0.0961113098142895	0.0605809537137112	-0.214847797242251	0.0226251776136725	0.112627328680445	NA	0.307
LDL	MIF	Weighted Median	372	-0.104908228877173	0.0997314792161275	-0.300378336265688	0.0905618785113418	0.292842276283503	NA	NA
LDL	MIG	IVW-RE	371	0.00179567922758043	0.059701426369822	-0.11521696628294	0.118808324738101	0.97600511708961	NA	NA
LDL	MIG	MR-Egger	371	0.0828200365026462	0.0877493405687142	-0.089165510679173	0.254805583684465	0.345258994832442	-0.00297430515687151	0.208008633780863
LDL	MIG	MR-PRESSO	371	0.00179567922758043	0.059701426369822	-0.11521696628294	0.118808324738101	0.97600511708961	NA	0.201
LDL	MIG	Weighted Median	371	0.0683973320730187	0.0988674038780478	-0.125379218772931	0.262173882918968	0.489057460130654	NA	NA
LDL	MIP1a	IVW-RE	373	0.00944803779643668	0.0598933744468029	-0.107940819031868	0.126836894624742	0.874655668013908	NA	NA
LDL	MIP1a	MR-Egger	373	-0.0175596396966055	0.0882289934848614	-0.190485289319153	0.155366009925942	0.842244392002539	0.000992442548259802	0.67647618941981
LDL	MIP1a	MR-PRESSO	373	0.00944803779643668	0.0598933744468029	-0.107940819031868	0.126836894624742	0.874655668013908	NA	0.309
LDL	MIP1a	Weighted Median	373	-0.0314359512708812	0.101844438029209	-0.231047381833852	0.168175479292089	0.757575341121669	NA	NA
LDL	MIP1b	IVW-RE	370	0.0498657588208508	0.0428098414076469	-0.0340399885220085	0.13377150616371	0.244091867564782	NA	NA
LDL	MIP1b	MR-Egger	370	0.0300297666419605	0.0633006885574683	-0.094037303127264	0.154096836411185	0.635215594220742	0.000721580389167419	0.670256126573561
LDL	MIP1b	MR-PRESSO	368	0.0628714770898662	0.0419965223228918	-0.0194417066630017	0.145184660842734	0.135236146324131	NA	0.005
LDL	MIP1b	Weighted Median	370	0.0748660537517129	0.0766962869551889	-0.0754559064284065	0.225188013931832	0.328996769926209	NA	NA
LDL	PDGFbb	IVW-RE	369	0.0674554591455672	0.0410019804575457	-0.0129069458460375	0.147817864137172	0.0999335970278008	NA	NA
LDL	PDGFbb	MR-Egger	369	0.00580643302957804	0.0605084904041104	-0.112788028921366	0.124400894980522	0.923551838689082	0.00224055352917424	0.166370199815358
LDL	PDGFbb	MR-PRESSO	369	0.0674554591455672	0.0410019804575457	-0.0129069458460375	0.147817864137172	0.0999335970278008	NA	0.096
LDL	PDGFbb	Weighted Median	369	-0.0184661381571058	0.0744192519951837	-0.164325191824076	0.127392915509865	0.804028739113849	NA	NA
LDL	RANTES	IVW-RE	373	-0.0146406914874281	0.0609571798682361	-0.134114568628301	0.104833185653445	0.810190768167027	NA	NA
LDL	RANTES	MR-Egger	373	-0.0901774596891233	0.0898396393487737	-0.266259917196787	0.0859049978185405	0.315494183872356	0.00276767076806184	0.252552158890185
LDL	RANTES	MR-PRESSO	373	-0.0146406914874281	0.0609571798682361	-0.134114568628301	0.104833185653445	0.810190768167027	NA	0.37
LDL	RANTES	Weighted Median	373	-0.0276739565351791	0.100562848898833	-0.224773518559634	0.169425605489276	0.783169764014035	NA	NA
LDL	sCD40L	IVW-RE	371	0.0123232770194157	0.0536695653673311	-0.0928671381664713	0.117513692205303	0.818391822120093	NA	NA
LDL	sCD40L	MR-Egger	371	-0.0545839286663796	0.0802123626039821	-0.211797270485052	0.102629413152293	0.496192530965747	0.00239281896783465	0.261837595644056
LDL	sCD40L	MR-PRESSO	369	0.033749786130185	0.0522251366920959	-0.068611481786323	0.136111054046693	0.518529044773354	NA	0.039
LDL	sCD40L	Weighted Median	371	0.0189180898165485	0.0851103841130412	-0.147895197755382	0.185731377388479	0.824098173600901	NA	NA
LDL	SCF	IVW-RE	370	0.0109668481562946	0.041691473597259	-0.0707469385567356	0.0926806348693248	0.792513778567576	NA	NA
LDL	SCF	MR-Egger	370	0.043827164676098	0.0616224259007303	-0.0769505707293216	0.164604900081518	0.476947284138874	-0.00119529362891524	0.468731843185608
LDL	SCF	MR-PRESSO	369	0.043239760590103	0.0407246031469116	-0.0365804615778437	0.12305998275805	0.289040877625587	NA	0.033
LDL	SCF	Weighted Median	370	0.103134573789404	0.0691029168649953	-0.032304654492652	0.238573802071461	0.135573915939476	NA	NA
LDL	SCGFb	IVW-RE	372	-0.0839998175147749	0.0597489055895431	-0.201105520585963	0.0331058855564135	0.159759631284037	NA	NA
LDL	SCGFb	MR-Egger	372	-0.174118166447603	0.087831083953896	-0.346263927720353	-0.00197240517485284	0.0474321651355685	0.00330338524999767	0.162019253929987
LDL	SCGFb	MR-PRESSO	372	-0.0839998175147749	0.0597489055895431	-0.201105520585963	0.0331058855564135	0.159759631284037	NA	0.187
LDL	SCGFb	Weighted Median	372	-0.184133578538834	0.0981505132851173	-0.376505049641784	0.00823789256411611	0.0606507813146496	NA	NA
LDL	SDF1a	IVW-RE	369	0.102565338702749	0.0403861173711912	0.0234100031798069	0.181720674225691	0.0110973382559008	NA	NA
LDL	SDF1a	MR-Egger	369	0.0694463129010274	0.0596734627484874	-0.0475115249188003	0.186404150720855	0.244516369058192	0.00120410447774435	0.450911101737729
LDL	SDF1a	MR-PRESSO	369	0.102565338702749	0.0403861173711912	0.0234100031798069	0.181720674225691	0.0110973382559008	NA	0.951
LDL	SDF1a	Weighted Median	369	0.0484617802316893	0.0694456509480195	-0.0876491945093688	0.184572754972747	0.485278817229245	NA	NA
LDL	SeSelectin	IVW-RE	371	-0.106129867801207	0.110594735024623	-0.322891565329219	0.110631829726805	0.33724218304691	NA	NA
LDL	SeSelectin	MR-Egger	371	-0.190159364972256	0.165741536026827	-0.515006806327185	0.134688076382672	0.251247432187641	0.0029958392842033	0.495813353247749
LDL	SeSelectin	MR-PRESSO	368	0.154738404451308	0.0556322392208033	0.0456992155785332	0.263777593324082	0.00569092440217121	NA	<0.001
LDL	SeSelectin	Weighted Median	371	0.268319136556752	0.081014724044353	0.109533195212369	0.427105077901136	0.000926382059557422	NA	NA
LDL	sICAM	IVW-RE	371	-0.119103567241195	0.0650277042108062	-0.246555525491699	0.00834839100930825	0.06701373271697	NA	NA
LDL	sICAM	MR-Egger	371	-0.135756390597593	0.0976701412936502	-0.327186349898086	0.0556735687028994	0.164544752134346	0.000589161814947727	0.819067728443138
LDL	sICAM	MR-PRESSO	369	-0.0355202762600405	0.0537107848557131	-0.140793414577238	0.0697528620571573	0.50881784721855	NA	<0.001
LDL	sICAM	Weighted Median	371	-0.011405847208536	0.0843078346456352	-0.176646166728539	0.153834472311467	0.892384089236612	NA	NA
LDL	sVCAM	IVW-RE	371	-0.0981255204912465	0.0574297621529928	-0.210685785951814	0.0144347449693207	0.0875217479008085	NA	NA
LDL	sVCAM	MR-Egger	371	-0.104214835778461	0.0859753448956336	-0.272723415332312	0.0642937437753908	0.22545576180827	0.000217724278315625	0.924094994532397
LDL	sVCAM	MR-PRESSO	366	-0.0734696334278552	0.0507567334063418	-0.172952830904285	0.0260135640485748	0.148619339327279	NA	<0.001
LDL	sVCAM	Weighted Median	371	-0.0691507060060481	0.0798757965384855	-0.225704390457929	0.0874029784458326	0.386639393368706	NA	NA
LDL	TNFa	IVW-RE	374	0.0558605869915913	0.041320791197016	-0.0251266755672598	0.136847849550442	0.176414978050958	NA	NA
LDL	TNFa	MR-Egger	374	-0.0235255141781665	0.064199977116657	-0.14935515713511	0.102304128778777	0.7140359100473	0.00261449648535798	0.106163623381611
LDL	TNFa	MR-PRESSO	374	0.0558605869915913	0.041320791197016	-0.0251266755672598	0.136847849550442	0.176414978050958	NA	0.52
LDL	TNFa	Weighted Median	374	0.057317002790439	0.0678372211105989	-0.0756415073976151	0.190275512978493	0.398155688669408	NA	NA
LDL	TNFb	IVW-RE	370	0.0514009993202697	0.0902822205454097	-0.125548901393035	0.228350900033575	0.569127531609382	NA	NA
LDL	TNFb	MR-Egger	370	0.246654788469649	0.131153020645636	-0.0104004084594353	0.503709985398734	0.0600176147724865	-0.00720948445286969	0.0408959730591609
LDL	TNFb	MR-PRESSO	370	0.0514009993202697	0.0902822205454097	-0.125548901393035	0.228350900033575	0.569127531609382	NA	0.31
LDL	TNFb	Weighted Median	370	-0.02933242789811	0.156721106180781	-0.336500151629718	0.277835295833498	0.851532656289504	NA	NA
LDL	TRAIL	IVW-RE	371	-0.0707257749118871	0.0409684268137827	-0.151022415970166	0.0095708661463919	0.0842847667755333	NA	NA
LDL	TRAIL	MR-Egger	371	-0.167966096492982	0.0602974670219548	-0.286146960215005	-0.0497852327709593	0.00534247330379256	0.00353570717413107	0.0286391772366805
LDL	TRAIL	MR-PRESSO	371	-0.0707257749118871	0.0409684268137827	-0.151022415970166	0.0095708661463919	0.0842847667755333	NA	0.113
LDL	TRAIL	Weighted Median	371	-0.0895207834872673	0.0735435552040703	-0.233663502982278	0.0546219360077436	0.223509675852868	NA	NA
LDL	VEGF	IVW-RE	372	0.0351639251019497	0.0367252183241746	-0.0368161801378029	0.107144030341702	0.33832142268654	NA	NA
LDL	VEGF	MR-Egger	372	0.035447036197493	0.0562535168191802	-0.0748078307718184	0.145701903166804	0.52860944424033	-9.55960824542496e-06	0.994693525319795
LDL	VEGF	MR-PRESSO	371	0.0311021785915438	0.0362313091370133	-0.0399111873170023	0.10211554450009	0.391208751815595	NA	0.021
LDL	VEGF	Weighted Median	372	0.0132601192816897	0.0572517631338686	-0.0989512745121107	0.12547151307549	0.816840418519779	NA	NA
SBP	activePAI	IVW-RE	194	0.11337289149998	0.087453468056878	-0.0580327562146247	0.284778539214585	0.194844738496728	NA	NA
SBP	activePAI	MR-Egger	194	-0.0271373749275853	0.280935070915428	-0.57775999591603	0.52348524606086	0.923046750297517	0.0565095006128277	0.598604504276439
SBP	activePAI	MR-PRESSO	194	0.11337289149998	0.087453468056878	-0.0580327562146247	0.284778539214585	0.194844738496728	NA	0.083
SBP	activePAI	Weighted Median	194	0.124281222434544	0.126902048973207	-0.12444222311728	0.373004667986368	0.327408237850186	NA	NA
SBP	bNGF	IVW-RE	194	0.103114066652791	0.0999256155624162	-0.0927365409825396	0.298964674288122	0.302115102822113	NA	NA
SBP	bNGF	MR-Egger	194	0.413350843892541	0.323060539489934	-0.219836178333811	1.04653786611889	0.200726613109896	-0.124452152915353	0.31258141088349
SBP	bNGF	MR-PRESSO	194	0.103114066652791	0.0999256155624162	-0.0927365409825396	0.298964674288122	0.302115102822113	NA	0.413
SBP	bNGF	Weighted Median	194	0.141701749937266	0.151547046541927	-0.155325003248326	0.438728503122858	0.3497704076688	NA	NA
SBP	CRP	IVW-RE	186	0.0811727890328171	0.023374040043096	0.0353605123751519	0.126985065690482	0.000515106409930484	NA	NA
SBP	CRP	MR-Egger	186	-0.127201518780993	0.0708617390302773	-0.266087975162213	0.0116849376002264	0.072643139311152	0.0834485565621964	0.00189346760952325
SBP	CRP	MR-PRESSO	169	0.0702598089185158	0.0181245190832921	0.0347357515152634	0.105783866321768	0.000151753961262315	NA	<0.001
SBP	CRP	Weighted Median	186	0.0463998028247167	0.0194261986259532	0.00832515316132708	0.0844744524881064	0.0169165324003002	NA	NA
SBP	CTACK	IVW-RE	195	-0.0408561789081978	0.0972338751912899	-0.231431072360389	0.149718714543993	0.674350589263052	NA	NA
SBP	CTACK	MR-Egger	195	0.0941043059149264	0.313422885762963	-0.520193262111092	0.708401873940945	0.763988696834699	-0.0542017847482473	0.65058469317806
SBP	CTACK	MR-PRESSO	195	-0.0408561789081978	0.0972338751912899	-0.231431072360389	0.149718714543993	0.674350589263052	NA	0.715
SBP	CTACK	Weighted Median	195	-0.0166906411453694	0.146780894663771	-0.304375908304928	0.270994626014189	0.909466682618562	NA	NA
SBP	Eotaxin	IVW-RE	195	0.044394901803141	0.0652182245103168	-0.0834304693727275	0.172220272979009	0.496053025992403	NA	NA
SBP	Eotaxin	MR-Egger	195	0.0376821140518344	0.210246795592328	-0.374394033174083	0.449758261277752	0.857758673737952	0.00269757315551081	0.973208234868277
SBP	Eotaxin	MR-PRESSO	195	0.044394901803141	0.0652182245103168	-0.0834304693727275	0.172220272979009	0.496053025992403	NA	0.821
SBP	Eotaxin	Weighted Median	195	-0.0512853092938043	0.0991150326452191	-0.245547203604945	0.142976585017337	0.604854487382016	NA	NA
SBP	FGFBasic	IVW-RE	195	0.0910870795028766	0.0831733336345876	-0.0719296588950489	0.254103817900802	0.273451963185663	NA	NA
SBP	FGFBasic	MR-Egger	195	-0.0826676435833278	0.267838606019912	-0.607621665051768	0.442286377885113	0.757589890100092	0.0699359040925928	0.494878745497403
SBP	FGFBasic	MR-PRESSO	195	0.0910870795028766	0.0831733336345876	-0.0719296588950489	0.254103817900802	0.273451963185663	NA	0.154
SBP	FGFBasic	Weighted Median	195	0.0677729361277898	0.120489985400976	-0.168383095755879	0.303928968011459	0.573790557617936	NA	NA
SBP	GCSF	IVW-RE	195	0.0882742599610317	0.0674434767251392	-0.0439125254124065	0.22046104533447	0.190580818683201	NA	NA
SBP	GCSF	MR-Egger	195	0.0991651428401775	0.217840514909901	-0.327794420756889	0.526124706437244	0.648951687847901	-0.00437706388779768	0.95805660171941
SBP	GCSF	MR-PRESSO	195	0.0882742599610317	0.0674434767251392	-0.0439125254124065	0.22046104533447	0.190580818683201	NA	0.36
SBP	GCSF	Weighted Median	195	0.0259730557052679	0.0987124609804543	-0.167499812641738	0.219445924052274	0.792459393292349	NA	NA
SBP	GROa	IVW-RE	195	-0.0353834699207887	0.0992382946477851	-0.229886953317621	0.159120013476044	0.721428292205936	NA	NA
SBP	GROa	MR-Egger	195	-0.274007360422678	0.317263716771867	-0.895832818896853	0.347818098051497	0.387775769207674	0.0960393714617927	0.428438700643374
SBP	GROa	MR-PRESSO	195	-0.0353834699207887	0.0992382946477851	-0.229886953317621	0.159120013476044	0.721428292205936	NA	0.896
SBP	GROa	Weighted Median	195	0.109360217568126	0.151439558369747	-0.18745586267123	0.406176297807482	0.470209808680292	NA	NA
SBP	HGF	IVW-RE	195	0.117693727953798	0.0646830501805367	-0.00908272081025056	0.244470176717847	0.0688283064986745	NA	NA
SBP	HGF	MR-Egger	195	0.199608741734469	0.208477868578668	-0.209000372253396	0.608217855722333	0.338336284166933	-0.0329198173495408	0.679374836769353
SBP	HGF	MR-PRESSO	195	0.117693727953798	0.0646830501805367	-0.00908272081025056	0.244470176717847	0.0688283064986745	NA	0.673
SBP	HGF	Weighted Median	195	-0.00977033781157609	0.0994469888009481	-0.204682854232392	0.18514217860924	0.921736405862647	NA	NA
SBP	IFNg	IVW-RE	195	0.0916956302977793	0.0723279568112803	-0.0500645601276986	0.233455820723257	0.204878041523964	NA	NA
SBP	IFNg	MR-Egger	195	0.0870358439241938	0.233493313020642	-0.370602640227201	0.544674328075589	0.709330657272412	0.0018734468210902	0.983249650535814
SBP	IFNg	MR-PRESSO	195	0.0916956302977793	0.0723279568112803	-0.0500645601276986	0.233455820723257	0.204878041523964	NA	0.064
SBP	IFNg	Weighted Median	195	0.00436942188361716	0.102270687631507	-0.196077442548283	0.204816286315517	0.965921477452843	NA	NA
SBP	IL10	IVW-RE	195	0.052724822718385	0.0670520156677907	-0.0786947130813002	0.18414435851807	0.431675830133019	NA	NA
SBP	IL10	MR-Egger	195	-0.0309305439902374	0.216040320193253	-0.454361790777514	0.392500702797039	0.886155734532988	0.0336215678684385	0.683760627667748
SBP	IL10	MR-PRESSO	195	0.052724822718385	0.0670520156677907	-0.0786947130813002	0.18414435851807	0.431675830133019	NA	0.56
SBP	IL10	Weighted Median	195	0.0166939513233491	0.101865358416219	-0.182958482444705	0.216346385091403	0.869823630494649	NA	NA
SBP	IL12p70	IVW-RE	195	0.0209176366642066	0.0665300148659927	-0.109478796364053	0.151314069692467	0.753210407551166	NA	NA
SBP	IL12p70	MR-Egger	195	-0.127298590590837	0.214611879391201	-0.547930144852045	0.293332963670372	0.553075924529159	0.0595590984489611	0.467529486032626
SBP	IL12p70	MR-PRESSO	195	0.0209176366642066	0.0665300148659927	-0.109478796364053	0.151314069692467	0.753210407551166	NA	0.297
SBP	IL12p70	Weighted Median	195	-0.0552352893221379	0.0985854399343548	-0.24845920099351	0.137988622349234	0.575289580534712	NA	NA
SBP	IL13	IVW-RE	195	0.0694144860354347	0.0999929237892585	-0.12656804330037	0.26539701537124	0.487560565525635	NA	NA
SBP	IL13	MR-Egger	195	-0.0249868681227455	0.320466820329369	-0.653090294208378	0.603116557962887	0.937851742748703	0.0379926818055102	0.756460307379998
SBP	IL13	MR-PRESSO	195	0.0694144860354347	0.0999929237892585	-0.12656804330037	0.26539701537124	0.487560565525635	NA	0.396
SBP	IL13	Weighted Median	195	0.00451217336933493	0.153122710028781	-0.295602823502246	0.304627170240916	0.976491583128331	NA	NA
SBP	IL16	IVW-RE	195	-0.0821719528461642	0.10800209568636	-0.293852170646277	0.129508264953949	0.446754639752768	NA	NA
SBP	IL16	MR-Egger	195	0.0477352882380989	0.345898753163963	-0.630213810260578	0.725684386736776	0.890237537961499	-0.0522993408795357	0.692531247664941
SBP	IL16	MR-PRESSO	195	-0.0821719528461642	0.10800209568636	-0.293852170646277	0.129508264953949	0.446754639752768	NA	0.046
SBP	IL16	Weighted Median	195	-0.109455083934757	0.155328966471643	-0.413894263975007	0.194984096105494	0.481017944786488	NA	NA
SBP	IL17	IVW-RE	195	0.00400669539686137	0.054556046800734	-0.102921191471459	0.110934582265182	0.941454539473949	NA	NA
SBP	IL17	MR-Egger	195	-0.0699179017585868	0.178002055315261	-0.418795519350605	0.278959715833432	0.69447262232556	0.029536696469562	0.662550678068359
SBP	IL17	MR-PRESSO	195	0.00400669539686137	0.054556046800734	-0.102921191471459	0.110934582265182	0.941454539473949	NA	0.213
SBP	IL17	Weighted Median	195	0.0063779879005337	0.0811237992759702	-0.152621736969424	0.165377712770492	0.937334537848713	NA	NA
SBP	IL18	IVW-RE	195	-0.00258555077583177	0.0973212831229281	-0.193331760625997	0.188160659074333	0.978804960995062	NA	NA
SBP	IL18	MR-Egger	195	0.364763517846596	0.313673870326663	-0.25002597088495	0.979553006578141	0.244880201371634	-0.147512007137825	0.217982106036906
SBP	IL18	MR-PRESSO	195	-0.00258555077583177	0.0973212831229281	-0.193331760625997	0.188160659074333	0.978804960995062	NA	0.787
SBP	IL18	Weighted Median	195	-0.0427476794652413	0.14639407711707	-0.329674798164678	0.244179439234195	0.770283443575881	NA	NA
SBP	IL1a	IVW-RE	194	0.0970340780339062	0.0850252552844024	-0.0696123600998464	0.263680516167659	0.25377076899284	NA	NA
SBP	IL1a	MR-Egger	194	0.273214817988438	0.273129777990177	-0.26210970997773	0.808539345954605	0.31715985430364	-0.0708380988957232	0.497218307263864
SBP	IL1a	MR-PRESSO	194	0.0970340780339062	0.0850252552844024	-0.0696123600998464	0.263680516167659	0.25377076899284	NA	0.319
SBP	IL1a	Weighted Median	194	0.03937685027918	0.129845208367067	-0.215115081685371	0.293868782243731	0.761691771703686	NA	NA
SBP	IL1b	IVW-RE	195	0.0958997206457965	0.0715986193236856	-0.0444309945714208	0.236230435863014	0.180438081256966	NA	NA
SBP	IL1b	MR-Egger	195	0.384561742491554	0.234406117170377	-0.0748658049182602	0.843989289901369	0.100884846725056	-0.114955923922369	0.195997942562337
SBP	IL1b	MR-PRESSO	195	0.0958997206457965	0.0715986193236856	-0.0444309945714208	0.236230435863014	0.180438081256966	NA	0.03
SBP	IL1b	Weighted Median	195	0.17396124665176	0.100427808836891	-0.0228736417148184	0.370796135018339	0.0832376113587719	NA	NA
SBP	IL1RA	IVW-RE	195	0.0987384567462024	0.0644342203510713	-0.0275502945138151	0.22502720800622	0.125425833941075	NA	NA
SBP	IL1RA	MR-Egger	195	0.320323292094258	0.211109146720679	-0.0934430322852541	0.734089616473771	0.12918213181881	-0.0882740150726973	0.270367331844169
SBP	IL1RA	MR-PRESSO	195	0.0987384567462024	0.0644342203510713	-0.0275502945138151	0.22502720800622	0.125425833941075	NA	0.679
SBP	IL1RA	Weighted Median	195	0.0574094247043452	0.0977667008153123	-0.13420978778097	0.24902863718966	0.557063773883204	NA	NA
SBP	IL2	IVW-RE	195	0.100039849549329	0.106177338065995	-0.108063909034355	0.308143608133014	0.346092367348554	NA	NA
SBP	IL2	MR-Egger	195	0.188893789886063	0.34307471423301	-0.483520294017008	0.861307873789134	0.581914199949088	-0.0356780412029256	0.785288069188651
SBP	IL2	MR-PRESSO	195	0.100039849549329	0.106177338065995	-0.108063909034355	0.308143608133014	0.346092367348554	NA	0.101
SBP	IL2	Weighted Median	195	0.0710012950726816	0.152774655009344	-0.228431526496164	0.370434116641528	0.642113900404151	NA	NA
SBP	IL2ra	IVW-RE	195	0.0885438742078664	0.103611334279914	-0.114530609370906	0.291618357786639	0.392785306248829	NA	NA
SBP	IL2ra	MR-Egger	195	0.333360433555028	0.334476693700264	-0.322201839765525	0.98892270687558	0.318928276699955	-0.098300009029284	0.44136459285028
SBP	IL2ra	MR-PRESSO	195	0.0885438742078664	0.103611334279914	-0.114530609370906	0.291618357786639	0.392785306248829	NA	0.09
SBP	IL2ra	Weighted Median	195	0.177600435412836	0.148940267052993	-0.114317123858809	0.46951799468448	0.233093754485369	NA	NA
SBP	IL4	IVW-RE	195	0.077370123795693	0.0521788244549267	-0.0248984928916012	0.179638740482987	0.138130801122853	NA	NA
SBP	IL4	MR-Egger	195	0.159927713333204	0.170219194743729	-0.173695777841914	0.493551204508321	0.347453652394833	-0.0329814941378326	0.610304485134621
SBP	IL4	MR-PRESSO	195	0.077370123795693	0.0521788244549267	-0.0248984928916012	0.179638740482987	0.138130801122853	NA	0.469
SBP	IL4	Weighted Median	195	0.0435433571531	0.0788268933744422	-0.110954514873986	0.198041229180186	0.580679707347956	NA	NA
SBP	IL5	IVW-RE	195	0.177979600832613	0.103713845807029	-0.0252958016473048	0.381255003312531	0.0861503227081801	NA	NA
SBP	IL5	MR-Egger	195	0.46356122332421	0.334723763164817	-0.192485297248546	1.11960774389697	0.166080960548445	-0.114627488280862	0.369507556418474
SBP	IL5	MR-PRESSO	195	0.177979600832613	0.103713845807029	-0.0252958016473048	0.381255003312531	0.0861503227081801	NA	0.31
SBP	IL5	Weighted Median	195	0.279513573548583	0.156655884740014	-0.027526318508103	0.586553465605269	0.0743827282741414	NA	NA
SBP	IL6	IVW-RE	195	0.0868727250725664	0.0535405193888278	-0.0180647646431045	0.191810214788237	0.104683417497363	NA	NA
SBP	IL6	MR-Egger	195	0.101982331712063	0.174738431025659	-0.240498699813265	0.444463363237391	0.559470268516754	-0.00603808418365958	0.927601247125684
SBP	IL6	MR-PRESSO	195	0.0868727250725664	0.0535405193888278	-0.0180647646431045	0.191810214788237	0.104683417497363	NA	0.229
SBP	IL6	Weighted Median	195	0.0582715022185501	0.0773735452848712	-0.0933778598959764	0.209920864333077	0.451378290130654	NA	NA
SBP	IL7	IVW-RE	195	0.106216165168891	0.109079036220267	-0.107574817291171	0.320007147628954	0.330178619122225	NA	NA
SBP	IL7	MR-Egger	195	0.125551971548763	0.352567049672634	-0.565466747945144	0.81657069104267	0.721759634005163	-0.00776300990623806	0.953996923542844
SBP	IL7	MR-PRESSO	195	0.106216165168891	0.109079036220267	-0.107574817291171	0.320007147628954	0.330178619122225	NA	0.044
SBP	IL7	Weighted Median	195	0.148697586327691	0.158600039482342	-0.162152779004331	0.459547951659713	0.348468846979447	NA	NA
SBP	IL8	IVW-RE	195	0.0495946403845749	0.0688051853454174	-0.0852610448420463	0.184450325611196	0.471033802562173	NA	NA
SBP	IL8	MR-Egger	195	0.361125214112675	0.224946573737012	-0.0797619688575525	0.802012397082903	0.108409730292953	-0.12406211575723	0.145891541561286
SBP	IL8	MR-PRESSO	195	0.0495946403845749	0.0688051853454174	-0.0852610448420463	0.184450325611196	0.471033802562173	NA	0.09
SBP	IL8	Weighted Median	195	0.0977975057516517	0.100717965325614	-0.0996060788827058	0.295201090386009	0.331546491638493	NA	NA
SBP	IL9	IVW-RE	195	0.0601838211545364	0.105908644343739	-0.147393307410654	0.267760949719727	0.569857314226383	NA	NA
SBP	IL9	MR-Egger	195	0.241710903064582	0.342448510915729	-0.429475844889618	0.912897651018782	0.480293008555637	-0.0728578587080815	0.577173390023128
SBP	IL9	MR-PRESSO	195	0.0601838211545364	0.105908644343739	-0.147393307410654	0.267760949719727	0.569857314226383	NA	0.039
SBP	IL9	Weighted Median	195	-0.0144804400087511	0.151603762023452	-0.311618353495499	0.282657473477997	0.923905741462181	NA	NA
SBP	IP10	IVW-RE	195	-0.00416085329507457	0.0664198220443474	-0.134341312361555	0.126019605771406	0.950049392251661	NA	NA
SBP	IP10	MR-Egger	195	-0.0466618279164344	0.21607943774286	-0.470169743692105	0.376846087859236	0.829028622036058	0.0169779092230355	0.836203326535277
SBP	IP10	MR-PRESSO	195	-0.00416085329507457	0.0664198220443474	-0.134341312361555	0.126019605771406	0.950049392251661	NA	0.229
SBP	IP10	Weighted Median	195	-0.133624339057539	0.0955095690716507	-0.320819654616915	0.0535709765018369	0.161792726712256	NA	NA
SBP	MCP1	IVW-RE	195	-0.00264214244394999	0.0596154353356284	-0.119486248624458	0.114201963736558	0.964649512154669	NA	NA
SBP	MCP1	MR-Egger	195	0.178595825851517	0.194107322052478	-0.201847534506857	0.55903918620989	0.357526752845469	-0.0724211286811362	0.326529490466656
SBP	MCP1	MR-PRESSO	194	-0.014615897032753	0.0586543557918064	-0.129578434384694	0.100346640319188	0.803481203871874	NA	0.001
SBP	MCP1	Weighted Median	195	0.0141291626937721	0.0804176636334118	-0.143486561748571	0.171744887136116	0.860531792538939	NA	NA
SBP	MCP3	IVW-RE	195	-0.43686402824802	0.177392532411152	-0.784547002900232	-0.0891810535958091	0.0137896458525935	NA	NA
SBP	MCP3	MR-Egger	195	0.328373892965905	0.569034167989752	-0.786912582266724	1.44366036819853	0.563890571867925	-0.308158939025912	0.156971037009108
SBP	MCP3	MR-PRESSO	195	-0.43686402824802	0.177392532411152	-0.784547002900232	-0.0891810535958091	0.0137896458525935	NA	0.608
SBP	MCP3	Weighted Median	195	-0.589583131042836	0.271709223707238	-1.12212342377636	-0.0570428383093122	0.0300140635682547	NA	NA
SBP	MCSF	IVW-RE	194	-0.07819317026579	0.117741567188698	-0.308962401438941	0.152576060907361	0.50662089912095	NA	NA
SBP	MCSF	MR-Egger	194	-0.671097519326011	0.377586093644926	-1.41115266393323	0.0689576252812118	0.0755129033484019	0.238832502214657	0.0984015959057183
SBP	MCSF	MR-PRESSO	194	-0.07819317026579	0.117741567188698	-0.308962401438941	0.152576060907361	0.50662089912095	NA	0.583
SBP	MCSF	Weighted Median	194	-0.116139051608235	0.178584230313294	-0.466157711229098	0.233879608012628	0.515477747928236	NA	NA
SBP	MIF	IVW-RE	195	0.102451723402834	0.102617720657136	-0.0986753132607452	0.303578760066413	0.31809397806318	NA	NA
SBP	MIF	MR-Egger	195	0.269552293640042	0.331660264621102	-0.380489880120342	0.919594467400426	0.416369338014037	-0.0670674087011146	0.596157932206028
SBP	MIF	MR-PRESSO	195	0.102451723402834	0.102617720657136	-0.0986753132607452	0.303578760066413	0.31809397806318	NA	0.254
SBP	MIF	Weighted Median	195	0.0726660465624654	0.152409980661814	-0.226052026419136	0.371384119544067	0.6335187142114	NA	NA
SBP	MIG	IVW-RE	195	0.0371784638965584	0.100584234523688	-0.1599630131824	0.234319940975517	0.711661800916161	NA	NA
SBP	MIG	MR-Egger	195	0.446555415028873	0.321011383453259	-0.182615335166892	1.07572616522464	0.164198430051123	-0.164751591781841	0.179402747233647
SBP	MIG	MR-PRESSO	195	0.0371784638965584	0.100584234523688	-0.1599630131824	0.234319940975517	0.711661800916161	NA	0.229
SBP	MIG	Weighted Median	195	0.042728909119277	0.14786141917977	-0.247074147176053	0.332531965414607	0.772597116294815	NA	NA
SBP	MIP1a	IVW-RE	195	0.0609107104384037	0.10663140211857	-0.148082997335002	0.269904418211809	0.567845940270231	NA	NA
SBP	MIP1a	MR-Egger	195	-0.063486483389661	0.344719219500886	-0.739123738390154	0.612150771610832	0.853881129463075	0.04993332590581	0.704267918426919
SBP	MIP1a	MR-PRESSO	195	0.0609107104384037	0.10663140211857	-0.148082997335002	0.269904418211809	0.567845940270231	NA	0.06
SBP	MIP1a	Weighted Median	195	0.11498064214638	0.155743989119777	-0.190271967336982	0.420233251629742	0.460352236946129	NA	NA
SBP	MIP1b	IVW-RE	195	-0.0161869169426603	0.0716588827439825	-0.156635746293245	0.124261912407924	0.821288148774548	NA	NA
SBP	MIP1b	MR-Egger	195	0.151078158019032	0.231160819384225	-0.301988722610817	0.60414503864888	0.513393390079778	-0.06719457353498	0.446556863316931
SBP	MIP1b	MR-PRESSO	194	0.000385004649395553	0.0700106577640234	-0.13683588456809	0.137605893866881	0.995617952081836	NA	0.02
SBP	MIP1b	Weighted Median	195	0.0172885698585125	0.102762926779487	-0.184123065575209	0.218700205292234	0.866396502147995	NA	NA
SBP	PDGFbb	IVW-RE	195	0.106769689432125	0.0647712944823372	-0.0201797149852939	0.233719093849544	0.0992684390412357	NA	NA
SBP	PDGFbb	MR-Egger	195	0.0121194102785391	0.208721633802222	-0.396967474768173	0.421206295325251	0.953696896749435	0.038039798603452	0.633343254404895
SBP	PDGFbb	MR-PRESSO	195	0.106769689432125	0.0647712944823372	-0.0201797149852939	0.233719093849544	0.0992684390412357	NA	0.586
SBP	PDGFbb	Weighted Median	195	0.153511370502137	0.0971734936771916	-0.0369451773570892	0.343967918361363	0.114160490351004	NA	NA
SBP	RANTES	IVW-RE	195	-0.0663239031686453	0.101855221152212	-0.265956468264344	0.133308661927053	0.514944112210053	NA	NA
SBP	RANTES	MR-Egger	195	-0.0316282428735142	0.329308582317472	-0.677061204015702	0.613804718268674	0.923485315051607	-0.0139307752822995	0.911757614312438
SBP	RANTES	MR-PRESSO	195	-0.0663239031686453	0.101855221152212	-0.265956468264344	0.133308661927053	0.514944112210053	NA	0.389
SBP	RANTES	Weighted Median	195	0.000999679047372404	0.152185888452215	-0.2972791812742	0.299278539368945	0.994758891578986	NA	NA
SBP	sCD40L	IVW-RE	194	0.067374158653472	0.0826782234819895	-0.0946721816769811	0.229420498983925	0.415131808030168	NA	NA
SBP	sCD40L	MR-Egger	194	-0.000591483446835106	0.265228001583171	-0.520428814241383	0.519245847347713	0.998220643686932	0.0273273472033448	0.787397404015394
SBP	sCD40L	MR-PRESSO	194	0.067374158653472	0.0826782234819895	-0.0946721816769811	0.229420498983925	0.415131808030168	NA	0.946
SBP	sCD40L	Weighted Median	194	0.0527878691371984	0.12488272047669	-0.191977765288497	0.297553503562894	0.672514487530615	NA	NA
SBP	SCF	IVW-RE	195	-0.0281433786006345	0.0647160227752836	-0.154984452462864	0.0986976952615952	0.663653182116683	NA	NA
SBP	SCF	MR-Egger	195	-0.194438084227071	0.208561411407728	-0.603210939151058	0.214334770696916	0.351190722161589	0.0667901287454341	0.401613915387776
SBP	SCF	MR-PRESSO	195	-0.0281433786006345	0.0647160227752836	-0.154984452462864	0.0986976952615952	0.663653182116683	NA	0.793
SBP	SCF	Weighted Median	195	0.00320257732137196	0.0985914667423756	-0.190033146676663	0.196438301319407	0.974086624533462	NA	NA
SBP	SCGFb	IVW-RE	195	0.118524629444895	0.0989334235844858	-0.0753813176479424	0.312430576537733	0.230907620339565	NA	NA
SBP	SCGFb	MR-Egger	195	0.434111090451277	0.316371213094148	-0.185965092958499	1.05418727386105	0.17001445432465	-0.126999208361707	0.293645090201818
SBP	SCGFb	MR-PRESSO	195	0.118524629444895	0.0989334235844858	-0.0753813176479424	0.312430576537733	0.230907620339565	NA	0.343
SBP	SCGFb	Weighted Median	195	0.108067426476702	0.148653602878046	-0.183288281336387	0.399423134289791	0.467241379795283	NA	NA
SBP	SDF1a	IVW-RE	195	0.144785387934738	0.0690633861698697	0.00942363839141152	0.280147137478064	0.0360455607550054	NA	NA
SBP	SDF1a	MR-Egger	195	0.0696548114169112	0.223015048519389	-0.367446651691544	0.506756274525366	0.754787966575503	0.0302049674590225	0.723048070911615
SBP	SDF1a	MR-PRESSO	195	0.144785387934738	0.0690633861698697	0.00942363839141152	0.280147137478064	0.0360455607550054	NA	0.247
SBP	SDF1a	Weighted Median	195	0.120410159430787	0.102379770789485	-0.0802505040620694	0.321070822923643	0.23954980150819	NA	NA
SBP	SeSelectin	IVW-RE	194	0.150622704403579	0.083834735084872	-0.0136903570162272	0.314935765823384	0.0723892541816557	NA	NA
SBP	SeSelectin	MR-Egger	194	0.392313093190611	0.268901582176667	-0.134724323261493	0.919350509642716	0.144579760602271	-0.097194931356982	0.344157937103904
SBP	SeSelectin	MR-PRESSO	194	0.150622704403579	0.083834735084872	-0.0136903570162272	0.314935765823384	0.0723892541816557	NA	0.29
SBP	SeSelectin	Weighted Median	194	0.0637620868727738	0.12460646351996	-0.180462093867252	0.307986267612799	0.608855596214164	NA	NA
SBP	sICAM	IVW-RE	194	0.0658364243753707	0.0833141303175755	-0.0974562704503538	0.229129119201095	0.429399772193646	NA	NA
SBP	sICAM	MR-Egger	194	-0.230464293588779	0.266888011323171	-0.753555183687711	0.292626596510154	0.387849243382104	0.119161616738329	0.242610727490224
SBP	sICAM	MR-PRESSO	194	0.0658364243753707	0.0833141303175755	-0.0974562704503538	0.229129119201095	0.429399772193646	NA	0.328
SBP	sICAM	Weighted Median	194	0.0189951469315522	0.123318573852946	-0.222704816445065	0.260695110308169	0.87758360685611	NA	NA
SBP	sVCAM	IVW-RE	194	0.0646299197280343	0.0815984182467427	-0.0953000412310173	0.224559880687086	0.428332290334229	NA	NA
SBP	sVCAM	MR-Egger	194	0.329247886608806	0.261689878238012	-0.183654849856369	0.842150623073982	0.208333691346612	-0.106414093419833	0.287215893335178
SBP	sVCAM	MR-PRESSO	194	0.0646299197280343	0.0815984182467427	-0.0953000412310173	0.224559880687086	0.428332290334229	NA	0.917
SBP	sVCAM	Weighted Median	194	0.126919472382762	0.12189152665857	-0.111983529888638	0.365822474654163	0.297759839197107	NA	NA
SBP	TNFa	IVW-RE	195	-0.0345513421193291	0.0647664322922446	-0.16149121681928	0.0923885325806223	0.593704068046997	NA	NA
SBP	TNFa	MR-Egger	195	0.0781719559455484	0.213307593468786	-0.339903244882183	0.49624715677328	0.714010469566349	-0.0449561214239315	0.579072886991212
SBP	TNFa	MR-PRESSO	195	-0.0345513421193291	0.0647664322922446	-0.16149121681928	0.0923885325806223	0.593704068046997	NA	0.411
SBP	TNFa	Weighted Median	195	-0.112547837703145	0.0975111474496982	-0.303666174795728	0.078570499389438	0.248416201433552	NA	NA
SBP	TNFb	IVW-RE	193	-0.186841341051492	0.149030976356472	-0.478936687291018	0.105254005188034	0.209948125541943	NA	NA
SBP	TNFb	MR-Egger	193	-0.621810579433121	0.481348178358004	-1.56523567303877	0.321614514172529	0.196422815292086	0.175004610680729	0.341937072906314
SBP	TNFb	MR-PRESSO	193	-0.186841341051492	0.149030976356472	-0.478936687291018	0.105254005188034	0.209948125541943	NA	0.677
SBP	TNFb	Weighted Median	193	-0.100229305295895	0.232255687046223	-0.555442087111099	0.354983476519308	0.666070497176128	NA	NA
SBP	TRAIL	IVW-RE	195	0.0263347956505376	0.0712114197842396	-0.113237022414535	0.16590661371561	0.711523012112874	NA	NA
SBP	TRAIL	MR-Egger	195	0.340954255755273	0.228769842576697	-0.10742639644395	0.789334907954496	0.136124052103103	-0.126467507680021	0.147972812531553
SBP	TRAIL	MR-PRESSO	195	0.0263347956505376	0.0712114197842396	-0.113237022414535	0.16590661371561	0.711523012112874	NA	0.025
SBP	TRAIL	Weighted Median	195	0.025928935731303	0.0994052705582029	-0.168901814436234	0.22075968589884	0.794215392404291	NA	NA
SBP	VEGF	IVW-RE	195	0.0391726013363772	0.0549970094733119	-0.0686195564887224	0.146964759161477	0.476298932594428	NA	NA
SBP	VEGF	MR-Egger	195	-0.0121477541429271	0.179686149075058	-0.364326134850736	0.340030626564882	0.946099755948538	0.0204984744315721	0.76411448553554
SBP	VEGF	MR-PRESSO	195	0.0391726013363772	0.0549970094733119	-0.0686195564887224	0.146964759161477	0.476298932594428	NA	0.336
SBP	VEGF	Weighted Median	195	0.0348007884721117	0.082231074272855	-0.126369155512722	0.195970732456946	0.672144042867824	NA	NA
smok	activePAI	IVW-RE	120	0.322864853242365	0.204117427186692	-0.0771979526605289	0.722927659145258	0.113704289551649	NA	NA
smok	activePAI	MR-Egger	120	1.17487012947666	0.894096093439032	-0.577526012381801	2.92726627133512	0.188835717390818	-0.00900578905137263	0.327688484889366
[truncated: 1,294 more rows]

## Sheet: ST6 - cis-pQTL instruments
exposure	rsid	CHR	POS	EA	NEA	EAF	BETA	SE	P	F	Source	Sample size
[truncated: 302 more rows]

## Sheet: ST7 - cis-eQTL instruments
exposure	rsid	CHR	POS	EA	NEA	EAF	BETA	SE	P	F	Source	N	Z_gtex	Z_eqtlgen
[truncated: 34 more rows]

[truncated: 5 more sheets: ST8 - cytokine MR results, ST9 - colocalization cytokines, ST10 - cardiometabolic MR, ST11 - MR with genome-wide inst, ST12 - outcome colocalization]
